# Supplementary material for: Pd(ii)-catalyzed regioselective ring opening/[3+2] annulation reaction of enaminones with cyclopropenones: divergent synthesis of γ-butenolides and γ-lactams
Source: Royal Society of Chemistry journal article supplement (doi:10.1039/d4cc05895j), 2024-01-01
Supplement: d4cc05895j1.pdf [file d4cc05895j1.pdf]

## Supporting Information

### **Pd(II)-Catalyzed Regionselective Ring Opening/[3+2] Annulation Reaction of Enaminones with Cyclopropenones: Divergent Synthesis of $\gamma$ -Butenolides and $\gamma$ -Lactams**

Zhilai Zhang,<sup>§,a</sup> Yu Xu,<sup>§,a</sup> Menglin Peng,<sup>a</sup> Siyu Song,<sup>a</sup> Yuanzheng Wei,<sup>a</sup> Huimin Hu,<sup>a</sup> Xiuju Wang,<sup>\*,b</sup> and Fuchao Yu<sup>\*,a</sup>

<sup>a</sup>Faculty of Life Science and Technology, Kunming University of Science and Technology, Kunming, 650500, People's Republic of China.

E-mail: [yufuchao05@126.com](mailto:yufuchao05@126.com); [yufc@kust.edu.cn](mailto:yufc@kust.edu.cn)

<sup>b</sup>School of Basic Medicine Science, Sanquan College of Xinxiang Medical University, Xinxiang, 453003, People's Republic of China.

E-mail: [wangxiuju0205@163.com](mailto:wangxiuju0205@163.com)

<sup>§</sup>Z. Zhang and Y. Xu contributed equally.

### Table of Contents

|                                                                                   |     |
|-----------------------------------------------------------------------------------|-----|
| 1. General information.....                                                       | 2   |
| 2. Optimization of reaction conditions.....                                       | 3   |
| 3. General procedure.....                                                         | 5   |
| 4. Spectroscopic data.....                                                        | 13  |
| 5. X-ray Structure and Data.....                                                  | 42  |
| 6. <sup>1</sup> H NMR and <sup>13</sup> C NMR spectra for spectroscopic data..... | 45  |
| 7. References and notes.....                                                      | 201 |

## 1. General information.

All compounds were fully characterized by spectroscopic data. The NMR spectra were recorded on a DRX600 ( $^1\text{H}$ : 500 MHz and 600 MHz,  $^{13}\text{C}$ : 125 MHz and 150 MHz), chemical shifts ( $\delta$ ) are expressed in ppm, and  $J$  values are given in Hz, and deuterated  $\text{CDCl}_3$  and  $\text{DMSO-}d_6$  were used as solvent. The reactions were monitored by thin layer chromatography (TLC) using silica gel GF<sub>254</sub>. The melting points were determined on XT-4A melting point apparatus and are uncorrected. HRMs were performed on an Agilent LC/MS TOF instrument.

All chemicals and solvents were used as received without further purification unless otherwise stated. Column chromatography was performed on silica gel (200–300 mesh).

Enaminones **1** were prepared according to the literature<sup>1</sup>, cyclopropanones **2** were prepared according to the literature<sup>2</sup>, other reagents were purchased from Energy Chemical and Adamas-beta®.

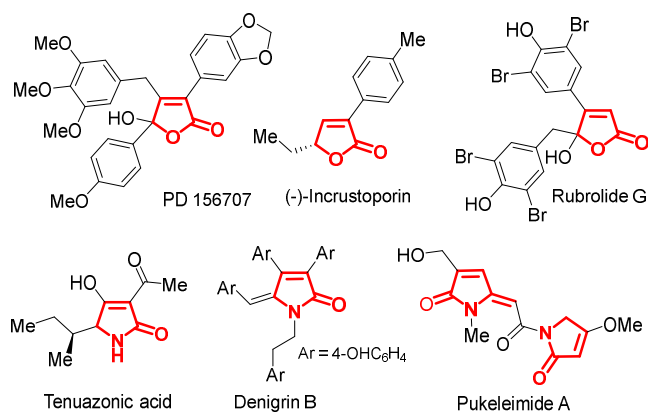

**Figure S1.** Representative natural  $\gamma$ -butenolides and  $\gamma$ -lactams.

## 2. Optimization of reaction conditions.

**Table S1.** Optimization of the reaction conditions for the  $\gamma$ -butenolides synthesis.<sup>a,b</sup>

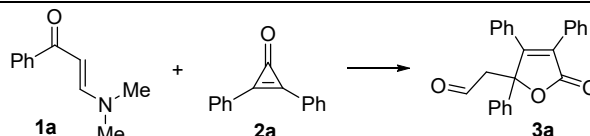

The reaction scheme shows the synthesis of  $\gamma$ -butenolide **3a** from enamine **1a** and cyclic anhydride **2a**. Enamine **1a** is N,N-dimethyl-1-(benzylideneamino)ethane-1-one. Cyclic anhydride **2a** is 1,3-diphenylisobenzofuran-2(1H)-one. The product **3a** is 2-(benzylideneamino)-2-phenyl-1,3-diphenylbut-3-en-1-one.

| entry     | Catalyst (eq.)                                           | Additive (eq.)             | Co-catalyst (eq.)       | Solvent                 | T (°C)    | Time (h) | Yield (%) |
|-----------|----------------------------------------------------------|----------------------------|-------------------------|-------------------------|-----------|----------|-----------|
| 1         | PdCl <sub>2</sub> (0.5)                                  | /                          | /                       | MeNO <sub>2</sub>       | 50        | 12       | 47        |
| 2         | Pd(OAc) <sub>2</sub> (0.5)                               | /                          | /                       | MeNO <sub>2</sub>       | 50        | 12       | n.d.      |
| 3         | PdCl <sub>2</sub> (PPh <sub>3</sub> ) <sub>2</sub> (0.5) | /                          | /                       | MeNO <sub>2</sub>       | 50        | 12       | n.d.      |
| 4         | PdTFA (0.5)                                              | /                          | /                       | MeNO <sub>2</sub>       | 50        | 12       | n.d.      |
| 5         | PdO (0.5)                                                | /                          | /                       | MeNO <sub>2</sub>       | 50        | 12       | n.d.      |
| 6         | FeCl <sub>3</sub> (0.5)                                  | /                          | /                       | MeNO <sub>2</sub>       | 50        | 12       | n.r.      |
| 7         | FeCl <sub>2</sub> (0.5)                                  | /                          | /                       | MeNO <sub>2</sub>       | 50        | 12       | n.d.      |
| 8         | FeBr <sub>2</sub> (0.5)                                  | /                          | /                       | MeNO <sub>2</sub>       | 50        | 12       | n.d.      |
| 9         | NiCl <sub>2</sub> (0.5)                                  | /                          | /                       | MeNO <sub>2</sub>       | 50        | 12       | n.r.      |
| 10        | CoCl <sub>2</sub> (0.5)                                  | /                          | /                       | MeNO <sub>2</sub>       | 50        | 12       | 20        |
| 11        | CuCl <sub>2</sub> (0.5)                                  | /                          | /                       | MeNO <sub>2</sub>       | 50        | 12       | 26        |
| 12        | CuCl (0.5)                                               | /                          | /                       | MeNO <sub>2</sub>       | 50        | 12       | n.d.      |
| 13        | CuI (0.5)                                                | /                          | /                       | MeNO <sub>2</sub>       | 50        | 12       | n.d.      |
| 14        | Cu(OAc) <sub>2</sub> (0.5)                               | /                          | /                       | MeNO <sub>2</sub>       | 50        | 12       | n.d.      |
| 15        | Cu(OTf) <sub>2</sub> (0.5)                               | /                          | /                       | MeNO <sub>2</sub>       | 50        | 12       | n.d.      |
| 16        | Bi(OTf) <sub>3</sub> (0.5)                               | /                          | /                       | MeNO <sub>2</sub>       | 50        | 12       | trace     |
| 17        | PPh <sub>3</sub> (0.5)                                   | /                          | /                       | MeNO <sub>2</sub>       | 50        | 12       | n.d.      |
| 18        | PdCl <sub>2</sub> (0.5)                                  | AcOH (1)                   | /                       | MeNO <sub>2</sub>       | 50        | 12       | 38        |
| 19        | PdCl <sub>2</sub> (0.5)                                  | <i>p</i> -TSA (1)          | /                       | MeNO <sub>2</sub>       | 50        | 12       | 34        |
| 20        | PdCl <sub>2</sub> (0.5)                                  | MeSO <sub>3</sub> H (1)    | /                       | MeNO <sub>2</sub>       | 50        | 12       | 30        |
| 21        | PdCl <sub>2</sub> (0.5)                                  | Ac <sub>2</sub> O (1)      | /                       | MeNO <sub>2</sub>       | 50        | 12       | 59        |
| 22        | PdCl <sub>2</sub> (0.5)                                  | Adipic acid (1)            | /                       | MeNO <sub>2</sub>       | 50        | 12       | 41        |
| 23        | PdCl <sub>2</sub> (0.5)                                  | Benzoic anhydride (1)      | /                       | MeNO <sub>2</sub>       | 50        | 12       | 43        |
| 24        | PdCl <sub>2</sub> (0.5)                                  | TFAA (1)                   | /                       | MeNO <sub>2</sub>       | 50        | 12       | 30        |
| 25        | PdCl <sub>2</sub> (0.5)                                  | Succinic anhydride (1)     | /                       | MeNO <sub>2</sub>       | 50        | 12       | 49        |
| 26        | PdCl <sub>2</sub> (0.5)                                  | Pivalic anhydride (1)      | /                       | MeNO <sub>2</sub>       | 50        | 12       | 46        |
| 27        | PdCl <sub>2</sub> (0.5)                                  | Isobutyric anhydride (1)   | /                       | MeNO <sub>2</sub>       | 50        | 12       | 42        |
| 28        | PdCl <sub>2</sub> (0.5)                                  | Ac <sub>2</sub> O (2)      | /                       | MeNO <sub>2</sub>       | 50        | 12       | 73        |
| 29        | PdCl <sub>2</sub> (0.5)                                  | Ac <sub>2</sub> O (3)      | /                       | MeNO <sub>2</sub>       | 50        | 12       | 82        |
| 30        | PdCl <sub>2</sub> (0.5)                                  | Ac <sub>2</sub> O (4)      | /                       | MeNO <sub>2</sub>       | 50        | 12       | 81        |
| 31        | PdCl <sub>2</sub> (0.5)                                  | Ac <sub>2</sub> O (3)      | /                       | DCM                     | 50        | 12       | 67        |
| 32        | PdCl <sub>2</sub> (0.5)                                  | Ac <sub>2</sub> O (3)      | /                       | DCE                     | 50        | 12       | 53        |
| 33        | PdCl <sub>2</sub> (0.5)                                  | Ac <sub>2</sub> O (3)      | /                       | THF                     | 50        | 12       | n.d.      |
| 34        | PdCl <sub>2</sub> (0.5)                                  | Ac <sub>2</sub> O (3)      | /                       | CHCl <sub>3</sub>       | 50        | 12       | 35        |
| 35        | PdCl <sub>2</sub> (0.5)                                  | Ac <sub>2</sub> O (3)      | /                       | MeOH                    | 50        | 12       | n.d.      |
| 36        | PdCl <sub>2</sub> (0.5)                                  | Ac <sub>2</sub> O (3)      | /                       | DMF                     | 50        | 12       | n.d.      |
| 37        | PdCl <sub>2</sub> (0.5)                                  | Ac <sub>2</sub> O (3)      | /                       | 1,4-Dioxane             | 50        | 12       | 31        |
| 38        | PdCl <sub>2</sub> (0.5)                                  | Ac <sub>2</sub> O (3)      | /                       | MeCN                    | 50        | 12       | 28        |
| 39        | PdCl <sub>2</sub> (0.5)                                  | Ac <sub>2</sub> O (3)      | /                       | MeNO <sub>2</sub>       | 60        | 12       | 92        |
| 40        | PdCl <sub>2</sub> (0.5)                                  | Ac <sub>2</sub> O (3)      | /                       | MeNO <sub>2</sub>       | 70        | 12       | 91        |
| 41        | PdCl <sub>2</sub> (0.5)                                  | Ac <sub>2</sub> O (3)      | /                       | MeNO <sub>2</sub>       | 60        | 6        | 92        |
| 42        | PdCl <sub>2</sub> (0.5)                                  | Ac <sub>2</sub> O (3)      | /                       | MeNO <sub>2</sub>       | 60        | 4        | 85        |
| 43        | PdCl <sub>2</sub> (0.1)                                  | Ac <sub>2</sub> O (3)      | /                       | MeNO <sub>2</sub>       | 60        | 6        | 58        |
| 44        | PdCl <sub>2</sub> (0.3)                                  | Ac <sub>2</sub> O (3)      | /                       | MeNO <sub>2</sub>       | 60        | 6        | 70        |
| 45        | PdCl <sub>2</sub> (0.1)                                  | Ac <sub>2</sub> O (3)      | CuCl <sub>2</sub> (0.5) | MeNO <sub>2</sub>       | 60        | 6        | 73        |
| 46        | PdCl <sub>2</sub> (0.1)                                  | Ac <sub>2</sub> O (3)      | AgCl (0.5)              | MeNO <sub>2</sub>       | 60        | 6        | 40        |
| 47        | PdCl <sub>2</sub> (0.1)                                  | Ac <sub>2</sub> O (3)      | CuCl (0.5)              | MeNO <sub>2</sub>       | 60        | 6        | 90        |
| 48        | PdCl <sub>2</sub> (0.1)                                  | Ac <sub>2</sub> O (3)      | CoCl <sub>2</sub> (0.5) | MeNO <sub>2</sub>       | 60        | 6        | 63        |
| 49        | PdCl <sub>2</sub> (0.1)                                  | Ac <sub>2</sub> O (3)      | NiCl <sub>2</sub> (0.5) | MeNO <sub>2</sub>       | 60        | 6        | 65        |
| <b>50</b> | <b>PdCl<sub>2</sub> (0.1)</b>                            | <b>Ac<sub>2</sub>O (3)</b> | <b>CuCl (0.25)</b>      | <b>MeNO<sub>2</sub></b> | <b>60</b> | <b>6</b> | <b>92</b> |
| 51        | PdCl <sub>2</sub> (0.1)                                  | Ac <sub>2</sub> O (3)      | CuCl (0.1)              | MeNO <sub>2</sub>       | 60        | 6        | 80        |
| 52        | PdCl <sub>2</sub> (0.05)                                 | Ac <sub>2</sub> O (3)      | CuCl (0.25)             | MeNO <sub>2</sub>       | 60        | 6        | 82        |
| 53        | PdCl <sub>2</sub> (0.1)                                  | Ac <sub>2</sub> O (2)      | CuCl (0.25)             | MeNO <sub>2</sub>       | 60        | 6        | 86        |
| 54        | PdCl <sub>2</sub> (0.1)                                  | Ac <sub>2</sub> O (4)      | CuCl (0.25)             | MeNO <sub>2</sub>       | 60        | 6        | 92        |

<sup>a</sup>Reaction conditions: **1a** (0.1 mmol), **2a** (0.12 mmol) and catalyst in 1.0 mL solvent for 6.0 h-12.0 h. <sup>b</sup>Isolated yields.

**Table S2.** Optimization of the reaction conditions for the  $\gamma$ -lactams synthesis.<sup>a,b</sup>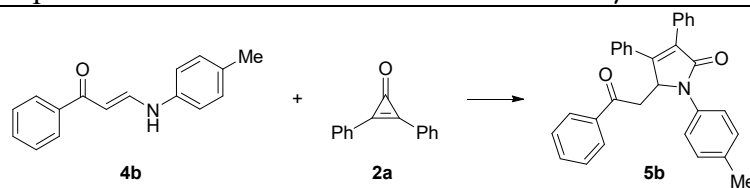

| Entry | Catalyst (eq.)                | Additive (eq.)                      | Solvent                 | T (°C)    | Time (h)  | Yield (%) |
|-------|-------------------------------|-------------------------------------|-------------------------|-----------|-----------|-----------|
| 1     | PdCl <sub>2</sub> (1)         | /                                   | MeNO <sub>2</sub>       | 50        | 12        | 45        |
| 2     | PdCl <sub>2</sub> (1)         | /                                   | DCM                     | 50        | 12        | n.d.      |
| 3     | PdCl <sub>2</sub> (1)         | /                                   | 1,4-Dioxane             | 50        | 12        | n.d.      |
| 4     | PdCl <sub>2</sub> (1)         | /                                   | TFE                     | 50        | 12        | n.d.      |
| 5     | PdCl <sub>2</sub> (1)         | /                                   | MeCN                    | 50        | 12        | n.d.      |
| 6     | PdCl <sub>2</sub> (1)         | /                                   | HFIP                    | 50        | 12        | n.d.      |
| 7     | PdCl <sub>2</sub> (1)         | /                                   | DCE                     | 50        | 12        | n.d.      |
| 8     | PdCl <sub>2</sub> (1)         | /                                   | CHCl <sub>3</sub>       | 50        | 12        | n.d.      |
| 9     | PdCl <sub>2</sub> (1)         | /                                   | DMSO                    | 50        | 12        | n.d.      |
| 10    | PdCl <sub>2</sub> (1)         | /                                   | PhCl                    | 50        | 12        | n.d.      |
| 11    | PdCl <sub>2</sub> (1)         | /                                   | DMF                     | 50        | 12        | n.d.      |
| 12    | PdCl <sub>2</sub> (1)         | /                                   | Toluene                 | 50        | 12        | n.d.      |
| 13    | PdCl <sub>2</sub> (0.5)       | /                                   | MeNO <sub>2</sub>       | 50        | 12        | 44        |
| 14    | PdCl <sub>2</sub> (0.25)      | /                                   | MeNO <sub>2</sub>       | 50        | 12        | 27        |
| 15    | FeCl <sub>3</sub> (0.5)       | /                                   | MeNO <sub>2</sub>       | 50        | 12        | n.r.      |
| 16    | FeCl <sub>2</sub> (0.5)       | /                                   | MeNO <sub>2</sub>       | 50        | 12        | n.d.      |
| 17    | CuCl <sub>2</sub> (0.5)       | /                                   | MeNO <sub>2</sub>       | 50        | 12        | n.d.      |
| 18    | ZnCl <sub>2</sub> (0.5)       | /                                   | MeNO <sub>2</sub>       | 50        | 12        | n.r.      |
| 19    | BiCl <sub>3</sub> (0.5)       | /                                   | MeNO <sub>2</sub>       | 50        | 12        | n.d.      |
| 20    | PdCl <sub>2</sub> (0.5)       | NaOAc (1)                           | MeNO <sub>2</sub>       | 50        | 12        | n.d.      |
| 21    | PdCl <sub>2</sub> (0.5)       | CS <sub>2</sub> CO <sub>3</sub> (1) | MeNO <sub>2</sub>       | 50        | 12        | n.r.      |
| 22    | PdCl <sub>2</sub> (0.5)       | NaBF <sub>4</sub> (1)               | MeNO <sub>2</sub>       | 50        | 12        | trace     |
| 23    | PdCl <sub>2</sub> (0.5)       | BiCl <sub>3</sub> (1)               | MeNO <sub>2</sub>       | 50        | 12        | 30        |
| 24    | PdCl <sub>2</sub> (0.5)       | AgCl (1)                            | MeNO <sub>2</sub>       | 50        | 12        | trace     |
| 25    | PdCl <sub>2</sub> (0.5)       | CuCl <sub>2</sub> (1)               | MeNO <sub>2</sub>       | 50        | 12        | n.d.      |
| 26    | PdCl <sub>2</sub> (0.5)       | FeCl <sub>2</sub> (1)               | MeNO <sub>2</sub>       | 50        | 12        | n.d.      |
| 27    | PdCl <sub>2</sub> (0.5)       | NiCl <sub>2</sub> (1)               | MeNO <sub>2</sub>       | 50        | 12        | trace     |
| 28    | PdCl <sub>2</sub> (0.5)       | CoCl <sub>2</sub> (1)               | MeNO <sub>2</sub>       | 50        | 12        | trace     |
| 29    | PdCl <sub>2</sub> (0.5)       | ZnCl <sub>2</sub> (1)               | MeNO <sub>2</sub>       | 50        | 12        | n.d.      |
| 30    | PdCl <sub>2</sub> (0.5)       | TMSCl (1)                           | MeNO <sub>2</sub>       | 50        | 12        | 24        |
| 31    | PdCl <sub>2</sub> (0.5)       | TBPB (1)                            | MeNO <sub>2</sub>       | 50        | 12        | trace     |
| 32    | PdCl <sub>2</sub> (0.5)       | PIDA (1)                            | MeNO <sub>2</sub>       | 50        | 12        | n.d.      |
| 33    | PdCl <sub>2</sub> (0.5)       | HCl (1)                             | MeNO <sub>2</sub>       | 50        | 12        | n.d.      |
| 34    | PdCl <sub>2</sub> (0.5)       | MeSO <sub>3</sub> H (1)             | MeNO <sub>2</sub>       | 50        | 12        | n.d.      |
| 35    | PdCl <sub>2</sub> (0.5)       | Ac <sub>2</sub> O (1)               | MeNO <sub>2</sub>       | 50        | 12        | 50        |
| 36    | PdCl <sub>2</sub> (0.5)       | Benzoic anhydride (1)               | MeNO <sub>2</sub>       | 50        | 12        | n.d.      |
| 37    | PdCl <sub>2</sub> (0.5)       | TFAA (1)                            | MeNO <sub>2</sub>       | 50        | 12        | trace     |
| 38    | PdCl <sub>2</sub> (0.5)       | Succinic anhydride (1)              | MeNO <sub>2</sub>       | 50        | 12        | trace     |
| 39    | PdCl <sub>2</sub> (0.5)       | Hexanoic anhydride (1)              | MeNO <sub>2</sub>       | 50        | 12        | trace     |
| 40    | PdCl <sub>2</sub> (0.5)       | Trimethylacetic anhydride (1)       | MeNO <sub>2</sub>       | 50        | 12        | 41        |
| 41    | PdCl <sub>2</sub> (0.5)       | Isobutyric anhydride (1)            | MeNO <sub>2</sub>       | 50        | 12        | 26        |
| 42    | PdCl <sub>2</sub> (0.5)       | Ac <sub>2</sub> O (2)               | MeNO <sub>2</sub>       | 50        | 12        | 57        |
| 43    | <b>PdCl<sub>2</sub> (0.5)</b> | <b>Ac<sub>2</sub>O (3)</b>          | <b>MeNO<sub>2</sub></b> | <b>50</b> | <b>12</b> | <b>65</b> |
| 44    | PdCl <sub>2</sub> (0.5)       | Ac <sub>2</sub> O (4)               | MeNO <sub>2</sub>       | 50        | 12        | 65        |
| 45    | PdCl <sub>2</sub> (0.5)       | AcOH (3)                            | MeNO <sub>2</sub>       | 50        | 12        | 23        |
| 46    | PdCl <sub>2</sub> (0.5)       | Ac <sub>2</sub> O (3)               | MeNO <sub>2</sub>       | 50        | 6         | 36        |
| 47    | PdCl <sub>2</sub> (0.5)       | Ac <sub>2</sub> O (3)               | MeNO <sub>2</sub>       | 50        | 9         | 48        |
| 48    | PdCl <sub>2</sub> (0.5)       | Ac <sub>2</sub> O (3)               | MeNO <sub>2</sub>       | 50        | 15        | 64        |
| 49    | /                             | Ac <sub>2</sub> O (3)               | MeNO <sub>2</sub>       | 50        | 12        | n.r.      |
| 50    | PdCl <sub>2</sub> (0.5)       | Ac <sub>2</sub> O (3)               | MeNO <sub>2</sub>       | 40        | 12        | 45        |
| 51    | PdCl <sub>2</sub> (0.5)       | Ac <sub>2</sub> O (3)               | MeNO <sub>2</sub>       | 60        | 12        | 53        |

<sup>a</sup>Reaction conditions: **4b** (0.1 mmol), **2a** (0.12 mmol) and catalyst in 1.0 mL solvent for 6.0-12.0 h. <sup>b</sup>Isolated yields.



### 3. General procedure.

#### 3.1 Synthesis of $\gamma$ -butenolides **3**.

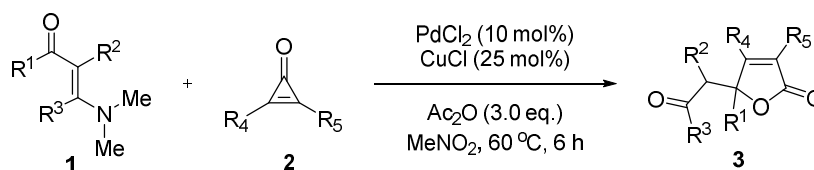

*N,N*-Dimethyl enaminones **1** (0.2 mmol), cyclopropenone **2** (0.24 mmol, 1.2 eq.), PdCl<sub>2</sub> (10 mol%), CuCl (25 mol%), Ac<sub>2</sub>O (0.6 mmol, 3.0 eq.), and MeNO<sub>2</sub> (2 mL) were charged into a 15 mL Ace Glass pressure tubes, and the mixture was stirred at 60 °C (metal bath) for 6.0 h until **1** were completely consumed. The mixture was cooled to room temperature, and then EtOAc (15 mL  $\times$  2) were added. The organic phase was washed with water (10 mL), dried over Na<sub>2</sub>SO<sub>4</sub>, concentrated and purified by flash column chromatography to afford  $\gamma$ -butenolides **3**.

#### 3.2 Synthesis of $\gamma$ -lactams **5**.

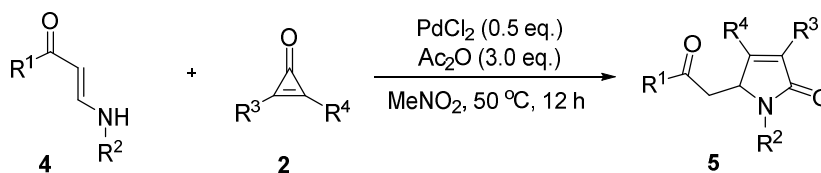

Enaminones **4** (0.2 mmol), cyclopropenone **2** (0.24 mmol, 1.2 eq.), PdCl<sub>2</sub> (0.5 eq.), Ac<sub>2</sub>O (0.6 mmol, 3.0 eq.), and MeNO<sub>2</sub> (2 mL) were charged into a 15 mL Ace Glass pressure tubes, and the mixture was stirred at 50 °C (metal bath) for 12.0 h until **4** were completely consumed. The mixture was cooled to room temperature, and then EtOAc (15 mL  $\times$  2) were added. The organic phase was washed with water (10 mL), dried over Na<sub>2</sub>SO<sub>4</sub>, concentrated and purified by flash column chromatography to afford 2*H*-pyrrol-2-ones **5**.

#### 3.3 Synthesis of butenolide **7**.

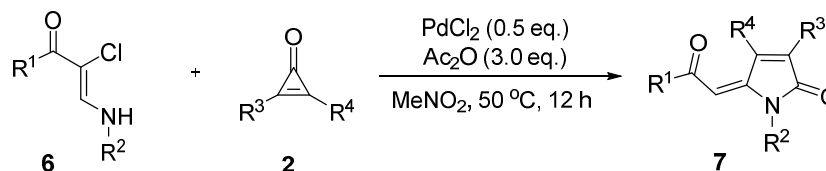

$\alpha$ -Chlorinated enaminones **6** (0.2 mmol), cyclopropenone **2** (0.24 mmol, 1.2 eq.), PdCl<sub>2</sub> (0.5 eq.), Ac<sub>2</sub>O (0.6 mmol, 3.0 eq.), and MeNO<sub>2</sub> (2 mL) were charged into a 15 mL Ace Glass pressure tubes, and the mixture was stirred at 50 °C (metal bath) for 12.0 h until **6** were completely consumed. The mixture was cooled to room temperature, and then EtOAc (15 mL  $\times$  2) were added. The organic phase was washed with water (10 mL),

dried over Na<sub>2</sub>SO<sub>4</sub>, concentrated and purified by flash column chromatography to afford 2*H*-pyrrol-2-ones **7**.

### 3.4 Gram-scale synthesis of butenolide **3a**.

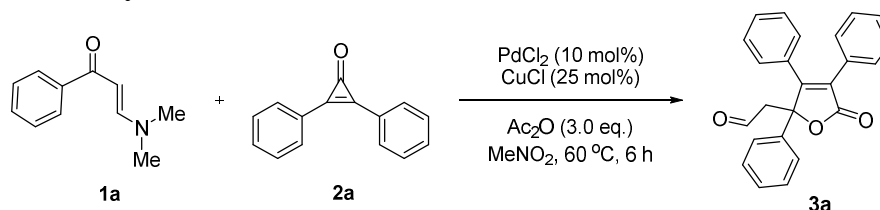

*N,N*-Dimethyl enaminones **1a** (3.0 mmol), cyclopropenone **2a** (3.6 mmol, 1.2 eq.), PdCl<sub>2</sub> (10 mol%), CuCl (25 mol%), Ac<sub>2</sub>O (9.0 mmol, 3.0 eq.), and MeNO<sub>2</sub> (15 mL) were charged into a 75 mL Ace Glass pressure tubes, and the mixture was stirred at 60 °C (metal bath) for 6.0 h until **1a** were completely consumed. The mixture was cooled to room temperature, and then EtOAc (30 mL × 2) were added. The organic phase was washed with water (20 mL), dried over Na<sub>2</sub>SO<sub>4</sub>, concentrated and purified by flash column chromatography to afford  $\gamma$ -butenolide **3a** in 82% yield (0.87 g).

### 3.5 Gram-scale synthesis of butenolide **5b**.

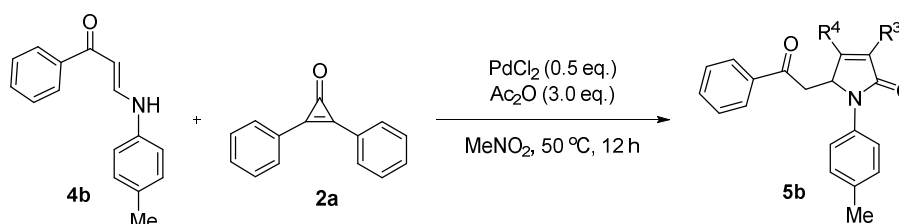

Enaminones **4b** (3.0 mmol), cyclopropenone **2a** (3.6 mmol, 1.2 eq.), PdCl<sub>2</sub> (0.5 eq.), Ac<sub>2</sub>O (9.0 mmol, 3.0 eq.), and MeNO<sub>2</sub> (15 mL) were charged into a 75 mL Ace Glass pressure tubes, and the mixture was stirred at 50 °C (metal bath) for 12.0 h until **4b** were completely consumed. The mixture was cooled to room temperature, and then EtOAc (30 mL × 2) were added. The organic phase was washed with water (20 mL), dried over Na<sub>2</sub>SO<sub>4</sub>, concentrated and purified by flash column chromatography to afford 2*H*-pyrrol-2-ones **5b** in 42% yield (0.56 g).

### 3.6 The Synthetic Applications.

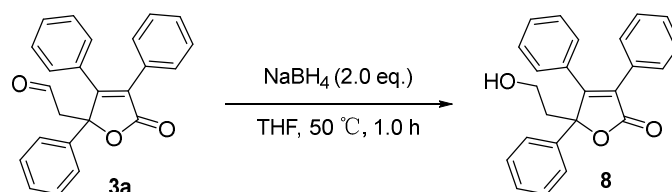

$\gamma$ -Butenolide **3a** (0.2 mmol), NaBH<sub>4</sub> (0.4 mmol, 2.0 eq.), and THF (2 mL) were charged into a 15 mL Ace Glass pressure tubes, and the mixture was stirred at 50 °C (metal bath) for 1.0 h until **3a** were completely consumed. The mixture was cooled to room

temperature, and then EtOAc (10 mL × 2) were added. The organic phase was washed with water (10 mL), dried over Na<sub>2</sub>SO<sub>4</sub>, concentrated and purified by flash column chromatography to afford **8**.

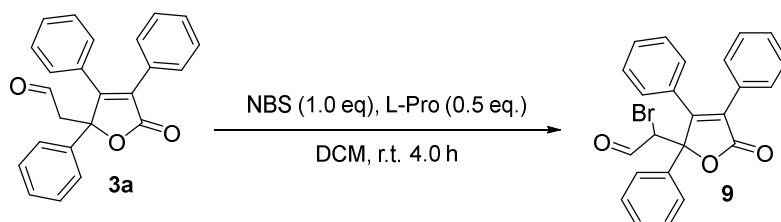

$\gamma$ -Butenolide **3a** (0.2 mmol), NBS (0.2 mmol, 1.0 eq.), L-Pro (0.1 mmol, 0.5 eq.), and DCM (2 mL) were charged into a 15 mL Ace Glass pressure tubes, and the mixture was stirred at room temperature for 4.0 h until **3a** were completely consumed. And then EtOAc (10 mL × 2) were added. The organic phase was washed with water (10 mL), dried over Na<sub>2</sub>SO<sub>4</sub>, concentrated and purified by flash column chromatography to afford **9**.

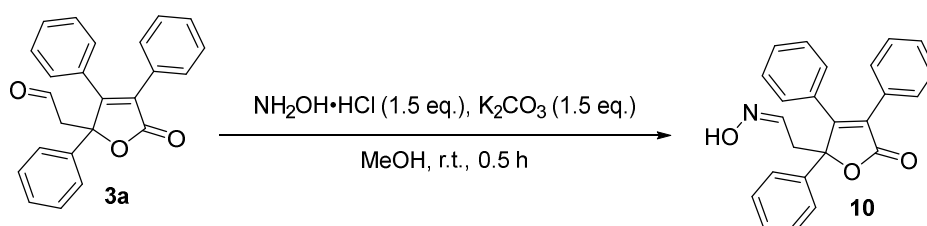

$\gamma$ -Butenolide **3a** (0.2 mmol), NH<sub>2</sub>OH·HCl (0.3 mmol, 1.5 eq.), K<sub>2</sub>CO<sub>3</sub> (0.3 mmol, 1.5 eq.), and MeOH (2 mL) were charged into a 15 mL Ace Glass pressure tubes, and the mixture was stirred at room temperature for 0.5 h until **3a** were completely consumed. And then EtOAc (10 mL × 2) were added. The organic phase was washed with water (10 mL), dried over Na<sub>2</sub>SO<sub>4</sub>, concentrated and purified by flash column chromatography to afford **10**.

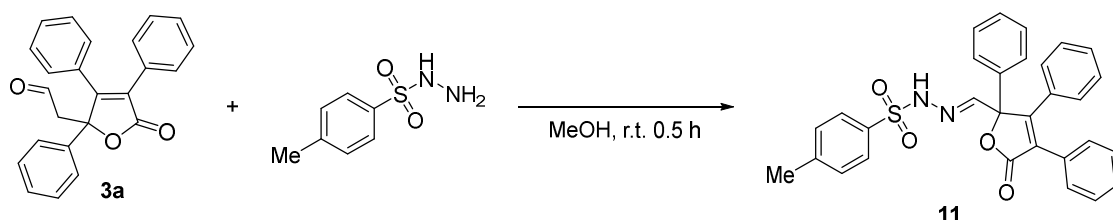

$\gamma$ -Butenolide **3a** (0.2 mmol), 4-methylbenzenesulfonylhydrazide (0.24 mmol, 1.2 eq.), and MeOH (2 mL) were charged into a 15 mL Ace Glass pressure tubes, and the mixture was stirred at room temperature for 0.5 h until **3a** were completely consumed. And then EtOAc (10 mL × 2) were added. The organic phase was washed with water (10 mL),

dried over Na<sub>2</sub>SO<sub>4</sub>, concentrated and purified by flash column chromatography to afford **11**.

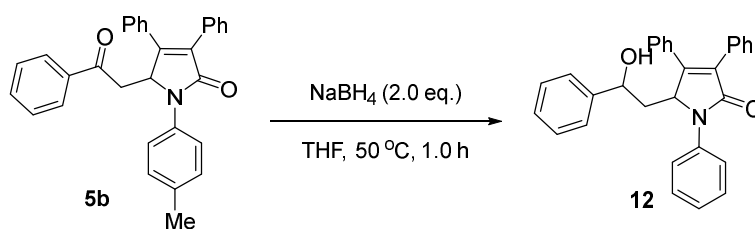

2*H*-Pyrrol-2-ones **5b** (0.2 mmol), NaBH<sub>4</sub> (0.4 mmol, 2.0 eq.), and THF (2 mL) were charged into a 15 mL Ace Glass pressure tubes, and the mixture was stirred at 50 °C (metal bath) for 1.0 h until **5b** were completely consumed. The mixture was cooled to room temperature, and then EtOAc (10 mL × 2) were added. The organic phase was washed with water (10 mL), dried over Na<sub>2</sub>SO<sub>4</sub>, concentrated and purified by flash column chromatography to afford **12**.

### 3.7 H/D Exchange experiment.

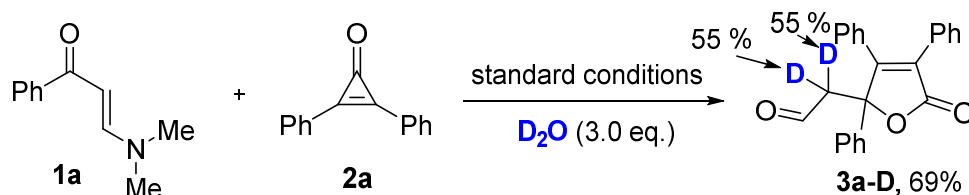

*N,N*-Dimethyl enaminones **1a** (0.2 mmol), cyclopropenone **2a** (0.24 mmol, 1.2 eq.), PdCl<sub>2</sub> (10 mol%), CuCl (25 mol%), D<sub>2</sub>O, (0.6 mmol, 3.0 eq.), Ac<sub>2</sub>O (0.6 mmol, 3.0 eq.), and MeNO<sub>2</sub> (2 mL) were charged into a 15 mL Ace Glass pressure tubes, and the mixture was stirred at 60 °C (metal bath) for 6.0 h until **1a** were completely consumed, and then EtOAc (10 mL × 2) were added. The organic phase was washed with water (10 mL), dried over Na<sub>2</sub>SO<sub>4</sub>, concentrated and purified by flash column chromatography to afford  $\gamma$ -butenolide **3a-D**. The deuterium content in the structure was identified by <sup>1</sup>H NMR.

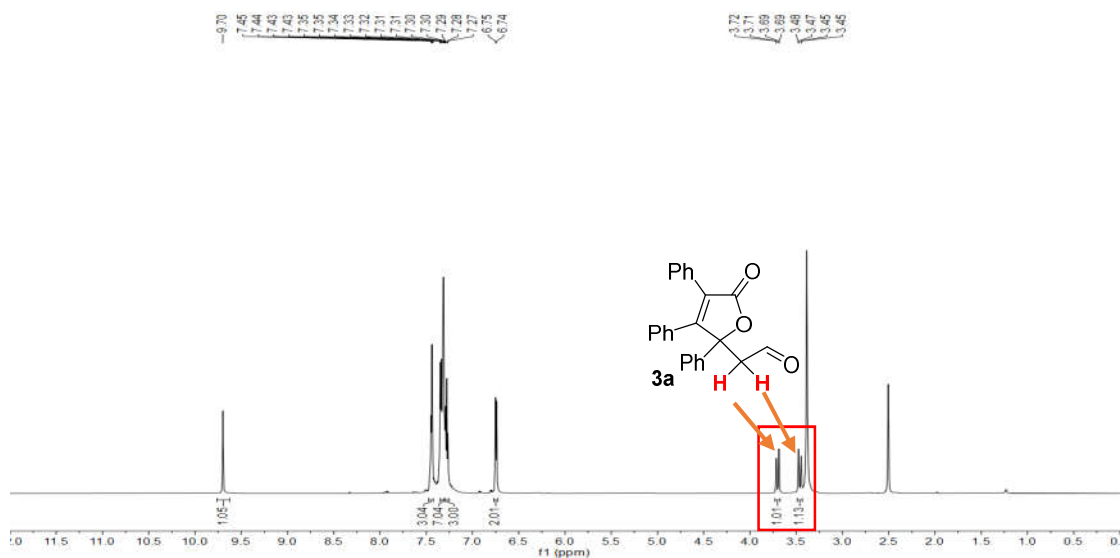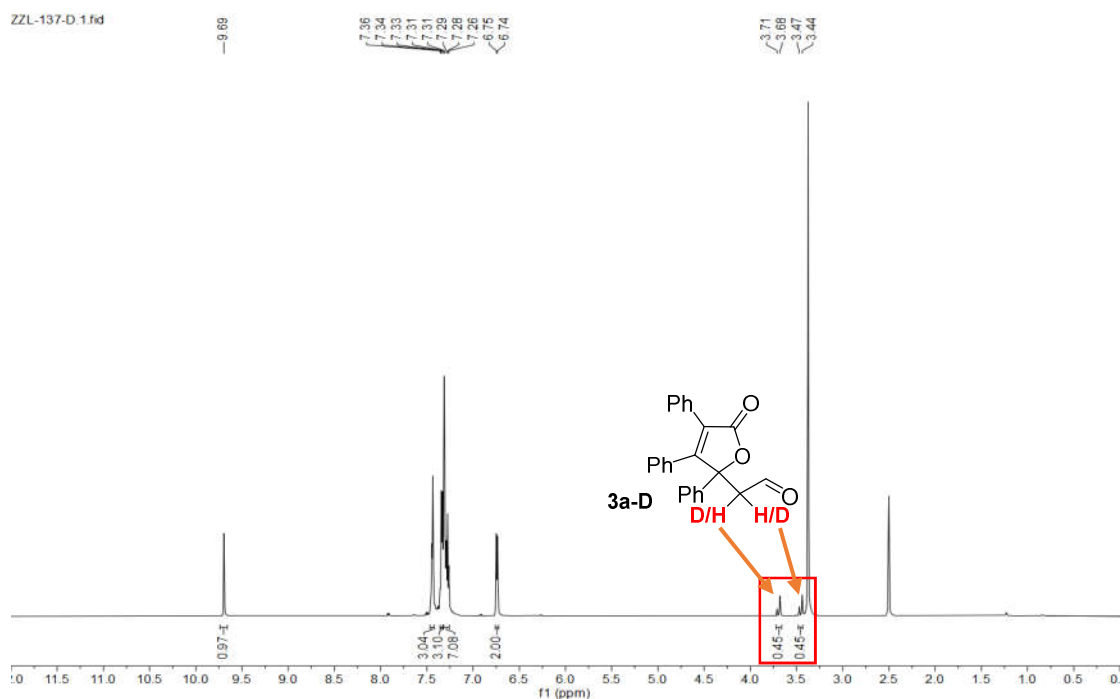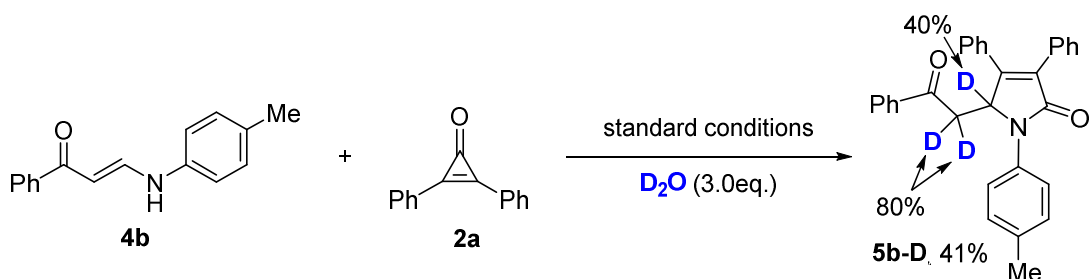

Enaminones **4b** (0.2 mmol), cyclopropenone **2a** (0.24 mmol, 1.2 eq.), PdCl<sub>2</sub> (0.5 eq.), D<sub>2</sub>O, (0.6 mmol, 3.0 eq.), Ac<sub>2</sub>O (0.6 mmol, 3.0 eq.), and MeNO<sub>2</sub> (2 mL) were charged into a 15 mL Ace Glass pressure tubes, and the mixture was stirred at 50 °C (metal bath) for 12.0 h until **4b** were completely consumed, and then EtOAc (10 mL × 2) were added. The organic phase was washed with water (10 mL), dried over Na<sub>2</sub>SO<sub>4</sub>, concentrated

and purified by flash column chromatography to afford 2*H*-pyrrol-2-ones **5b-D**. The deuterium content in the structure was identified by <sup>1</sup>H NMR.

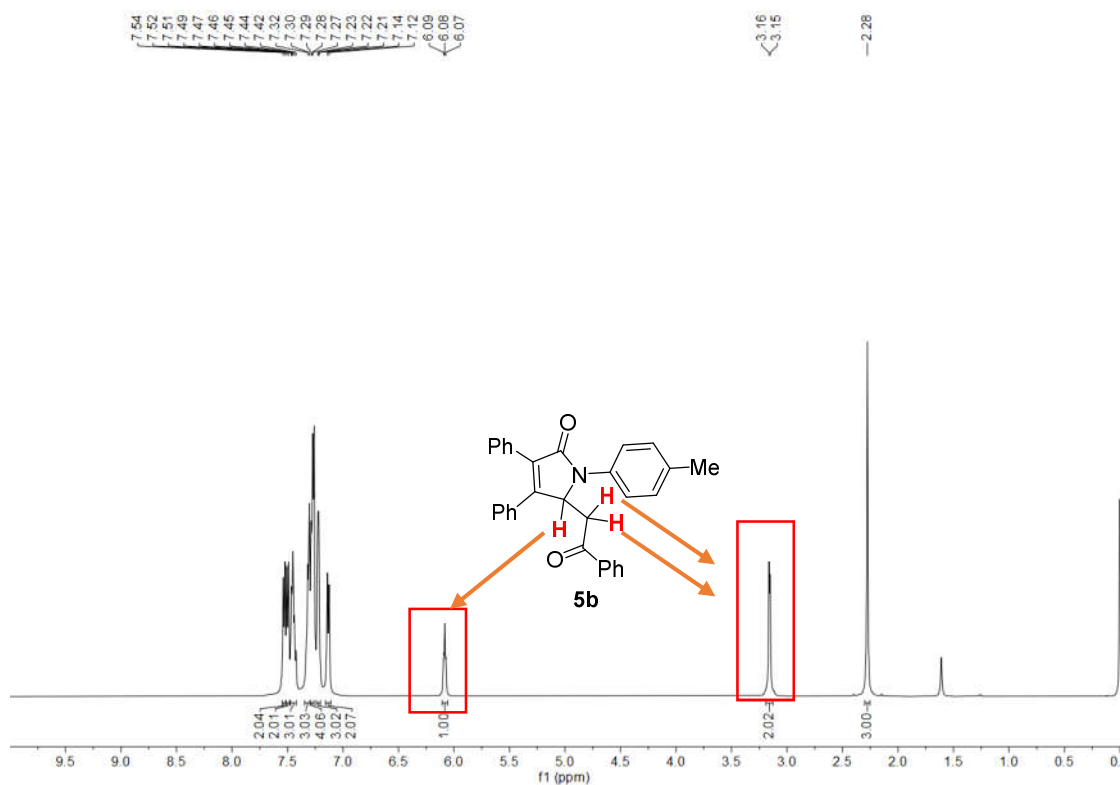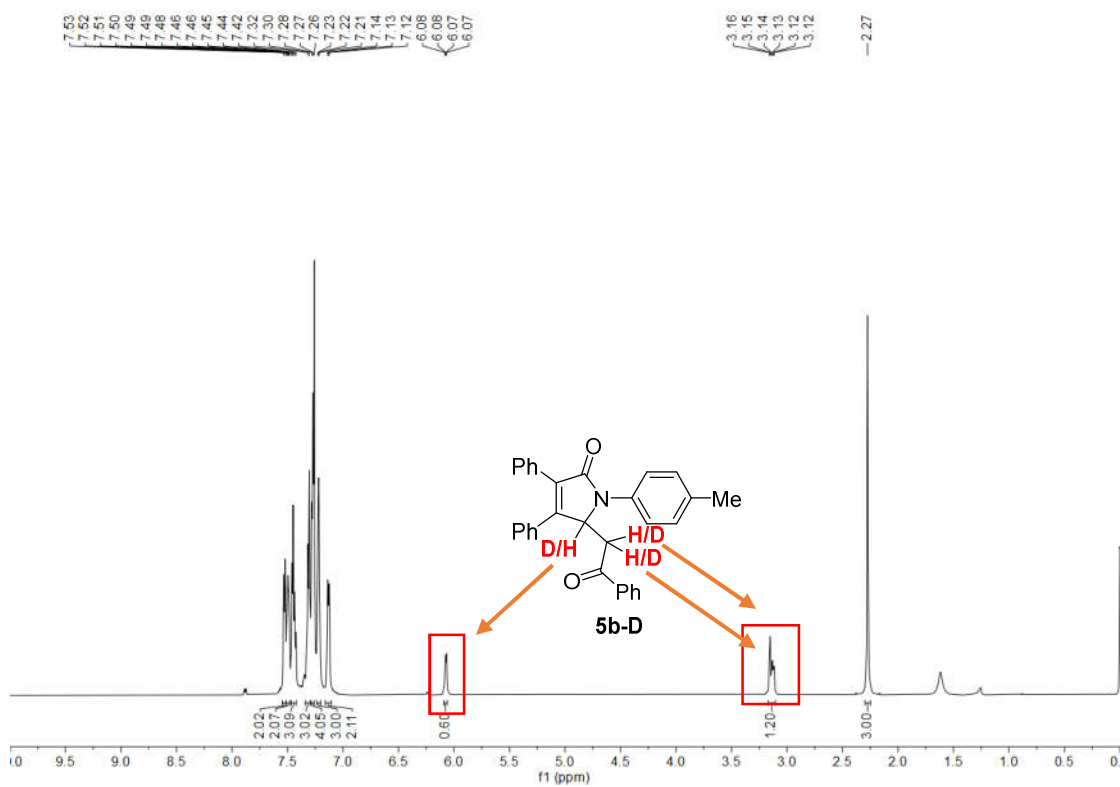

### 3.8 <sup>18</sup>O Labeling experiment.

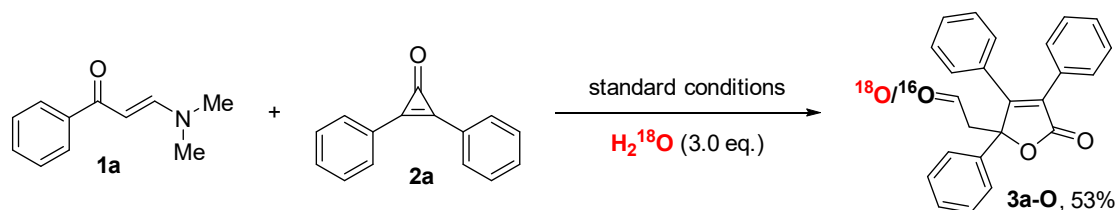

*N,N*-dimethyl enaminones **1a** (0.2 mmol), cyclopropenone **2a** (0.24 mmol, 1.2 eq.),  $\text{PdCl}_2$  (10 mol%),  $\text{CuCl}$  (25 mol%),  $\text{H}_2^{18}\text{O}$  (0.6 mmol, 3.0 eq.),  $\text{Ac}_2\text{O}$  (0.6 mmol, 3.0 eq.), and  $\text{MeNO}_2$  (2 mL) were charged into a 15 mL Ace Glass pressure tubes, and the mixture was stirred at 60 °C (metal bath) for 6.0 h until **1a** were completely consumed, and then  $\text{EtOAc}$  (10 mL  $\times$  2) were added. The organic phase was washed with water (10 mL), dried over  $\text{Na}_2\text{SO}_4$ , concentrated and purified by flash column chromatography to afford  $\gamma$ -butenolide **3a-O**. The  $^{18}\text{O}$  content in the structure was identified by HRMS.

HRMS (TOF ES<sup>+</sup>):  $m/z$  calcd for  $\text{C}_{24}\text{H}_{18}\text{NaO}_2^{18}\text{O}$  [(M+Na)<sup>+</sup>], 379.1191, found, 379.1195.

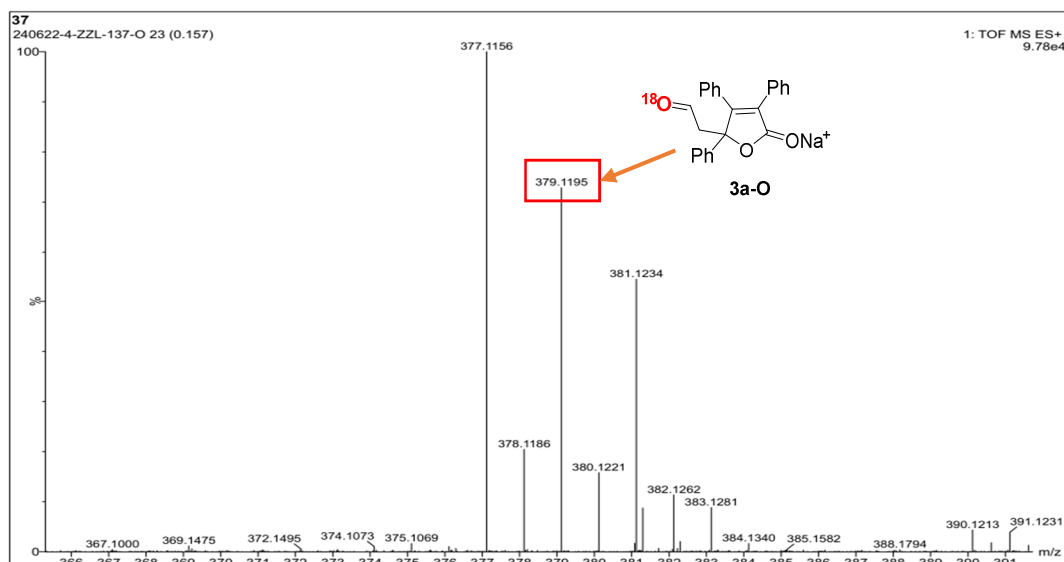

### 3.9 Proposed reaction mechanism

Based on the above experimental results and previous reports,<sup>3</sup> we proposed a possible mechanism for this Pd(II)-catalyzed [3+2] annulation process between *N,N*-dimethyl enaminone **1a** and cyclopropenone **2a**. Initially, cyclopropenone **2a** is complexed with  $\text{CuCl}$  to generate copper complex species **I**, which is attacked by enaminone **1a** through nucleophilic addition to generate intermediate **II**. Subsequently,  $\text{PdCl}_2$  is coordinated with the C=C bond of intermediate **II** to form intermediate **III**. Then the ring opening of **III** via C-C bond activation generates intermediates **IV** along with regeneration of the co-catalyst  $\text{CuCl}$ . **VI** undergoes an intramolecular Heck reaction to give intermediate **V**, which is easily converted to intermediate **VI** via protonation and the

released PdCl<sub>2</sub> is regenerated for the next catalytic cycle. Finally, product **3a** is formed through the hydrolysis of **VI**.

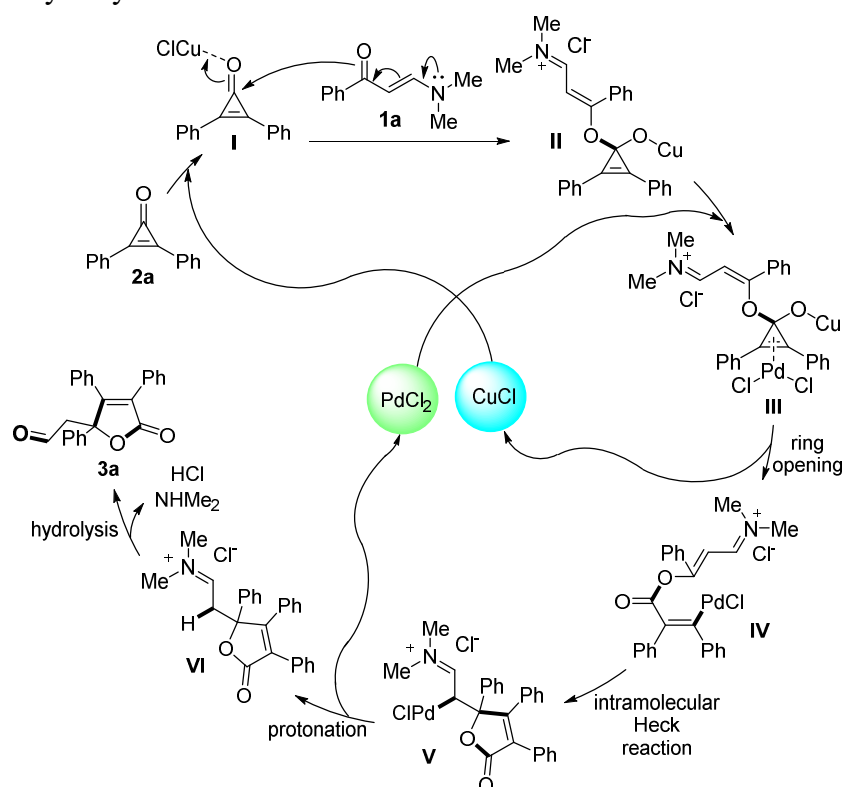

**Scheme S1.** Proposed reaction mechanism of  $\gamma$ -butenolides construction.

Based on the above experimental results and literature reports,<sup>4</sup> we proposed a possible mechanism to describe this Pd(II)-catalyzed [3+2] annulation process between *NH*-substituted enaminone **4a** and cyclopropanone **2a**. Firstly, cyclopropanone **2a** is complexed with PdCl<sub>2</sub> to generate intermediate **I**, which subsequently reacts with *NH*-substituted enaminone **4a** to form intermediate **II**. The intermediate **II** undergoes intramolecular ring-opening/cyclization process to give intermediate **III** and leave a molecule of PdCl<sub>2</sub>. Finally, a keto-enol tautomerism occurs to produce the desired product **5a**.

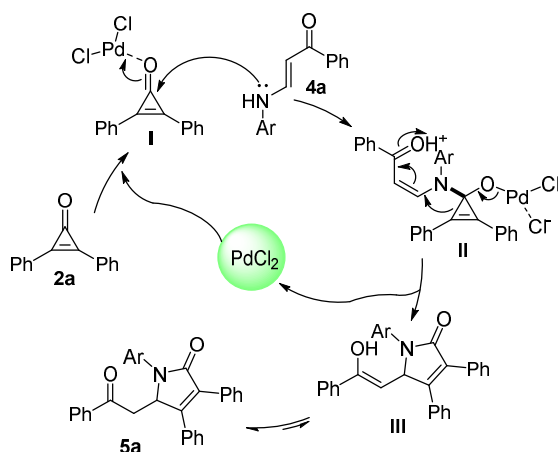

**Scheme S2.** Proposed reaction mechanism of  $\gamma$ -lactams construction.



## 4. Spectroscopic data.

### 2-(5-Oxo-2,3,4-triphenyl-2,5-dihydrofuran-2-yl)acetaldehyde (3a)

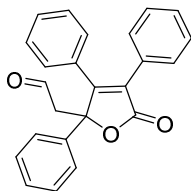

$V_{\text{Petroleum ether}}/V_{\text{Ethyl acetate}} = 4:1$ ,  $R_f = 0.3$ ; Yellow oil: 65 mg (92%);  $^1\text{H NMR}$  (600 MHz,  $\text{DMSO-}d_6$ )  $\delta = 9.70$  (s, 1H), 7.45–7.43 (m, 3H), 7.36–7.30 (m, 7H), 7.29–7.27 (m, 3H), 6.75 (d,  $J = 7.5$  Hz, 2H), 3.70 (dd,  $J = 17.0, 1.9$  Hz, 1H), 3.46 (dd,  $J = 17.1, 1.9$  Hz, 1H);  $^{13}\text{C NMR}$  (150 MHz,  $\text{DMSO-}d_6$ )  $\delta = 199.8, 171.4, 163.9, 136.5, 131.3, 130.0, 129.8, 129.5, 129.5, 129.5, 129.5, 129.5, 129.2, 129.2, 129.2, 128.7, 128.7, 128.5, 128.5, 126.9, 126.4, 126.4, 87.5, 46.7$ ; HRMS (TOF ES<sup>+</sup>):  $m/z$  calcd for  $\text{C}_{24}\text{H}_{19}\text{O}_3$  [(M+H)<sup>+</sup>], 355.1329, found, 355.1338.

### 2-(5-Oxo-3,4-diphenyl-2-(*p*-tolyl)-2,5-dihydrofuran-2-yl)acetaldehyde (3b)

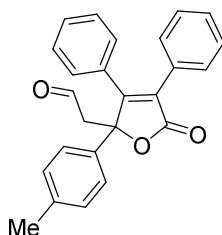

$V_{\text{Petroleum ether}}/V_{\text{Ethyl acetate}} = 4:1$ ,  $R_f = 0.3$ ; Yellow oil: 70 mg (89%);  $^1\text{H NMR}$  (600 MHz,  $\text{DMSO-}d_6$ )  $\delta = 9.68$  (s, 1H), 7.36–7.33 (m, 1H), 7.32–7.22 (m, 11H), 6.76 (d,  $J = 7.0$  Hz, 2H), 3.66 (dd,  $J = 17.0, 2.0$  Hz, 1H), 3.41 (dd,  $J = 17.2, 2.0$  Hz, 1H), 2.33 (s, 3H);  $^{13}\text{C NMR}$  (150 MHz,  $\text{DMSO-}d_6$ )  $\delta = 199.8, 171.4, 163.9, 139.0, 133.5, 131.3, 130.0, 130.0, 130.0, 129.9, 129.5, 129.5, 129.2, 129.2, 129.2, 128.7, 128.7, 128.6, 128.6, 126.8, 126.3, 126.3, 87.5, 46.8, 21.1$ ; HRMS (TOF ES<sup>+</sup>):  $m/z$  calcd for  $\text{C}_{25}\text{H}_{20}\text{NaO}_3$  [(M+Na)<sup>+</sup>], 391.1305, found, 391.1310.

### 2-(5-Oxo-3,4-diphenyl-2-(*o*-tolyl)-2,5-dihydrofuran-2-yl)acetaldehyde (3c)

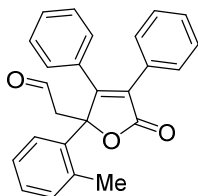

$V_{\text{Petroleum ether}}/V_{\text{Ethyl acetate}} = 4:1$ ,  $R_f = 0.3$ ; Yellow oil: 51 mg (65%);  $^1\text{H NMR}$  (600 MHz,  $\text{DMSO-}d_6$ )  $\delta = 9.73$  (s, 1H), 7.37–7.31 (m, 8H), 7.26–7.22 (m, 4H), 6.70–6.66 (m, 2H), 3.73 (dd,  $J = 17.0, 2.3$  Hz, 1H), 3.32 (dd,  $J = 17.0, 1.9$  Hz, 1H), 2.33 (s, 3H);  $^{13}\text{C NMR}$  (150 MHz,  $\text{DMSO-}d_6$ )  $\delta = 199.9, 171.6, 161.7, 137.2, 133.8, 132.7, 131.2, 130.0, 129.9, 129.6, 129.4, 129.4, 129.3, 129.3, 129.2, 129.2, 128.8, 128.8, 128.4, 128.4, 128.4, 127.0, 89.3, 49.7, 21.1$ ; HRMS (TOF ES<sup>+</sup>):  $m/z$  calcd for  $\text{C}_{25}\text{H}_{20}\text{NaO}_3$  [(M+Na)<sup>+</sup>], 391.1305, found, 391.1306.

**2-(2-(4-Hydroxyphenyl)-5-oxo-3,4-diphenyl-2,5-dihydrofuran-2-yl)acetaldehyde (3d)**

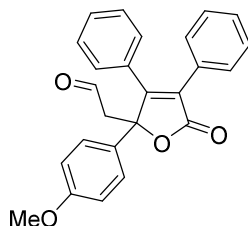

$V_{\text{Petroleum ether}}/V_{\text{Ethyl acetate}} = 4:1$ ,  $R_f = 0.2$ ; Yellow oil: 71 mg (93%);  $^1\text{H NMR}$  (600 MHz,  $\text{DMSO-}d_6$ )  $\delta = 9.69$  (s, 1H), 7.37–7.31 (m, 6H), 7.30–7.27 (m, 4H), 7.00 (d,  $J = 8.5$  Hz, 2H), 6.76 (d,  $J = 7.6$  Hz, 2H), 3.78 (s, 3H), 3.67–3.62 (m, 1H), 3.41–3.39 (m, 1H);  $^{13}\text{C NMR}$  (150 MHz,  $\text{DMSO-}d_6$ )  $\delta = 199.9$ , 171.4, 163.8, 160.0, 131.3, 130.0, 129.9, 129.5, 129.5, 129.2, 129.2, 128.7, 128.7, 128.7, 128.6, 128.6, 128.1, 127.9, 127.9, 126.7, 114.8, 114.8, 87.4, 55.7, 46.8; HRMS (TOF ES<sup>+</sup>):  $m/z$  calcd for  $\text{C}_{25}\text{H}_{21}\text{O}_4$  [(M+H)<sup>+</sup>], 385.1434, found, 385.1444.

**2-(5-Oxo-3,4-diphenyl-2-(3,4,5-trimethoxyphenyl)-2,5-dihydrofuran-2-yl)acetaldehyde (3e)**

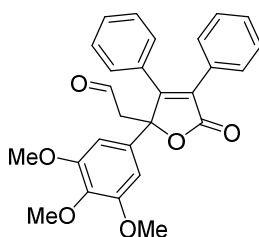

$V_{\text{Petroleum ether}}/V_{\text{Ethyl acetate}} = 2:1$ ,  $R_f = 0.3$ ; Yellow oil: 80 mg (90%);  $^1\text{H NMR}$  (600 MHz,  $\text{DMSO-}d_6$ )  $\delta = 9.68$  (s, 1H), 7.40–7.37 (m, 1H), 7.36–7.30 (m, 7H), 6.86 (d,  $J = 7.5$  Hz, 2H), 6.52 (s, 2H), 3.72 (d,  $J = 17.1$  Hz, 1H), 3.68 (s, 3H), 3.67 (s, 6H), 3.43 (d,  $J = 17.3$  Hz, 1H);  $^{13}\text{C NMR}$  (150 MHz,  $\text{DMSO-}d_6$ )  $\delta = 199.6$ , 170.7, 163.3, 153.0, 153.0, 137.8, 131.7, 131.0, 129.6, 129.5, 129.2, 129.2, 128.8, 128.7, 128.7, 128.4, 128.4, 128.3, 128.3, 126.4, 103.4, 103.4, 87.2, 60.2, 56.0, 56.0, 47.1; HRMS (TOF ES<sup>+</sup>):  $m/z$  calcd for  $\text{C}_{27}\text{H}_{24}\text{NaO}_6$  [(M+Na)<sup>+</sup>], 467.1465, found, 467.1474.

**N-(4-(5-Oxo-2-(2-oxoethyl)-3,4-diphenyl-2,5-dihydrofuran-2-yl)phenyl)acetamide (3f)**

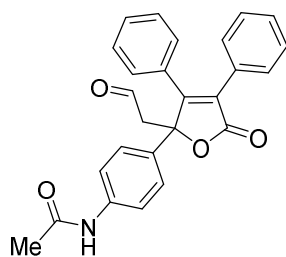

$V_{\text{Petroleum ether}}/V_{\text{Ethyl acetate}} = 1:1$ ,  $R_f = 0.3$ ; Yellow oil: 63 mg (73%);  $^1\text{H NMR}$  (600 MHz,  $\text{DMSO-}d_6$ )  $\delta = 10.14$  (s, 1H), 9.69 (s, 1H), 7.65 (d,  $J = 8.5$  Hz, 2H), 7.34–7.28 (m, 10H),

6.76 (d,  $J = 7.2$  Hz, 2H), 3.64 (d,  $J = 17.0$  Hz, 1H), 3.38–3.37 (m, 1H), 2.06 (s, 3H);  $^{13}\text{C}$  NMR (150 MHz, DMSO- $d_6$ )  $\delta = 199.9, 171.4, 169.1, 163.7, 140.4, 131.3, 130.4, 130.0, 129.9, 129.6, 129.5, 129.5, 129.4, 129.2, 129.2, 128.9, 128.7, 128.7, 128.6, 128.6, 127.1, 126.8, 119.5, 87.4, 46.6, 24.5$ ; HRMS (TOF ES+):  $m/z$  calcd for  $\text{C}_{26}\text{H}_{21}\text{NNaO}_4$  [(M+Na) $^+$ ], 434.1363, found, 434.1370.

**2-(2-(4-Bromophenyl)-5-oxo-3,4-diphenyl-2,5-dihydrofuran-2-yl)acetaldehyde (3g)**

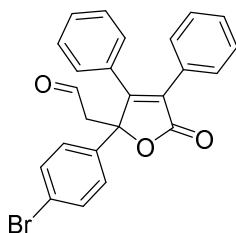

$V_{\text{Petroleum ether}}/V_{\text{Ethyl acetate}} = 4:1$ ,  $R_f = 0.3$ ; colorless oil: 77 mg (89%);  $^1\text{H}$  NMR (600 MHz, DMSO- $d_6$ )  $\delta = 9.67$  (s, 1H), 7.63 (d,  $J = 8.2$  Hz, 2H), 7.36 (t,  $J = 7.4$  Hz, 1H), 7.33–7.27 (m, 9H), 6.79 (d,  $J = 7.2$  Hz, 2H), 3.72 (d,  $J = 17.4$  Hz, 1H), 3.49 (d,  $J = 17.3$  Hz, 1H);  $^{13}\text{C}$  NMR (150 MHz, DMSO- $d_6$ )  $\delta = 199.1, 170.8, 163.2, 135.7, 131.9, 131.9, 130.7, 129.6, 129.3, 129.1, 129.1, 129.1, 128.9, 128.9, 128.9, 128.3, 128.2, 128.2, 128.2, 128.2, 126.6, 122.4, 86.7, 46.3$ ; HRMS (TOF ES+):  $m/z$  calcd for  $\text{C}_{24}\text{H}_{18}\text{BrO}_3$  [(M+H) $^+$ ], 433.0434, found, 433.0441.

**2-(5-Oxo-3,4-diphenyl-2-(4-(trifluoromethyl)phenyl)-2,5-dihydrofuran-2-yl)acetaldehyde (3h)**

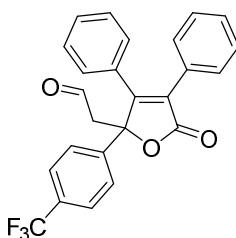

$V_{\text{Petroleum ether}}/V_{\text{Ethyl acetate}} = 4:1$ ,  $R_f = 0.2$ ; Yellow oil: 73 mg (87%);  $^1\text{H}$  NMR (600 MHz, DMSO- $d_6$ )  $\delta = 9.68$  (s, 1H), 7.79 (d,  $J = 8.2$  Hz, 2H), 7.55 (d,  $J = 8.2$  Hz, 2H), 7.37 (t,  $J = 7.5$  Hz, 1H), 7.33–7.30 (m, 7H), 6.78 (d,  $J = 7.6$  Hz, 2H), 3.81 (d,  $J = 18.0$  Hz, 1H), 3.62–3.57 (m, 1H);  $^{13}\text{C}$  NMR (150 MHz, DMSO- $d_6$ )  $\delta = 199.4, 171.2, 163.5, 141.4, 131.0, 130.1, 129.6, 129.6, 129.5, 129.5, 129.3, 129.3, 129.3$  (d,  $J = 34.5$  Hz), 128.7, 128.7, 128.7, 128.6, 128.6, 127.3, 127.3, 126.3 (q,  $J = 3.0$  Hz), 124.4 (d,  $J = 270$  Hz), 87.1, 46.9;  $^{19}\text{F}$  NMR (470 MHz, DMSO- $d_6$ )  $\delta = -61.13$ ; HRMS (TOF ES+):  $m/z$  calcd for  $\text{C}_{25}\text{H}_{17}\text{F}_3\text{NaO}_3$  [(M+Na) $^+$ ], 445.1022, found, 445.1029.

**4-(5-Oxo-2-(2-oxoethyl)-3,4-diphenyl-2,5-dihydrofuran-2-yl)benzotrile (3i)**

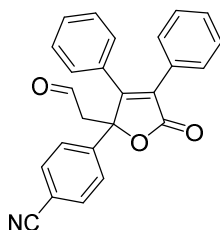

$V_{\text{Petroleum ether}}/V_{\text{Ethyl acetate}} = 4:1$ ,  $R_f = 0.2$ ; Yellow oil: 67 mg (88%);  $^1\text{H NMR}$  (600 MHz,  $\text{DMSO-}d_6$ )  $\delta = 9.66$  (s, 1H), 7.90 (d,  $J = 8.2$  Hz, 2H), 7.51 (d,  $J = 8.3$  Hz, 2H), 7.38 (t,  $J = 7.4$  Hz, 1H), 7.33–7.29 (m, 7H), 6.77 (d,  $J = 7.1$  Hz, 2H), 3.81 (d,  $J = d$ ,  $J = 17.6$  Hz, 1H), 3.59 (dd,  $J = 17.6$  Hz, 1H);  $^{13}\text{C NMR}$  (150 MHz,  $\text{DMSO-}d_6$ )  $\delta = 198.8$ , 170.7, 163.0, 141.7, 132.8, 132.8, 130.5, 129.7, 129.1, 129.1, 129.1, 128.9, 128.9, 128.9, 128.3, 128.3, 128.2, 128.2, 127.0, 127.0, 126.9, 118.4, 111.7, 86.7, 46.3; HRMS (TOF ES+):  $m/z$  calcd for  $\text{C}_{25}\text{H}_{18}\text{NO}_3$   $[(\text{M}+\text{H})^+]$ , 380.1281, found, 380.1286.

**2-(2-(4-(Methylsulfonyl)phenyl)-5-oxo-3,4-diphenyl-2,5-dihydrofuran-2-yl)acetaldehyde (3j)**

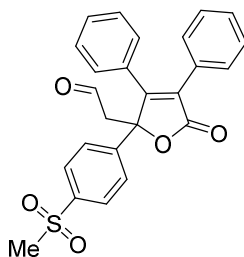

$V_{\text{Petroleum ether}}/V_{\text{Ethyl acetate}} = 1:1$ ,  $R_f = 0.1$ ; Yellow oil: 74 mg (86%);  $^1\text{H NMR}$  (600 MHz,  $\text{DMSO-}d_6$ )  $\delta = 9.68$  (s, 1H), 7.96 (d,  $J = 8.3$  Hz, 2H), 7.60 (d,  $J = 8.3$  Hz, 2H), 7.38 (t,  $J = 7.4$  Hz, 1H), 7.33–7.30 (m, 7H), 6.78 (d,  $J = 7.1$  Hz, 2H), 3.82 (d,  $J = 16.2$  Hz, 1H), 3.60 (d,  $J = 17.6$  Hz, 1H), 3.26 (s, 3H);  $^{13}\text{C NMR}$  (150 MHz,  $\text{DMSO-}d_6$ )  $\delta = 198.9$ , 170.8, 163.0, 142.0, 141.1, 130.5, 129.7, 129.2, 129.2, 129.2, 128.9, 128.9, 128.9, 128.3, 128.3, 128.2, 128.2, 127.6, 127.6, 127.0, 127.0, 127.0, 86.7, 46.5, 43.4; HRMS (TOF ES+):  $m/z$  calcd for  $\text{C}_{25}\text{H}_{21}\text{O}_5\text{S}$   $[(\text{M}+\text{H})^+]$ , 433.1104, found, 433.1112.

**2-(2-(4-Nitrophenyl)-5-oxo-3,4-diphenyl-2,5-dihydrofuran-2-yl)acetaldehyde (3k)**

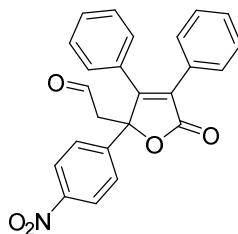

$V_{\text{Petroleum ether}}/V_{\text{Ethyl acetate}} = 2:1$ ,  $R_f = 0.2$ ; Yellow oil: 66 mg (83%);  $^1\text{H NMR}$  (500 MHz,  $\text{CDCl}_3$ )  $\delta = 9.78$  (s, 1H), 8.22 (d,  $J = 8.4$  Hz, 2H), 7.43–7.35 (m, 4H), 7.29 (d,  $J = 26.8$  Hz, 6H), 6.83–6.71 (m, 2H), 3.49 (d,  $J = 16.2$  Hz, 1H), 3.19 (d,  $J = 16.3$  Hz, 1H);  $^{13}\text{C NMR}$  (125 MHz,  $\text{CDCl}_3$ )  $\delta = 197.0$ , 170.5, 162.3, 148.2, 143.4, 130.6, 130.0, 129.4, 129.3, 129.3, 129.1, 129.1, 128.4, 128.4, 128.4, 128.2, 128.2, 127.6, 126.9, 126.9, 124.1,

124.1, 86.4, 48.1; HRMS (TOF ES+):  $m/z$  calcd for  $C_{24}H_{18}NO_5$   $[(M+H)^+]$ , 400.1179, found, 400.1184.

**2-(2-(3-Nitrophenyl)-5-oxo-3,4-diphenyl-2,5-dihydrofuran-2-yl)acetaldehyde (3l)**

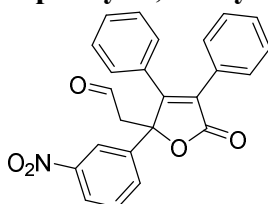

$V_{\text{Petroleum ether}}/V_{\text{Ethyl acetate}} = 4:1$ ,  $R_f = 0.3$ ; Yellow oil: 75 mg (94%);  $^1\text{H NMR}$  (600 MHz,  $\text{DMSO-}d_6$ )  $\delta = 9.67$  (s, 1H), 8.27–8.25 (m, 1H), 8.05 (s, 1H), 7.73–7.68 (m, 2H), 7.38 (t,  $J = 7.5$  Hz, 1H), 7.34–7.29 (m, 7H), 6.82 (d,  $J = 7.2$  Hz, 2H), 3.87 (d,  $J = 17.7$  Hz, 1H), 3.66 (d,  $J = 17.7$  Hz, 1H);  $^{13}\text{C NMR}$  (150 MHz,  $\text{DMSO-}d_6$ )  $\delta = 199.3$ , 171.1, 163.4, 148.5, 139.0, 132.9, 130.9, 130.9, 130.1, 129.5, 129.5, 129.5, 129.4, 129.3, 129.3, 128.7, 128.7, 128.7, 127.3, 124.3, 120.8, 86.9, 47.0; HRMS (TOF ES+):  $m/z$  calcd for  $C_{24}H_{18}NO_5$   $[(M+H)^+]$ , 400.1179, found, 400.1187.

**2-(2-([1,1'-Biphenyl]-4-yl)-5-oxo-3,4-diphenyl-2,5-dihydrofuran-2-yl)acetaldehyde (3m)**

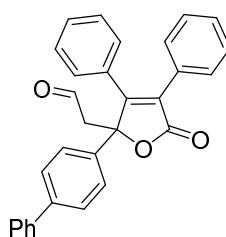

$V_{\text{Petroleum ether}}/V_{\text{Ethyl acetate}} = 4:1$ ,  $R_f = 0.3$ ; Yellow oil: 80 mg (93%);  $^1\text{H NMR}$  (600 MHz,  $\text{DMSO-}d_6$ )  $\delta = 9.73$  (s, 1H), 7.77 (d,  $J = 8.2$  Hz, 2H), 7.72 (d,  $J = 7.9$  Hz, 2H), 7.49 (t,  $J = 7.7$  Hz, 2H), 7.44 (d,  $J = 8.1$  Hz, 2H), 7.41–7.38 (m, 2H), 7.35 (d,  $J = 7.1$  Hz, 2H), 7.33–7.31 (m, 3H), 7.29 (d,  $J = 7.4$  Hz, 2H), 6.82 (d,  $J = 7.6$  Hz, 2H), 3.75 (d,  $J = 17.6$  Hz, 1H), 3.50 (d,  $J = 17.0$  Hz, 1H);  $^{13}\text{C NMR}$  (150 MHz,  $\text{DMSO-}d_6$ )  $\delta = 199.8$ , 171.4, 163.7, 141.0, 139.4, 135.7, 131.3, 130.0, 129.8, 129.6, 129.5, 129.5, 129.5, 129.4, 129.2, 129.2, 128.7, 128.7, 128.7, 128.6, 128.4, 127.6, 127.5, 127.4, 127.2, 127.0, 127.0, 127.0, 87.4, 46.8; HRMS (TOF ES+):  $m/z$  calcd for  $C_{30}H_{23}O_3$   $[(M+H)^+]$ , 431.1642, found, 431.1650.

**2-(2-(Naphthalen-2-yl)-5-oxo-3,4-diphenyl-2,5-dihydrofuran-2-yl)acetaldehyde (3n)**

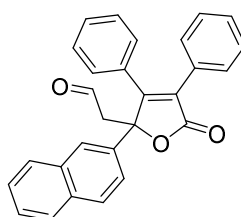

$V_{\text{Petroleum ether}}/V_{\text{Ethyl acetate}} = 4:1$ ,  $R_f = 0.3$ ; Yellow oil: 65 mg (81%);  $^1\text{H NMR}$  (600 MHz,  $\text{DMSO-}d_6$ )  $\delta = 9.76$  (s, 1H), 8.01–7.98 (m, 2H), 7.97–7.94 (m, 2H), 7.61–7.56 (m, 2H), 7.41–7.39 (m, 1H), 7.37–7.36 (m, 2H), 7.33–7.31 (m, 4H), 7.25–7.23 (m, 2H), 6.75 (d,  $J = 7.3$  Hz, 2H), 3.85 (dd,  $J = 17.1, 1.9$  Hz, 1H), 3.56 (dd,  $J = 17.1, 2.1$  Hz, 1H);  $^{13}\text{C NMR}$  (150 MHz,  $\text{DMSO-}d_6$ )  $\delta = 199.8, 171.4, 163.7, 133.8, 133.2, 133.0, 131.3, 130.0, 129.8, 129.6, 129.6, 129.5, 129.3, 129.2, 129.2, 128.9, 128.7, 128.7, 128.5, 128.5, 128.0, 127.6, 127.3, 127.3, 126.1, 123.5, 87.7, 46.8$ ; HRMS (TOF ES+):  $m/z$  calcd for  $\text{C}_{28}\text{H}_{21}\text{O}_3$   $[(\text{M}+\text{H})^+]$ , 405.1485, found, 405.1492.

### 2-(5-Oxo-3,4-diphenyl-2-styryl-2,5-dihydrofuran-2-yl)acetaldehyde (3o)

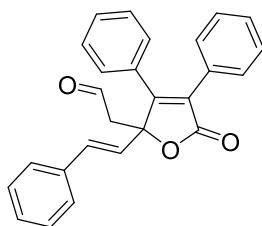

$V_{\text{Petroleum ether}}/V_{\text{Ethyl acetate}} = 4:1$ ,  $R_f = 0.3$ ; Yellow oil: 62 mg (82%);  $^1\text{H NMR}$  (600 MHz,  $\text{DMSO-}d_6$ )  $\delta = 9.71$  (s, 1H), 7.55 (d,  $J = 7.6$  Hz, 2H), 7.41–7.36 (m, 5H), 7.34–7.30 (m, 6H), 7.25 (dd,  $J = 6.5, 2.8$  Hz, 2H), 6.79 (d,  $J = 16.3$  Hz, 1H), 6.59 (d,  $J = 16.2$  Hz, 1H), 3.35–3.32 (m, 1H), 3.15 (dd,  $J = 16.8, 2.3$  Hz, 1H);  $^{13}\text{C NMR}$  (150 MHz,  $\text{DMSO-}d_6$ )  $\delta = 200.0, 171.0, 162.8, 135.9, 132.6, 131.5, 130.0, 130.0, 129.6, 129.6, 129.3, 129.3, 129.2, 129.2, 129.1, 129.0, 128.8, 128.8, 128.7, 128.7, 127.5, 127.5, 127.2, 126.5, 86.8, 46.8$ ; HRMS (TOF ES+):  $m/z$  calcd for  $\text{C}_{26}\text{H}_{20}\text{NaO}_3$   $[(\text{M}+\text{Na})^+]$ , 403.1305, found, 403.1312.

### 2-(2-(Benzo[d][1,3]dioxol-5-yl)-5-oxo-3,4-diphenyl-2,5-dihydrofuran-2-yl)acetaldehyde (3p)

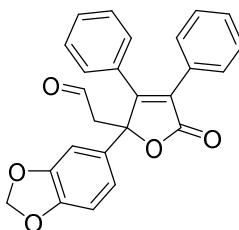

$V_{\text{Petroleum ether}}/V_{\text{Ethyl acetate}} = 4:1$ ,  $R_f = 0.2$ ; Yellow oil: 68 mg (86%);  $^1\text{H NMR}$  (600 MHz,  $\text{DMSO-}d_6$ )  $\delta = 9.67$  (s, 1H), 7.35 (d,  $J = 7.3$  Hz, 1H), 7.33–7.29 (m, 7H), 6.97 (d,  $J = 8.2$  Hz, 1H), 6.91 (s, 1H), 6.85–6.80 (m, 3H), 6.08 (d,  $J = 10.8$  Hz, 2H), 3.65 (d,  $J = 17.0$  Hz, 1H), 3.37–3.34 (m, 1H);  $^{13}\text{C NMR}$  (150 MHz,  $\text{DMSO-}d_6$ )  $\delta = 199.8, 171.3, 163.7, 148.4, 148.2, 131.3, 130.1, 130.0, 129.9, 129.6, 129.6, 129.2, 129.2, 128.7, 128.7, 128.7, 128.6, 128.6, 126.8, 120.5, 108.9, 106.8, 102.1, 87.5, 47.0$ ; HRMS (TOF ES+):  $m/z$  calcd for  $\text{C}_{25}\text{H}_{18}\text{NaO}_5$   $[(\text{M}+\text{Na})^+]$ , 421.1046, found, 421.1053.

### 2-(5-Oxo-3,4-diphenyl-2-(thiophen-2-yl)-2,5-dihydrofuran-2-yl)acetaldehyde (3q)

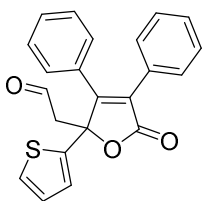

$V_{\text{Petroleum ether}}/V_{\text{Ethyl acetate}} = 4:1$ ,  $R_f = 0.3$ ; Yellow oil: 54 mg (75%);  $^1\text{H NMR}$  (600 MHz,  $\text{DMSO-}d_6$ )  $\delta = 9.69$  (s, 1H), 7.74 (d,  $J = 5.1$  Hz, 1H), 7.37 (d,  $J = 7.5$  Hz, 1H), 7.35–7.30 (m, 7H), 7.23 (d,  $J = 3.6$  Hz, 1H), 7.13–7.09 (m, 1H), 6.85 (d,  $J = 7.6$  Hz, 2H), 3.72 (d,  $J = 17.2$  Hz, 1H), 3.46 (d,  $J = 17.3$  Hz, 1H);  $^{13}\text{C NMR}$  (150 MHz,  $\text{DMSO-}d_6$ )  $\delta = 199.3, 170.6, 162.6, 141.1, 130.9, 130.3, 129.8, 129.5, 129.5, 129.4, 129.3, 129.3, 128.9, 128.9, 128.8, 128.6, 128.6, 128.2, 128.2, 126.6, 85.5, 47.2$ ; HRMS (TOF ES<sup>+</sup>):  $m/z$  calcd for  $\text{C}_{22}\text{H}_{16}\text{NaO}_3\text{S}$  [(M+Na)<sup>+</sup>], 383.0712, found, 383.0722.

### 2-(2-(1H-Indol-3-yl)-5-oxo-3,4-diphenyl-2,5-dihydrofuran-2-yl)acetaldehyde (3r)

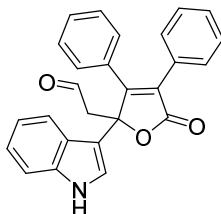

$V_{\text{Petroleum ether}}/V_{\text{Ethyl acetate}} = 1:1$ ,  $R_f = 0.2$ ; Yellow solid: 25 mg (32%); mp = 222–223 °C;  $^1\text{H NMR}$  (600 MHz,  $\text{CDCl}_3$ )  $\delta = 8.96$  (s, 1H), 8.37 (d,  $J = 7.6$  Hz, 1H), 7.75 (s, 1H), 7.45–7.41 (m, 2H), 7.39–7.33 (m, 9H), 7.29–7.28 (m, 2H), 6.27 (d,  $J = 9.0$  Hz, 1H), 3.14 (dd,  $J = 15.9, 9.1$  Hz, 1H), 3.04 (dd,  $J = 16.1, 2.7$  Hz, 1H);  $^{13}\text{C NMR}$  (150 MHz,  $\text{CDCl}_3$ )  $\delta = 190.7, 172.6, 160.6, 136.5, 132.4, 130.7, 130.5, 129.9, 129.5, 129.5, 129.3, 129.3, 128.9, 128.7, 128.7, 128.4, 128.4, 126.8, 125.5, 124.1, 123.1, 122.4, 117.9, 111.7, 78.3, 43.0$ ; HRMS (TOF ES<sup>+</sup>):  $m/z$  calcd for  $\text{C}_{26}\text{H}_{20}\text{NO}_3$  [(M+H)<sup>+</sup>], 394.1438, found, 394.1439.

### 2-(2-((3r,5r,7r)-Adamantan-1-yl)-5-oxo-3,4-diphenyl-2,5-dihydrofuran-2-yl)acetaldehyde (3s)

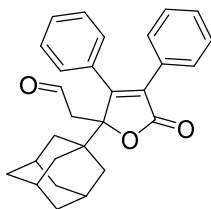

$V_{\text{Petroleum ether}}/V_{\text{Ethyl acetate}} = 4:1$ ,  $R_f = 0.4$ ; Yellow oil: 59 mg (71%);  $^1\text{H NMR}$  (600 MHz,  $\text{DMSO-}d_6$ )  $\delta = 7.42$ –7.35 (m, 6H), 7.31–7.28 (m, 4H), 6.07 (dd,  $J = 8.8, 2.9$  Hz, 1H), 2.99 (dd,  $J = 17.8, 8.8$  Hz, 1H), 2.63 (dd,  $J = 17.8, 3.0$  Hz, 1H), 1.94–1.90 (m, 3H), 1.68–1.57 (m, 12H);  $^{13}\text{C NMR}$  (150 MHz,  $\text{DMSO-}d_6$ )  $\delta = 211.0, 172.1, 161.5, 131.0, 130.6, 130.5, 129.5, 129.5, 129.4, 129.4, 129.0, 128.9, 128.9, 128.7, 128.7, 126.1, 78.1, 46.3, 38.8, 37.3, 37.3, 37.3, 36.3, 36.3, 27.6, 27.6, 27.6, 27.6$ ; HRMS (TOF ES<sup>+</sup>):  $m/z$  calcd for  $\text{C}_{28}\text{H}_{28}\text{NaO}_3$  [(M+Na)<sup>+</sup>], 435.1931, found, 435.1939.

### 2-(2-Ferrocenyl-5-oxo-3,4-diphenyl-2,5-dihydrofuran-2-yl)acetaldehyde (3t)

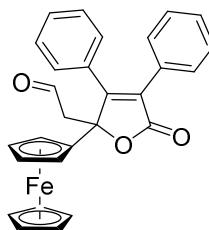

$V_{\text{Petroleum ether}}/V_{\text{Ethyl acetate}} = 4:1$ ,  $R_f = 0.3$ ; Yellow oil: 53 mg (57%);  $^1\text{H NMR}$  (600 MHz,  $\text{DMSO-}d_6$ )  $\delta = 9.83$  (s, 1H), 7.36–7.32 (m, 1H), 7.30–7.27 (m, 5H), 7.25–7.24 (m, 2H), 6.81 (d,  $J = 7.0$  Hz, 2H), 4.38–4.37 (m, 1H), 4.28 (s, 6H), 4.25–4.22 (m, 1H), 4.13–4.09 (m, 1H), 3.60 (d,  $J = 16.8$  Hz, 1H), 3.24 (d,  $J = 15.1$  Hz, 1H);  $^{13}\text{C NMR}$  (150 MHz,  $\text{DMSO-}d_6$ )  $\delta = 200.2$ , 171.1, 163.6, 131.6, 130.0, 129.9, 129.5, 129.5, 129.1, 129.1, 129.0, 128.7, 128.7, 128.5, 128.5, 126.2, 88.5, 86.2, 69.7, 69.6, 69.6, 69.6, 69.6, 69.6, 68.7, 68.6, 64.8, 47.4; HRMS (TOF ES<sup>+</sup>):  $m/z$  calcd for  $\text{C}_{28}\text{H}_{23}\text{FeO}_3$  [(M+H)<sup>+</sup>], 463.0991, found, 463.0967.

### 2-(5-Oxo-2,3,4-triphenyl-2,5-dihydrofuran-2-yl)-2-phenylacetaldehyde (3u)

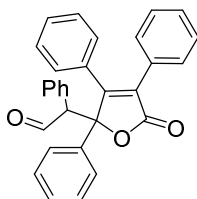

$V_{\text{Petroleum ether}}/V_{\text{Ethyl acetate}} = 8:1$ ,  $R_f = 0.3$ ; White solid: 43 mg (50%); mp = 200–201 °C;  $^1\text{H NMR}$  (600 MHz,  $\text{DMSO-}d_6$ )  $\delta = 7.89$  (d,  $J = 7.9$  Hz, 2H), 7.55 (t,  $J = 7.3$  Hz, 1H), 7.43–7.40 (m, 2H), 7.35–7.31 (m, 3H), 7.28–7.23 (m, 4H), 7.14–7.11 (m, 1H), 7.06–7.01 (m, 7H), 6.47 (d,  $J = 7.8$  Hz, 1H), 5.21 (d,  $J = 7.8$  Hz, 1H);  $^{13}\text{C NMR}$  (150 MHz,  $\text{DMSO-}d_6$ )  $\delta = 196.2$ , 171.5, 161.0, 135.6, 133.7, 133.4, 131.1, 130.0, 129.6, 129.6, 129.2, 129.2, 129.2, 128.9, 128.9, 128.6, 128.6, 128.5, 128.4, 128.4, 128.4, 128.4, 128.3, 128.3, 128.1, 128.1, 127.5, 127.0, 82.2, 54.7; HRMS (TOF ES<sup>+</sup>):  $m/z$  calcd for  $\text{C}_{30}\text{H}_{23}\text{O}_3$  [(M+H)<sup>+</sup>], 431.1642, found, 431.1646.

### 5-(2-Oxopropyl)-3,4,5-triphenylfuran-2(5H)-one (3v)

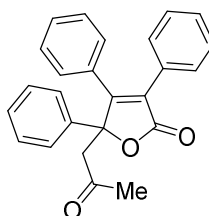

$V_{\text{Petroleum ether}}/V_{\text{Ethyl acetate}} = 4:1$ ,  $R_f = 0.3$ ; White solid: 42 mg (54%); mp = 155–156 °C;  $^1\text{H NMR}$  (600 MHz,  $\text{DMSO-}d_6$ )  $\delta = 7.43$ –7.39 (m, 3H), 7.34–7.25 (m, 10H), 6.73–6.66 (m, 2H), 3.75 (d,  $J = 17.1$  Hz, 1H), 3.55 (d,  $J = 17.2$  Hz, 1H), 2.15 (s, 3H);  $^{13}\text{C NMR}$  (150 MHz,  $\text{DMSO-}d_6$ )  $\delta = 204.6$ , 171.9, 164.1, 137.4, 131.6, 130.1, 129.8, 129.4, 129.4, 129.2, 129.2, 129.1, 129.1, 129.0, 129.0, 128.7, 128.7, 128.6, 128.6, 126.7, 126.1, 126.1,



87.7, 45.8, 31.9; HRMS (TOF ES<sup>+</sup>): *m/z* calcd for C<sub>25</sub>H<sub>20</sub>NaO<sub>3</sub> [(M+H)<sup>+</sup>], 391.1305, found, 391.1312.

**2-(5-Oxo-2-phenyl-3,4-di-*p*-tolyl-2,5-dihydrofuran-2-yl)acetaldehyde (3w)**

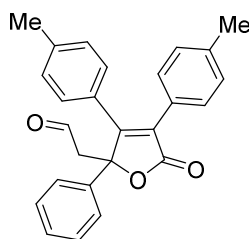

V<sub>Petroleum ether</sub>/V<sub>Ethyl acetate</sub> = 4:1, R<sub>f</sub> = 0.3; Yellow oil: 68 mg (89%); <sup>1</sup>H NMR (600 MHz, DMSO-*d*<sub>6</sub>) δ = 9.68 (s, 1H), 7.46–7.42 (m, 3H), 7.34 (d, *J* = 6.7 Hz, 2H), 7.22 (d, *J* = 7.9 Hz, 2H), 7.12 (d, *J* = 7.9 Hz, 2H), 7.08 (d, *J* = 7.9 Hz, 2H), 6.64 (d, *J* = 7.9 Hz, 2H), 3.68 (dd, *J* = 17.0, 2.0 Hz, 1H), 3.41 (dd, *J* = 17.3, 2.1 Hz, 1H), 2.26 (s, 3H), 2.24 (s, 3H); <sup>13</sup>C NMR (150 MHz, DMSO-*d*<sub>6</sub>) δ = 199.8, 171.6, 163.3, 139.6, 138.7, 136.8, 129.8, 129.8, 129.5, 129.5, 129.4, 129.4, 129.4, 129.4, 129.3, 129.3, 128.5, 128.4, 127.1, 126.5, 126.3, 126.3, 87.4, 46.8, 21.3, 21.3; HRMS (TOF ES<sup>+</sup>): *m/z* calcd for C<sub>26</sub>H<sub>22</sub>NaO<sub>3</sub> [(M+Na)<sup>+</sup>], 405.1461, found, 405.1465.

**2-(3,4-Bis(4-fluorophenyl)-5-oxo-2-phenyl-2,5-dihydrofuran-2-yl)acetaldehyde (3x)**

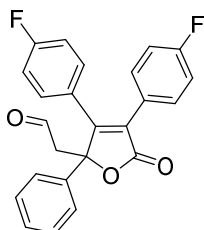

V<sub>Petroleum ether</sub>/V<sub>Ethyl acetate</sub> = 4:1, R<sub>f</sub> = 0.3; Yellow oil: 60 mg (77%); <sup>1</sup>H NMR (500 MHz, DMSO-*d*<sub>6</sub>) δ = 9.69 (s, 1H), 7.46–7.44 (m, 3H), 7.39–7.35 (m, 4H), 7.21–7.15 (m, 4H), 6.82–6.77 (m, 2H), 3.71 (dd, *J* = 17.1, 1.9 Hz, 1H), 3.47 (dd, *J* = 17.1, 2.0 Hz, 1H); <sup>13</sup>C NMR (125 MHz, DMSO-*d*<sub>6</sub>) δ = 199.8, 171.2, 163.0 (d, *J* = 246.3 Hz), 162.8, 162.6 (d, *J* = 246.3 Hz), 136.3, 131.8 (d, *J* = 8.4 Hz), 131.8 (d, *J* = 8.4 Hz), 131.0 (d, *J* = 8.6 Hz), 131.0 (d, *J* = 8.6 Hz), 129.6, 129.6, 129.5, 127.4 (d, *J* = 3.3 Hz), 126.4, 126.4, 126.4, 126.1 (d, *J* = 3.3 Hz), 116.5 (d, *J* = 21.9 Hz), 116.5 (d, *J* = 21.9 Hz), 115.9 (d, *J* = 21.6 Hz), 115.9 (d, *J* = 21.6 Hz), 87.6, 46.6; <sup>19</sup>F NMR (470 MHz, DMSO-*d*<sub>6</sub>) δ = -111.01, -111.87; HRMS (TOF ES<sup>+</sup>): *m/z* calcd for C<sub>24</sub>H<sub>17</sub>F<sub>2</sub>O<sub>3</sub> [(M+H)<sup>+</sup>], 391.1140, found, 391.1146.

**2-(3,4-Bis(4-chlorophenyl)-5-oxo-2-phenyl-2,5-dihydrofuran-2-yl)acetaldehyde (3y)**

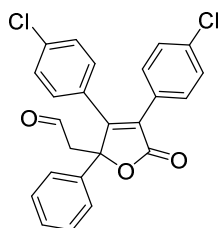

$V_{\text{Petroleum ether}}/V_{\text{Ethyl acetate}} = 4:1$ ,  $R_f = 0.3$ ; Yellow oil: 63 mg (75%);  $^1\text{H NMR}$  (600 MHz,  $\text{DMSO-}d_6$ )  $\delta = 9.68$  (s, 1H), 7.45–7.42 (m, 5H), 7.40 (d,  $J = 8.3$  Hz, 2H), 7.36–7.33 (m, 4H), 6.75 (d,  $J = 8.2$  Hz, 2H), 3.72 (d,  $J = 17.7$  Hz, 1H), 3.49 (d,  $J = 17.5$  Hz, 1H);  $^{13}\text{C NMR}$  (150 MHz,  $\text{DMSO-}d_6$ )  $\delta = 199.8$ , 171.0, 163.0, 136.1, 135.0, 134.2, 131.4, 131.4, 130.4, 130.4, 129.8, 129.7, 129.5, 129.5, 129.5, 129.5, 129.0, 129.0, 129.0, 128.4, 126.4, 126.4, 87.6, 46.5; HRMS (TOF ES<sup>+</sup>):  $m/z$  calcd for  $\text{C}_{24}\text{H}_{17}\text{Cl}_2\text{O}_3$  [(M+H)<sup>+</sup>], 423.0549, found, 423.0556.

**2-(3,4-Bis(3-chlorophenyl)-5-oxo-2-phenyl-2,5-dihydrofuran-2-yl)acetaldehyde (3z)**

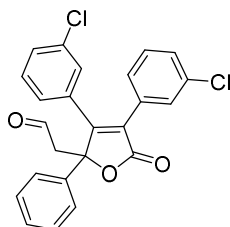

$V_{\text{Petroleum ether}}/V_{\text{Ethyl acetate}} = 4:1$ ,  $R_f = 0.3$ ; Yellow oil: 62 mg (74%);  $^1\text{H NMR}$  (600 MHz,  $\text{DMSO-}d_6$ )  $\delta = 9.69$  (s, 1H), 7.47–7.45 (m, 4H), 7.42 (dd,  $J = 8.1$ , 2.2 Hz, 1H), 7.38–7.33 (m, 5H), 7.20 (d,  $J = 7.8$  Hz, 1H), 6.75 (s, 1H), 6.69 (d,  $J = 7.8$  Hz, 1H), 3.72 (d,  $J = 1.9$  Hz, 1H), 3.50 (d,  $J = 17.3$  Hz, 1H);  $^{13}\text{C NMR}$  (150 MHz,  $\text{DMSO-}d_6$ )  $\delta = 199.8$ , 170.8, 163.2, 135.7, 133.8, 133.4, 132.8, 131.5, 131.2, 130.7, 130.1, 129.7, 129.5, 129.5, 129.3, 129.3, 128.2, 128.1, 127.4, 126.5, 126.5, 126.5, 87.8, 46.5; HRMS (TOF ES<sup>+</sup>):  $m/z$  calcd for  $\text{C}_{24}\text{H}_{17}\text{Cl}_2\text{O}_3$  [(M+Na)<sup>+</sup>], 423.0549, found, 423.0556.

**2-(3,4-Bis(4-bromophenyl)-5-oxo-2-phenyl-2,5-dihydrofuran-2-yl)acetaldehyde (3a')**

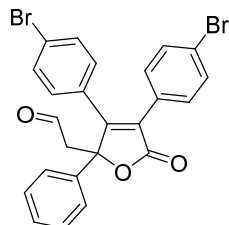

$V_{\text{Petroleum ether}}/V_{\text{Ethyl acetate}} = 4:1$ ,  $R_f = 0.3$ ; Yellow oil: 63 mg (62%);  $^1\text{H NMR}$  (600 MHz,  $\text{DMSO-}d_6$ )  $\delta = 9.67$  (s, 1H), 7.56 (d,  $J = 8.2$  Hz, 2H), 7.53 (d,  $J = 8.1$  Hz, 2H), 7.46–7.44 (m, 3H), 7.35 (d,  $J = 8.1$  Hz, 2H), 7.27 (d,  $J = 8.2$  Hz, 2H), 6.67 (d,  $J = 8.2$  Hz, 2H), 3.72 (d,  $J = 17.2$  Hz, 1H), 3.48 (d,  $J = 16.2$  Hz, 1H);  $^{13}\text{C NMR}$  (150 MHz,  $\text{DMSO-}d_6$ )  $\delta = 199.8$ , 170.9, 163.1, 136.1, 132.4, 132.4, 131.9, 131.9, 131.6, 131.6, 130.6, 130.6,

130.2, 129.7, 129.5, 129.5, 128.8, 126.5, 126.4, 126.4, 123.9, 123.0, 87.6, 46.5; HRMS (TOF ES<sup>+</sup>): m/z calcd for C<sub>24</sub>H<sub>17</sub>Br<sub>2</sub>O<sub>3</sub> [(M+H)<sup>+</sup>], 510.9539, found, 510.9542.

**2-(4-Ethyl-5-oxo-2,3-diphenyl-2,5-dihydrofuran-2-yl)acetaldehyde (3b')**

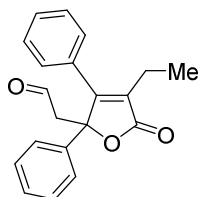

V<sub>Petroleum ether</sub>/V<sub>Ethyl acetate</sub> = 4:1, R<sub>f</sub> = 0.3; Yellow oil: 50 mg (82%); <sup>1</sup>H NMR (600 MHz, DMSO-*d*<sub>6</sub>) δ = 9.65 (s, 1H), 7.51–4.46 (m, 8H), 7.44–7.41 (m, 2H), 3.84 (dd, *J* = 16.9, 2.4 Hz, 1H), 3.45 (dd, *J* = 16.9, 1.9 Hz, 1H), 2.44–2.36 (m, 2H), 0.60 (t, *J* = 7.6 Hz, 3H); <sup>13</sup>C NMR (150 MHz, DMSO-*d*<sub>6</sub>) δ = 200.1, 172.0, 169.2, 137.3, 130.4, 129.5, 129.5, 129.3, 129.2, 129.2, 129.1, 128.9, 128.9, 126.0, 126.0, 125.8, 87.7, 46.9, 19.5, 12.3; HRMS (TOF ES<sup>+</sup>): m/z calcd for C<sub>20</sub>H<sub>18</sub>NaO<sub>3</sub> [(M+Na)<sup>+</sup>], 329.1148, found, 329.1153.

**5-(2-Oxo-2-phenylethyl)-1,3,4-triphenyl-1,5-dihydro-2H-pyrrol-2-one (5a)**

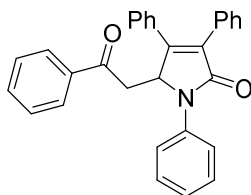

V<sub>Petroleum ether</sub>/V<sub>Ethyl acetate</sub> = 4:1, R<sub>f</sub> = 0.3; White solid: 55 mg (64%); mp = 196–197 °C; <sup>1</sup>H NMR (500 MHz, CDCl<sub>3</sub>) δ = 7.65 (d, *J* = 7.9 Hz, 2H), 7.55–7.51 (m, 2H), 7.47–7.41 (m, 3H), 7.36–7.26 (m, 9H), 7.24–7.19 (m, 3H), 7.11 (t, *J* = 7.4 Hz, 1H), 6.12 (t, *J* = 4.9 Hz, 1H), 3.20–3.14 (m, 2H); <sup>13</sup>C NMR (125 MHz, CDCl<sub>3</sub>) δ = 197.2, 168.6, 153.1, 137.0, 136.6, 133.3, 132.5, 132.0, 131.3, 130.0, 130.0, 129.4, 129.2, 129.2, 129.1, 129.1, 128.9, 128.9, 128.5, 128.5, 128.4, 128.4, 128.3, 127.9, 127.9, 125.3, 122.9, 122.9, 58.6, 40.1; HRMS (TOF ES<sup>+</sup>): m/z calcd for C<sub>30</sub>H<sub>23</sub>NNaO<sub>2</sub> [(M+Na)<sup>+</sup>], 452.1621, found, 452.1626.

**5-(2-Oxo-2-phenylethyl)-3,4-diphenyl-1-(*p*-tolyl)-1,5-dihydro-2H-pyrrol-2-one (5b)**

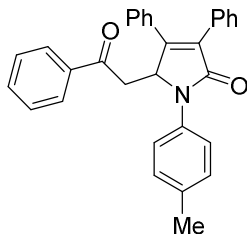

V<sub>Petroleum ether</sub>/V<sub>Ethyl acetate</sub> = 4:1, R<sub>f</sub> = 0.3; Yellow solid: 58 mg (65%); mp = 200–201 °C; <sup>1</sup>H NMR (500 MHz, CDCl<sub>3</sub>) δ = 7.53 (d, *J* = 7.8 Hz, 2H), 7.50 (d, *J* = 8.0 Hz, 2H), 7.47–7.42 (m, 3H), 7.32–7.30 (m, 3H), 7.29–7.26 (m, 4H), 7.24–7.20 (m, 3H), 7.13 (d, *J* = 8.0 Hz, 2H), 6.08 (t, *J* = 4.9 Hz, 1H), 3.16 (d, *J* = 5.0 Hz, 2H), 2.28 (s, 3H); <sup>13</sup>C

NMR (125 MHz, CDCl<sub>3</sub>)  $\delta$  = 197.1, 168.4, 152.8, 136.5, 135.0, 134.1, 133.1, 132.4, 131.9, 131.2, 129.8, 129.8, 129.7, 129.7, 129.2, 128.9, 128.9, 128.7, 128.7, 128.3, 128.3, 128.2, 128.2, 128.1, 127.8, 127.8, 123.0, 123.0, 58.6, 40.0, 20.9; HRMS (TOF ES<sup>+</sup>):  $m/z$  calcd for C<sub>31</sub>H<sub>25</sub>NNaO<sub>2</sub> [(M+Na)<sup>+</sup>], 466.1778, found, 466.1782.

**1-(3,5-Dimethylphenyl)-5-(2-oxo-2-phenylethyl)-3,4-diphenyl-1,5-dihydro-2H-pyrrol-2-one (5c)**

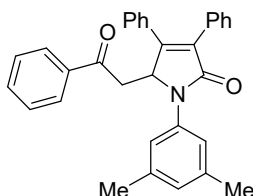

V<sub>Petroleum ether</sub>/V<sub>Ethyl acetate</sub> = 4:1, R<sub>f</sub> = 0.3; White solid: 44 mg (48%); mp = 158–159 °C; <sup>1</sup>H NMR (500 MHz, CDCl<sub>3</sub>)  $\delta$  = 7.53 (d,  $J$  = 7.2 Hz, 2H), 7.47–7.41 (m, 3H), 7.33–7.28 (m, 7H), 7.25–7.20 (m, 5H), 6.73 (s, 1H), 6.04 (t,  $J$  = 5.0 Hz, 1H), 3.17 (dd,  $J$  = 16.8, 4.7 Hz, 1H), 3.12 (dd,  $J$  = 16.8, 5.3 Hz, 1H), 2.25 (s, 6H); <sup>13</sup>C NMR (125 MHz, CDCl<sub>3</sub>)  $\delta$  = 197.3, 168.6, 152.9, 138.8, 138.8, 136.7, 133.2, 133.2, 132.6, 132.2, 131.4, 130.0, 130.0, 129.3, 129.1, 129.1, 128.9, 128.9, 128.4, 128.4, 128.3, 128.3, 128.2, 127.9, 127.9, 127.3, 121.2, 121.2, 59.2, 40.1, 21.5, 21.5; HRMS (TOF ES<sup>+</sup>):  $m/z$  calcd for C<sub>32</sub>H<sub>27</sub>NNaO<sub>2</sub> [(M+Na)<sup>+</sup>], 480.1934, found, 480.1940.

**1-(4-Methoxyphenyl)-5-(2-oxo-2-phenylethyl)-3,4-diphenyl-1,5-dihydro-2H-pyrrol-2-one (5d)**

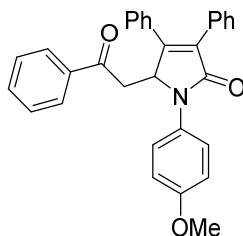

V<sub>Petroleum ether</sub>/V<sub>Ethyl acetate</sub> = 4:1, R<sub>f</sub> = 0.3; Yellow solid: 61 mg (66%); mp = 177–178 °C; <sup>1</sup>H NMR (600 MHz, CDCl<sub>3</sub>)  $\delta$  = 7.54 (d,  $J$  = 7.8 Hz, 2H), 7.48–7.42 (m, 5H), 7.33–7.23 (m, 7H), 7.25–7.22 (m, 3H), 6.84 (d,  $J$  = 8.5 Hz, 2H), 6.04 (t,  $J$  = 5.0 Hz, 1H), 3.75 (s, 3H), 3.18–3.08 (m, 2H); <sup>13</sup>C NMR (150 MHz, CDCl<sub>3</sub>)  $\delta$  = 197.1, 168.5, 157.3, 152.6, 136.5, 133.2, 132.4, 132.0, 131.3, 129.8, 129.8, 129.6, 129.2, 128.9, 128.9, 128.8, 128.8, 128.4, 128.4, 128.3, 128.3, 128.1, 127.8, 127.8, 125.2, 125.2, 114.3, 114.3, 59.1, 55.4, 40.1; HRMS (TOF ES<sup>+</sup>):  $m/z$  calcd for C<sub>31</sub>H<sub>25</sub>NNaO<sub>3</sub> [(M+Na)<sup>+</sup>], 482.1727, found, 482.1727.

**5-(2-Oxo-2-phenylethyl)-3,4-diphenyl-1-(4-(trifluoromethoxy)phenyl)-1,5-dihydro-2H-pyrrol-2-one (5e)**

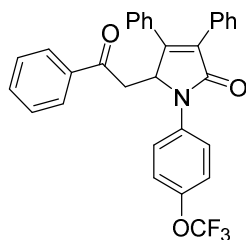

$V_{\text{Petroleum ether}}/V_{\text{Ethyl acetate}} = 4:1$ ,  $R_f = 0.3$ ; Yellow solid: 64 mg (62%); mp = 172–173 °C;  $^1\text{H NMR}$  (600 MHz,  $\text{CDCl}_3$ )  $\delta = 7.68$  (d,  $J = 8.6$  Hz, 2H), 7.54 (d,  $J = 7.8$  Hz, 2H), 7.47–7.44 (m, 3H), 7.35–7.32 (m, 3H), 7.30–7.27 (m, 4H), 7.25–7.22 (m, 3H), 7.18 (d,  $J = 8.6$  Hz, 2H), 6.10 (t,  $J = 5.0$  Hz, 1H), 3.22–3.12 (m, 2H);  $^{13}\text{C NMR}$  (150 MHz,  $\text{CDCl}_3$ )  $\delta = 197.1, 168.6, 153.2, 146.0, 136.3, 135.4, 133.5, 133.5, 132.2, 131.6, 130.9, 129.8, 129.8, 129.5, 128.9, 128.9, 128.9, 128.9, 128.5, 128.5, 128.3, 128.3, 128.3, 127.8, 127.8, 123.9, 123.9, 121.8, 121.8, 58.5, 40.0$ ;  $^{19}\text{F NMR}$  (470 MHz,  $\text{CDCl}_3$ )  $\delta = -57.99$ ; HRMS (TOF ES<sup>+</sup>): m/z calcd for  $\text{C}_{31}\text{H}_{22}\text{F}_3\text{NNaO}_3$  [(M+Na)<sup>+</sup>], 536.1444, found, 536.1453.

**1-(4-Ethylphenyl)-5-(2-oxo-2-phenylethyl)-3,4-diphenyl-1,5-dihydro-2H-pyrrol-2-one (5f)**

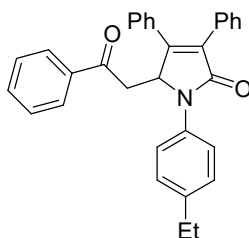

$V_{\text{Petroleum ether}}/V_{\text{Ethyl acetate}} = 4:1$ ,  $R_f = 0.3$ ; White solid: 65 mg (71%); mp = 195–196 °C;  $^1\text{H NMR}$  (600 MHz,  $\text{CDCl}_3$ )  $\delta = 7.53$ –7.50 (m, 4H), 7.47–7.41 (m, 3H), 7.33–7.31 (m, 3H), 7.29–7.27 (m, 3H), 7.26–7.21 (m, 4H), 7.15 (d,  $J = 8.1$  Hz, 2H), 6.08 (t,  $J = 5.0$  Hz, 1H), 3.19–3.11 (m, 2H), 2.57 (q,  $J = 7.6$  Hz, 2H), 1.17 (t,  $J = 7.6$  Hz, 3H);  $^{13}\text{C NMR}$  (150 MHz,  $\text{CDCl}_3$ )  $\delta = 197.3, 168.5, 152.9, 141.5, 136.6, 134.4, 133.3, 132.5, 132.1, 131.3, 129.9, 129.9, 129.3, 129.0, 129.0, 128.8, 128.8, 128.6, 128.6, 128.4, 128.4, 128.3, 128.3, 128.2, 127.9, 127.9, 123.2, 123.2, 58.9, 40.1, 28.4, 15.6$ ; HRMS (TOF ES<sup>+</sup>): m/z calcd for  $\text{C}_{32}\text{H}_{27}\text{NNaO}_2$  [(M+Na)<sup>+</sup>], 480.1934, found, 480.1934.

**1-(4-Isopropylphenyl)-5-(2-oxo-2-phenylethyl)-3,4-diphenyl-1,5-dihydro-2H-pyrrol-2-one (5g)**

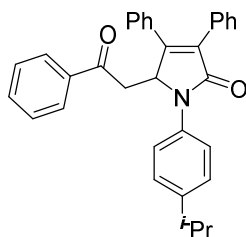

$V_{\text{Petroleum ether}}/V_{\text{Ethyl acetate}} = 4:1$ ,  $R_f = 0.3$ ; White solid: 63 mg (67%); mp = 194–195 °C;  $^1\text{H NMR}$  (500 MHz,  $\text{CDCl}_3$ )  $\delta = 7.53$ –7.48 (m, 4H), 7.48–7.45 (m, 2H), 7.44–7.40 (m, 1H), 7.33–7.27 (m, 6H), 7.25–7.21 (m, 4H), 7.17 (d,  $J = 8.4$  Hz, 2H), 6.07 (t,  $J = 5.0$

Hz, 1H), 3.19–3.10 (m, 2H), 2.86–2.80 (m, 1H), 1.2 (d,  $J = 7.0$  Hz, 6H);  $^{13}\text{C}$  NMR (125 MHz,  $\text{CDCl}_3$ )  $\delta = 197.4, 168.5, 152.9, 146.1, 136.8, 134.5, 133.2, 132.6, 132.2, 131.4, 130.0, 130.0, 129.3, 129.1, 129.1, 128.9, 128.9, 128.4, 128.4, 128.3, 128.3, 128.2, 127.9, 127.9, 127.2, 127.2, 123.3, 123.3, 59.2, 40.2, 33.8, 24.1, 24.0$ ; HRMS (TOF ES<sup>+</sup>):  $m/z$  calcd for  $\text{C}_{33}\text{H}_{29}\text{NNaO}_2$  [(M+Na)<sup>+</sup>], 494.2091, found, 494.2097.

**1-(4-Fluorophenyl)-5-(2-oxo-2-phenylethyl)-3,4-diphenyl-1,5-dihydro-2H-pyrrol-2-one (5h)**

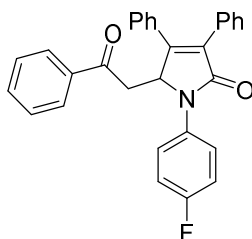

$V_{\text{Petroleum ether}}/V_{\text{Ethyl acetate}} = 4:1$ ,  $R_f = 0.3$ ; White solid: 51 mg (57%); mp = 173–174 °C;  $^1\text{H}$  NMR (500 MHz,  $\text{CDCl}_3$ )  $\delta = 7.59\text{--}7.53$  (m, 4H), 7.48–7.44 (m, 3H), 7.33–7.30 (m, 3H), 7.29–7.27 (m, 3H), 7.26–7.23 (m, 4H), 7.05–6.98 (m, 2H), 6.07 (t,  $J = 5.0$  Hz, 1H), 3.15 (d,  $J = 5.0$  Hz, 2H);  $^{13}\text{C}$  NMR (125 MHz,  $\text{CDCl}_3$ )  $\delta = 197.0, 168.5, 160.1$  ( $J = 243.8$  Hz), 152.9, 136.4, 133.4, 132.8 (d,  $J = 2.5$  Hz), 132.3, 131.8, 131.0, 129.8, 129.8, 129.4, 128.8, 128.8, 128.8, 128.8, 128.4, 128.4, 128.3, 128.3, 128.3, 128.3, 127.8, 125.1 (d,  $J = 8.8$  Hz), 125.1 (d,  $J = 8.8$  Hz), 115.8 (d,  $J = 22.5$  Hz), 115.8 (d,  $J = 22.5$  Hz), 58.8, 40.0;  $^{19}\text{F}$  NMR (470 MHz,  $\text{CDCl}_3$ )  $\delta = -116.6$ ; HRMS (TOF ES<sup>+</sup>):  $m/z$  calcd for  $\text{C}_{30}\text{H}_{22}\text{FNNaO}_2$  [(M+Na)<sup>+</sup>], 470.1527, found, 470.1530.

**1-([1,1'-Biphenyl]-4-yl)-5-(2-oxo-2-phenylethyl)-3,4-diphenyl-1,5-dihydro-2H-pyrrol-2-one (5i)**

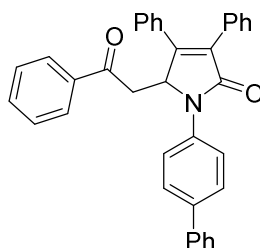

$V_{\text{Petroleum ether}}/V_{\text{Ethyl acetate}} = 4:1$ ,  $R_f = 0.3$ ; Yellow solid: 56 mg (55%); mp = 179–180 °C;  $^1\text{H}$  NMR (500 MHz,  $\text{CDCl}_3$ )  $\delta = 7.73$  (d,  $J = 8.2$  Hz, 2H), 7.59–7.52 (m, 6H), 7.47 (d,  $J = 5.4$  Hz, 2H), 7.44–7.40 (m, 3H), 7.35–7.28 (m, 8H), 7.25–7.24 (m, 3H), 6.15 (t,  $J = 4.9$  Hz, 1H), 3.22 (d,  $J = 4.9$  Hz, 2H);  $^{13}\text{C}$  NMR (125 MHz,  $\text{CDCl}_3$ )  $\delta = 197.3, 168.7, 153.2, 140.6, 138.0, 136.6, 136.2, 133.4, 132.5, 132.0, 131.3, 130.0, 130.0, 129.4, 129.1, 129.1, 128.9, 128.9, 128.9, 128.9, 128.5, 128.5, 128.4, 128.4, 128.3, 127.9, 127.9, 127.9, 127.9, 127.3, 127.1, 127.1, 123.1, 123.1, 58.7, 40.2$ ; HRMS (TOF ES<sup>+</sup>):  $m/z$  calcd for  $\text{C}_{36}\text{H}_{27}\text{NNaO}_2$  [(M+Na)<sup>+</sup>], 528.1934, found, 528.1942.

**1-(4-Hydroxyphenyl)-5-(2-oxo-2-phenylethyl)-3,4-diphenyl-1,5-dihydro-2H-pyrrol-2-one (5j)**

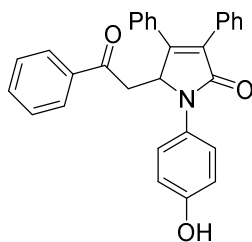

$V_{\text{Petroleum ether}}/V_{\text{Ethyl acetate}} = 1:1$ ,  $R_f = 0.2$ ; Yellow solid: 42 mg (47%); mp = 206–207 °C;  $^1\text{H NMR}$  (500 MHz,  $\text{CDCl}_3$ )  $\delta = 7.53\text{--}7.49$  (m, 2H), 7.47–7.44 (m, 2H), 7.43–7.41 (m, 1H), 7.35–7.30 (m, 3H), 7.28–7.26 (m, 3H), 7.25–7.24 (m, 5H), 7.17 (d,  $J = 8.6$  Hz, 2H), 6.58 (d,  $J = 8.7$  Hz, 2H), 5.94 (t,  $J = 5.1$  Hz, 1H), 3.21–3.03 (m, 2H);  $^{13}\text{C NMR}$  (125 MHz,  $\text{CDCl}_3$ )  $\delta = 196.9, 169.4, 154.8, 153.1, 136.5, 133.2, 132.3, 132.0, 131.1, 129.8, 129.8, 129.2, 128.8, 128.8, 128.8, 128.8, 128.4, 128.4, 128.4, 128.3, 128.3, 128.2, 127.7, 127.7, 126.5, 126.5, 116.4, 116.4, 60.2, 39.8$ ; HRMS (TOF ES<sup>+</sup>):  $m/z$  calcd for  $\text{C}_{30}\text{H}_{23}\text{NNaO}_3$  [(M+Na)<sup>+</sup>], 468.1570, found, 468.1577.

**4,7,7-Trimethyl-3-oxo-*N*-(4-(2-oxo-5-(2-oxo-2-(*p*-tolyl)ethyl)-3,4-diphenyl-2,5-dihydro-1*H*-pyrrol-1-yl)phenyl)-2-oxabicyclo[2.2.1]heptane-1-carboxamide (5k)**

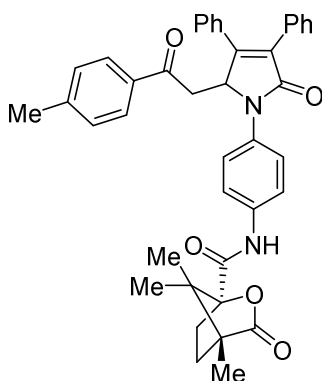

$V_{\text{Petroleum ether}}/V_{\text{Ethyl acetate}} = 4:1$ ,  $R_f = 0.3$ ; Yellow oil: 82 mg (64%);  $^1\text{H NMR}$  (600 MHz,  $\text{DMSO-}d_6$ )  $\delta = 9.86$  (s, 1H), 7.73 (d,  $J = 8.6$  Hz, 2H), 7.54 (dd,  $J = 9.0, 2.6$  Hz, 2H), 7.43 (d,  $J = 7.9$  Hz, 2H), 7.35–7.32 (m, 3H), 7.31–7.26 (m, 7H), 7.09 (d,  $J = 7.9$  Hz, 2H), 6.15 (t,  $J = 4.7$  Hz, 1H), 3.28–3.24 (m, 1H), 3.14 (dd,  $J = 17.2, 4.1$  Hz, 1H), 2.49–2.47 (m, 1H), 2.26 (s, 3H), 2.03–2.00 (m, 1H), 1.93–1.88 (m, 1H), 1.61–1.59 (m, 1H), 1.05 (s, 6H), 0.91 (s, 3H);  $^{13}\text{C NMR}$  (150 MHz,  $\text{DMSO-}d_6$ )  $\delta = 196.6, 178.5, 168.4, 165.7, 153.7, 144.0, 135.3, 135.2, 134.5, 133.4, 132.5, 131.9, 131.9, 129.9, 129.9, 129.5, 129.4, 129.4, 129.1, 129.0, 129.0, 128.6, 128.6, 128.4, 128.2, 128.2, 123.5, 123.5, 121.8, 121.7, 92.3, 59.1, 55.0, 54.1, 38.1, 30.5, 28.9, 21.5, 17.0, 16.8, 10.1$ ; HRMS (TOF ES<sup>+</sup>):  $m/z$  calcd for  $\text{C}_{41}\text{H}_{38}\text{N}_2\text{NaO}_5$  [(M+Na)<sup>+</sup>], 661.2673, found, 661.2681.

**1-Butyl-5-(2-oxo-2-phenylethyl)-3,4-diphenyl-1,5-dihydro-2*H*-pyrrol-2-one (5l)**

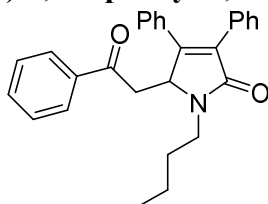

$V_{\text{Petroleum ether}}/V_{\text{Ethyl acetate}} = 4:1$ ,  $R_f = 0.4$ ; White solid: 30 mg (37%); mp = 142–143 °C;  $^1\text{H NMR}$  (500 MHz,  $\text{CDCl}_3$ )  $\delta = 7.8$  (d,  $J = 7.2$  Hz, 2H), 7.56 (t,  $J = 7.4$  Hz, 1H), 7.45–7.39 (m, 4H), 7.30–7.27 (m, 6H), 7.24–7.21 (m, 2H), 5.50 (dd,  $J = 7.9, 2.8$  Hz, 1H), 3.90–3.85 (m, 1H), 3.21–3.16 (m, 1H), 3.05–2.93 (m, 2H), 1.70–1.61 (m, 1H), 1.57–1.49 (m, 1H), 1.35–1.24 (m, 2H), 0.89 (t,  $J = 7.4$  Hz, 3H);  $^{13}\text{C NMR}$  (125 MHz,  $\text{CDCl}_3$ )  $\delta = 197.4, 170.0, 152.2, 136.5, 133.8, 132.6, 131.7, 129.9, 129.9, 129.2, 129.0, 129.0, 128.9, 128.9, 128.9, 128.9, 128.3, 128.3, 128.2, 128.2, 128.1, 57.3, 41.3, 41.1, 30.6, 20.3, 20.3, 13.9$ ; HRMS (TOF ES<sup>+</sup>): m/z calcd for  $\text{C}_{28}\text{H}_{27}\text{NNaO}_2$  [(M+Na)<sup>+</sup>], 432.1934, found, 432.1938.

**5-(2-Oxo-2-(*o*-tolyl)ethyl)-3,4-diphenyl-1-(*p*-tolyl)-1,5-dihydro-2H-pyrrol-2-one (5m)**

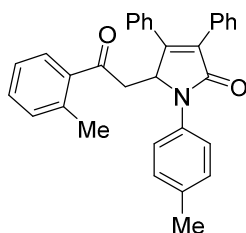

$V_{\text{Petroleum ether}}/V_{\text{Ethyl acetate}} = 4:1$ ,  $R_f = 0.3$ ; White solid: 39 mg (43%); mp = 159–160 °C;  $^1\text{H NMR}$  (500 MHz,  $\text{CDCl}_3$ )  $\delta = 7.52$  (d,  $J = 8.5$  Hz, 2H), 7.47–7.42 (m, 2H), 7.34–7.27 (m, 8H), 7.24–7.22 (m, 1H), 7.18 (d,  $J = 8.2$  Hz, 2H), 7.10 (d,  $J = 7.6$  Hz, 1H), 7.02–6.99 (m, 1H), 6.97–6.95 (m, 1H), 6.07 (t,  $J = 4.8$  Hz, 1H), 3.11 (dd,  $J = 4.8, 2.9$  Hz, 2H), 2.32 (s, 3H), 2.22 (s, 3H);  $^{13}\text{C NMR}$  (125 MHz,  $\text{CDCl}_3$ )  $\delta = 200.5, 168.6, 152.9, 138.1, 137.4, 135.2, 134.4, 132.6, 132.3, 131.8, 131.6, 131.4, 130.0, 130.0, 129.9, 129.9, 129.4, 129.0, 129.0, 128.9, 128.9, 128.4, 128.4, 128.3, 128.2, 125.6, 123.1, 123.1, 58.3, 43.1, 21.1, 20.9$ ; HRMS (TOF ES<sup>+</sup>): m/z calcd for  $\text{C}_{32}\text{H}_{27}\text{NNaO}_2$  [(M+Na)<sup>+</sup>], 480.1934, found, 480.1934.

**5-(2-(4-Methoxyphenyl)-2-oxoethyl)-3,4-diphenyl-1-(*p*-tolyl)-1,5-dihydro-2H-pyrrol-2-one (5n)**

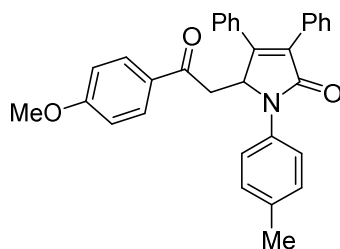

$V_{\text{Petroleum ether}}/V_{\text{Ethyl acetate}} = 4:1$ ,  $R_f = 0.3$ ; White solid: 57 mg (60%); mp = 180–181 °C;  $^1\text{H NMR}$  (500 MHz,  $\text{CDCl}_3$ )  $\delta = 7.55$ –7.49 (m, 4H), 7.48–7.44 (m, 2H), 7.34–7.27 (m, 5H), 7.23–7.20 (m, 3H), 7.13 (d,  $J = 8.0$  Hz, 2H), 6.73 (d,  $J = 8.8$  Hz, 2H), 6.07 (t,  $J = 5.0$  Hz, 1H), 3.79 (s, 3H), 3.10 (d,  $J = 5.0$  Hz, 2H), 2.28 (s, 3H);  $^{13}\text{C NMR}$  (125 MHz,  $\text{CDCl}_3$ )  $\delta = 195.5, 168.6, 163.7, 153.2, 135.0, 134.4, 132.5, 132.2, 131.5, 130.3, 130.3, 130.0, 130.0, 129.8, 129.8, 129.8, 129.3, 129.1, 129.1, 128.8, 128.8, 128.3, 128.3, 128.2, 123.1, 123.1, 113.6, 113.6, 58.9, 55.6, 39.8, 21.0$ ; HRMS (TOF ES<sup>+</sup>): m/z calcd for  $\text{C}_{32}\text{H}_{27}\text{NNaO}_3$  [(M+Na)<sup>+</sup>], 496.1883, found, 496.1887.



**5-(2-Oxo-2-(4-(trifluoromethoxy)phenyl)ethyl)-3,4-diphenyl-1-(*p*-tolyl)-1,5-dihydro-2*H*-pyrrol-2-one (5o)**

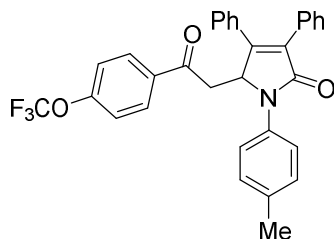

$V_{\text{Petroleum ether}}/V_{\text{Ethyl acetate}} = 4:1$ ,  $R_f = 0.3$ ; Yellow solid: 64 mg (61%); mp = 140–141 °C;  $^1\text{H NMR}$  (500 MHz,  $\text{CDCl}_3$ )  $\delta = 7.55$  (d,  $J = 8.9$  Hz, 2H), 7.47–7.44 (m, 4H), 7.33–7.29 (m, 3H), 7.27–7.26 (m, 2H), 7.24–7.20 (m, 3H), 7.12 (d,  $J = 8.1$  Hz, 2H), 7.08 (d,  $J = 8.4$  Hz, 2H), 6.01 (t,  $J = 5.1$  Hz, 1H), 3.12 (d,  $J = 4.9$  Hz, 2H), 2.27 (s, 3H);  $^{13}\text{C NMR}$  (125 MHz,  $\text{CDCl}_3$ )  $\delta = 195.7, 168.3, 152.4, 135.2, 134.7, 134.1, 132.6, 132.0, 131.1, 129.8, 129.8, 129.8, 129.8, 129.8, 129.8, 129.7, 129.3, 128.9, 128.9, 128.9, 128.8, 128.8, 128.2, 128.2, 128.2, 123.2, 123.2, 120.0, 120.0, 59.1, 39.8, 20.9$ ;  $^{19}\text{F NMR}$  (470 MHz,  $\text{CDCl}_3$ )  $\delta = -57.67$ ; HRMS (TOF ES<sup>+</sup>):  $m/z$  calcd for  $\text{C}_{32}\text{H}_{24}\text{F}_3\text{NNaO}_3$  [(M+Na)<sup>+</sup>], 550.1600, found, 550.1608.

**5-(2-(4-(Dimethylamino)phenyl)-2-oxoethyl)-3,4-diphenyl-1-(*p*-tolyl)-1,5-dihydro-2*H*-pyrrol-2-one (5p)**

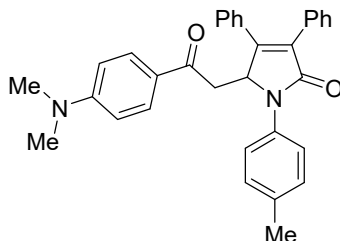

$V_{\text{Petroleum ether}}/V_{\text{Ethyl acetate}} = 4:1$ ,  $R_f = 0.2$ ; Yellow solid: 41 mg (42%); mp = 242–243 °C;  $^1\text{H NMR}$  (500 MHz,  $\text{CDCl}_3$ )  $\delta = 7.54$  (d,  $J = 8.1$  Hz, 2H), 7.50 (d,  $J = 9.1$  Hz, 2H), 7.48–7.44 (m, 2H), 7.33–7.28 (m, 5H), 7.21–7.20 (m, 3H), 7.13 (d,  $J = 8.1$  Hz, 2H), 6.46 (d,  $J = 9.1$  Hz, 2H), 6.14 (t,  $J = 4.9$  Hz, 1H), 3.08 (d,  $J = 4.9$  Hz, 2H), 2.98 (s, 6H), 2.27 (s, 3H);  $^{13}\text{C NMR}$  (125 MHz,  $\text{CDCl}_3$ )  $\delta = 194.2, 168.5, 153.5, 153.3, 134.6, 134.4, 132.1, 132.1, 131.5, 130.1, 130.1, 129.9, 129.9, 129.6, 129.6, 129.0, 129.0, 129.0, 128.6, 128.6, 128.2, 128.2, 128.0, 124.5, 122.8, 122.8, 110.3, 110.3, 58.4, 40.0, 40.0, 39.3, 20.9$ ; HRMS (TOF ES<sup>+</sup>):  $m/z$  calcd for  $\text{C}_{33}\text{H}_{30}\text{N}_2\text{NaO}_2$  [(M+Na)<sup>+</sup>], 509.2199, found, 509.2205.

**5-(2-(4-Bromophenyl)-2-oxoethyl)-3,4-diphenyl-1-(*p*-tolyl)-1,5-dihydro-2*H*-pyrrol-2-one (5q)**

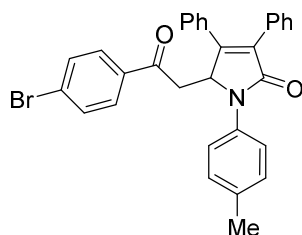

$V_{\text{Petroleum ether}}/V_{\text{Ethyl acetate}} = 4:1$ ,  $R_f = 0.3$ ; Yellow solid: 60 mg (58%); mp = 184–185 °C;  $^1\text{H NMR}$  (500 MHz,  $\text{CDCl}_3$ )  $\delta = 7.49\text{--}7.43$  (m, 4H), 7.41–7.35 (m, 4H), 7.33–7.29 (m, 3H), 7.26–7.21 (m, 5H), 7.13 (d,  $J = 8.1$  Hz, 2H), 6.01 (t,  $J = 5.1$  Hz, 1H), 3.10 (d,  $J = 4.3$  Hz, 2H), 2.28 (s, 3H);  $^{13}\text{C NMR}$  (125 MHz,  $\text{CDCl}_3$ )  $\delta = 196.2, 168.3, 152.5, 135.3, 135.2, 134.1, 132.6, 132.0, 131.6, 131.6, 131.6, 131.1, 129.8, 129.8, 129.7, 129.7, 129.3, 129.3, 128.9, 128.9, 128.8, 128.8, 128.4, 128.2, 128.2, 128.2, 123.1, 123.1, 59.0, 39.8, 20.9$ ; HRMS (TOF ES<sup>+</sup>):  $m/z$  calcd for  $\text{C}_{31}\text{H}_{24}\text{BrNNaO}_2$  [(M+Na)<sup>+</sup>], 544.0883, found, 544.0887.

**5-(2-Oxo-2-(4-(trifluoromethyl)phenyl)ethyl)-3,4-diphenyl-1-(*p*-tolyl)-1,5-dihydro-2*H*-pyrrol-2-one (5r)**

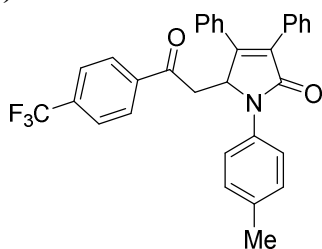

$V_{\text{Petroleum ether}}/V_{\text{Ethyl acetate}} = 4:1$ ,  $R_f = 0.2$ ; Yellow solid: 63 mg (62%); mp = 148–149 °C;  $^1\text{H NMR}$  (500 MHz,  $\text{CDCl}_3$ )  $\delta = 7.58$  (d,  $J = 8.3$  Hz, 2H), 7.52 (d,  $J = 8.2$  Hz, 2H), 7.45 (d,  $J = 8.2$  Hz, 4H), 7.33–7.26 (m, 5H), 7.25–7.21 (m, 3H), 7.12 (d,  $J = 8.0$  Hz, 2H), 6.01 (t,  $J = 5.1$  Hz, 1H), 3.15 (dd,  $J = 5.1, 1.7$  Hz, 2H), 2.27 (s, 3H);  $^{13}\text{C NMR}$  (125 MHz,  $\text{CDCl}_3$ )  $\delta = 196.6, 168.4, 152.4, 139.3, 135.4, 134.2, 132.8, 134.5$  (d,  $J = 31.3$  Hz), 132.1, 131.2, 129.9, 129.9, 129.9, 129.9, 129.4, 129.4, 129.0, 129.0, 129.0, 128.7 (d,  $J = 2.5$  Hz), 128.4, 128.4, 128.2, 128.2, 125.5 (q,  $J = 3.8$  Hz), 123.6 (d,  $J = 270.0$  Hz), 123.3, 123.3, 59.3, 40.2, 21.0;  $^{19}\text{F NMR}$  (470 MHz,  $\text{CDCl}_3$ )  $\delta = -63.23$ ; HRMS (TOF ES<sup>+</sup>):  $m/z$  calcd for  $\text{C}_{32}\text{H}_{24}\text{F}_3\text{NNaO}_2$  [(M+Na)<sup>+</sup>], 534.1651, found, 534.1653.

**5-(2-(4-Nitrophenyl)-2-oxoethyl)-3,4-diphenyl-1-(*p*-tolyl)-1,5-dihydro-2*H*-pyrrol-2-one (5s)**

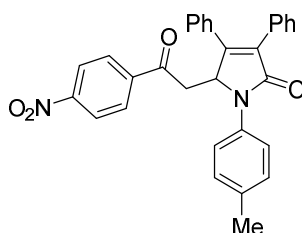

$V_{\text{Petroleum ether}}/V_{\text{Ethyl acetate}} = 4:1$ ,  $R_f = 0.2$ ; Yellow solid: 50 mg (51%); mp = 188–189 °C;  $^1\text{H NMR}$  (500 MHz,  $\text{CDCl}_3$ )  $\delta = 8.09$  (d,  $J = 8.9$  Hz, 2H), 7.60 (d,  $J = 8.9$  Hz, 2H),

7.46–7.44 (m, 4H), 7.31–7.30 (m, 3H), 7.26–7.23 (m, 5H), 7.13 (d,  $J = 8.1$  Hz, 2H), 5.98 (t,  $J = 5.1$  Hz, 1H), 3.17 (d,  $J = 5.1$  Hz, 2H), 2.28 (s, 3H);  $^{13}\text{C}$  NMR (125 MHz,  $\text{CDCl}_3$ )  $\delta = 196.1, 168.2, 152.0, 150.1, 140.9, 135.4, 134.0, 132.8, 131.9, 130.9, 129.8, 129.8, 129.8, 129.4, 128.9, 128.9, 128.9, 128.9, 128.7, 128.7, 128.3, 128.3, 128.3, 123.5, 123.5, 123.2, 123.2, 59.2, 40.2, 20.9$ ; HRMS (TOF ES<sup>+</sup>):  $m/z$  calcd for  $\text{C}_{31}\text{H}_{24}\text{N}_2\text{NaO}_4$  [(M+Na)<sup>+</sup>], 511.1628, found, 511.1635.

**5-(2-(3-Nitrophenyl)-2-oxoethyl)-3,4-diphenyl-1-(*p*-tolyl)-1,5-dihydro-2*H*-pyrrol-2-one (5t)**

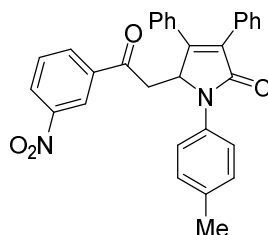

$V_{\text{Petroleum ether}}/V_{\text{Ethyl acetate}} = 4:1$ ,  $R_f = 0.1$ ; White solid: 73 mg (75%); mp = 190–191 °C;  $^1\text{H}$  NMR (500 MHz,  $\text{CDCl}_3$ )  $\delta = 8.27$  (d,  $J = 8.0$  Hz, 1H), 8.21 (s, 1H), 7.84 (d,  $J = 7.7$  Hz, 1H), 7.50–7.43 (m, 5H), 7.33–7.27 (m, 5H), 7.24–7.22 (m, 3H), 7.12 (d,  $J = 8.0$  Hz, 2H), 5.98 (t,  $J = 5.2$  Hz, 1H), 3.22–3.15 (m, 2H), 2.26 (s, 3H);  $^{13}\text{C}$  NMR (125 MHz,  $\text{CDCl}_3$ )  $\delta = 195.4, 168.2, 152.0, 148.0, 137.8, 135.4, 134.0, 133.1, 132.9, 131.9, 130.9, 129.8, 129.8, 129.8, 129.8, 129.5, 129.3, 128.9, 128.9, 128.9, 128.9, 128.3, 128.3, 128.3, 127.3, 123.3, 123.3, 122.7, 59.4, 39.9, 20.8$ ; HRMS (TOF ES<sup>+</sup>):  $m/z$  calcd for  $\text{C}_{31}\text{H}_{24}\text{N}_2\text{NaO}_4$  [(M+Na)<sup>+</sup>], 511.1628, found, 511.1630.

**5-(2-([1,1'-Biphenyl]-4-yl)-2-oxoethyl)-3,4-diphenyl-1-(*p*-tolyl)-1,5-dihydro-2*H*-pyrrol-2-one (5u)**

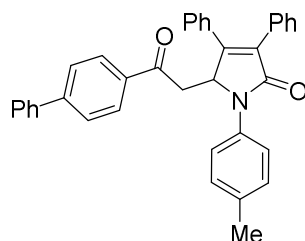

$V_{\text{Petroleum ether}}/V_{\text{Ethyl acetate}} = 4:1$ ,  $R_f = 0.3$ ; Yellow solid: 34 mg (33%); mp = 210–211 °C;  $^1\text{H}$  NMR (500 MHz,  $\text{CDCl}_3$ )  $\delta = 7.61$  (d,  $J = 8.1$  Hz, 2H), 7.56–7.52 (m, 3H), 7.50 (d,  $J = 4.6$  Hz, 2H), 7.49–7.47 (m, 2H), 7.47–7.42 (m, 3H), 7.39–7.38 (m, 1H), 7.32–7.29 (m, 5H), 7.24–7.23 (m, 3H), 7.14 (d,  $J = 8.1$  Hz, 2H), 6.09 (t,  $J = 4.9$  Hz, 1H), 3.19 (dd,  $J = 5.0, 2.0$  Hz, 2H), 2.28 (s, 3H);  $^{13}\text{C}$  NMR (125 MHz,  $\text{CDCl}_3$ )  $\delta = 196.7, 168.6, 153.0, 146.0, 139.8, 135.3, 135.2, 134.3, 132.6, 132.2, 131.4, 130.0, 130.0, 129.8, 129.8, 129.3, 129.1, 129.1, 129.1, 129.1, 128.9, 128.9, 128.5, 128.5, 128.4, 128.4, 128.4, 128.3, 127.3, 127.3, 127.0, 127.0, 123.2, 123.2, 58.9, 40.1, 21.1$ ; HRMS (TOF ES<sup>+</sup>):  $m/z$  calcd for  $\text{C}_{37}\text{H}_{29}\text{NNaO}_2$  [(M+Na)<sup>+</sup>], 542.2091, found, 542.2096.

**5-(2-Oxo-2-(thiophen-2-yl)ethyl)-3,4-diphenyl-1-(*p*-tolyl)-1,5-dihydro-2*H*-pyrrol-2-one (5v)**

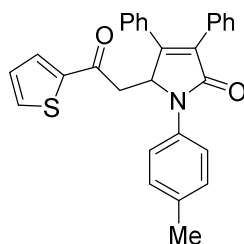

$V_{\text{Petroleum ether}}/V_{\text{Ethyl acetate}} = 4:1$ ,  $R_f = 0.3$ ; Yellow solid: 42 mg (47%); mp = 148–149 °C;  $^1\text{H NMR}$  (500 MHz,  $\text{CDCl}_3$ )  $\delta = 7.52\text{--}7.43$  (m, 5H), 7.33–7.26 (m, 5H), 7.24–7.18 (m, 4H), 7.14 (d,  $J = 8.0$  Hz, 2H), 6.90–6.88 (m, 1H), 5.98 (t,  $J = 5.1$  Hz, 1H), 3.08 (d,  $J = 5.1$  Hz, 2H), 2.28 (s, 3H);  $^{13}\text{C NMR}$  (125 MHz,  $\text{CDCl}_3$ )  $\delta = 189.6, 168.5, 152.7, 143.8, 135.2, 134.3, 134.2, 132.6, 132.2, 132.1, 131.3, 130.0, 130.0, 129.8, 129.8, 129.3, 129.1, 129.1, 128.9, 128.9, 128.4, 128.4, 128.3, 127.9, 123.2, 123.2, 59.1, 40.8, 21.0$ ; HRMS (TOF ES<sup>+</sup>): m/z calcd for  $\text{C}_{29}\text{H}_{23}\text{NNaO}_2\text{S}$  [(M+Na)<sup>+</sup>], 472.1342, found, 472.1346.

**5-(2-(Benzo[d][1,3]dioxol-5-yl)-2-oxoethyl)-3,4-diphenyl-1-(p-tolyl)-1,5-dihydro-2H-pyrrol-2-one (5w)**

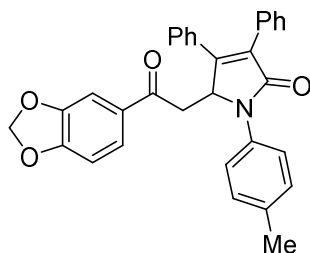

$V_{\text{Petroleum ether}}/V_{\text{Ethyl acetate}} = 4:1$ ,  $R_f = 0.1$  White solid: 40 mg (41%); mp = 195–196 °C;  $^1\text{H NMR}$  (500 MHz,  $\text{CDCl}_3$ )  $\delta = 7.49$  (d,  $J = 8.2$  Hz, 2H), 7.47–7.43 (m, 2H), 7.32–7.30 (m, 3H), 7.29–7.27 (m, 2H), 7.25–7.21 (m, 3H), 7.14 (d,  $J = 8.0$  Hz, 2H), 7.10 (dd,  $J = 8.2, 1.8$  Hz, 1H), 7.05 (d,  $J = 1.7$  Hz, 1H), 6.63 (d,  $J = 8.2$  Hz, 1H), 6.04 (t,  $J = 5.0$  Hz, 1H), 5.97 (s, 2H), 3.07 (d,  $J = 5.0$  Hz, 2H), 2.29 (s, 3H);  $^{13}\text{C NMR}$  (125 MHz,  $\text{CDCl}_3$ )  $\delta = 194.9, 168.4, 152.9, 151.8, 147.9, 135.0, 134.2, 132.4, 132.0, 131.4, 131.2, 129.8, 129.8, 129.6, 129.6, 129.1, 128.9, 128.9, 128.7, 128.7, 128.2, 128.2, 128.1, 124.2, 123.0, 123.0, 107.6, 107.5, 101.8, 58.8, 39.8, 20.9$ ; HRMS (TOF ES<sup>+</sup>): m/z calcd for  $\text{C}_{32}\text{H}_{25}\text{NNaO}_4$  [(M+Na)<sup>+</sup>], 510.1676, found, 510.1680.

**5-(2-((3r,5r,7r)-Adamantan-1-yl)-2-oxoethyl)-3,4-diphenyl-1-(p-tolyl)-1,5-dihydro-2H-pyrrol-2-one (5x)**

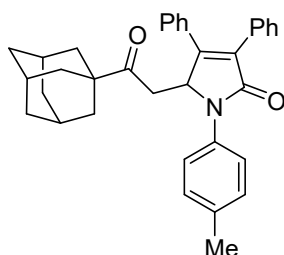

$V_{\text{Petroleum ether}}/V_{\text{Ethyl acetate}} = 4:1$ ,  $R_f = 0.4$ ; White solid: 49 mg (49%); mp = 222–223 °C;  $^1\text{H NMR}$  (500 MHz,  $\text{CDCl}_3$ )  $\delta = 7.51$  (d,  $J = 8.5$  Hz, 2H), 7.45–7.40 (m, 2H), 7.34–

7.27 (m, 6H), 7.25–7.17 (m, 4H), 6.01 (t,  $J = 4.8$  Hz, 1H), 2.69–2.61 (m, 2H), 2.34 (s, 3H), 1.87–1.80 (m, 3H), 1.61–1.56 (m, 3H), 1.47–1.45 (m, 3H), 1.29 (s, 6H);  $^{13}\text{C}$  NMR (125 MHz,  $\text{CDCl}_3$ )  $\delta = 212.1, 168.5, 153.4, 134.8, 134.4, 132.3, 132.1, 131.4, 130.0, 130.0, 129.8, 129.8, 129.3, 129.3, 129.3, 128.8, 128.8, 128.3, 128.3, 128.2, 122.7, 122.7, 57.4, 46.5, 38.3, 37.6, 37.6, 37.6, 36.4, 36.4, 36.4, 27.8, 27.8, 27.8, 21.1$ ; HRMS (TOF ES<sup>+</sup>):  $m/z$  calcd for  $\text{C}_{35}\text{H}_{35}\text{NNaO}_2$  [(M+Na)<sup>+</sup>], 524.2560, found, 524.2566.

### 5-(2-Oxo-2-phenylethyl)-1,3,4-tri-*p*-tolyl-1,5-dihydro-2*H*-pyrrol-2-one (5y)

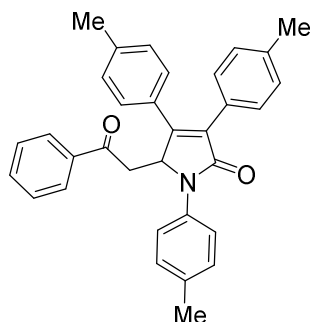

$V_{\text{Petroleum ether}}/V_{\text{Ethyl acetate}} = 4:1$ ,  $R_f = 0.3$ ; Yellow solid: 64 mg (68%); mp = 116–117 °C;  $^1\text{H}$  NMR (600 MHz,  $\text{CDCl}_3$ )  $\delta = 7.53$  (d,  $J = 7.9$  Hz, 2H), 7.49 (d,  $J = 8.1$  Hz, 2H), 7.44 (t,  $J = 7.4$  Hz, 1H), 7.36 (d,  $J = 7.7$  Hz, 2H), 7.29–7.26 (m, 3H), 7.17 (d,  $J = 7.8$  Hz, 2H), 7.14–7.10 (m, 4H), 7.02 (d,  $J = 7.8$  Hz, 2H), 6.04 (t,  $J = 5.0$  Hz, 1H), 3.17–3.10 (m, 2H), 2.34 (s, 3H), 2.26 (s, 3H), 2.25 (s, 3H);  $^{13}\text{C}$  NMR (150 MHz,  $\text{CDCl}_3$ )  $\delta = 197.3, 168.7, 152.3, 139.2, 137.8, 136.5, 134.8, 134.2, 133.1, 131.6, 129.6, 129.6, 129.6, 129.6, 129.4, 129.4, 129.1, 128.9, 128.9, 128.8, 128.8, 128.4, 128.2, 128.2, 127.8, 127.8, 123.0, 123.0, 58.5, 40.3, 21.4, 21.3, 20.9$ ; HRMS (TOF ES<sup>+</sup>):  $m/z$  calcd for  $\text{C}_{33}\text{H}_{29}\text{NNaO}_2$  [(M+Na)<sup>+</sup>], 494.2091, found, 494.2100.

### 3,4-Bis(4-fluorophenyl)-5-(2-oxo-2-phenylethyl)-1-(*p*-tolyl)-1,5-dihydro-2*H*-pyrrol-2-one (5z)

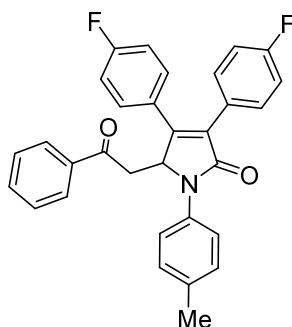

$V_{\text{Petroleum ether}}/V_{\text{Ethyl acetate}} = 4:1$ ,  $R_f = 0.3$ ; Yellow solid: 70 mg (73%); mp = 159–160 °C;  $^1\text{H}$  NMR (600 MHz,  $\text{CDCl}_3$ )  $\delta = 7.54$  (d,  $J = 7.5$  Hz, 2H), 7.49–7.41 (m, 5H), 7.29 (t,  $J = 7.9$  Hz, 2H), 7.25–7.24 (m, 2H), 7.14 (d,  $J = 8.1$  Hz, 2H), 7.02 (t,  $J = 8.7$  Hz, 2H), 6.93 (t,  $J = 8.6$  Hz, 2H), 6.03 (t,  $J = 5.0$  Hz, 1H), 3.15 (d,  $J = 6.2$  Hz, 2H), 2.28 (s, 3H);  $^{13}\text{C}$  NMR (150 MHz,  $\text{CDCl}_3$ )  $\delta = 195.1, 166.3, 161.2$  (d,  $J = 250.5$  Hz), 160.8 (d,  $J = 246.0$  Hz), 149.9, 134.5, 133.4, 132.1, 131.6, 129.8 (d,  $J = 9.0$  Hz), 129.8 (d,  $J = 9.0$  Hz), 129.7, 129.0 (d,  $J = 9.0$  Hz), 129.0 (d,  $J = 9.0$  Hz), 127.9, 127.9, 126.6, 126.6, 126.0, 126.0, 126.0, 125.1 (d,  $J = 3.0$  Hz), 121.0, 121.0, 114.2 (d,  $J = 21.0$  Hz), 114.2

(d,  $J = 21.0$  Hz), 113.6 (d,  $J = 21.0$  Hz), 113.6 (d,  $J = 21.0$  Hz), 56.8, 37.9, 19.1;  $^{19}\text{F}$  NMR (470 MHz,  $\text{CDCl}_3$ )  $\delta = -110.71, -112.80$ ; HRMS (TOF ES $^+$ ):  $m/z$  calcd for  $\text{C}_{31}\text{H}_{23}\text{F}_2\text{NNaO}_2$  [(M+Na) $^+$ ], 502.1589, found, 502.1599.

**3,4-Bis(4-chlorophenyl)-5-(2-oxo-2-phenylethyl)-1-(*p*-tolyl)-1,5-dihydro-2*H*-pyrrol-2-one (5a')**

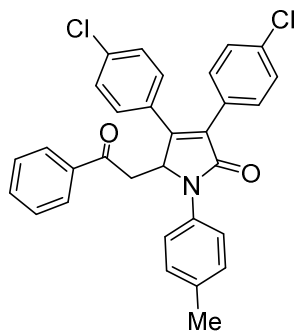

$V_{\text{Petroleum ether}}/V_{\text{Ethyl acetate}} = 4:1$ ,  $R_f = 0.3$ ; Yellow solid: 55 mg (54%); mp = 159–160 °C;  $^1\text{H}$  NMR (500 MHz,  $\text{CDCl}_3$ )  $\delta = 7.54$  (d,  $J = 7.2$  Hz, 2H), 7.48–7.45 (m, 3H), 7.39 (d,  $J = 8.5$  Hz, 2H), 7.31–7.28 (m, 4H), 7.23–7.18 (m, 4H), 7.14 (d,  $J = 8.1$  Hz, 2H), 6.01 (t,  $J = 5.0$  Hz, 1H), 3.14 (dd,  $J = 4.9, 1.9$  Hz, 2H), 2.28 (s, 3H);  $^{13}\text{C}$  NMR (125 MHz,  $\text{CDCl}_3$ )  $\delta = 196.8, 167.8, 151.9, 136.3, 135.5, 135.3, 134.4, 133.9, 133.4, 131.8, 131.1, 131.1, 130.2, 130.2, 130.2, 129.8, 129.8, 129.3, 129.2, 129.2, 128.7, 128.7, 128.4, 128.4, 127.8, 127.8, 123.0, 123.0, 58.7, 39.6, 20.9$ ; HRMS (TOF ES $^+$ ):  $m/z$  calcd for  $\text{C}_{31}\text{H}_{23}\text{Cl}_2\text{NNaO}_2$  [(M+Na) $^+$ ], 534.0998, found, 534.1006.

**3,4-Bis(3-chlorophenyl)-5-(2-oxo-2-phenylethyl)-1-(*p*-tolyl)-1,5-dihydro-2*H*-pyrrol-2-one (5b')**

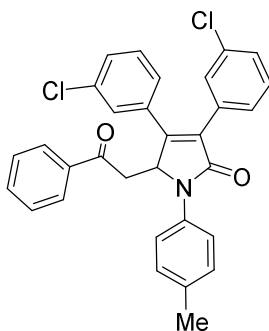

$V_{\text{Petroleum ether}}/V_{\text{Ethyl acetate}} = 4:1$ ,  $R_f = 0.3$ ; Yellow solid: 57 mg (56%); mp = 152–153 °C;  $^1\text{H}$  NMR (600 MHz,  $\text{CDCl}_3$ )  $\delta = 7.53$ –7.51 (m, 3H), 7.47–7.45 (m, 3H), 7.31–7.28 (m, 3H), 7.24–7.20 (m, 4H), 7.18–7.12 (m, 4H), 5.99 (t,  $J = 5.1$  Hz, 1H), 3.19–3.12 (m, 2H), 2.29 (s, 3H);  $^{13}\text{C}$  NMR (150 MHz,  $\text{CDCl}_3$ )  $\delta = 196.6, 167.5, 152.1, 136.3, 135.4, 134.8, 134.3, 133.7, 133.4, 133.4, 132.4, 132.2, 130.2, 129.8, 129.8, 129.7, 129.6, 129.5, 128.7, 128.6, 128.4, 128.4, 127.9, 127.8, 127.8, 127.1, 123.0, 123.0, 58.9, 39.3, 20.9$ ; HRMS (TOF ES $^+$ ):  $m/z$  calcd for  $\text{C}_{31}\text{H}_{23}\text{Cl}_2\text{NNaO}_2$  [(M+Na) $^+$ ], 534.0998, found, 534.1008.

**3,4-Bis(4-bromophenyl)-5-(2-oxo-2-phenylethyl)-1-(*p*-tolyl)-1,5-dihydro-2*H*-pyrrol-2-one (5c')**

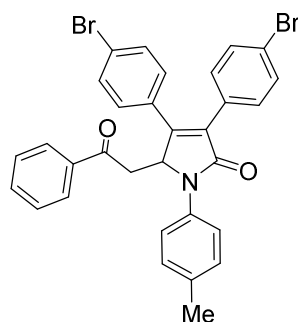

$V_{\text{Petroleum ether}}/V_{\text{Ethyl acetate}} = 4:1$ ,  $R_f = 0.3$ ; Yellow solid: 46 mg (38%); mp = 161–162 °C;  $^1\text{H NMR}$  (600 MHz,  $\text{CDCl}_3$ )  $\delta = 7.54$  (d,  $J = 7.8$  Hz, 2H), 7.46–7.44 (m, 4H), 7.37 (d,  $J = 8.2$  Hz, 2H), 7.34–7.26 (m, 5H), 7.16–7.12 (m, 4H), 6.01 (t,  $J = 5.0$  Hz, 1H), 3.14 (t,  $J = 4.6$  Hz, 2H), 2.28 (s, 3H);  $^{13}\text{C NMR}$  (150 MHz,  $\text{CDCl}_3$ )  $\delta = 196.8$ , 167.7, 151.9, 136.2, 135.4, 133.7, 133.4, 132.2, 132.2, 131.8, 131.6, 131.6, 131.4, 131.4, 130.5, 130.4, 130.4, 129.8, 129.8, 129.7, 128.4, 128.4, 127.8, 127.8, 123.9, 122.9, 122.7, 122.7, 58.6, 39.6, 20.9; HRMS (TOF ES<sup>+</sup>): m/z calcd for  $\text{C}_{31}\text{H}_{23}\text{Br}_2\text{NNaO}_2$  [(M+Na)<sup>+</sup>], 621.9988, found, 621.9985.

**(Z)-5-(2-Oxo-2-phenylethylidene)-3,4-diphenyl-1-(p-tolyl)-1,5-dihydro-2H-pyrrol-2-one (7a)**

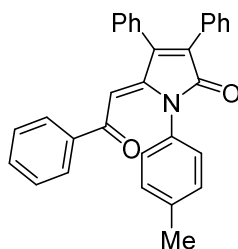

$V_{\text{Petroleum ether}}/V_{\text{Ethyl acetate}} = 4:1$ ,  $R_f = 0.3$ ;  $Z/E > 20/1$ , Yellow solid: 39 mg (44%); mp = 212–213 °C;  $^1\text{H NMR}$  (600 MHz,  $\text{CDCl}_3$ )  $\delta = 7.53$  (d,  $J = 7.8$  Hz, 2H), 7.48–7.44 (m, 6H), 7.43–7.40 (m, 2H), 7.33–7.30 (m, 2H), 7.27–7.26 (m, 3H), 6.94 (s, 4H), 6.00 (s, 1H), 2.26 (s, 3H);  $^{13}\text{C NMR}$  (150 MHz,  $\text{CDCl}_3$ )  $\delta = 192.2$ , 169.4, 146.6, 145.2, 137.8, 137.5, 133.2, 133.1, 131.4, 130.8, 130.1, 130.0, 130.0, 129.9, 129.9, 129.6, 129.6, 129.3, 129.1, 129.1, 128.8, 128.6, 128.6, 128.3, 128.3, 128.3, 128.3, 127.3, 127.3, 109.1, 21.3; HRMS (TOF ES<sup>+</sup>): m/z calcd for  $\text{C}_{31}\text{H}_{23}\text{NNaO}_2$  [(M+Na)<sup>+</sup>], 464.1621, found, 464.1623.

**(Z)-5-(2-(4-Ethylphenyl)-2-oxoethylidene)-3,4-diphenyl-1-(p-tolyl)-1,5-dihydro-2H-pyrrol-2-one (7b)**

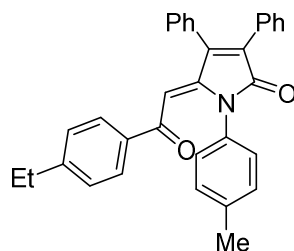

$V_{\text{Petroleum ether}}/V_{\text{Ethyl acetate}} = 4:1$ ,  $R_f = 0.3$ ;  $Z/E = 5/1$ , Yellow solid: 40 mg (43%); mp = 210–211 °C;  $^1\text{H NMR}$  (600 MHz,  $\text{CDCl}_3$ )  $\delta = 7.46$ –7.44 (m, 6H), 7.41–7.40 (m, 2H), 7.37 (s, 1H), 7.27–7.26 (m, 3H), 7.13 (d,  $J = 7.8$  Hz, 2H), 6.95 (s, 4H), 6.00 (s, 1H),

2.66 (q,  $J = 7.8$  Hz, 2H), 2.26 (s, 3H), 1.24 (t,  $J = 7.7$  Hz, 3H);  $^{13}\text{C}$  NMR (150 MHz,  $\text{CDCl}_3$ )  $\delta = 191.6, 169.3, 150.1, 146.2, 145.1, 137.2, 135.5, 133.1, 131.3, 130.5, 130.4, 129.8, 129.8, 129.8, 129.8, 129.4, 129.4, 129.1, 128.9, 128.9, 128.7, 128.7, 128.6, 128.1, 128.1, 127.7, 127.7, 127.2, 127.2, 109.3, 29.0, 21.1, 15.4$ ; HRMS (TOF ES $^+$ ):  $m/z$  calcd for  $\text{C}_{33}\text{H}_{27}\text{NNaO}_2$  [(M $^+$  Na) $^+$ ], 492.1934, found, 492.1942.

**(Z)-5-(2-Oxo-2-(4-(trifluoromethoxy)phenyl)ethylidene)-3,4-diphenyl-1-(p-tolyl)-1,5-dihydro-2H-pyrrol-2-one (7c)**

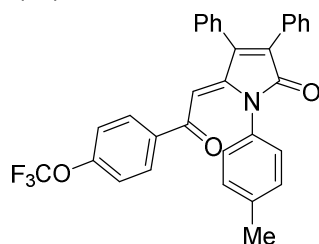

$V_{\text{Petroleum ether}}/V_{\text{Ethyl acetate}} = 4:1$ ,  $R_f = 0.2$ ;  $Z/E = 4/1$ , Yellow solid: 39 mg (37%); mp = 207–208 °C;  $^1\text{H}$  NMR (600 MHz,  $\text{CDCl}_3$ )  $\delta = 7.53$  (d,  $J = 8.2$  Hz, 2H), 7.48–7.47 (m, 2H), 7.45–7.43 (m, 2H), 7.41–7.40 (m, 2H), 7.37 (s, 1H), 7.29–7.27 (s, 3H), 7.12 (d,  $J = 8.3$  Hz, 2H), 6.95 (d,  $J = 7.8$  Hz, 2H), 6.89 (d,  $J = 8.0$  Hz, 2H), 5.92 (s, 1H), 2.27 (s, 3H);  $^{13}\text{C}$  NMR (150 MHz,  $\text{CDCl}_3$ )  $\delta = 190.9, 169.1, 152.3, 146.8, 145.0, 137.6, 136.0, 133.0, 131.1, 130.8, 130.5, 130.4, 130.4, 129.8, 129.8, 129.8, 129.8, 129.5, 129.5, 129.3, 129.0, 129.0, 128.8, 128.4, 128.4, 128.2, 128.2, 127.2, 127.2, 120.1, 108.1, 21.1$ ;  $^{19}\text{F}$  NMR (470 MHz,  $\text{CDCl}_3$ )  $\delta = -57.63$ ; HRMS (TOF ES $^+$ ):  $m/z$  calcd for  $\text{C}_{32}\text{H}_{22}\text{F}_3\text{NNaO}_3$  [(M $^+$  Na) $^+$ ], 548.1444, found, 548.1453.

**(Z)-5-(2-Oxo-2-(3-(trifluoromethyl)phenyl)ethylidene)-3,4-diphenyl-1-(p-tolyl)-1,5-dihydro-2H-pyrrol-2-one (7d)**

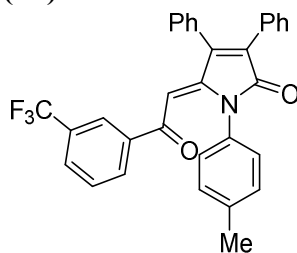

$V_{\text{Petroleum ether}}/V_{\text{Ethyl acetate}} = 4:1$ ,  $R_f = 0.2$ ;  $Z/E = 4/1$ , Yellow solid: 23 mg (23%); mp = 241–242 °C;  $^1\text{H}$  NMR (600 MHz,  $\text{CDCl}_3$ )  $\delta = 7.73$ –7.69 (m, 2H), 7.60 (s, 1H), 7.49–7.47 (m, 3H), 7.46–7.44 (m, 2H), 7.43–7.41 (m, 2H), 7.38 (s, 1H), 7.28–7.26 (m, 3H), 6.92 (d,  $J = 7.7$  Hz, 2H), 6.85 (d,  $J = 7.9$  Hz, 2H), 5.91 (s, 1H), 2.25 (s, 3H);  $^{13}\text{C}$  NMR (150 MHz,  $\text{CDCl}_3$ )  $\delta = 191.5, 169.1, 147.1, 144.9, 138.3, 137.7, 132.9, 131.8, 131.0, 130.8, 130.8$  (d,  $J = 33.0$  Hz), 130.5, 129.9, 129.9, 129.8, 129.8, 129.5, 129.5, 129.3, 129.1, 129.1, 128.9, 128.7, 128.4 (d,  $J = 3.0$  Hz), 128.2, 128.2, 127.2, 127.2, 124.6 (q,  $J = 3.0$  Hz), 123.6 (d,  $J = 271.5$  Hz), 107.7, 20.9;  $^{19}\text{F}$  NMR (470 MHz,  $\text{CDCl}_3$ )  $\delta = -62.84$ ; HRMS (TOF ES $^+$ ):  $m/z$  calcd for  $\text{C}_{32}\text{H}_{22}\text{F}_3\text{NNaO}_2$  [(M $^+$  Na) $^+$ ], 532.1495, found, 532.1501.



**(Z)-5-(2-(3-Nitrophenyl)-2-oxoethylidene)-3,4-diphenyl-1-(p-tolyl)-1,5-dihydro-2H-pyrrol-2-one (7e)**

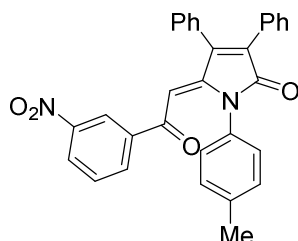

$V_{\text{Petroleum ether}}/V_{\text{Ethyl acetate}} = 4:1$ ,  $R_f = 0.2$ ;  $Z/E = 2/1$ , Yellow solid: 41 mg (42%); mp = 203–204 °C;  $^1\text{H NMR}$  (600 MHz,  $\text{CDCl}_3$ )  $\delta = 8.31\text{--}8.26$  (m, 1H), 8.19 (s, 1H), 7.83–7.80 (m, 1H), 7.50–7.48 (m, 3H), 7.46–7.43 (m, 3H), 7.39 (s, 1H), 7.28–7.26 (m, 3H), 7.02 (t,  $J = 7.5$  Hz, 1H), 6.93 (d,  $J = 8.6$  Hz, 2H), 6.87 (d,  $J = 7.9$  Hz, 2H), 5.93 (s, 1H), 2.25 (s, 3H);  $^{13}\text{C NMR}$  (150 MHz,  $\text{CDCl}_3$ )  $\delta = 190.4$ , 169.1, 148.0, 147.8, 145.0, 139.3, 138.0, 133.8, 133.0, 131.0, 130.5, 129.9, 129.9, 129.7, 129.7, 129.6, 129.6, 129.4, 129.2, 129.1, 129.1, 128.4, 128.2, 128.2, 128.1, 127.2, 127.2, 126.8, 122.8, 106.9, 21.0; HRMS (TOF ES<sup>+</sup>):  $m/z$  calcd for  $\text{C}_{31}\text{H}_{22}\text{N}_2\text{NaO}_4$  [(M+ Na)<sup>+</sup>], 509.1472, found, 509.1475.

**(Z)-5-(2-([1,1'-Biphenyl]-4-yl)-2-oxoethylidene)-3,4-diphenyl-1-(p-tolyl)-1,5-dihydro-2H-pyrrol-2-one (7f)**

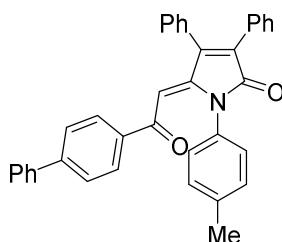

$V_{\text{Petroleum ether}}/V_{\text{Ethyl acetate}} = 4:1$ ,  $R_f = 0.3$ ;  $Z/E = 7/1$ , Yellow solid: 37 mg (36%); mp = 245–246 °C;  $^1\text{H NMR}$  (600 MHz,  $\text{CDCl}_3$ )  $\delta = 7.60\text{--}7.58$  (m, 4H), 7.53 (d,  $J = 8.0$  Hz, 2H), 7.49–7.46 (m, 6H), 7.44–7.39 (m, 4H), 7.27–7.26 (m, 3H), 6.96 (s, 4H), 6.04 (s, 1H), 2.27 (s, 3H);  $^{13}\text{C NMR}$  (150 MHz,  $\text{CDCl}_3$ )  $\delta = 191.6$ , 169.3, 146.5, 145.7, 145.1, 139.9, 137.4, 136.4, 133.1, 131.3, 130.6, 130.4, 129.9, 129.9, 129.8, 129.8, 129.4, 129.4, 129.2, 129.1, 129.0, 129.0, 129.0, 129.0, 129.0, 129.0, 128.7, 128.3, 128.2, 128.2, 127.2, 127.2, 126.8, 126.8, 109.0, 21.2; HRMS (TOF ES<sup>+</sup>):  $m/z$  calcd for  $\text{C}_{37}\text{H}_{27}\text{NNaO}_2$  [(M+ Na)<sup>+</sup>], 540.1934, found, 540.1942.

**(Z)-5-(2-(Naphthalen-2-yl)-2-oxoethylidene)-3,4-diphenyl-1-(p-tolyl)-1,5-dihydro-2H-pyrrol-2-one (7g)**

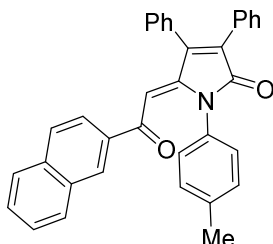

$V_{\text{Petroleum ether}}/V_{\text{Ethyl acetate}} = 4:1$ ,  $R_f = 0.3$ ;  $Z/E = 6/1$  Yellow solid: 32 mg (33%); mp = 240–241 °C;  $^1\text{H NMR}$  (600 MHz,  $\text{CDCl}_3$ )  $\delta = 8.05$  (s, 1H), 7.88 (d,  $J = 8.2$  Hz, 1H),

7.83 (d,  $J = 8.2$  Hz, 1H), 7.73 (d,  $J = 8.6$  Hz, 1H), 7.60–7.53 (m, 3H), 7.49–7.44 (m, 6H), 7.28–7.26 (m, 4H), 6.91 (d,  $J = 6.5$  Hz, 2H), 6.82 (d,  $J = 7.8$  Hz, 2H), 6.12 (s, 1H), 2.18 (s, 3H);  $^{13}\text{C}$  NMR (150 MHz,  $\text{CDCl}_3$ )  $\delta = 192.3, 169.4, 146.6, 145.2, 137.6, 135.6, 135.2, 133.2, 132.4, 131.4, 130.8, 130.5, 130.0, 130.0, 130.0, 130.0, 129.6, 129.5, 129.3, 129.1, 129.1, 128.8, 128.7, 128.3, 128.3, 128.1, 127.9, 127.3, 127.3, 126.8, 124.1, 109.3, 21.2$ ; HRMS (TOF ES<sup>+</sup>):  $m/z$  calcd for  $\text{C}_{35}\text{H}_{25}\text{NNaO}_2$  [(M+Na)<sup>+</sup>], 514.1778, found, 514.1787.

**(Z)-5-(2-Oxo-2-(thiophen-2-yl)ethylidene)-3,4-diphenyl-1-(p-tolyl)-1,5-dihydro-2H-pyrrol-2-one (7h)**

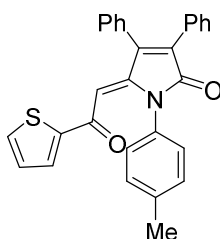

$V_{\text{Petroleum ether}}/V_{\text{Ethyl acetate}} = 4:1$ ,  $R_f = 0.3$ ;  $Z/E = 9/1$ , Yellow solid: 41 mg (46%); mp = 233–234 °C;  $^1\text{H}$  NMR (600 MHz,  $\text{CDCl}_3$ )  $\delta = 7.56$  (d,  $J = 4.9$  Hz, 1H), 7.47–7.46 (m, 3H), 7.45–7.42 (m, 3H), 7.40–7.38 (m, 2H), 7.27–7.26 (s, 3H), 7.07–7.02 (m, 5H), 6.02 (s, 1H), 2.31 (s, 3H);  $^{13}\text{C}$  NMR (150 MHz,  $\text{CDCl}_3$ )  $\delta = 183.2, 169.3, 146.6, 145.2, 145.1, 137.4, 134.2, 133.1, 132.7, 131.1, 130.7, 130.3, 129.8, 129.8, 129.7, 129.7, 129.4, 129.4, 129.2, 128.9, 128.9, 128.7, 128.1, 128.1, 127.7, 127.0, 127.0, 108.0, 21.2$ ; HRMS (TOF ES<sup>+</sup>):  $m/z$  calcd for  $\text{C}_{29}\text{H}_{21}\text{NNaO}_2\text{S}$  [(M+Na)<sup>+</sup>], 470.1185, found, 470.1193.

**(Z)-5-(2-Oxo-2-phenylethylidene)-1,3,4-triphenyl-1,5-dihydro-2H-pyrrol-2-one (7i)**

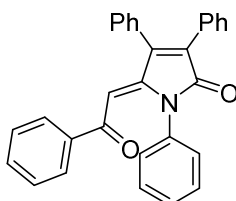

$V_{\text{Petroleum ether}}/V_{\text{Ethyl acetate}} = 4:1$ ,  $R_f = 0.3$ ;  $Z/E > 20/1$ , Yellow solid: 32 mg (38%); mp = 221–222 °C;  $^1\text{H}$  NMR (600 MHz,  $\text{CDCl}_3$ )  $\delta = 7.53$  (d,  $J = 7.7$  Hz, 2H), 7.49–7.44 (m, 6H), 7.43–7.41 (m, 2H), 7.31 (t,  $J = 7.7$  Hz, 2H), 7.28–7.26 (s, 3H), 7.18–7.17 (d,  $J = 5.4$  Hz, 3H), 7.10–7.06 (m, 2H), 6.04 (s, 1H);  $^{13}\text{C}$  NMR (150 MHz,  $\text{CDCl}_3$ )  $\delta = 191.8, 169.1, 146.4, 145.2, 137.5, 135.8, 133.0, 131.1, 130.6, 129.8, 129.8, 129.8, 129.7, 129.7, 129.2, 128.9, 128.9, 128.7, 128.7, 128.7, 128.4, 128.4, 128.3, 128.3, 128.1, 128.1, 127.4, 127.3, 127.3, 108.9$ ; HRMS (TOF ES<sup>+</sup>):  $m/z$  calcd for  $\text{C}_{30}\text{H}_{21}\text{NNaO}_2$  [(M+Na)<sup>+</sup>], 450.1465, found, 450.1474.

**(Z)-1-(4-Isopropylphenyl)-5-(2-oxo-2-phenylethylidene)-3,4-diphenyl-1,5-dihydro-2H-pyrrol-2-one (7j)**

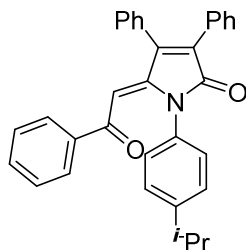

$V_{\text{Petroleum ether}}/V_{\text{Ethyl acetate}} = 4:1$ ,  $R_f = 0.3$ ;  $Z/E = 10/1$ , Yellow solid: 38 mg (41%); mp = 219–220 °C;  $^1\text{H NMR}$  (600 MHz,  $\text{CDCl}_3$ )  $\delta = 7.47\text{--}7.44$  (m, 7H), 7.44–7.39 (m, 3H), 7.29–7.27 (m, 5H), 6.95 (d,  $J = 8.0$  Hz, 2H), 6.90 (d,  $J = 8.0$  Hz, 2H), 5.94 (s, 1H), 2.82–2.78 (m, 1H), 1.18 (d,  $J = 6.9$  Hz, 6H);  $^{13}\text{C NMR}$  (150 MHz,  $\text{CDCl}_3$ )  $\delta = 192.8$ , 169.1, 148.1, 146.0, 144.9, 137.6, 133.1, 132.9, 131.3, 130.5, 130.0, 129.8, 129.8, 129.8, 129.8, 129.2, 129.0, 129.0, 128.7, 128.4, 128.4, 128.2, 128.2, 128.1, 128.1, 127.5, 127.5, 126.8, 126.8, 109.3, 33.7, 23.9, 23.9; HRMS (TOF ES<sup>+</sup>):  $m/z$  calcd for  $\text{C}_{33}\text{H}_{27}\text{NNaO}_2$  [(M+ Na)<sup>+</sup>], 492.1934, found, 492.1942.

**(Z)-1-(4-Bromophenyl)-5-(2-oxo-2-phenylethylidene)-3,4-diphenyl-1,5-dihydro-2H-pyrrol-2-one (7k)**

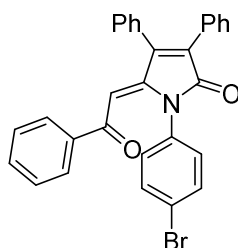

$V_{\text{Petroleum ether}}/V_{\text{Ethyl acetate}} = 4:1$ ,  $R_f = 0.3$ ;  $Z/E = 5/1$ , Yellow solid: 40 mg (40%); mp > 250 °C;  $^1\text{H NMR}$  (500 MHz,  $\text{CDCl}_3$ )  $\delta = 7.54$  (dd,  $J = 8.2$ , 1.4 Hz, 2H), 7.49–7.47 (m, 3H), 7.44–7.43 (m, 2H), 7.41–7.39 (m, 2H), 7.37–7.33 (m, 2H), 7.29–7.27 (m, 6H), 6.95 (d,  $J = 8.6$  Hz, 2H), 6.06 (s, 1H);  $^{13}\text{C NMR}$  (125 MHz,  $\text{CDCl}_3$ )  $\delta = 191.7$ , 169.0, 146.2, 145.5, 137.6, 134.9, 133.3, 133.0, 131.9, 131.9, 131.1, 130.7, 129.8, 129.8, 129.7, 129.7, 129.4, 129.1, 129.1, 128.9, 128.9, 128.9, 128.4, 128.4, 128.4, 128.4, 128.2, 128.2, 121.4, 109.0; HRMS (TOF ES<sup>+</sup>):  $m/z$  calcd for  $\text{C}_{30}\text{H}_{20}\text{BrNNaO}_2$  [(M+ Na)<sup>+</sup>], 528.0570, found, 528.0579.

**5-(2-Hydroxyethyl)-3,4,5-triphenylfuran-2(5H)-one (8)**

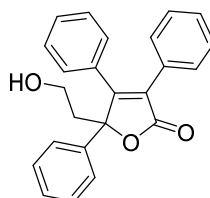

$V_{\text{Petroleum ether}}/V_{\text{Ethyl acetate}} = 4:1$ ,  $R_f = 0.1$ ; Yellow oil: 53 mg (75%);  $^1\text{H NMR}$  (600 MHz,  $\text{DMSO-}d_6$ )  $\delta = 7.43\text{--}7.39$  (m, 3H), 7.36–7.30 (m, 8H), 7.29–7.25 (m, 2H), 6.84 (d,  $J = 7.7$  Hz, 2H), 4.79–4.76 (m, 1H), 3.61–3.52 (m, 2H), 2.60–2.52 (m, 2H);  $^{13}\text{C NMR}$  (150 MHz,  $\text{DMSO-}d_6$ )  $\delta = 171.7$ , 164.8, 137.7, 131.7, 130.1, 129.9, 129.6, 129.6, 129.3, 129.3, 129.2, 129.1, 129.0, 129.0, 128.7, 128.7, 128.7, 128.7, 126.3, 126.2, 126.2, 88.9,

56.6, 37.5; HRMS (TOF ES<sup>+</sup>): m/z calcd for C<sub>24</sub>H<sub>20</sub>NaO<sub>3</sub> [(M+Na)<sup>+</sup>], 379.1305, found, 379.1306.

**2-Bromo-2-(5-oxo-2,3,4-triphenyl-2,5-dihydrofuran-2-yl)acetaldehyde (9)**

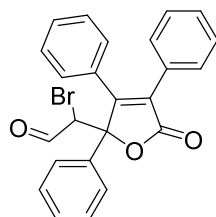

V<sub>Petroleum ether</sub>/V<sub>Ethyl acetate</sub> = 5:1, R<sub>f</sub> = 0.3; White solid: 46 mg (53%); mp = 137–138 °C; d/r = 5:1; <sup>1</sup>H NMR (600 MHz, DMSO-*d*<sub>6</sub>) δ = 9.40 (s, 1H), 7.40–7.34 (m, 6H), 7.31–7.27 (m, 7H), 6.87 (d, *J* = 7.6 Hz, 2H), 6.08 (s, 1H); <sup>13</sup>C NMR (150 MHz, DMSO-*d*<sub>6</sub>) δ = 191.0, 170.6, 162.5, 133.8, 130.4, 130.3, 129.8, 129.6, 129.5, 129.4, 129.4, 129.4, 129.4, 129.4, 129.1, 128.8, 128.8, 128.6, 128.6, 126.5, 126.5, 88.4, 57.9; HRMS (TOF ES<sup>+</sup>): m/z calcd for C<sub>24</sub>H<sub>17</sub>BrNaO<sub>3</sub> [(M+Na)<sup>+</sup>], 455.0253, found, 455.0252.

**2-(5-Oxo-2,3,4-triphenyl-2,5-dihydrofuran-2-yl)acetaldehyde oxime (10)**

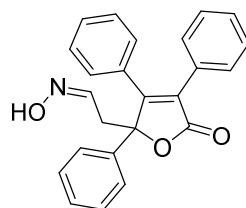

V<sub>Petroleum ether</sub>/V<sub>Ethyl acetate</sub> = 3:1, R<sub>f</sub> = 0.2; Yellow oil: 60 mg (81%); <sup>1</sup>H NMR (600 MHz, DMSO-*d*<sub>6</sub>) δ = 10.98 (s, 1H), 7.44–7.42 (m, 3H), 7.36–7.33 (m, 3H), 7.32–7.29 (m, 8H), 6.83 (d, *J* = 7.6 Hz, 2H), 3.32 (dd, *J* = 14.9, 5.9 Hz, 1H), 3.26 (dd, *J* = 14.9, 6.6 Hz, 1H); <sup>13</sup>C NMR (150 MHz, DMSO-*d*<sub>6</sub>) δ = 171.3, 164.2, 144.1, 136.8, 131.4, 130.0, 129.8, 129.5, 129.5, 129.5, 129.4, 129.4, 129.2, 129.1, 129.1, 128.8, 128.8, 128.6, 128.6, 127.3, 126.5, 126.5, 88.9, 35.1; HRMS (TOF ES<sup>+</sup>): m/z calcd for C<sub>24</sub>H<sub>19</sub>NNaO<sub>3</sub> [(M+Na)<sup>+</sup>], 392.1257, found, 392.1262.

**4-Methyl-*N'*-(2-(5-oxo-2,3,4-triphenyl-2,5-dihydrofuran-2-yl)ethylidene)benzenesulfonylhydrazide (11)**

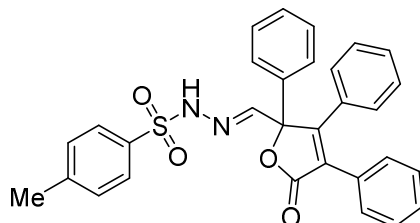

V<sub>Petroleum ether</sub>/V<sub>Ethyl acetate</sub> = 2:1, R<sub>f</sub> = 0.2; Yellow oil: 90 mg (86%); <sup>1</sup>H NMR (600 MHz, DMSO-*d*<sub>6</sub>) δ = 11.39 (s, 1H), 7.65 (d, *J* = 8.0 Hz, 2H), 7.38–7.28 (m, 7H), 7.28–7.23 (m, 5H), 7.18 (d, *J* = 7.4 Hz, 2H), 7.14 (t, *J* = 7.7 Hz, 2H), 6.49 (d, *J* = 7.7 Hz, 2H), 3.32 (dd, *J* = 15.0, 4.5 Hz, 1H), 3.18 (dd, *J* = 15.0, 6.9 Hz, 1H), 2.26 (s, 3H); <sup>13</sup>C NMR

(150 MHz, DMSO-*d*<sub>6</sub>)  $\delta$  = 171.1, 163.9, 145.7, 143.7, 136.7, 136.6, 131.0, 130.2, 130.2, 129.7, 129.7, 129.6, 129.6, 129.6, 129.4, 129.3, 129.2, 129.2, 128.9, 128.9, 128.6, 128.6, 128.6, 128.4, 128.4, 127.5, 127.5, 127.3, 126.3, 126.3, 88.8, 37.5, 21.4; HRMS (TOF ES<sup>+</sup>): *m/z* calcd for C<sub>31</sub>H<sub>26</sub>N<sub>2</sub>NaO<sub>4</sub>S [(M+Na)<sup>+</sup>], 545.1505, found, 545.1512.

**5-(2-Hydroxy-2-phenylethyl)-3,4-diphenyl-1-(*p*-tolyl)-1,5-dihydro-2*H*-pyrrol-2-one (12)**

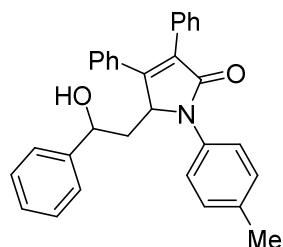

V<sub>Petroleum ether</sub>/V<sub>Ethyl acetate</sub> = 4:1, R<sub>f</sub> = 0.1; White solid: 74 mg (83%); mp > 250 °C; d/r > 20:1; <sup>1</sup>H NMR (600 MHz, CDCl<sub>3</sub>)  $\delta$  = 7.44 (d, *J* = 8.0 Hz, 2H), 7.42–7.40 (m, 2H), 7.39–7.37 (m, 3H), 7.36–7.34 (m, 2H), 7.31–7.28 (m, 3H), 7.24–7.20 (m, 5H), 6.93–6.89 (m, 2H), 5.43–5.41 (m, 1H), 4.33–4.31 (m, 1H), 2.37 (s, 3H), 2.23–2.18 (m, 1H), 2.07–2.03 (m, 1H); <sup>13</sup>C NMR (150 MHz, CDCl<sub>3</sub>)  $\delta$  = 168.4, 153.1, 143.6, 134.7, 134.3, 133.3, 132.5, 131.2, 129.8, 129.8, 129.6, 129.6, 129.1, 128.8, 128.8, 128.8, 128.8, 128.5, 128.5, 128.1, 128.1, 128.0, 127.8, 125.6, 125.6, 122.7, 122.7, 70.2, 59.7, 39.4, 21.0; HRMS (TOF ES<sup>+</sup>): *m/z* calcd for C<sub>31</sub>H<sub>27</sub>NNaO<sub>2</sub> [(M+Na)<sup>+</sup>], 468.1934, found, 468.1943.

Failed examples:

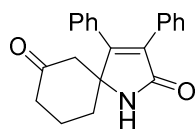

## 5. X-ray Structure and Data.

### 5.1 X-ray Structure and Data<sup>5</sup> of 3v (CCDC 2377854).

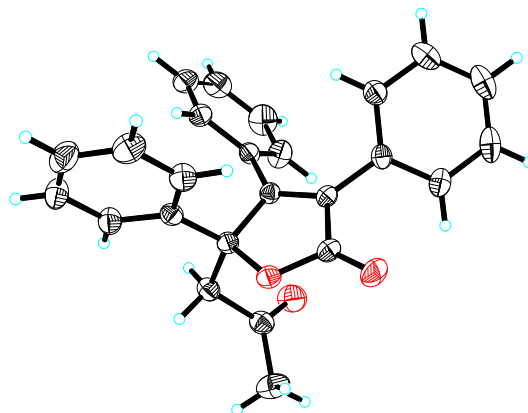

Figure S2 X-Ray crystal structure of 3v.

Table S3 Crystal data and structure refinement for 3v.

|                                   |                                                |                       |
|-----------------------------------|------------------------------------------------|-----------------------|
| Empirical formula                 | C <sub>25</sub> H <sub>20</sub> O <sub>3</sub> |                       |
| Formula weight                    | 368.41                                         |                       |
| Temperature                       | 300.00 K                                       |                       |
| Crystal system, space group       | Monoclinic, P2 <sub>1</sub> /c                 |                       |
| Unit cell dimensions              | a = 10.2274(4) Å                               | alpha = 90 deg.       |
|                                   | b = 13.5230(5) Å                               | beta = 90.829(2) deg. |
|                                   | c = 14.2522(7) Å                               | gamma = 90 deg.       |
| Volume                            | 1970.95(14) Å <sup>3</sup>                     |                       |
| Z, Calculated density             | 4, 1.242 Mg/m <sup>3</sup>                     |                       |
| Absorption coefficient            | 0.081 mm <sup>-1</sup>                         |                       |
| F(000)                            | 776.0                                          |                       |
| Theta range for data collection   | 3.982 to 56.604 deg.                           |                       |
| Limiting indices                  | -13 ≤ h ≤ 13, -18 ≤ k ≤ 18, -18 ≤ l ≤ 19       |                       |
| Reflections collected / unique    | 53825                                          |                       |
| Data/restraints/parameters        | 4901 / 0 / 254                                 |                       |
| Goodness-of-fit on F <sup>2</sup> | 1.056                                          |                       |
| Final R indices [I > 2σ(I)]       | R1 = 0.0438, wR2 = 0.1161                      |                       |
| R indices (all data)              | R1 = 0.0612, wR2 = 0.1303                      |                       |
| Largest diff. peak and hole       | 0.18 and -0.20 e.Å <sup>-3</sup>               |                       |

## 5.2 X-ray Structure and Data<sup>6</sup> of 5b (CCDC 2391288).

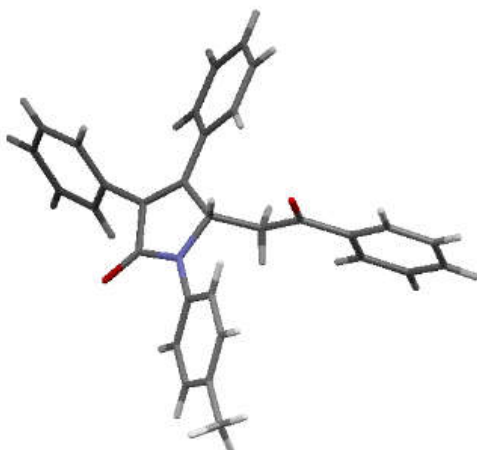

Figure S3 X-Ray crystal structure of **5b**.

Table S4 Crystal data and structure refinement for **5b**.

|                                   |                                                                                                                             |
|-----------------------------------|-----------------------------------------------------------------------------------------------------------------------------|
| Empirical formula                 | C <sub>31</sub> H <sub>25</sub> NO <sub>2</sub>                                                                             |
| Formula weight                    | 443.52                                                                                                                      |
| Temperature                       | 296.15 K                                                                                                                    |
| Crystal system, space group       | Monoclinic, C2/c                                                                                                            |
| Unit cell dimensions              | a = 38.980(3) Å      alpha = 90 deg.<br>b = 5.8496(5) Å      beta = 118.940(3) deg.<br>c = 25.600(3) Å      gamma = 90 deg. |
| Volume                            | 5108.3(8) Å <sup>3</sup>                                                                                                    |
| Z, Calculated density             | 8, 1.153 Mg/m <sup>3</sup>                                                                                                  |
| Absorption coefficient            | 0.072 mm <sup>-1</sup>                                                                                                      |
| F(000)                            | 1872.0                                                                                                                      |
| Theta range for data collection   | 2.388 to 54.994 deg.                                                                                                        |
| Limiting indices                  | -50 ≤ h ≤ 40, -7 ≤ k ≤ 7, -28 ≤ l ≤ 33                                                                                      |
| Reflections collected / unique    | 14699                                                                                                                       |
| Data/restraints/parameters        | 5794 / 0 / 308                                                                                                              |
| Goodness-of-fit on F <sup>2</sup> | 0.963                                                                                                                       |
| Final R indices [I > 2σ(I)]       | R1 = 0.0488, wR2 = 0.1145                                                                                                   |
| R indices (all data)              | R1 = 0.0827, wR2 = 0.1328                                                                                                   |
| Largest diff. peak and hole       | 0.22 and -0.24 e.Å <sup>-3</sup>                                                                                            |

### 5.3 X-ray Structure and Data<sup>7</sup> of 7a (CCDC 2391289).

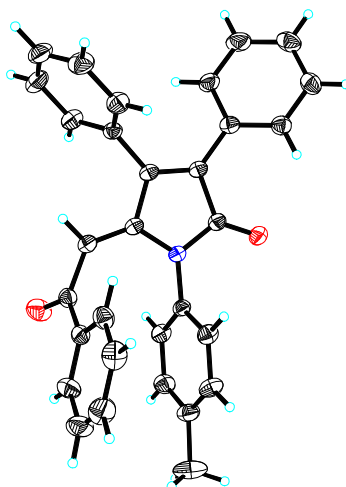

**Figure S4** X-Ray crystal structure of **7a**.

**Table S5** Crystal data and structure refinement for **7a**.

|                                   |                                                                                                                        |
|-----------------------------------|------------------------------------------------------------------------------------------------------------------------|
| Empirical formula                 | C <sub>31</sub> H <sub>23</sub> NO <sub>2</sub>                                                                        |
| Formula weight                    | 441.50                                                                                                                 |
| Temperature                       | 303.00 K                                                                                                               |
| Crystal system, space group       | Orthorhombic, Pca2 <sub>1</sub>                                                                                        |
| Unit cell dimensions              | a = 26.0297(16) Å      alpha = 90 deg.<br>b = 5.9625(3) Å      beta = 90 deg.<br>c = 15.3428(9) Å      gamma = 90 deg. |
| Volume                            | 2381.2(2) Å <sup>3</sup>                                                                                               |
| Z, Calculated density             | 4, 1.232 Mg/m <sup>3</sup>                                                                                             |
| Absorption coefficient            | 0.077 mm <sup>-1</sup>                                                                                                 |
| F(000)                            | 928.0                                                                                                                  |
| Theta range for data collection   | 5.31 to 56.574 deg.                                                                                                    |
| Limiting indices                  | -34 ≤ h ≤ 34, -7 ≤ k ≤ 7, -20 ≤ l ≤ 20                                                                                 |
| Reflections collected / unique    | 53825                                                                                                                  |
| Data/restraints/parameters        | 5846 / 1 / 309                                                                                                         |
| Goodness-of-fit on F <sup>2</sup> | 1.093                                                                                                                  |
| Final R indices [I > 2σ(I)]       | R1 = 0.0451, wR2 = 0.0929                                                                                              |
| R indices (all data)              | R1 = 0.0656, wR2 = 0.1099                                                                                              |
| Largest diff. peak and hole       | 0.12 and -0.18 e.Å <sup>-3</sup>                                                                                       |



**6.  $^1\text{H}$  NMR and  $^{13}\text{C}$  NMR spectra for spectroscopic data.**

ZZL-137.1.fid

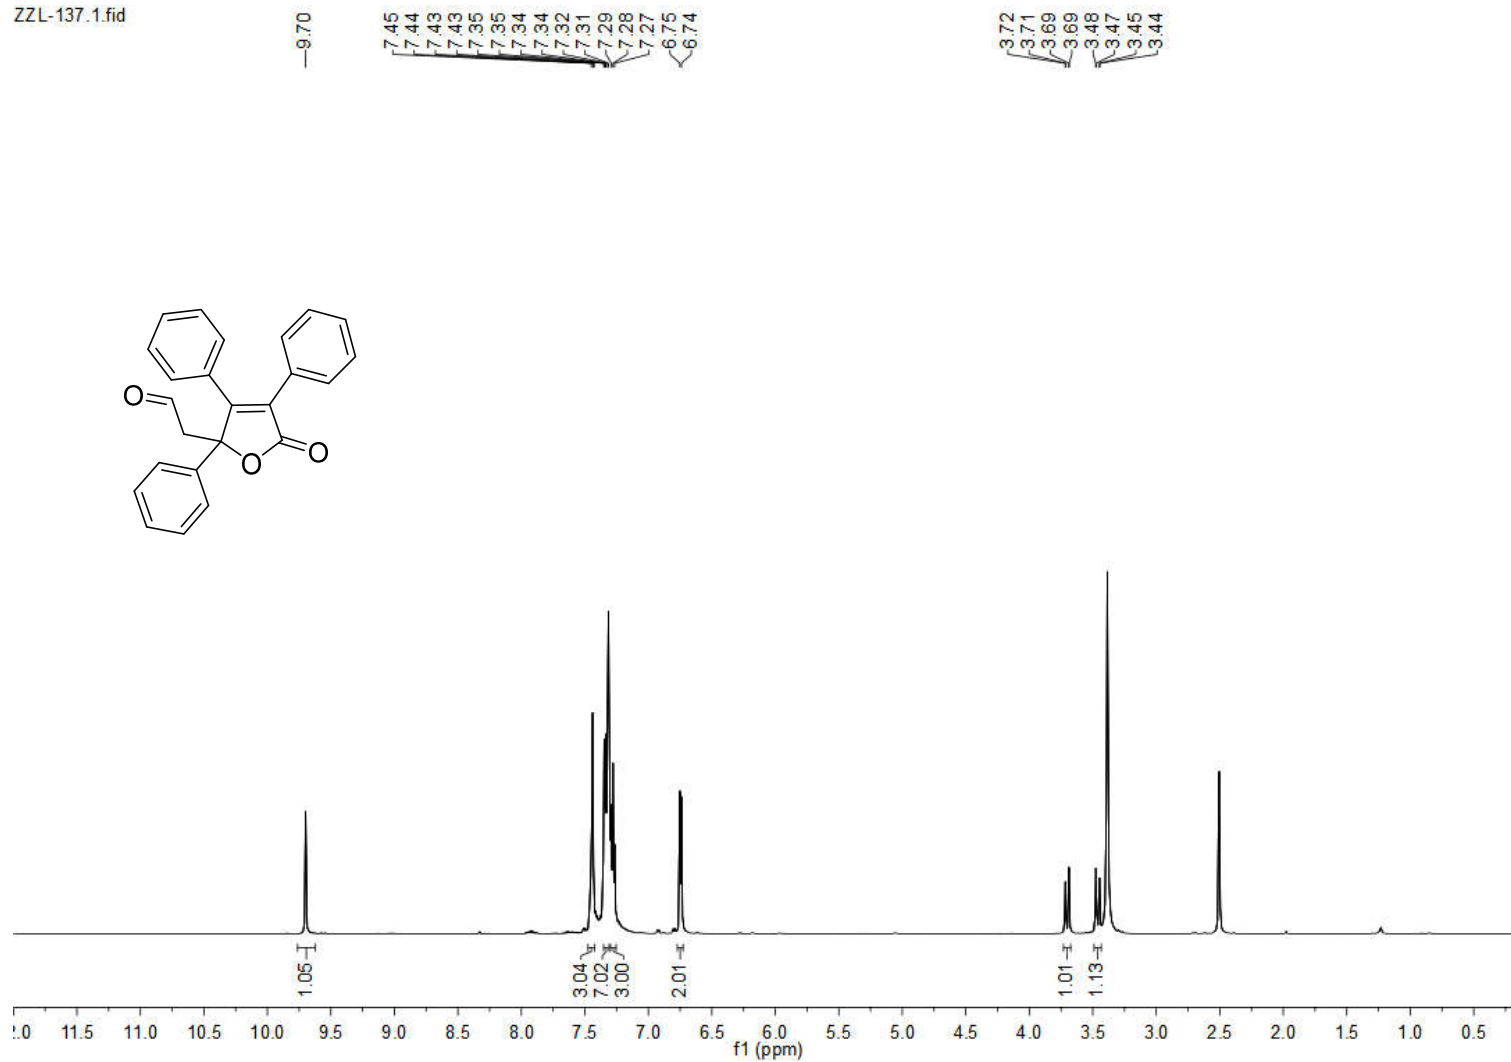

Figure S5. <sup>1</sup>H NMR (600 MHz, DMSO-*d*<sub>6</sub>) spectra of compound 3a

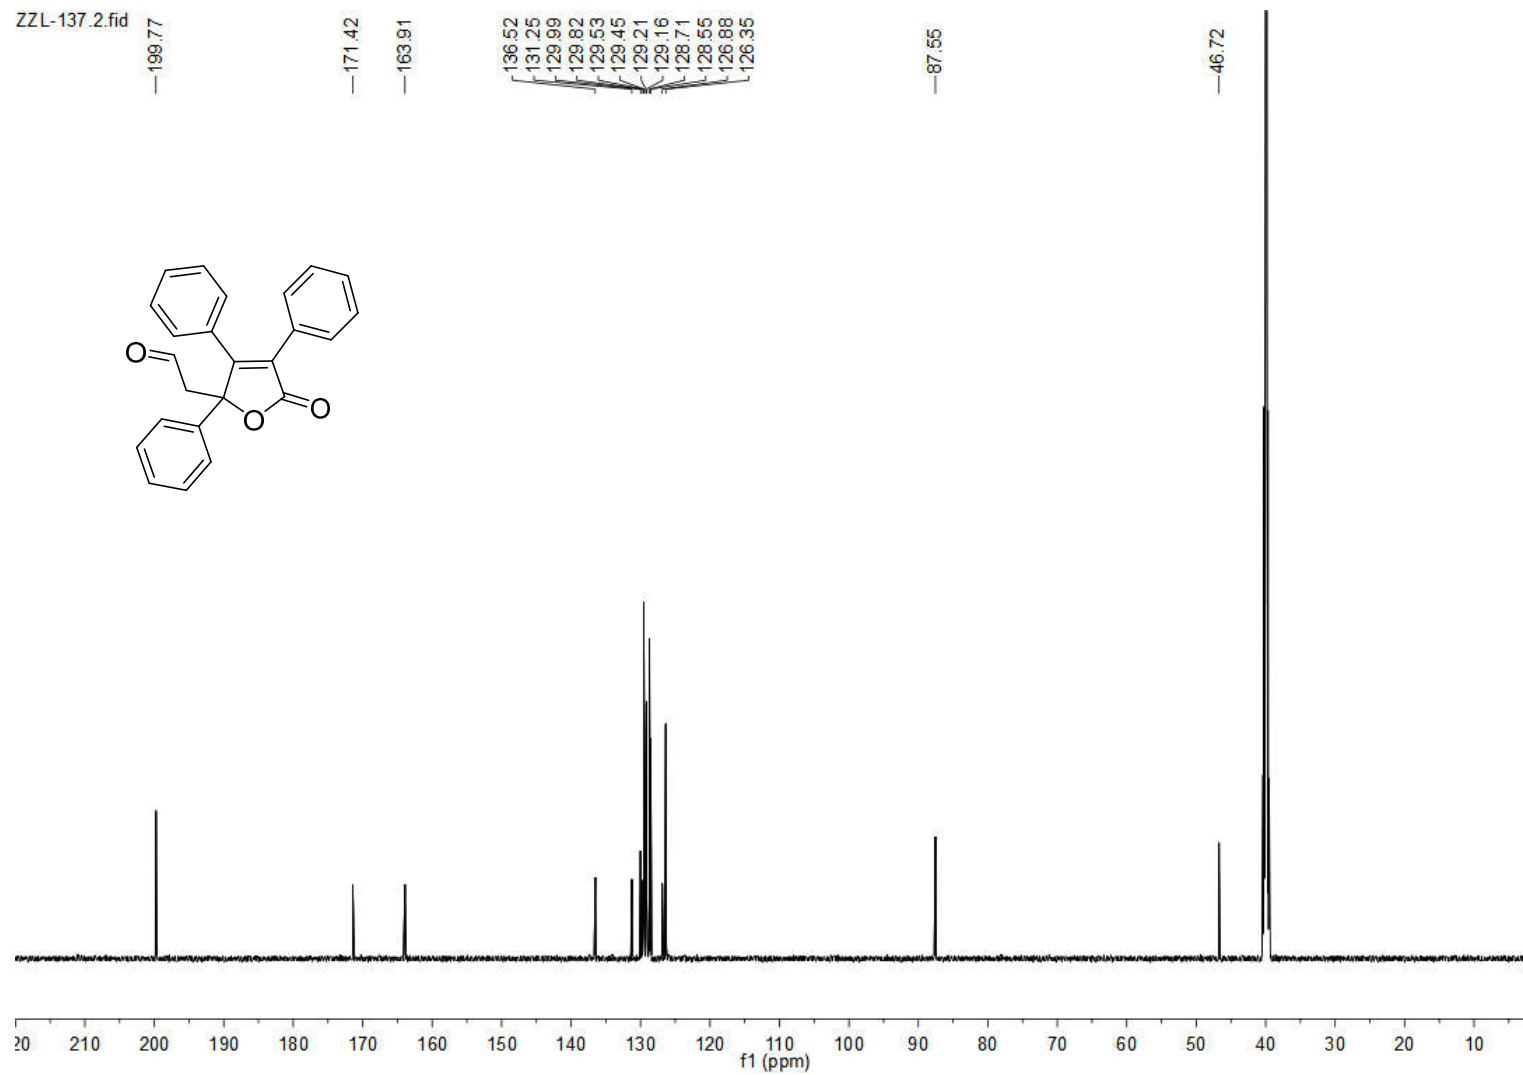

Figure S6.  $^{13}\text{C}$  NMR (150 MHz,  $\text{DMSO-}d_6$ ) spectra of compound 3a

ZZL-152.1.fid

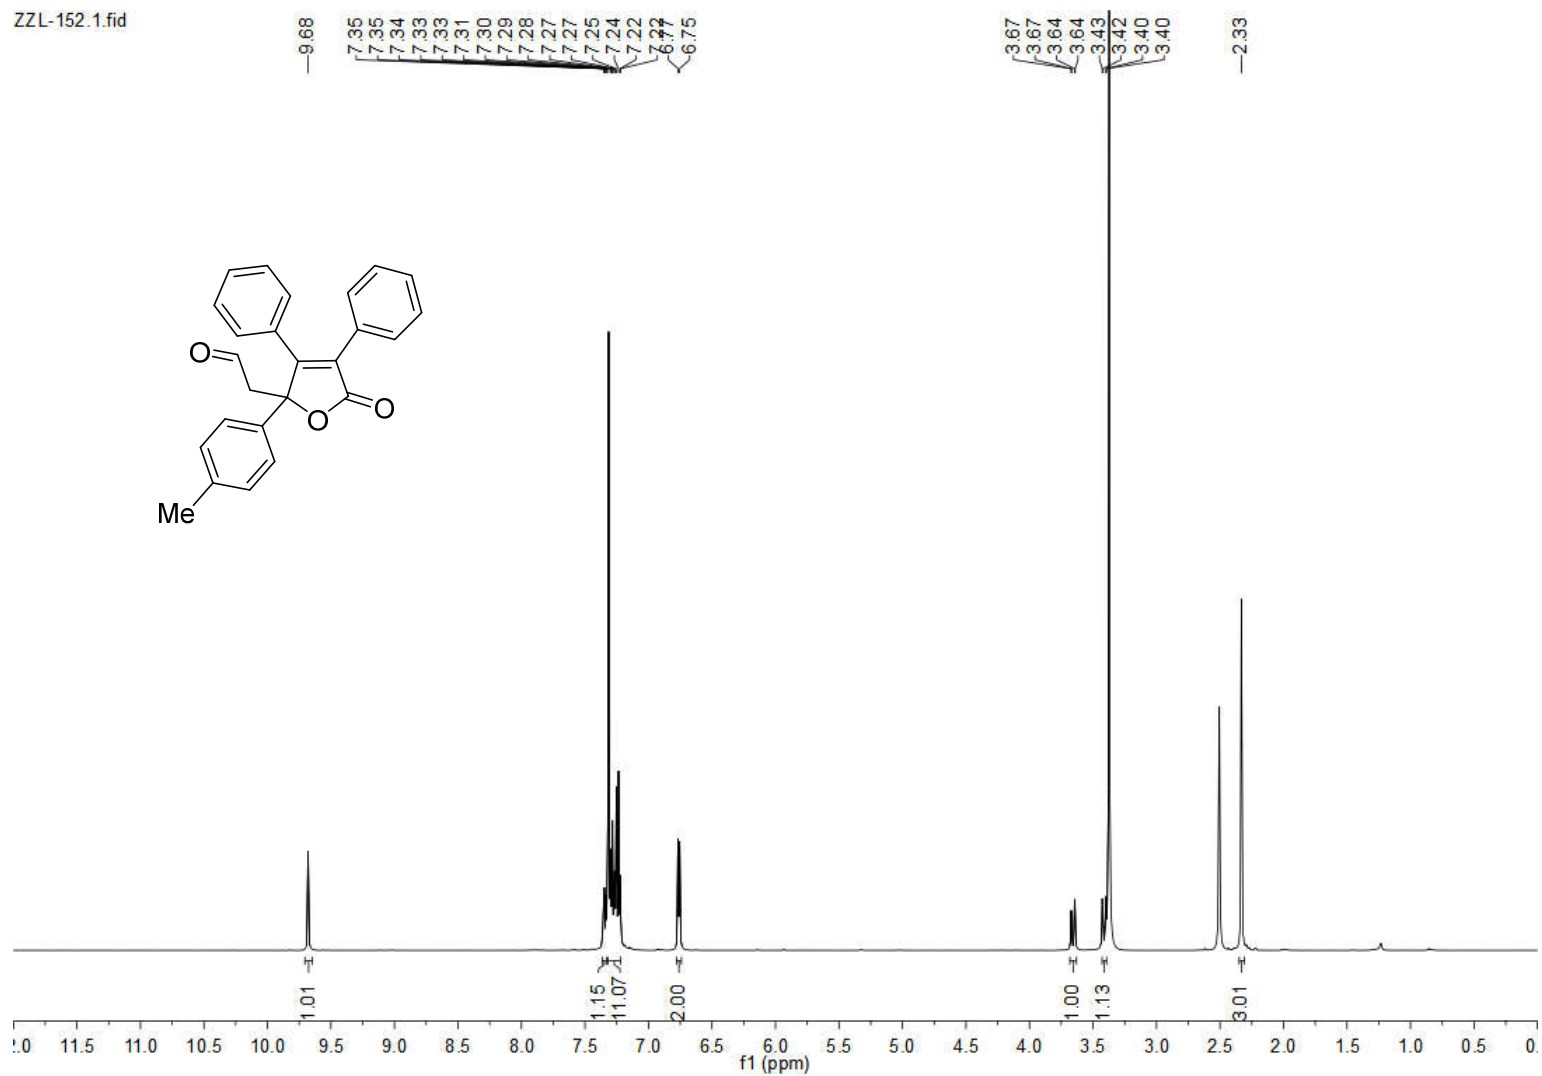

Figure S7. <sup>1</sup>H NMR (600 MHz, DMSO-*d*<sub>6</sub>) spectra of compound **3b**

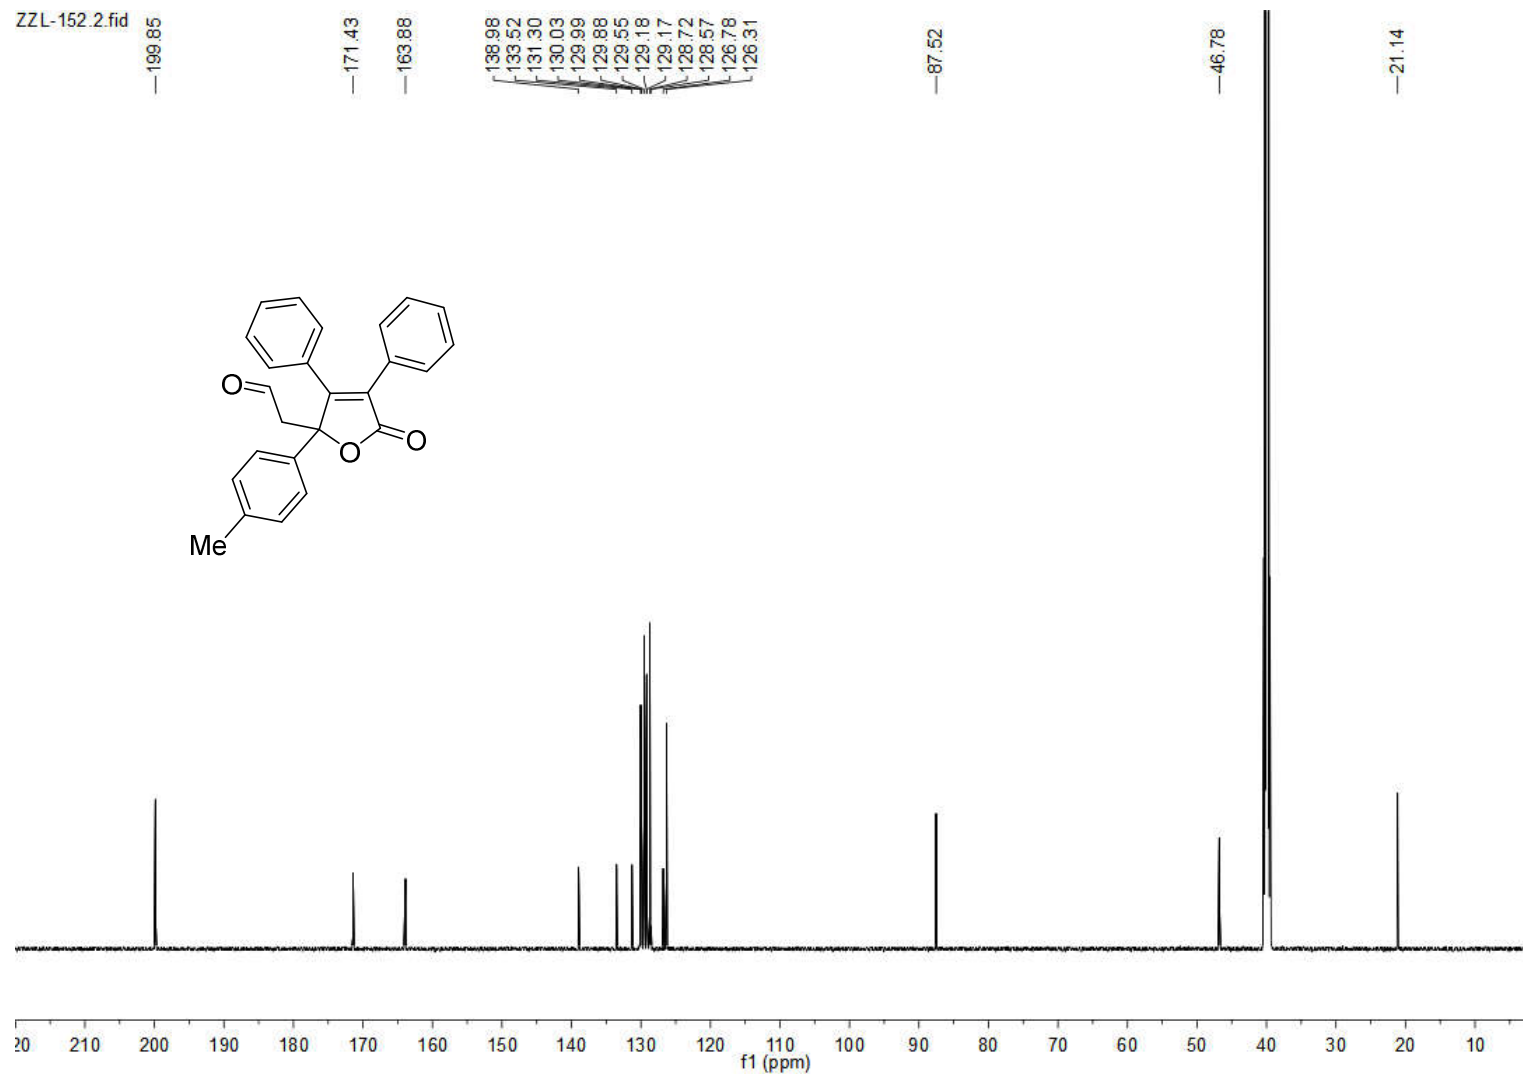

**Figure S8.**  $^{13}\text{C}$  NMR (150 MHz,  $\text{DMSO-}d_6$ ) spectra of compound **3b**

ZZL-165.1.fid

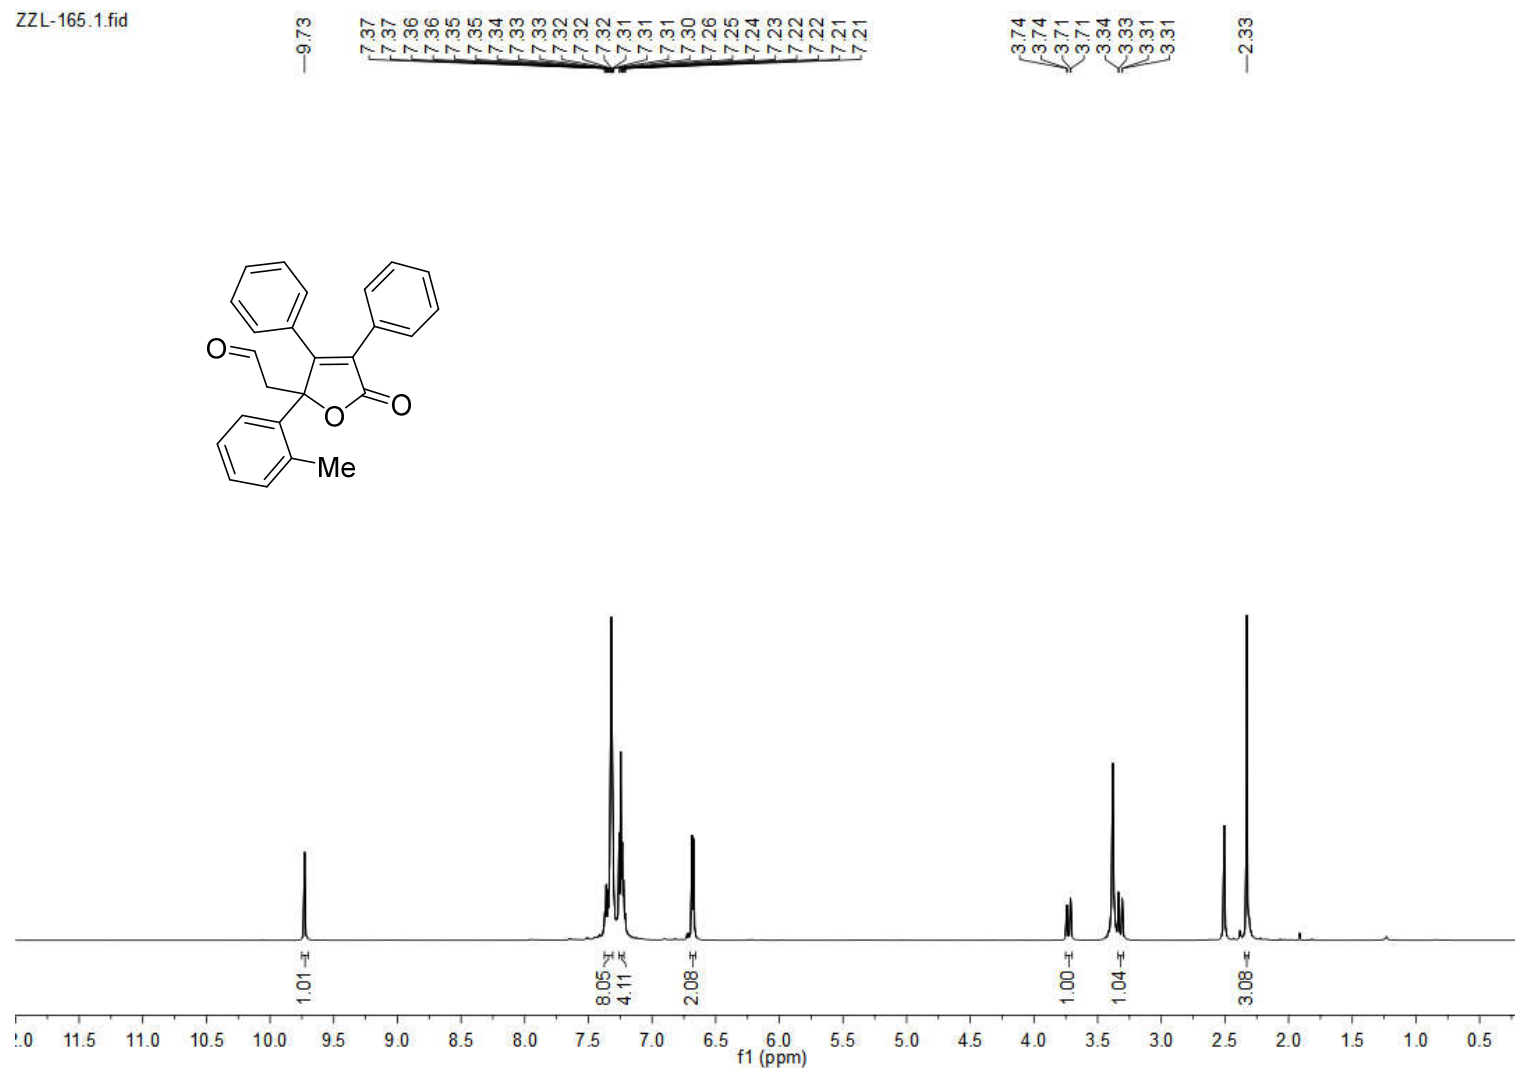

Figure S9. <sup>1</sup>H NMR (600 MHz, DMSO-*d*<sub>6</sub>) spectra of compound 3c

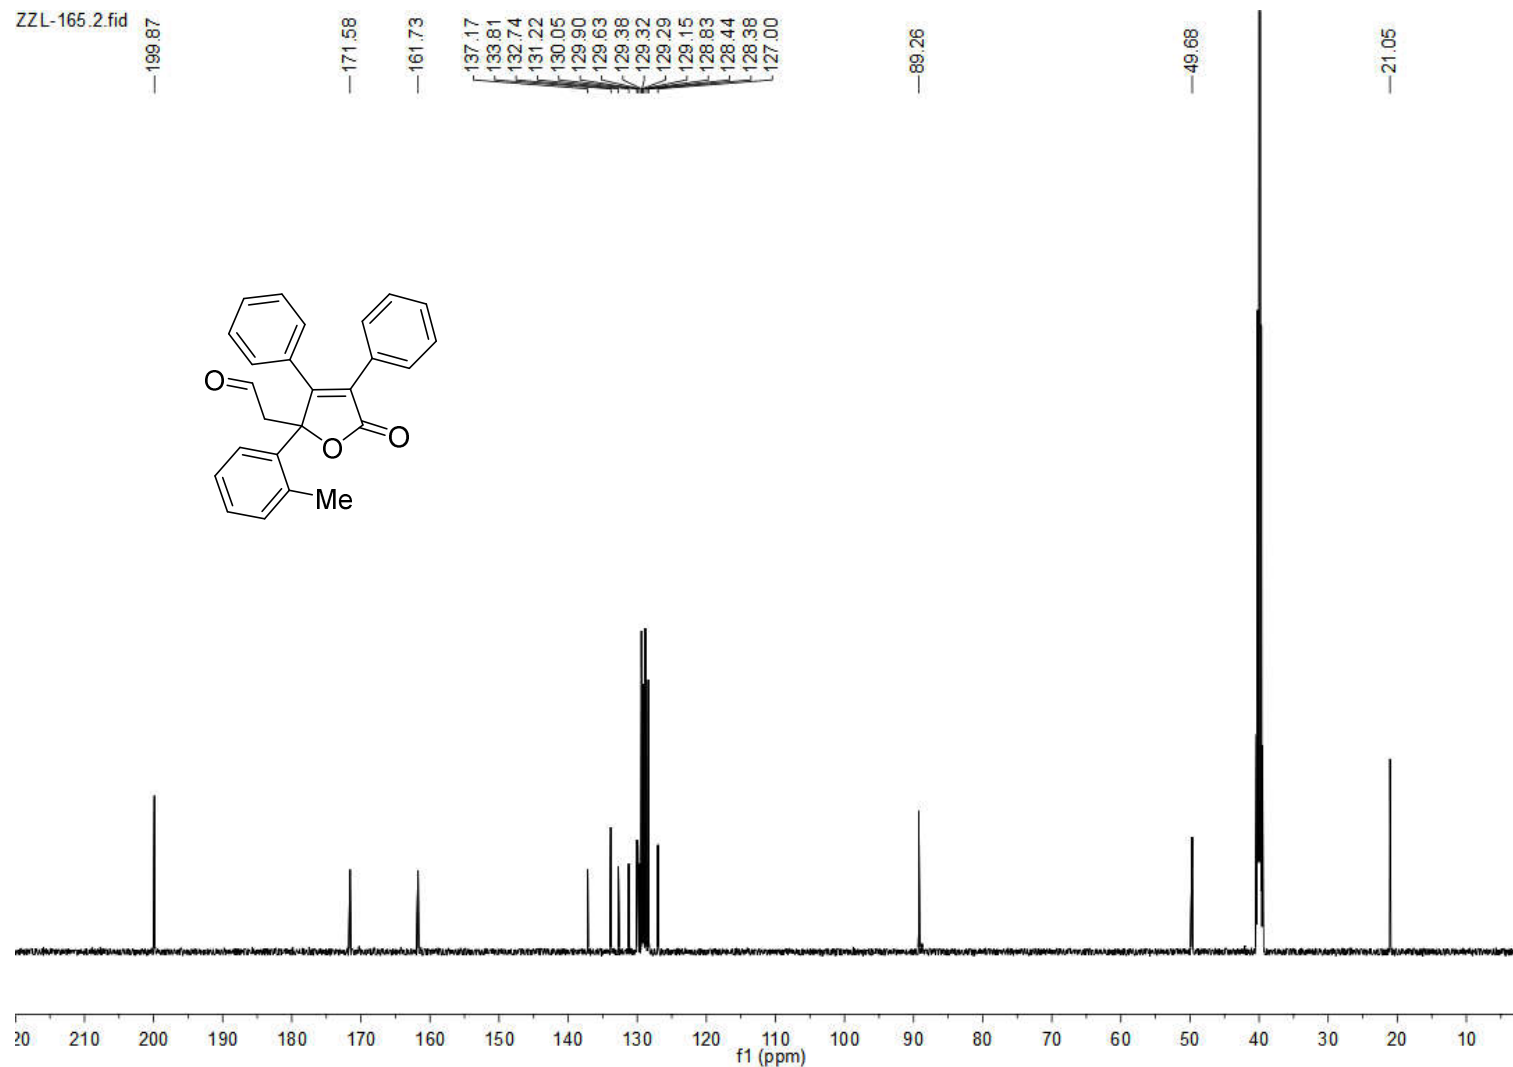

Figure S10.  $^{13}\text{C}$  NMR (150 MHz,  $\text{DMSO-}d_6$ ) spectra of compound 3c

ZZL-163.1.fid

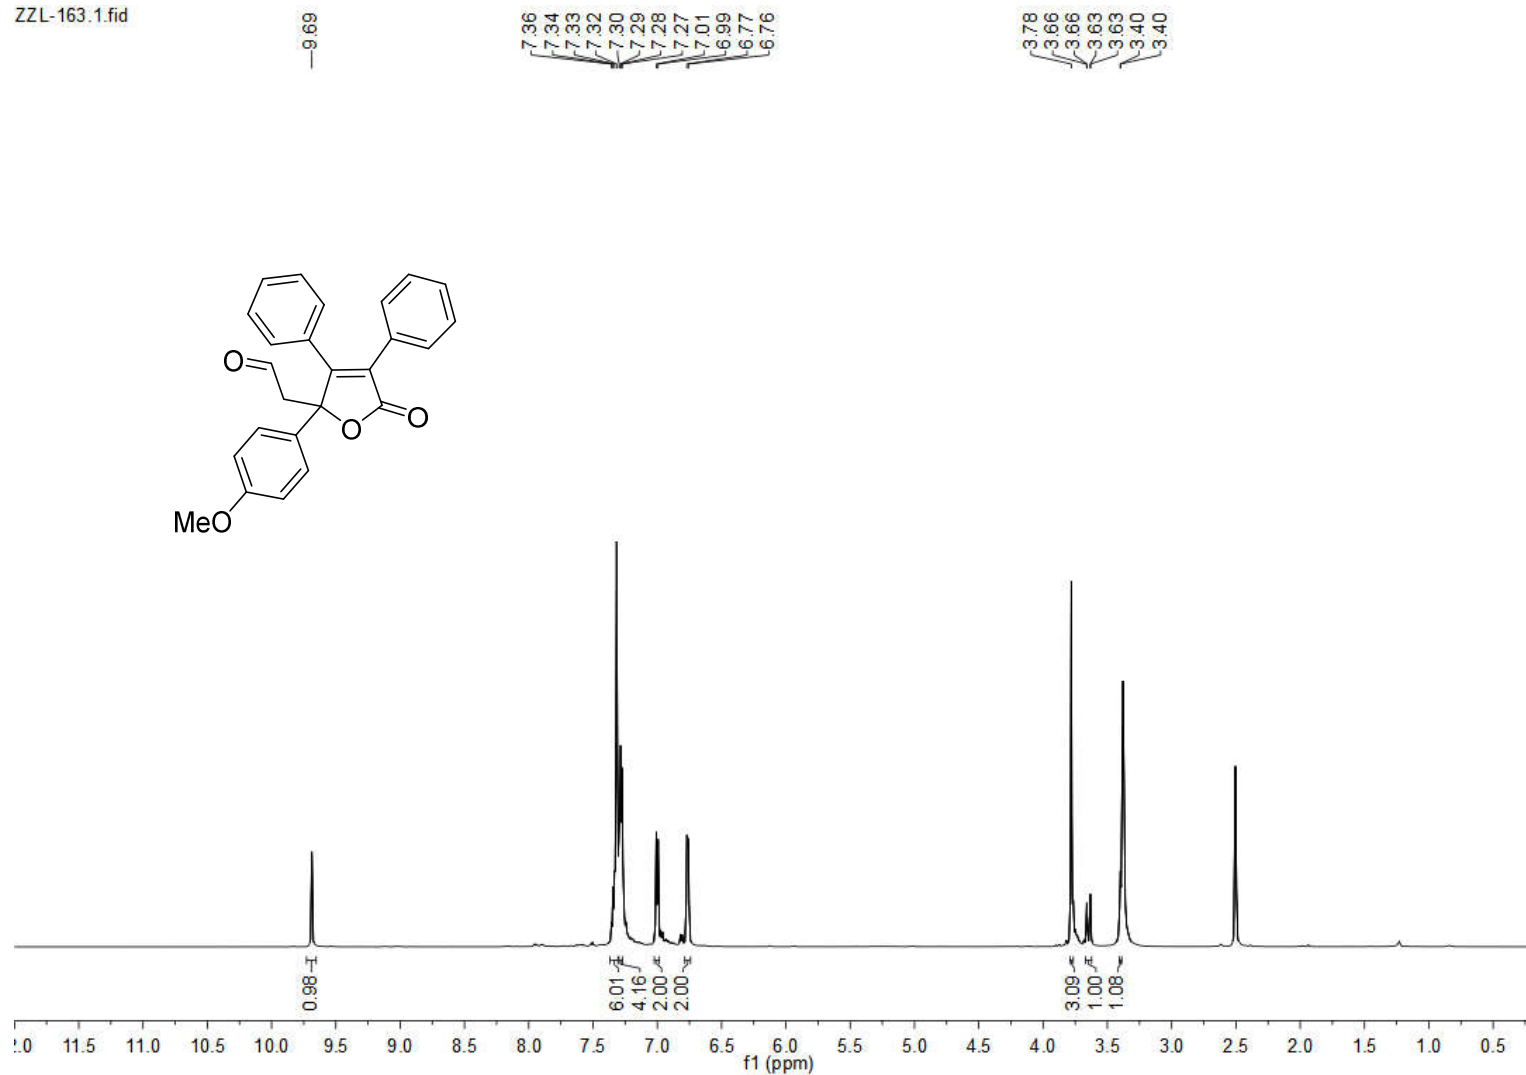

Figure S11. <sup>1</sup>H NMR (600 MHz, DMSO-*d*<sub>6</sub>) spectra of compound 3d



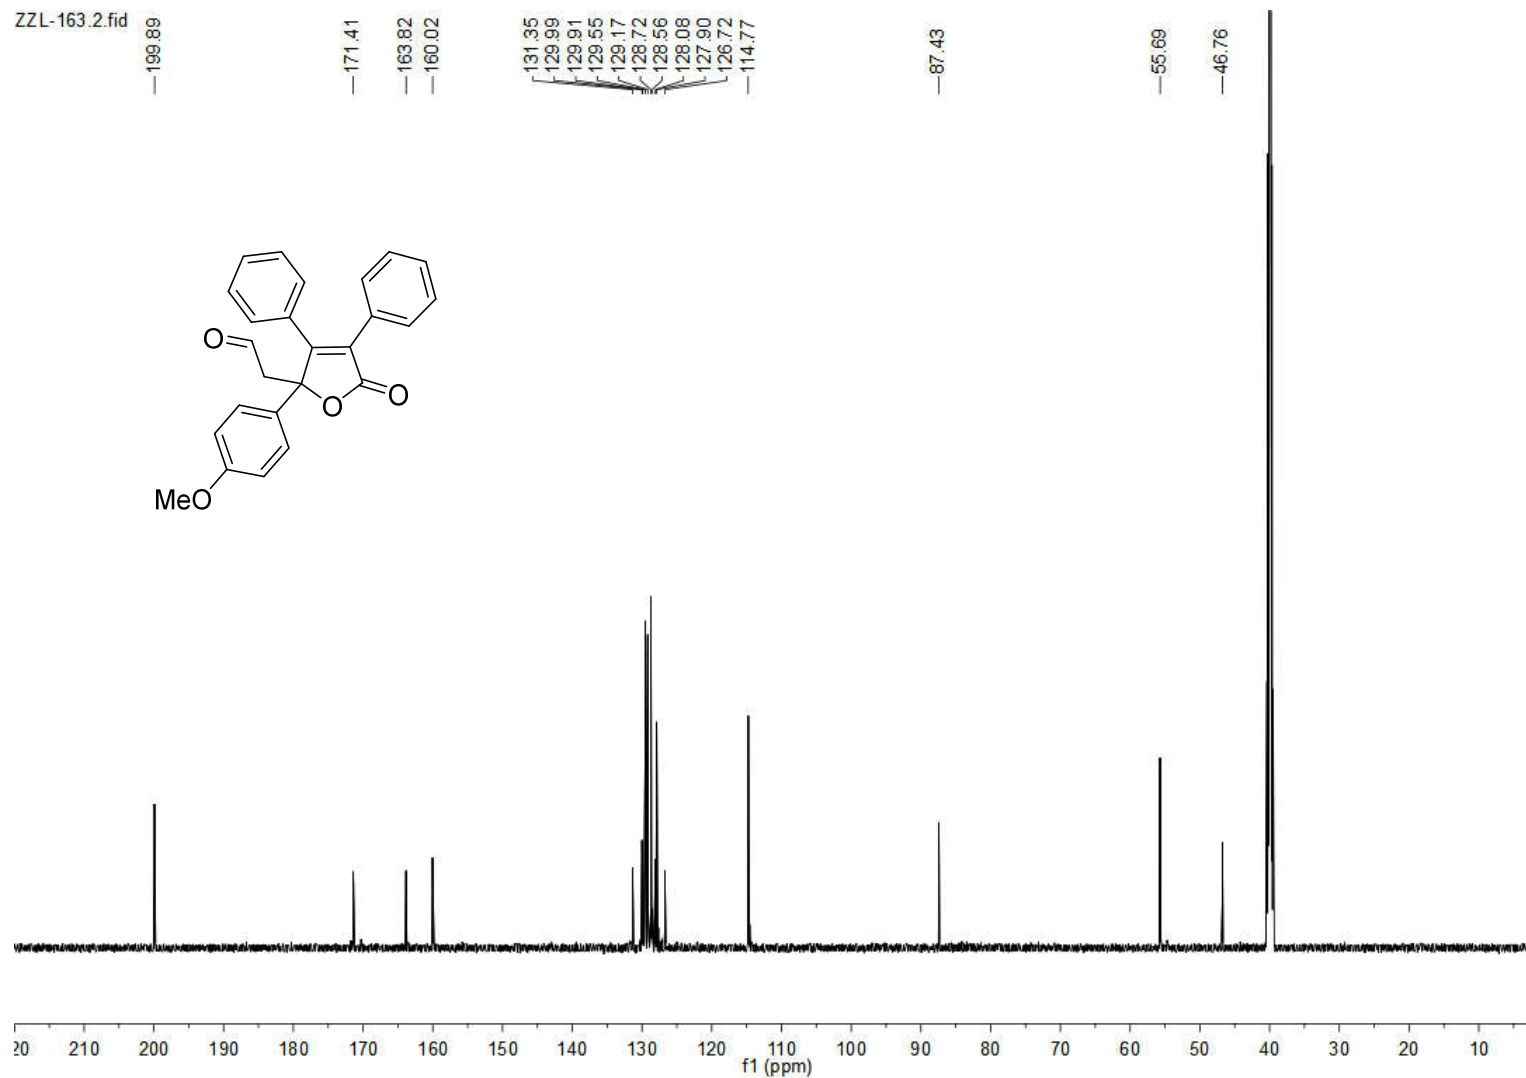

**Figure S12.**  $^{13}\text{C}$  NMR (150 MHz,  $\text{DMSO-}d_6$ ) spectra of compound **3d**

ZZL-160.1.fid

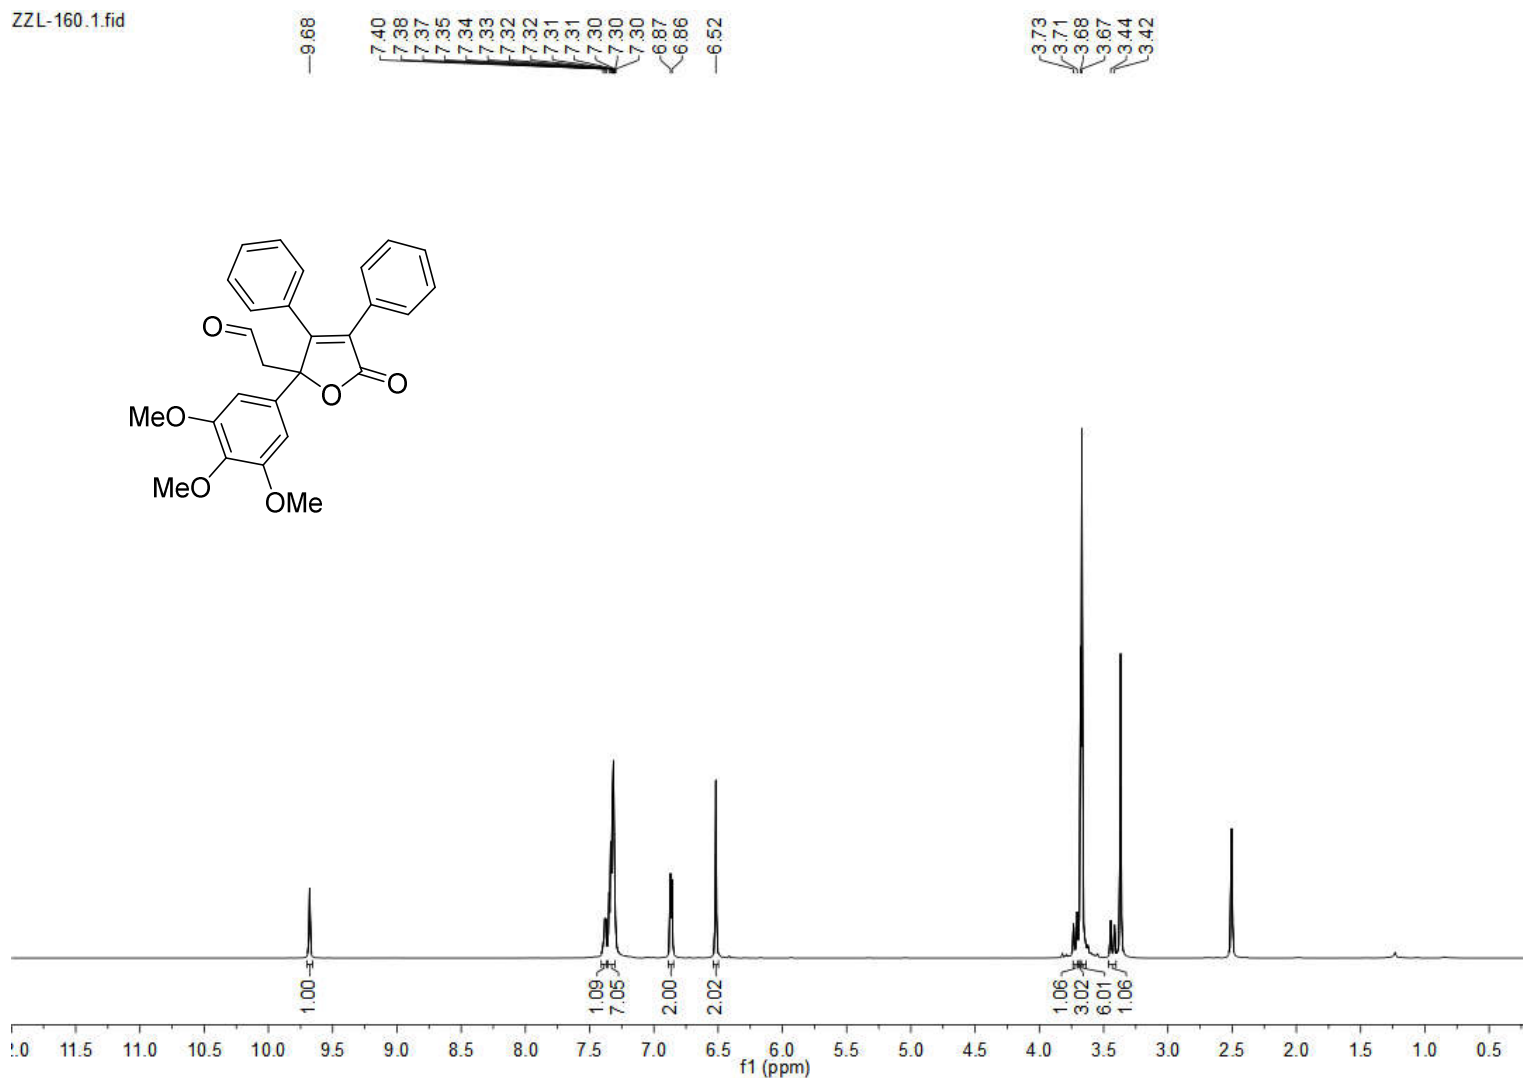

Figure S13. <sup>1</sup>H NMR (600 MHz, DMSO-*d*<sub>6</sub>) spectra of compound 3e

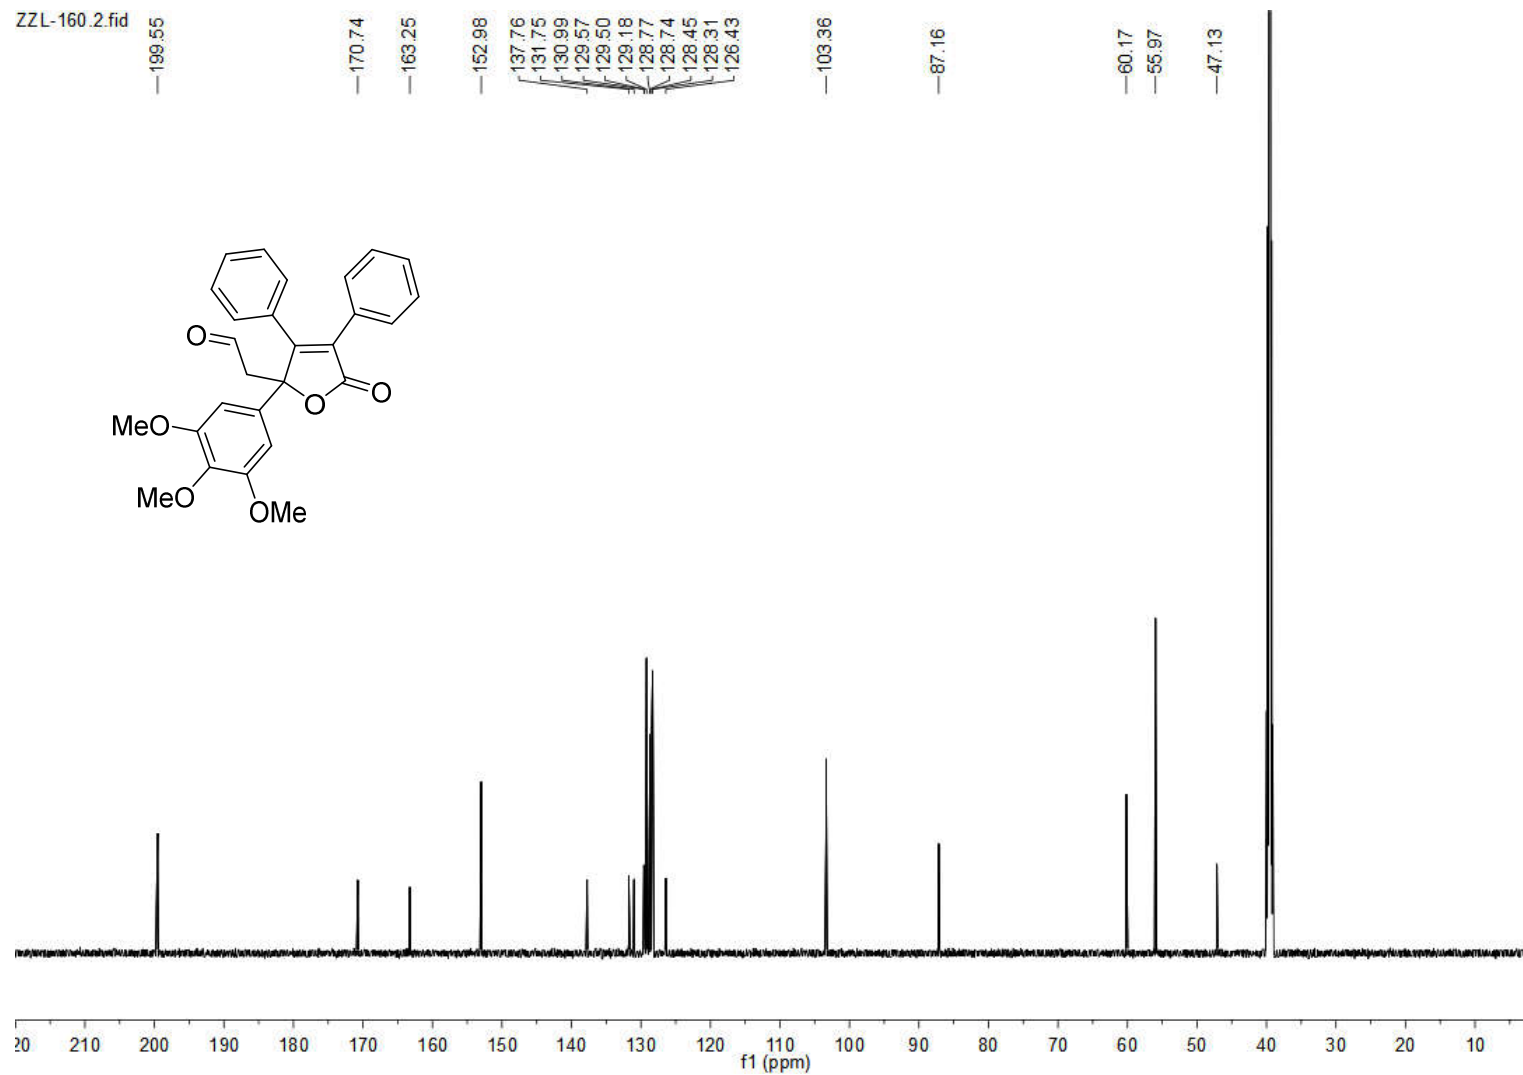

Figure S14.  $^{13}\text{C}$  NMR (150 MHz,  $\text{DMSO-}d_6$ ) spectra of compound **3e**

ZZL-170.1.fid

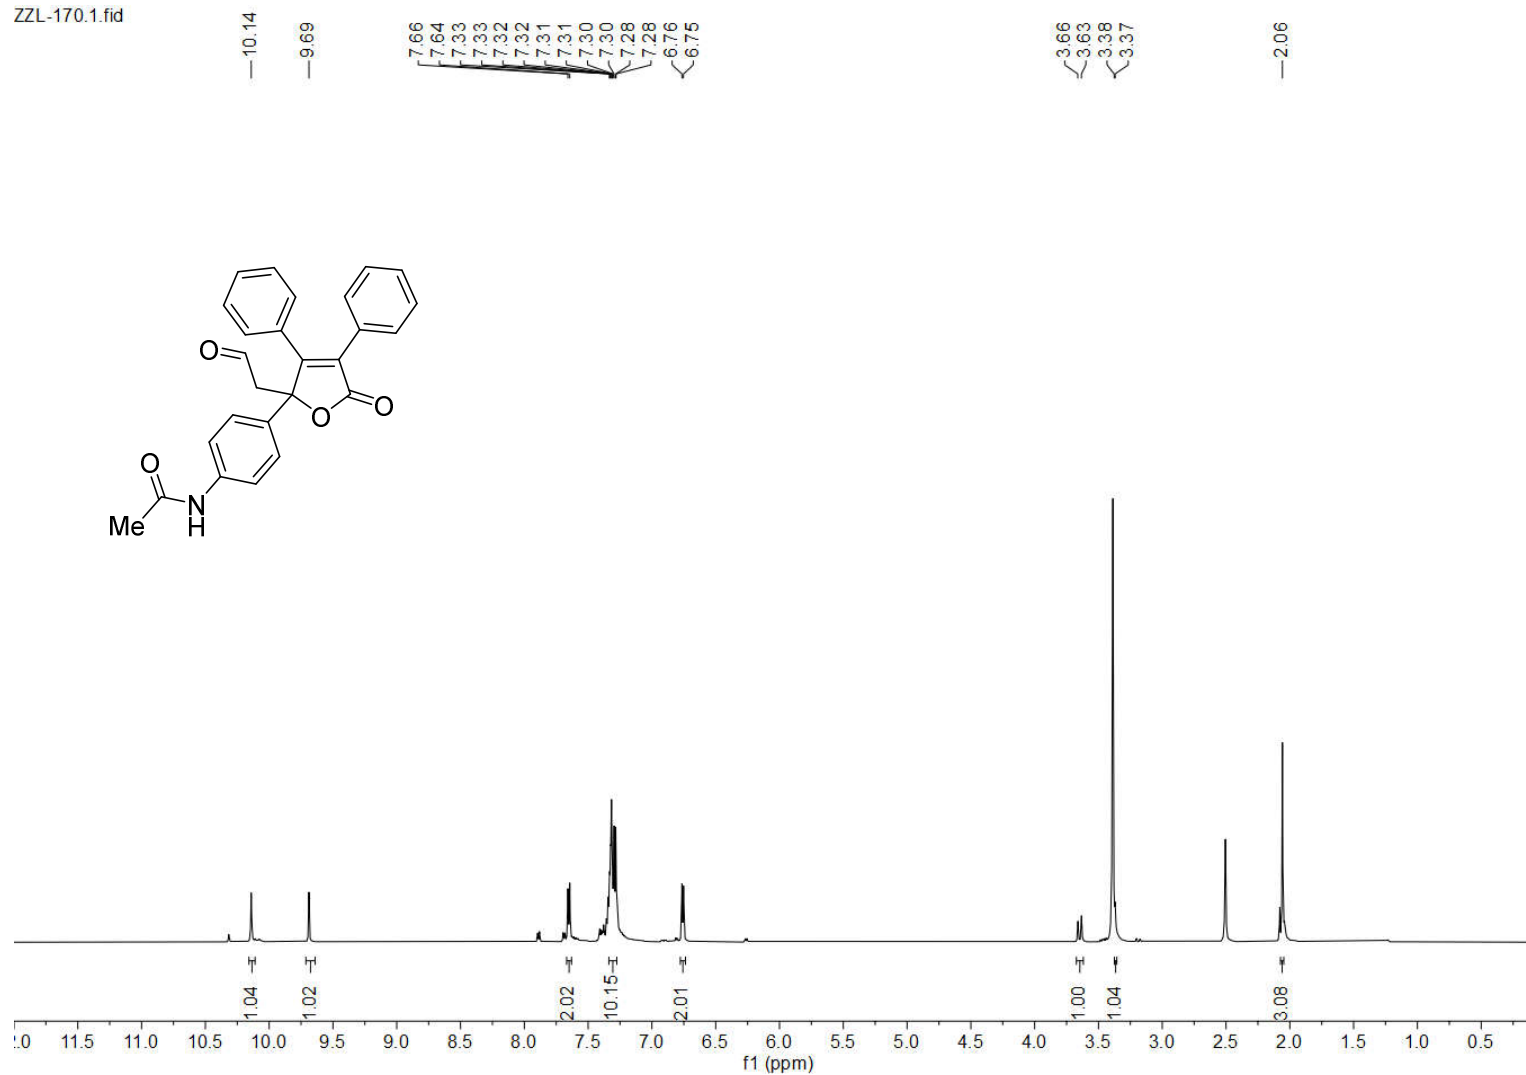

Figure S15.  $^1\text{H}$  NMR (600 MHz,  $\text{DMSO-}d_6$ ) spectra of compound 3f

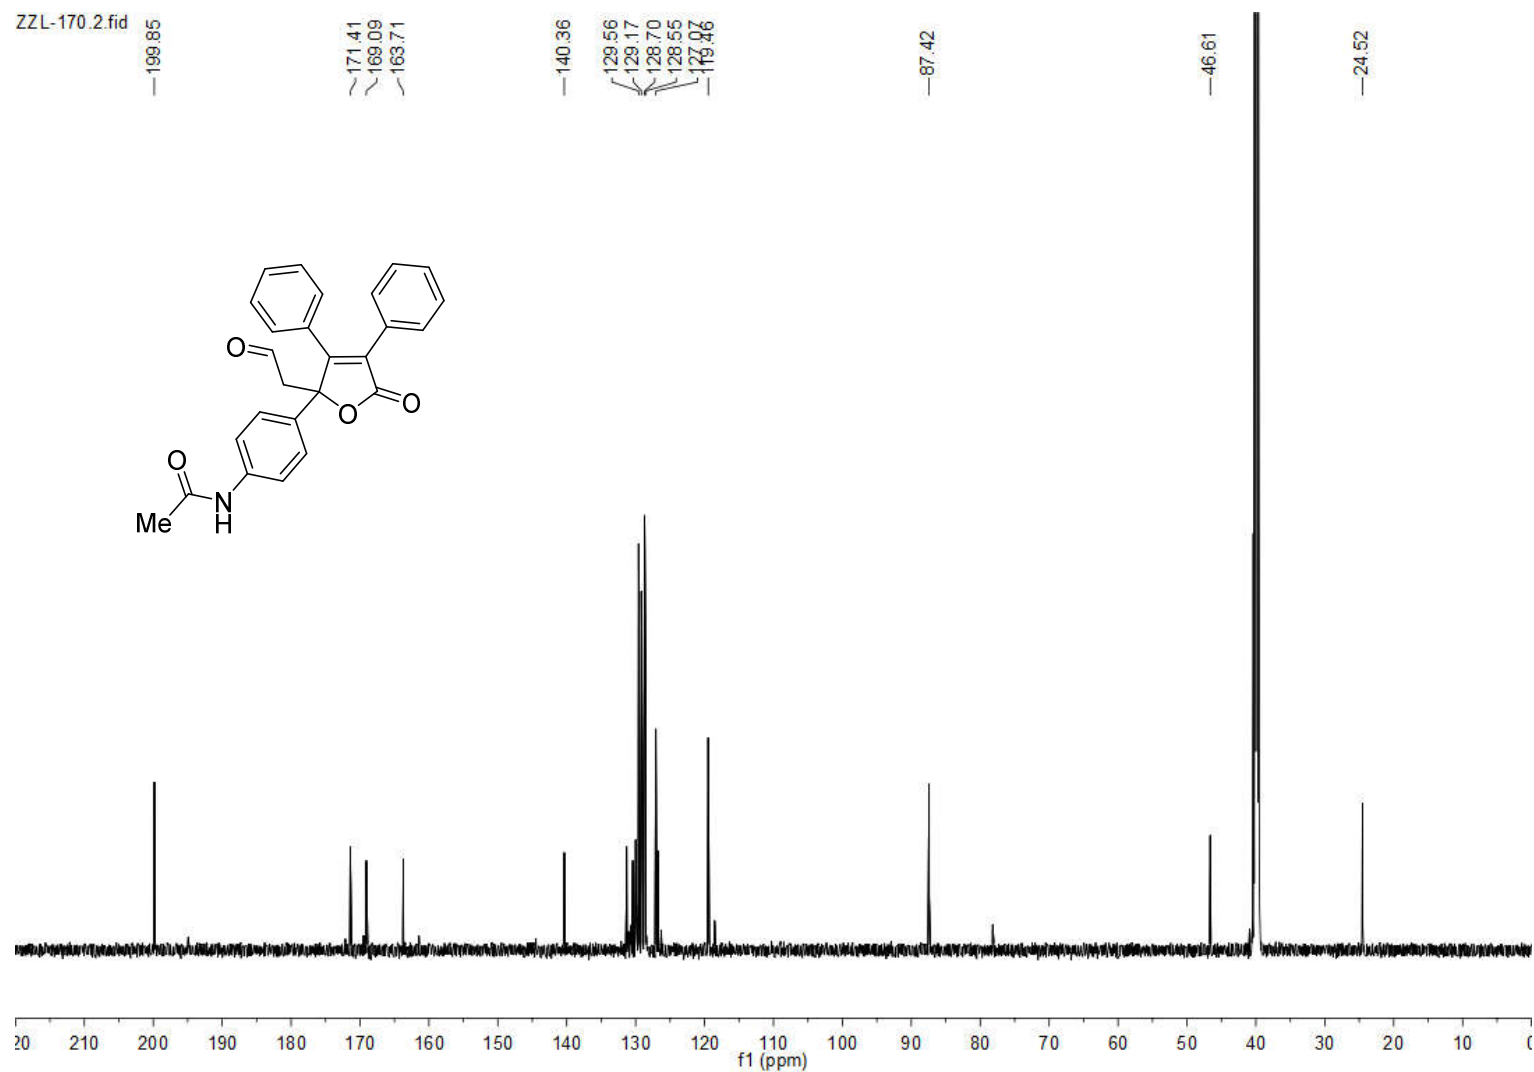

Figure S16.  $^{13}\text{C}$  NMR (150 MHz,  $\text{DMSO-}d_6$ ) spectra of compound 3f

ZZL-150.1.fid

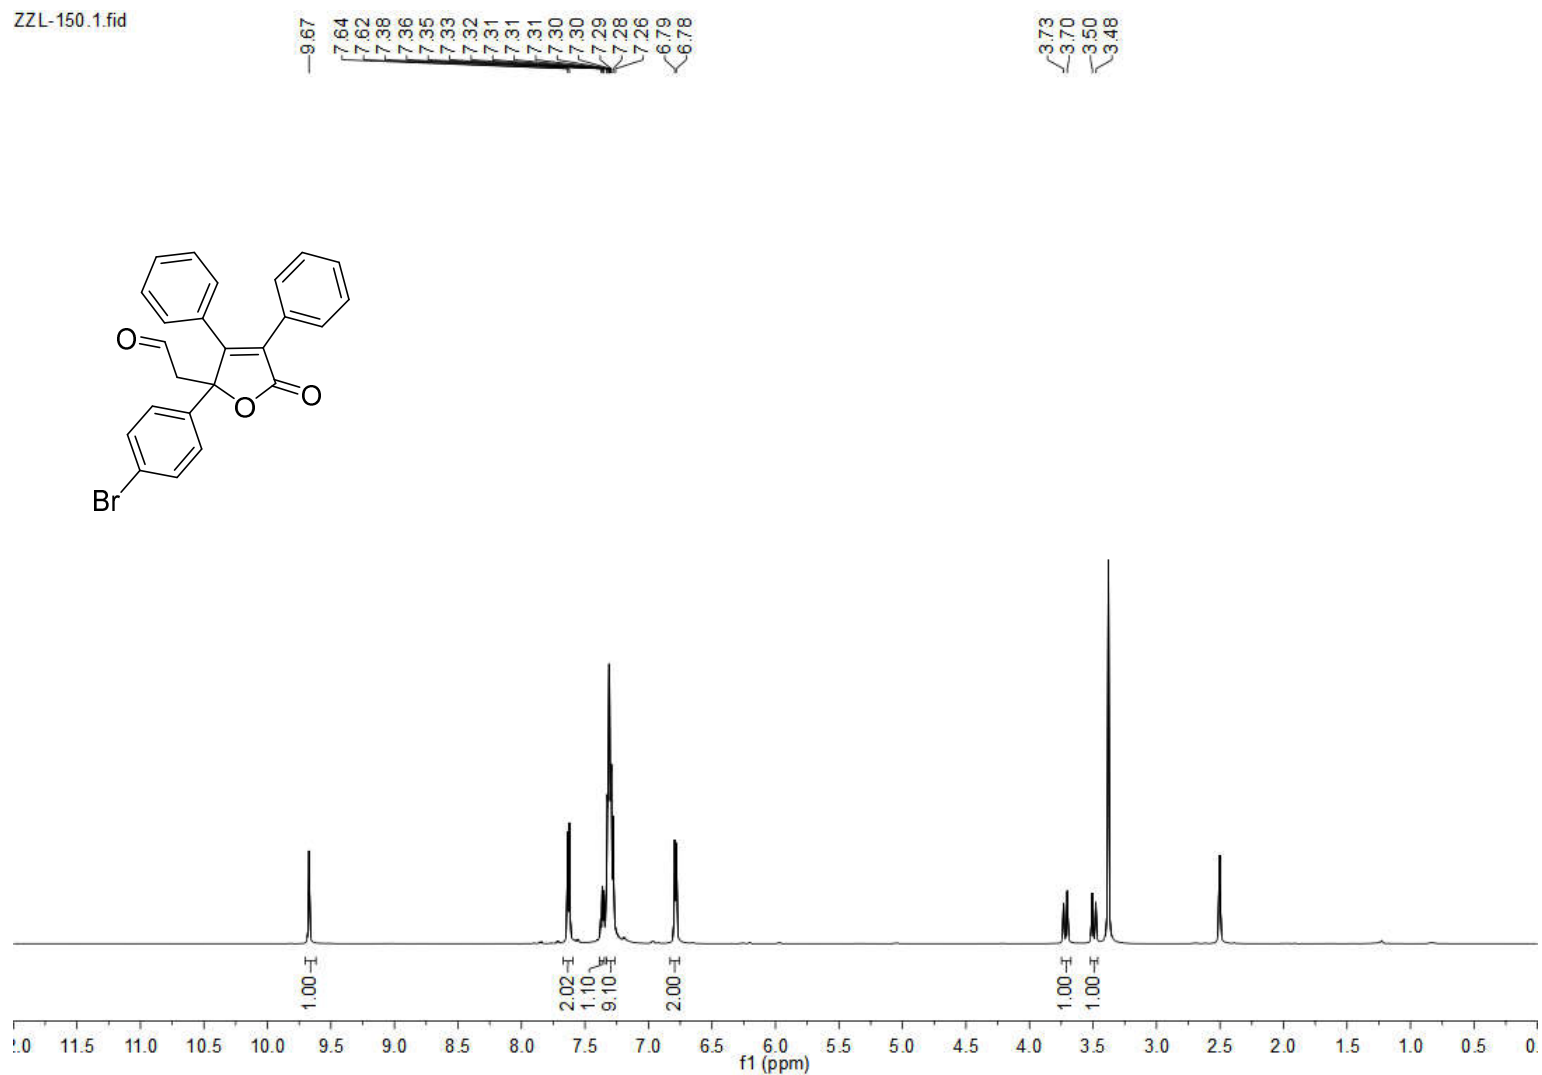

Figure S17. <sup>1</sup>H NMR (600 MHz, DMSO-*d*<sub>6</sub>) spectra of compound 3g

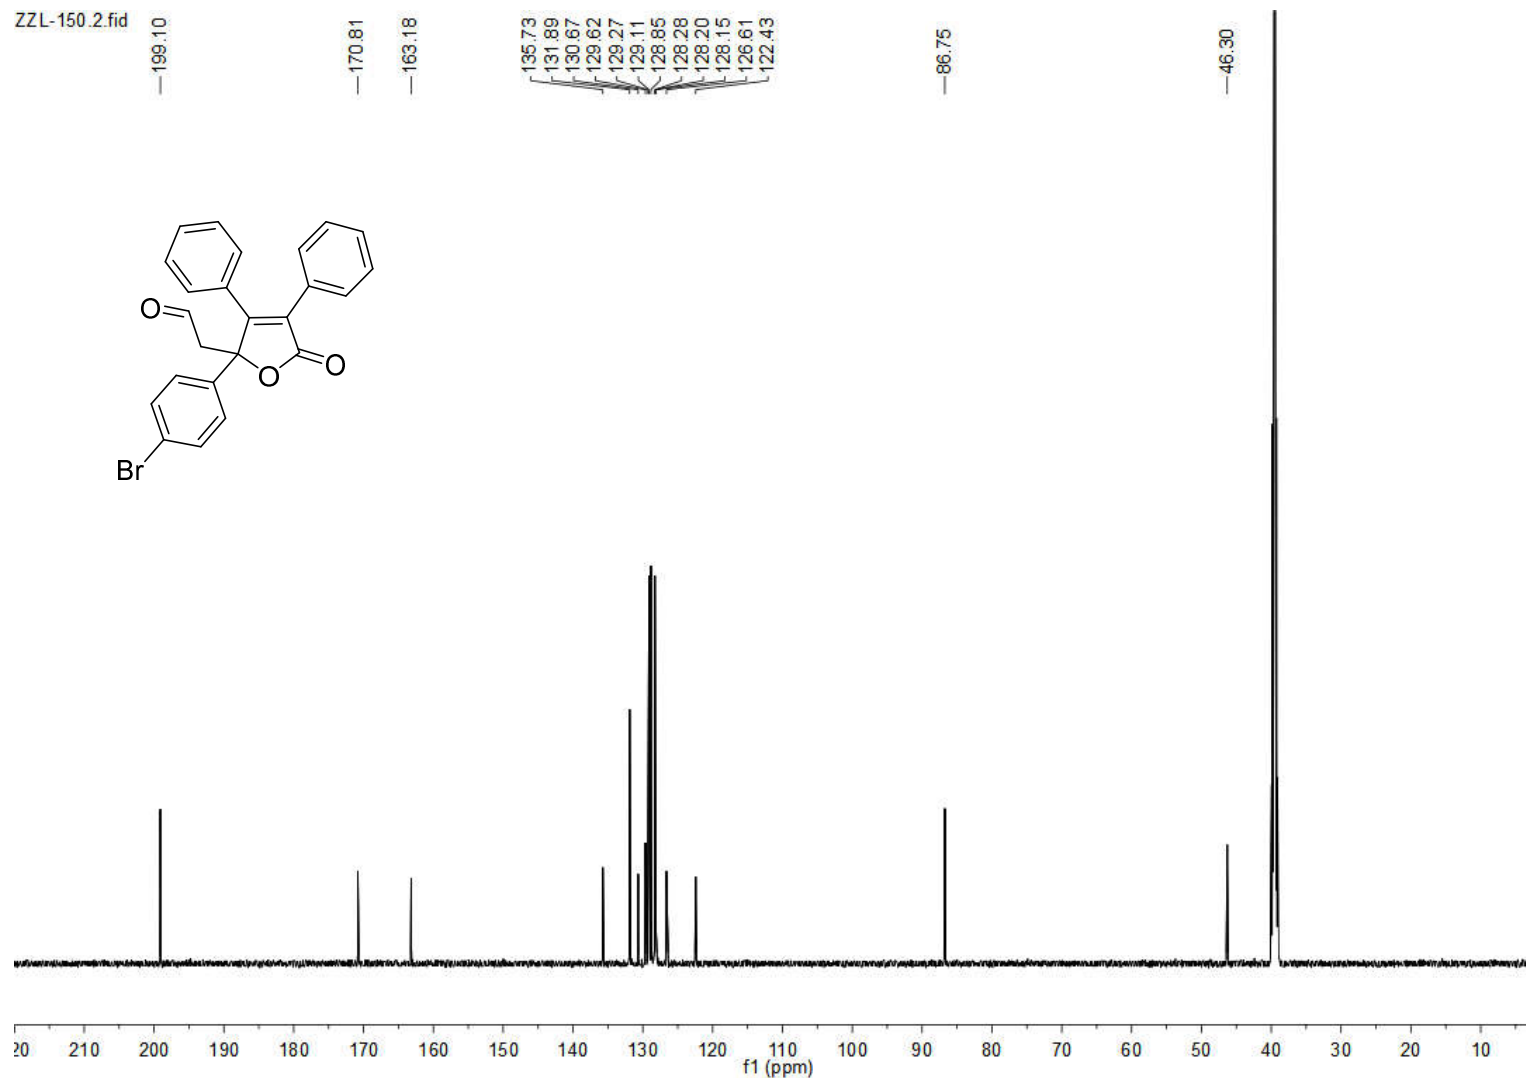

**Figure S18.**  $^{13}\text{C}$  NMR (150 MHz,  $\text{DMSO-}d_6$ ) spectra of compound **3g**

ZZL-158.1.fid

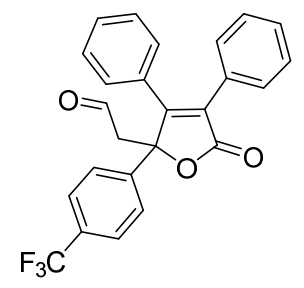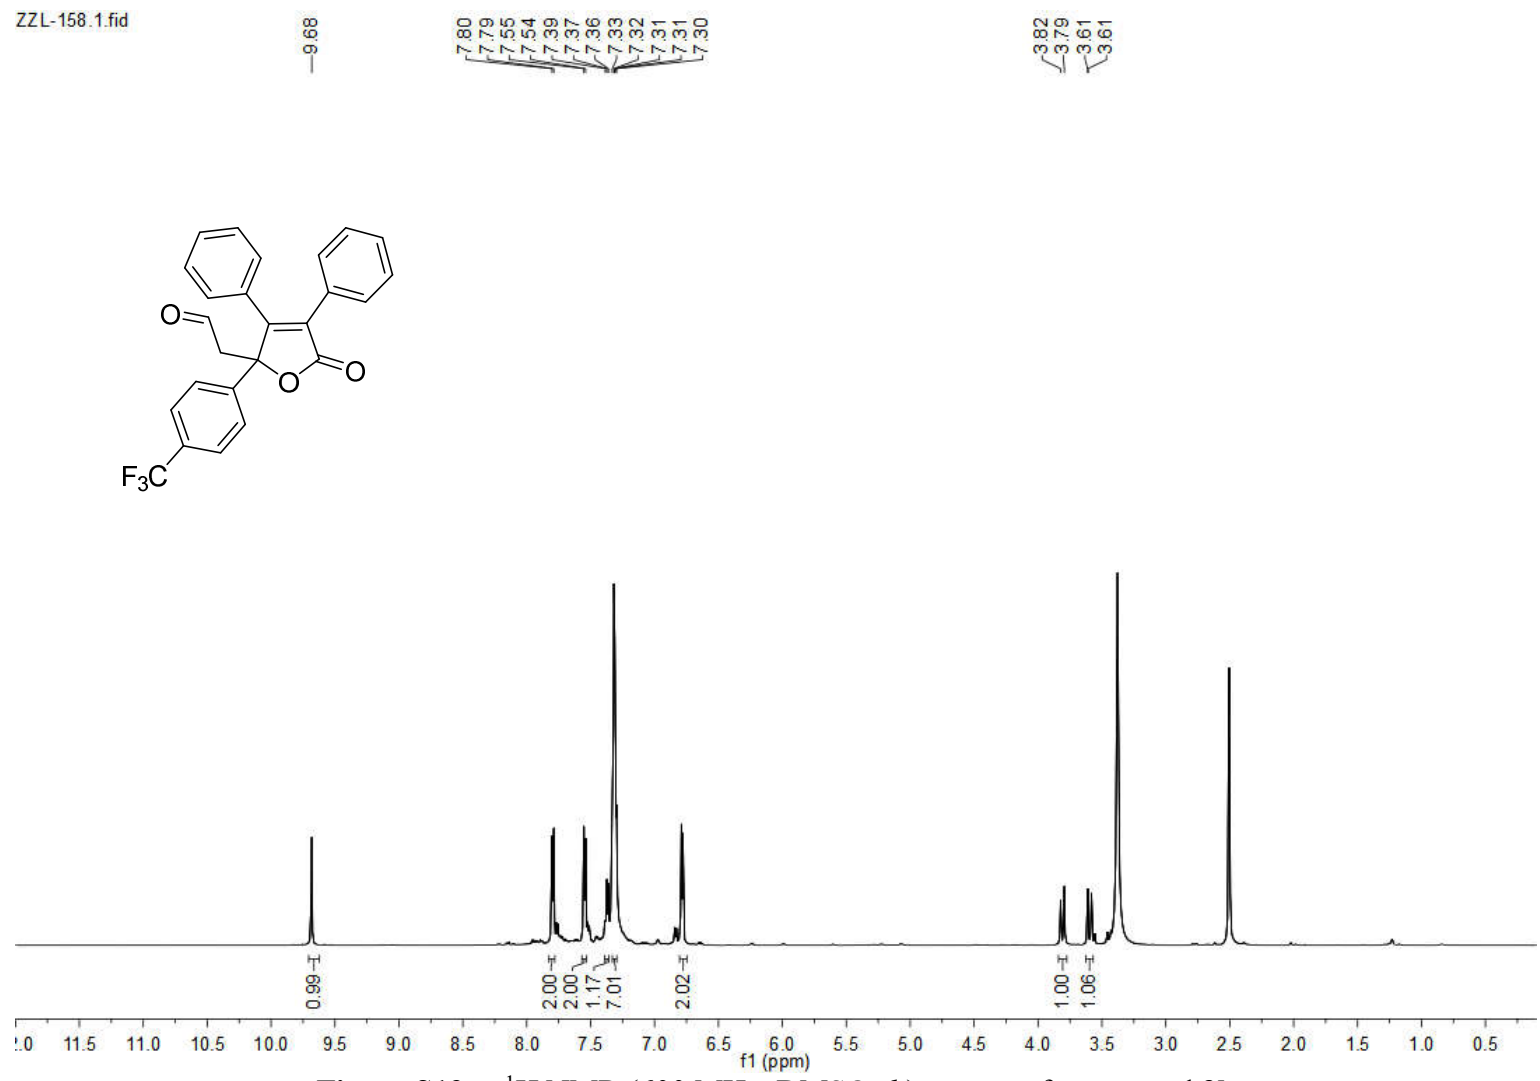

Figure S19. <sup>1</sup>H NMR (600 MHz, DMSO-*d*<sub>6</sub>) spectra of compound 3h



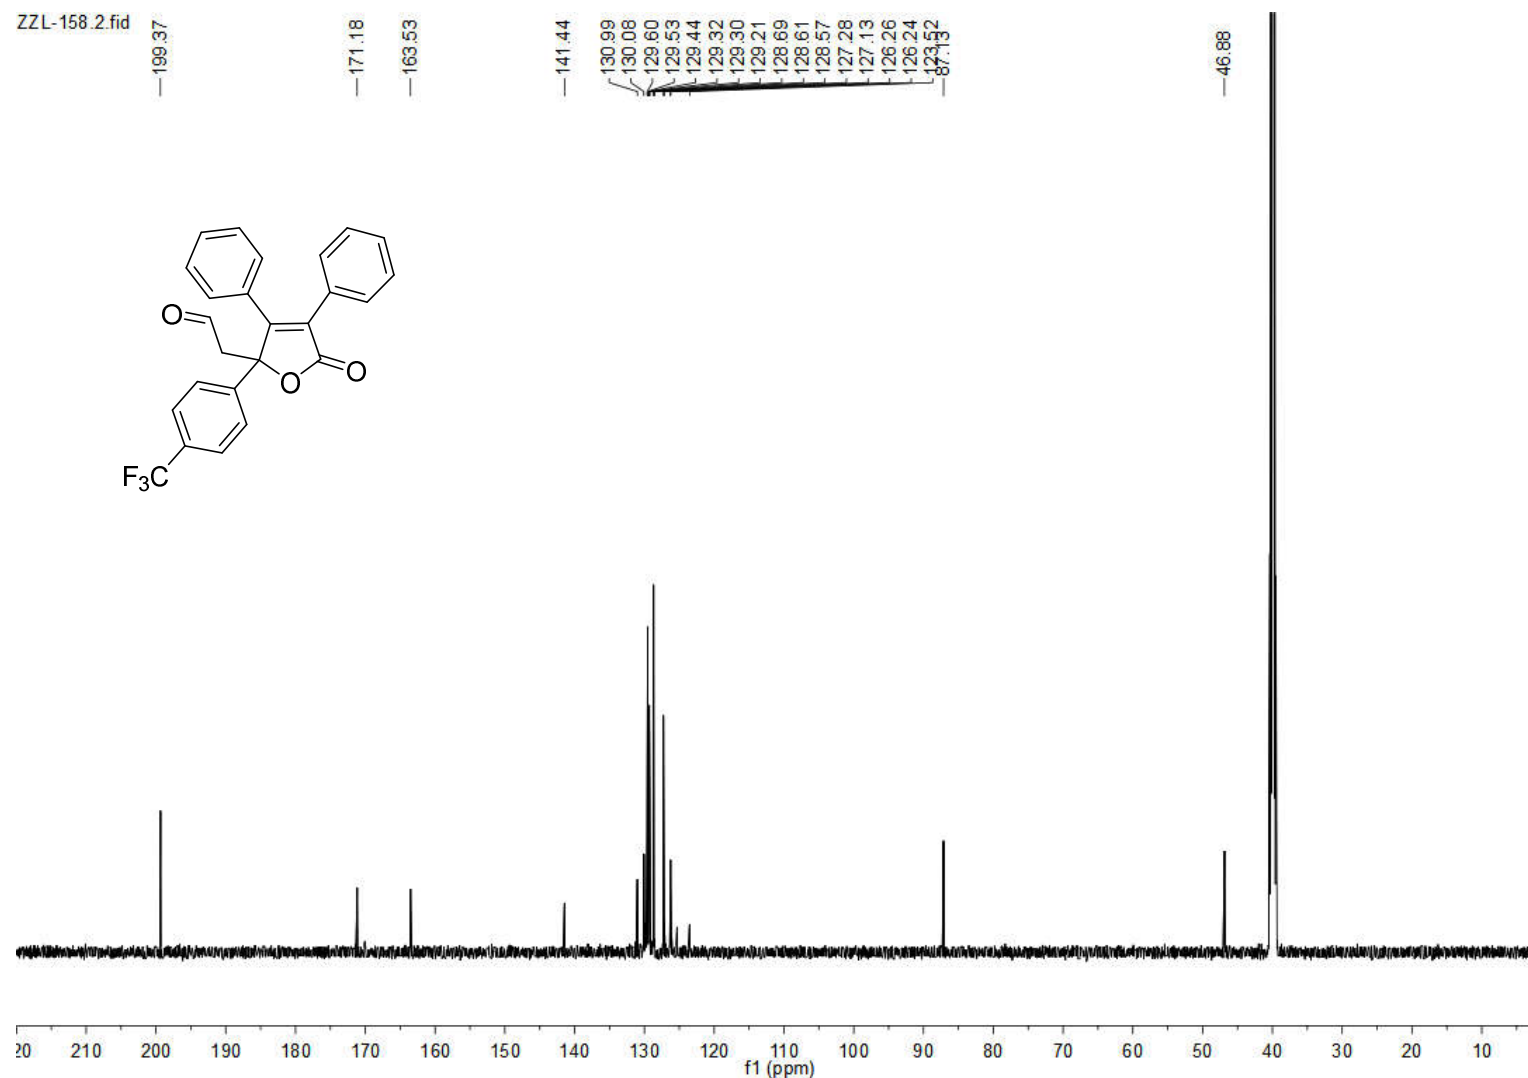

Figure S20.  $^{13}\text{C}$  NMR (150 MHz,  $\text{DMSO}-d_6$ ) spectra of compound **3h**

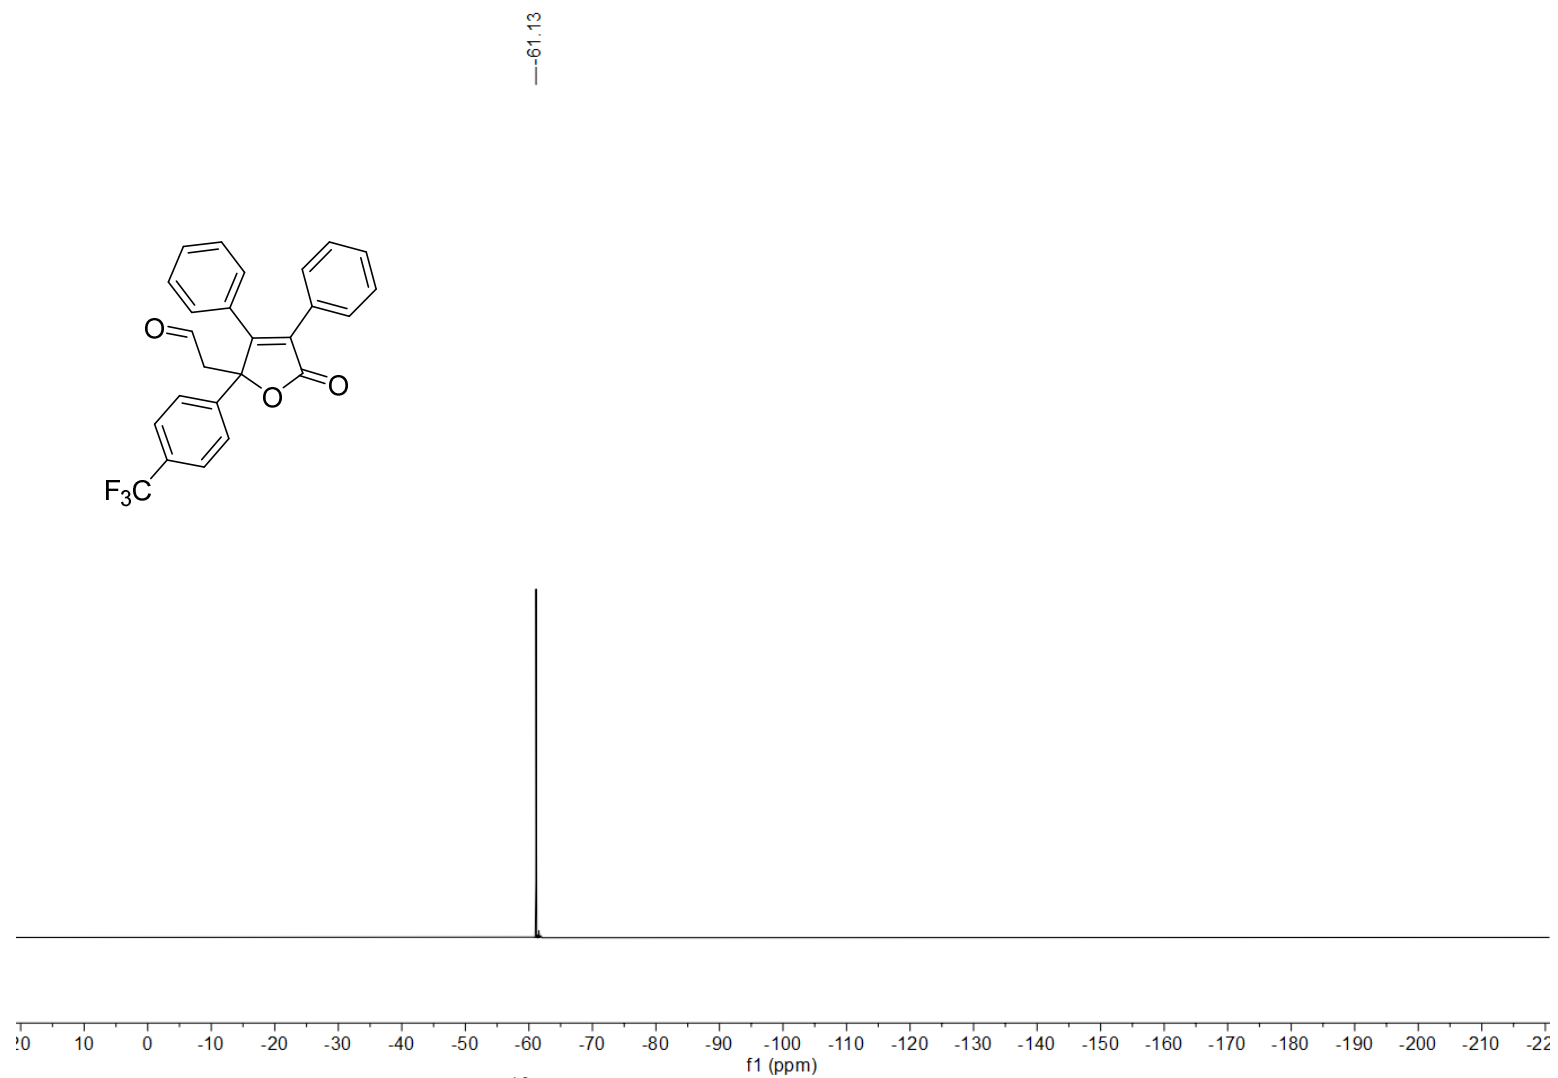

**Figure S21.**  $^{19}\text{F}$  NMR (470 MHz,  $\text{DMSO}-d_6$ ) spectra of compound **3h**

ZZL-166.1.fid

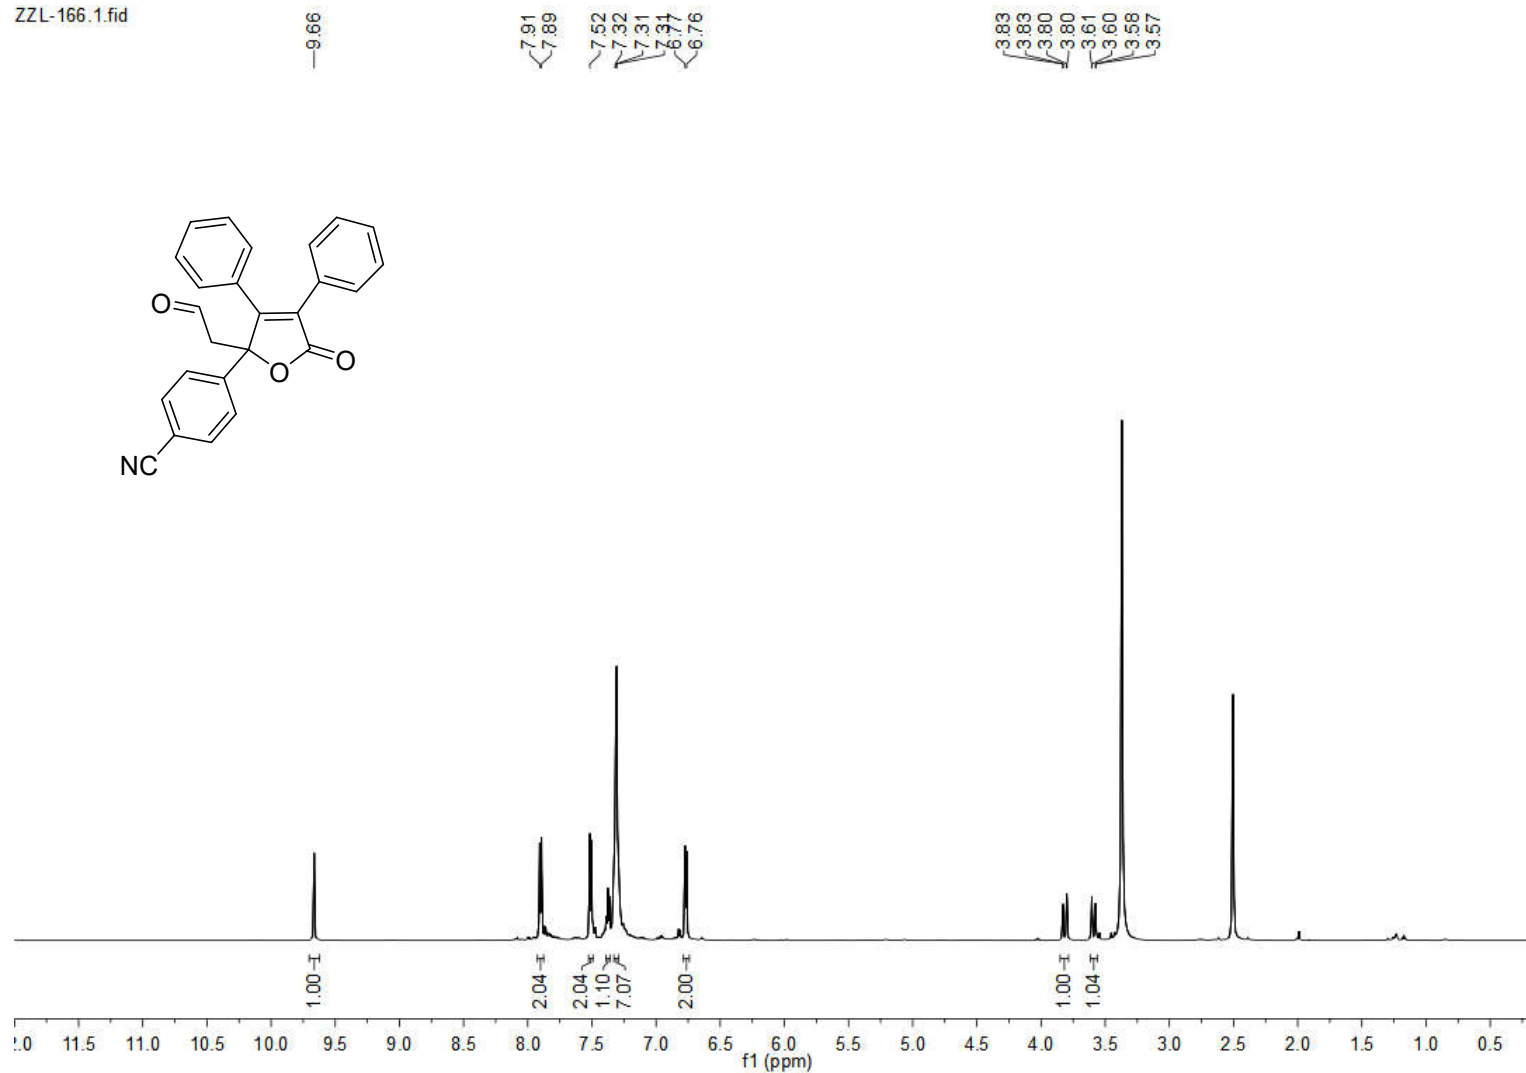

**Figure S22.** <sup>1</sup>H NMR (600 MHz, DMSO-*d*<sub>6</sub>) spectra of compound 3i

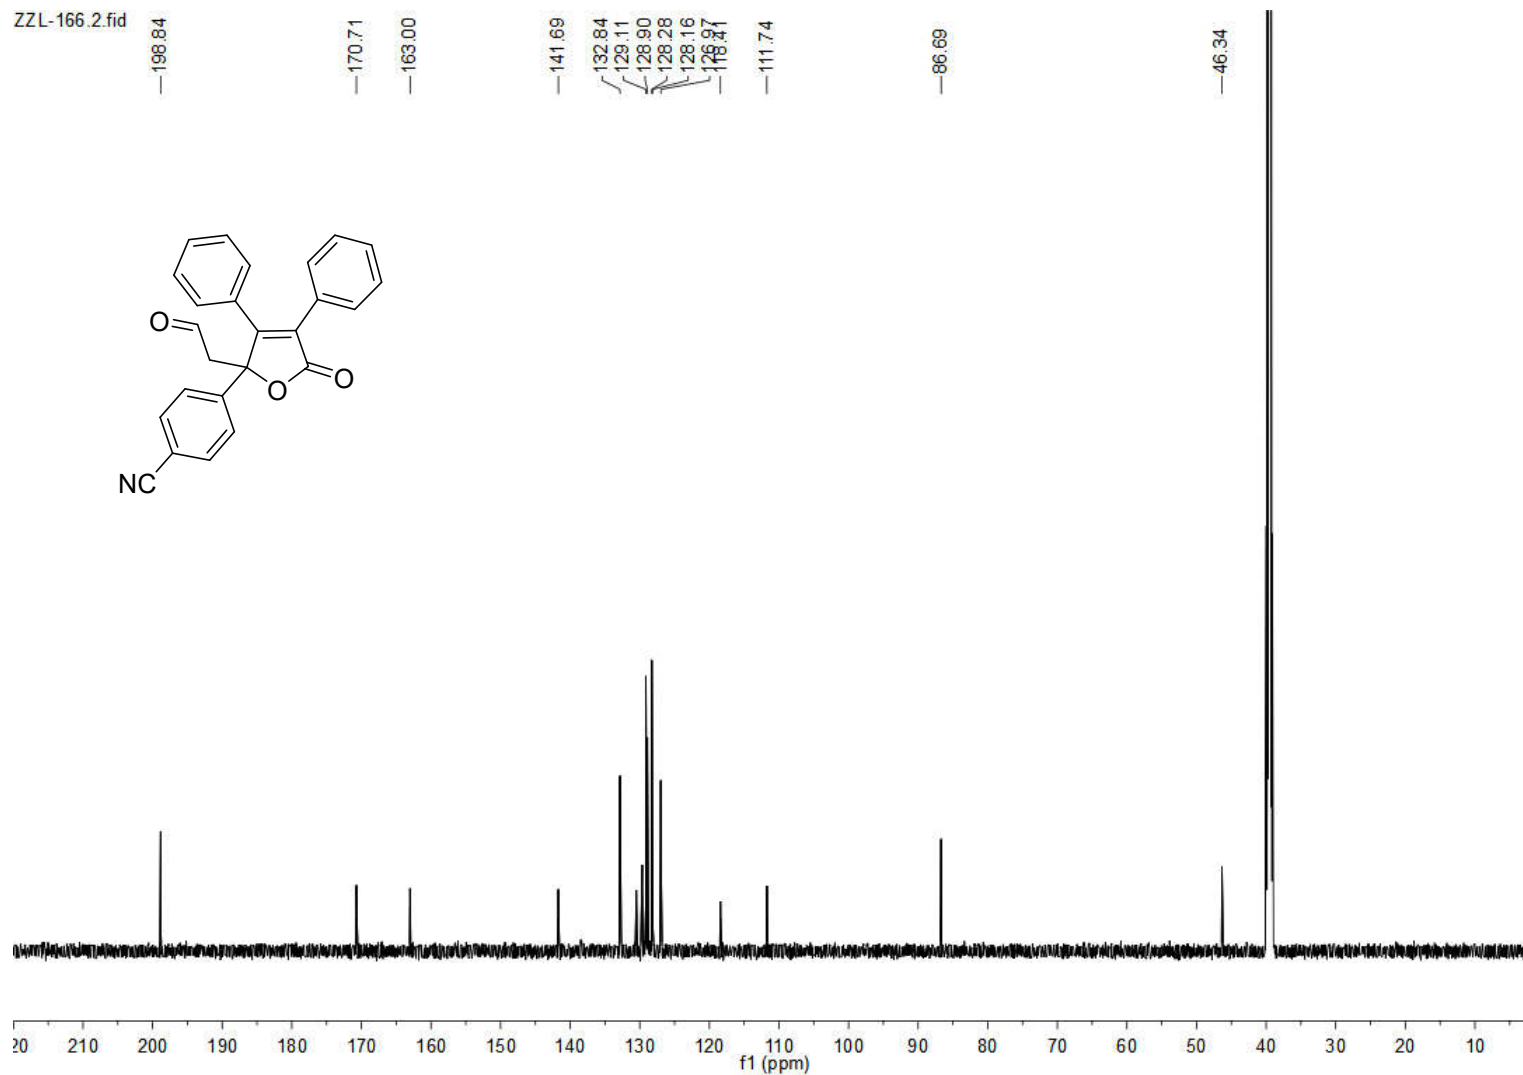

Figure S23.  $^{13}\text{C}$  NMR (150 MHz,  $\text{DMSO-}d_6$ ) spectra of compound **3i**

ZZL-162.1.fid

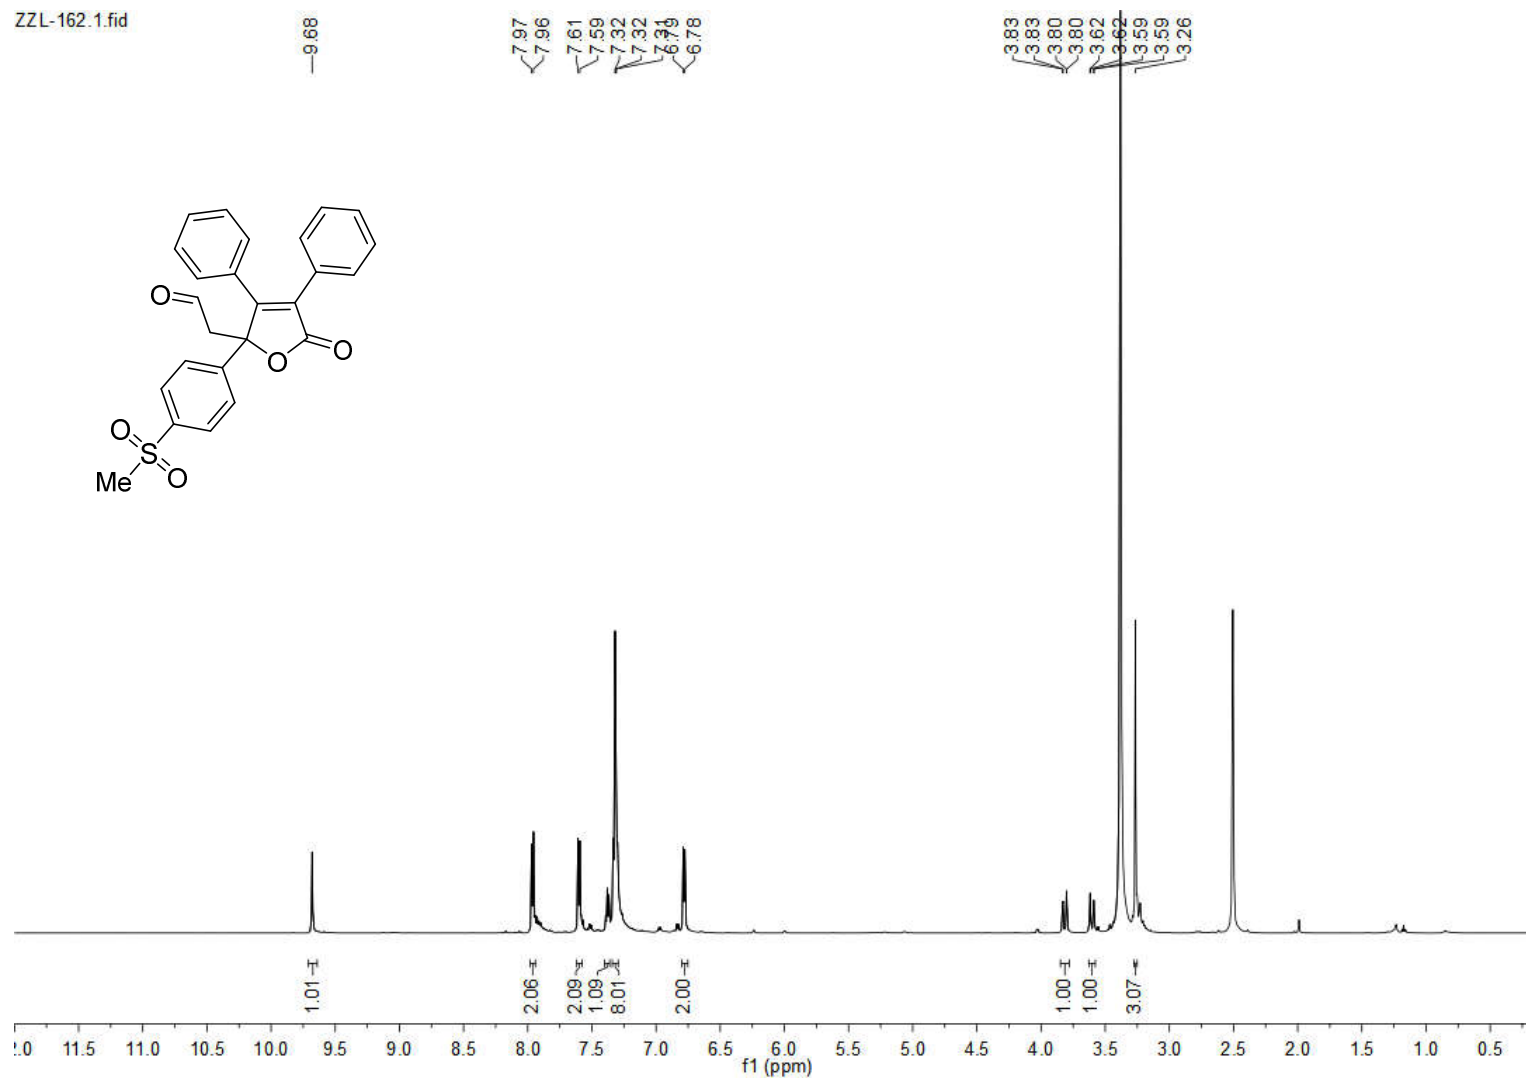

Figure S24. <sup>1</sup>H NMR (600 MHz, DMSO-*d*<sub>6</sub>) spectra of compound 3j

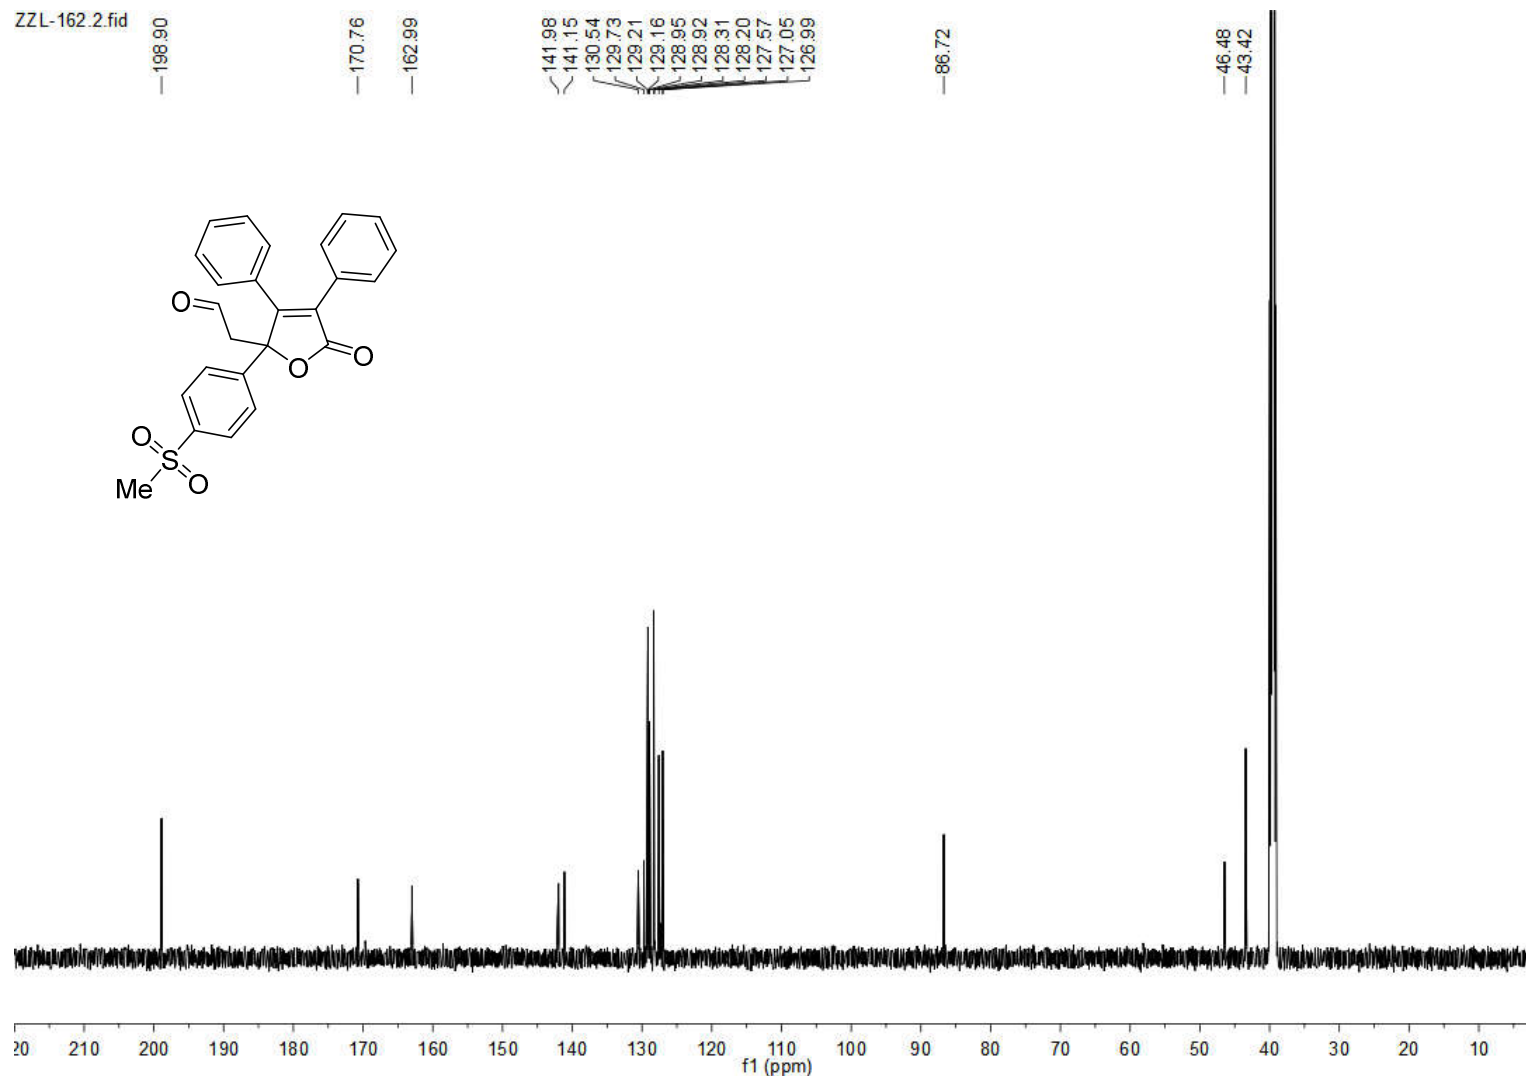

Figure S25.  $^{13}\text{C}$  NMR (150 MHz,  $\text{DMSO-}d_6$ ) spectra of compound 3j

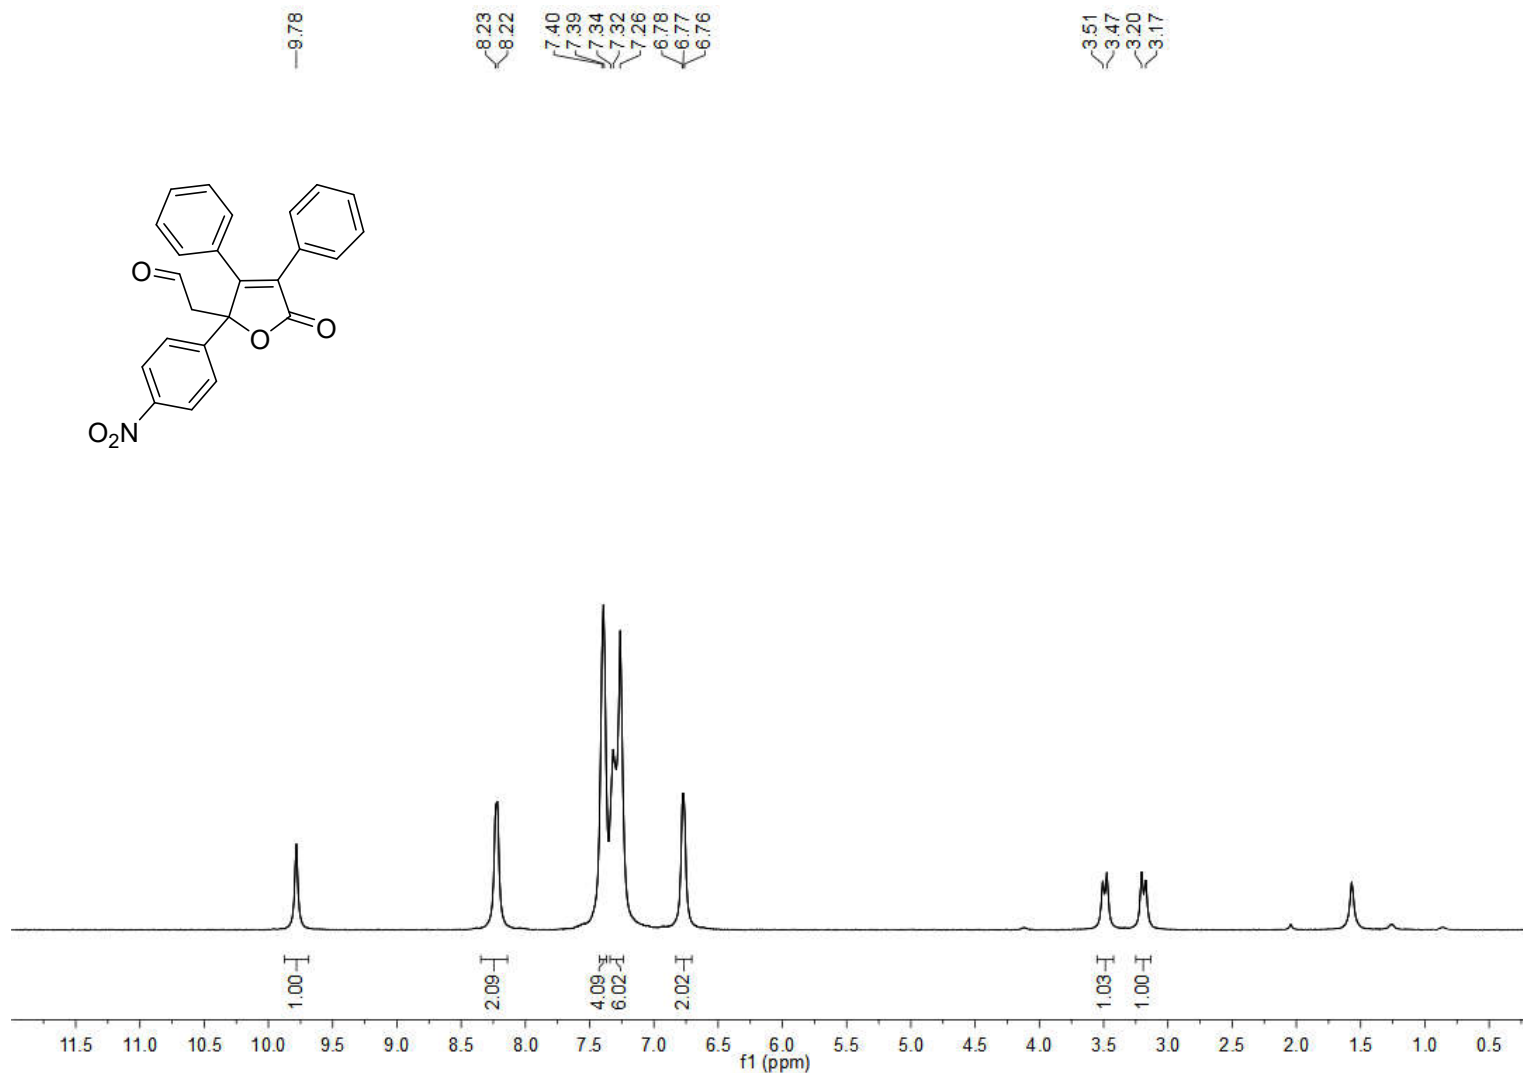

**Figure S26.** <sup>1</sup>H NMR (500 MHz, CDCl<sub>3</sub>) spectra of compound **3k**

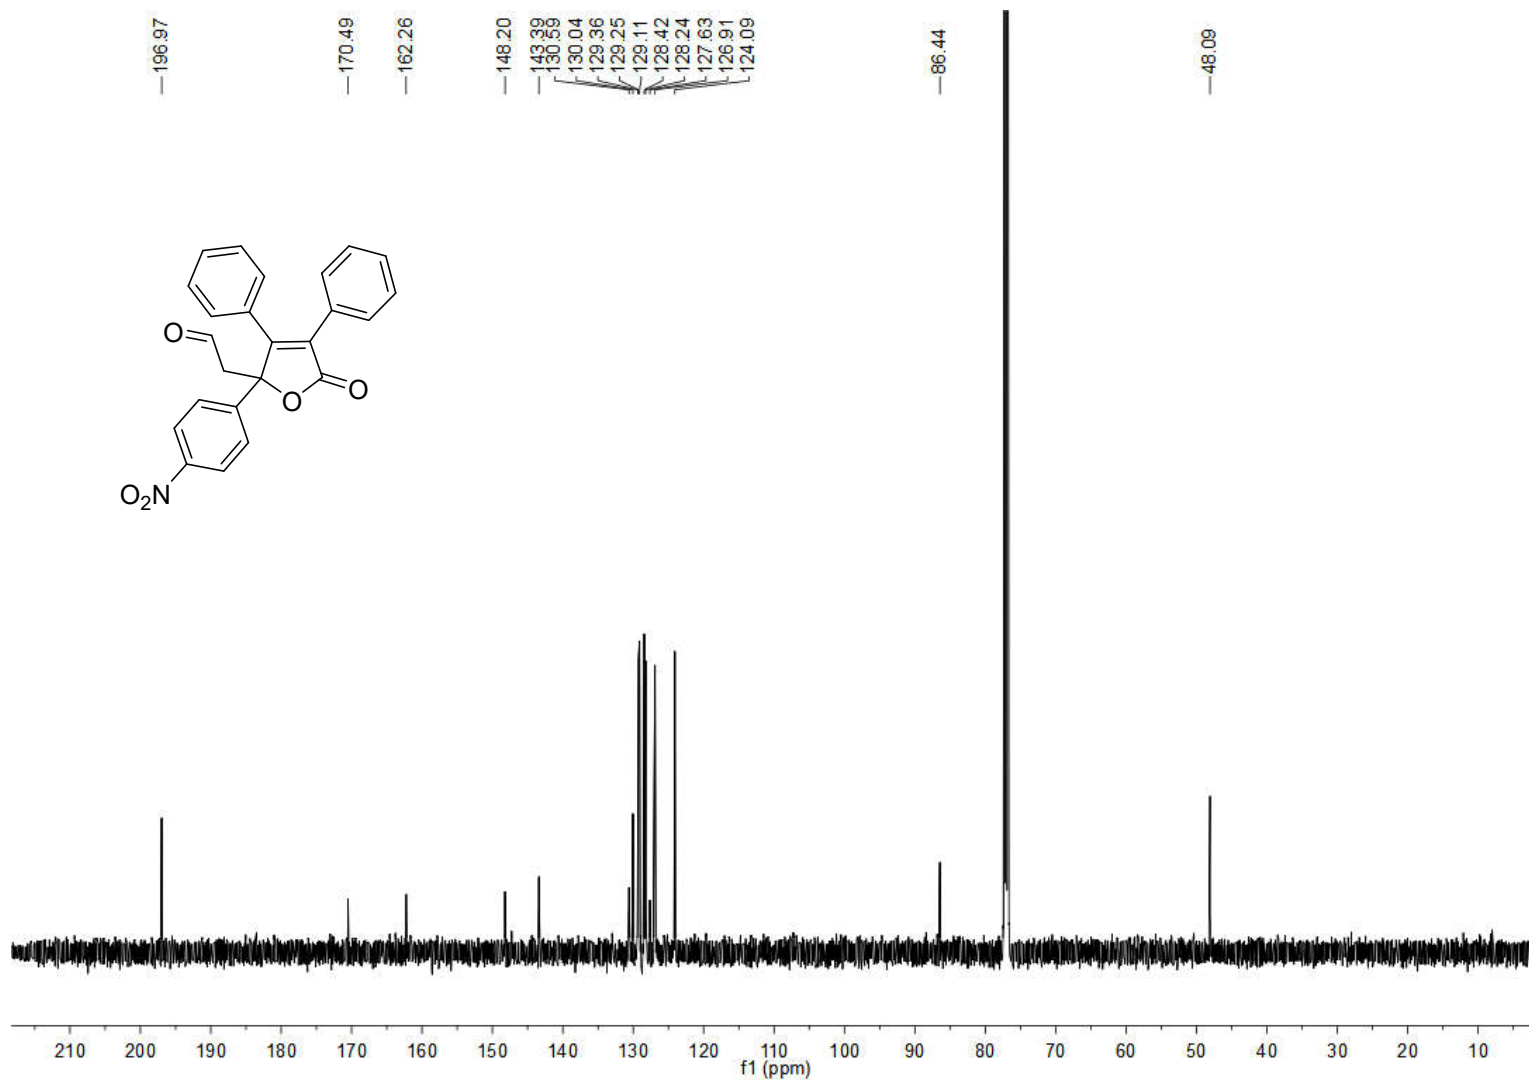

Figure S27. <sup>13</sup>C NMR (125 MHz, CDCl<sub>3</sub>) spectra of compound 3k



ZZL-168.1.fid

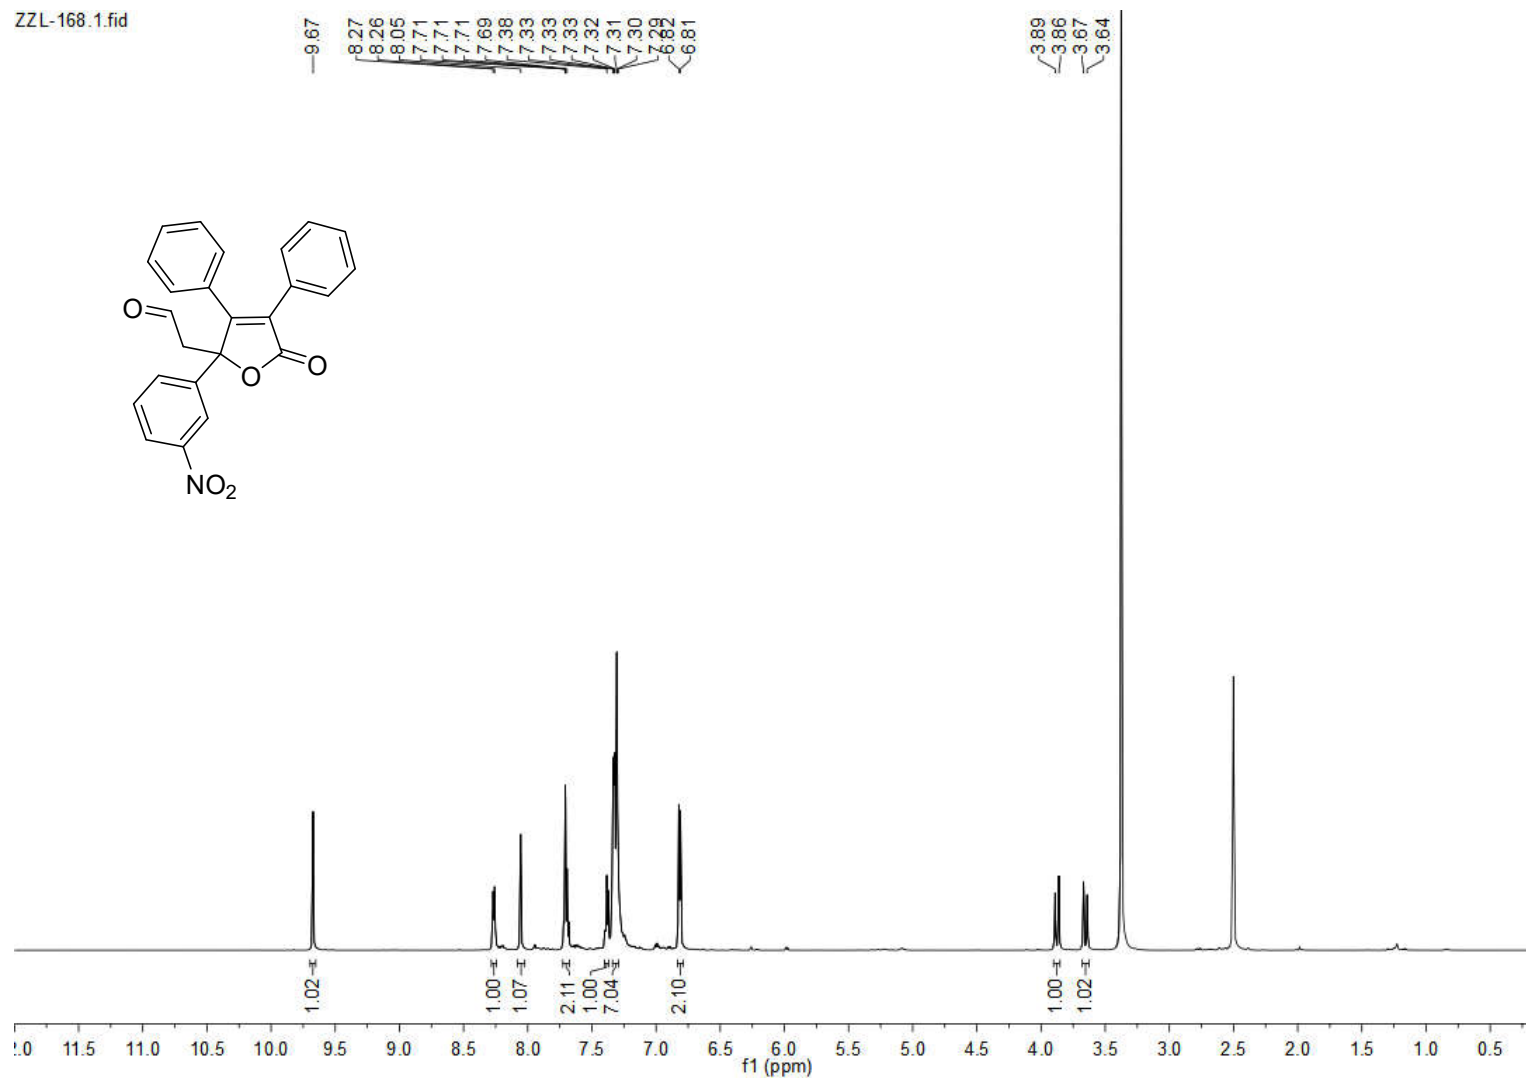

Figure S28.  $^1\text{H}$  NMR (600 MHz,  $\text{DMSO-}d_6$ ) spectra of compound 31

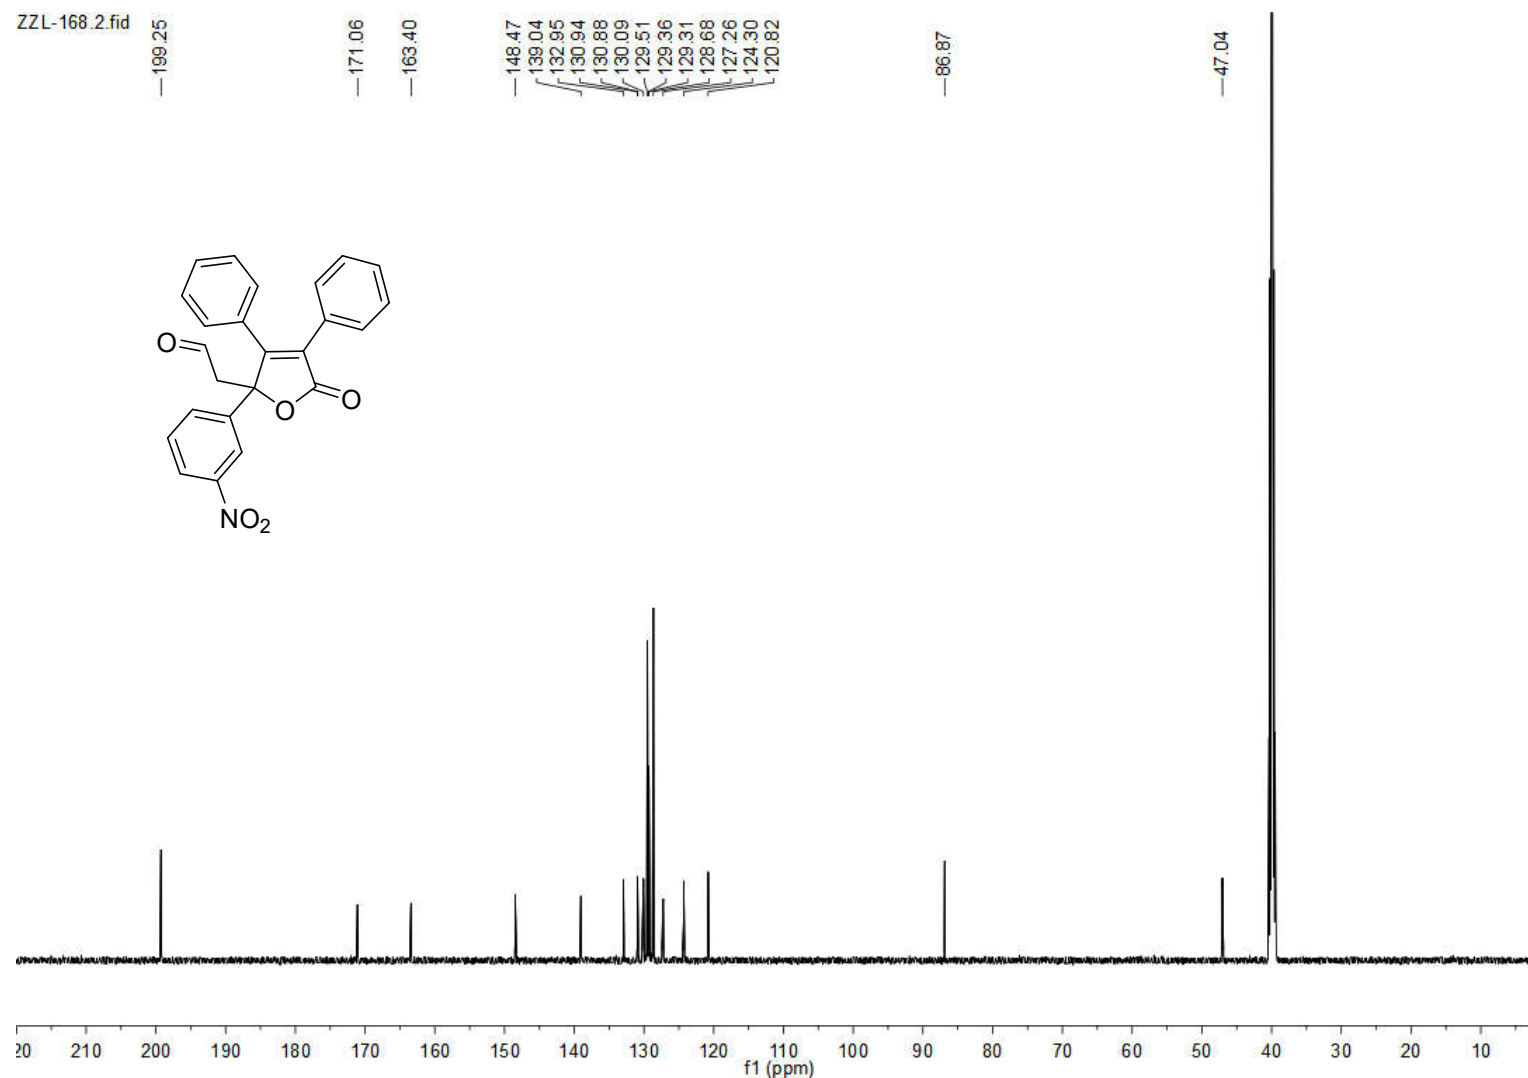

Figure S29. <sup>13</sup>C NMR (150 MHz, DMSO-*d*<sub>6</sub>) spectra of compound **31**

ZZL-155.1.fid

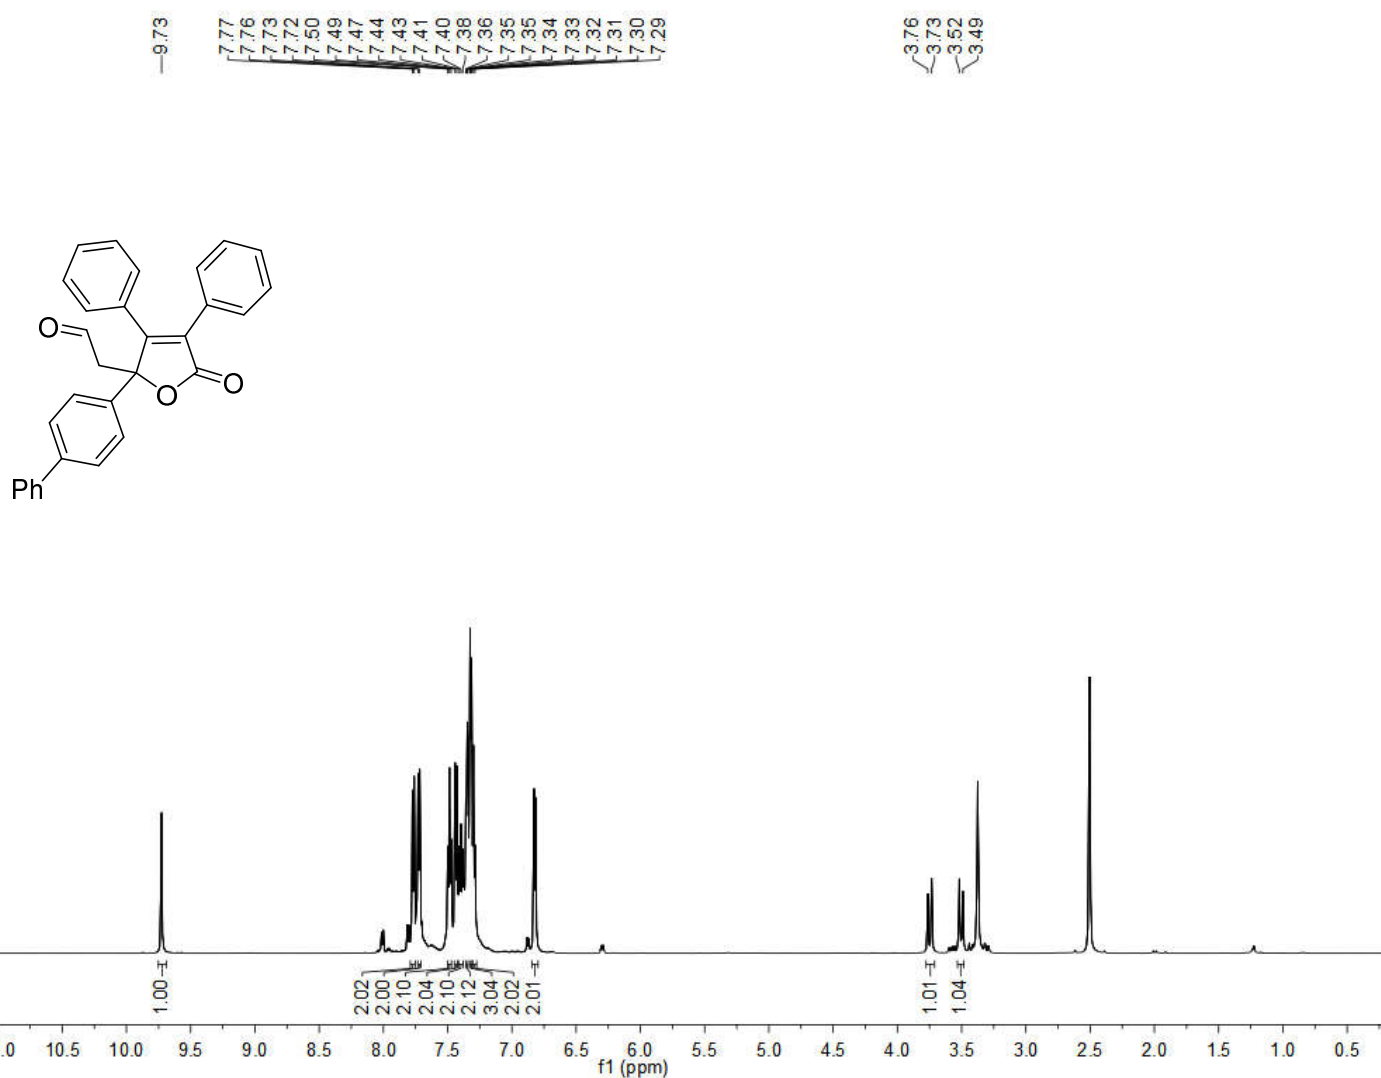

**Figure S30.** <sup>1</sup>H NMR (600 MHz, DMSO-*d*<sub>6</sub>) spectra of compound **3m**

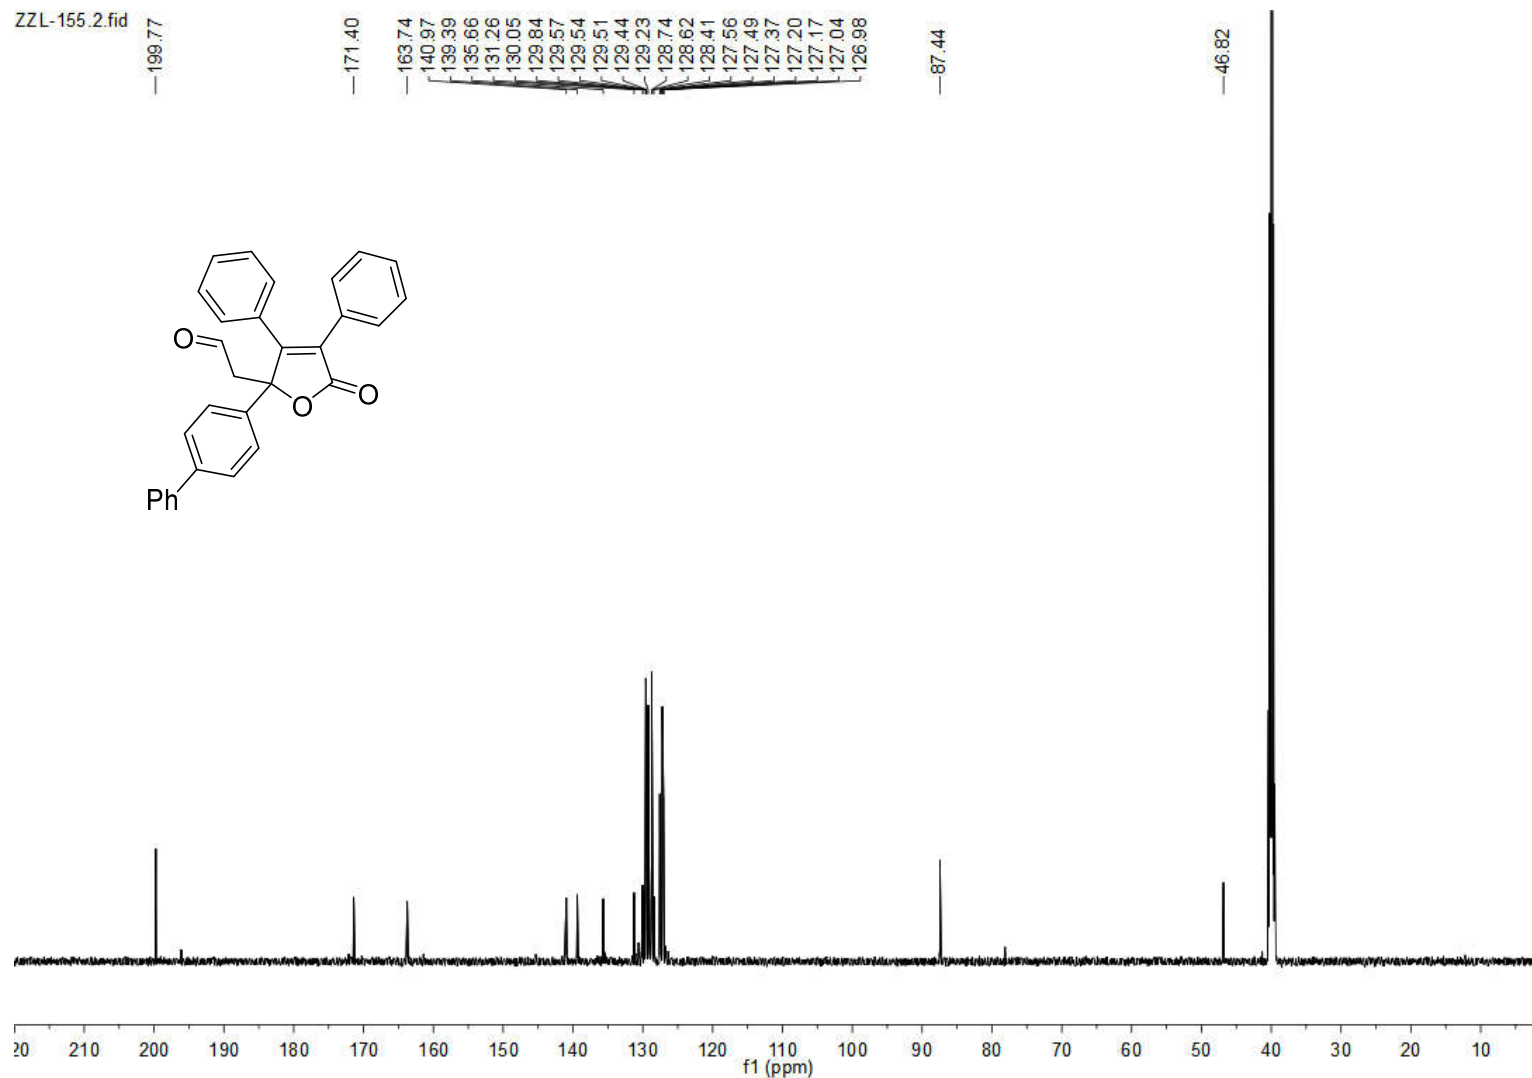

**Figure S31.**  $^{13}\text{C}$  NMR (150 MHz,  $\text{DMSO-}d_6$ ) spectra of compound **3m**

ZZL-159.1.fid

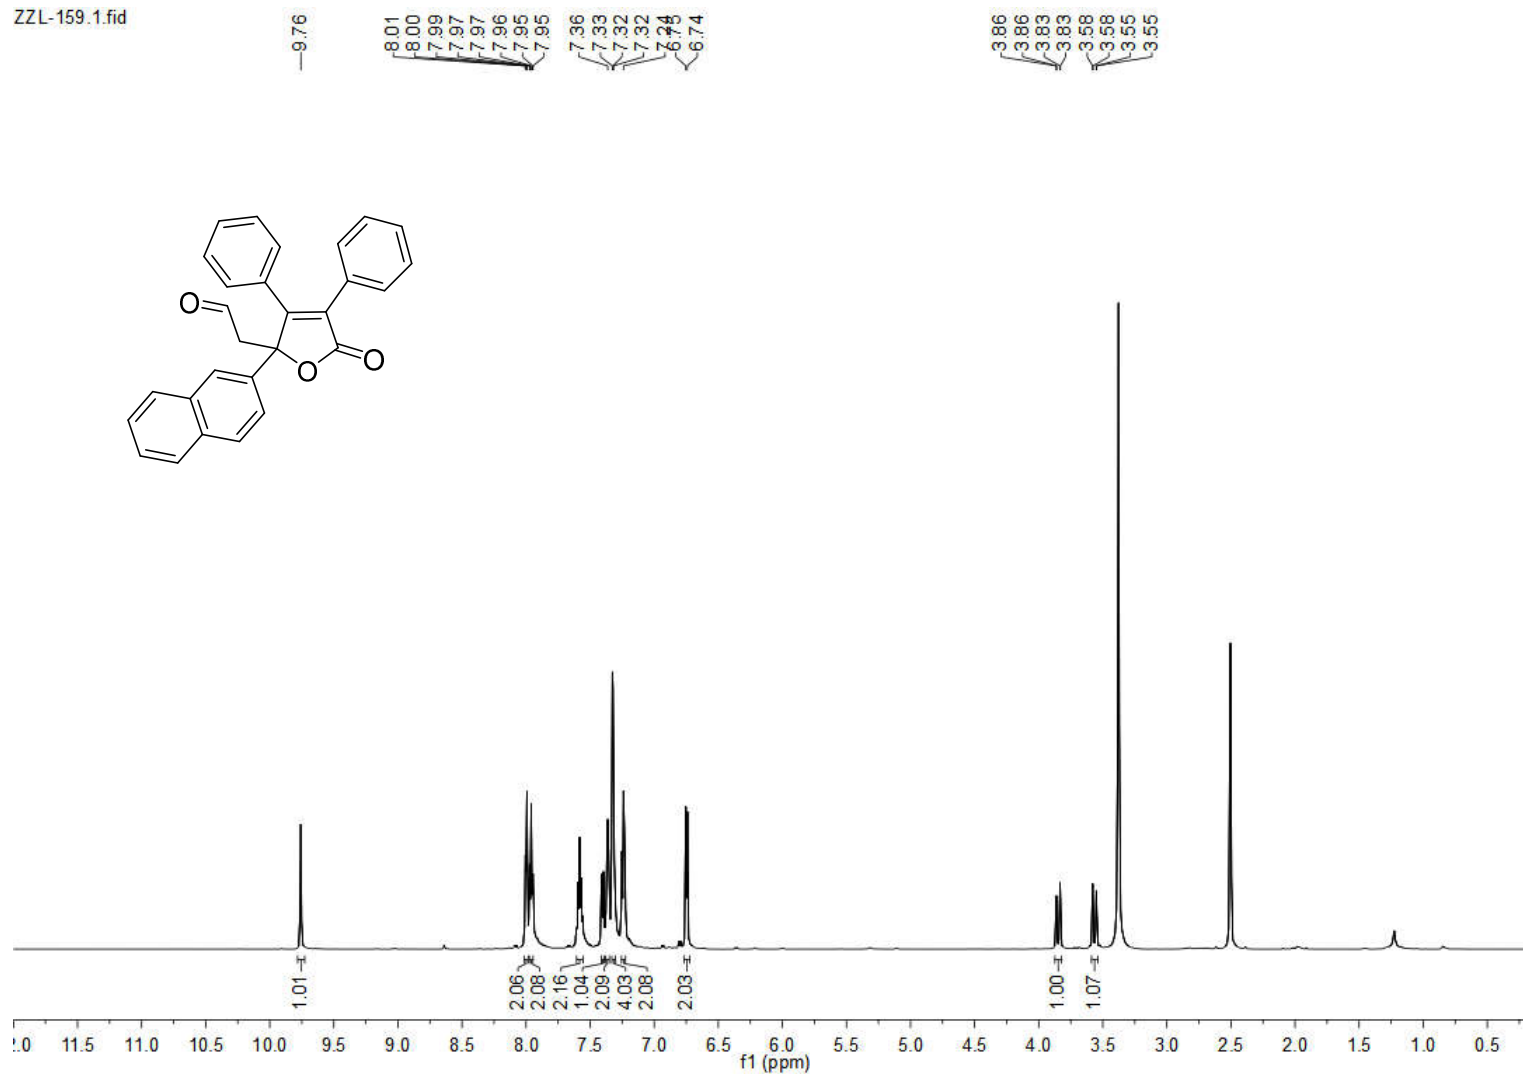

Figure S32. <sup>1</sup>H NMR (600 MHz, DMSO-*d*<sub>6</sub>) spectra of compound 3n

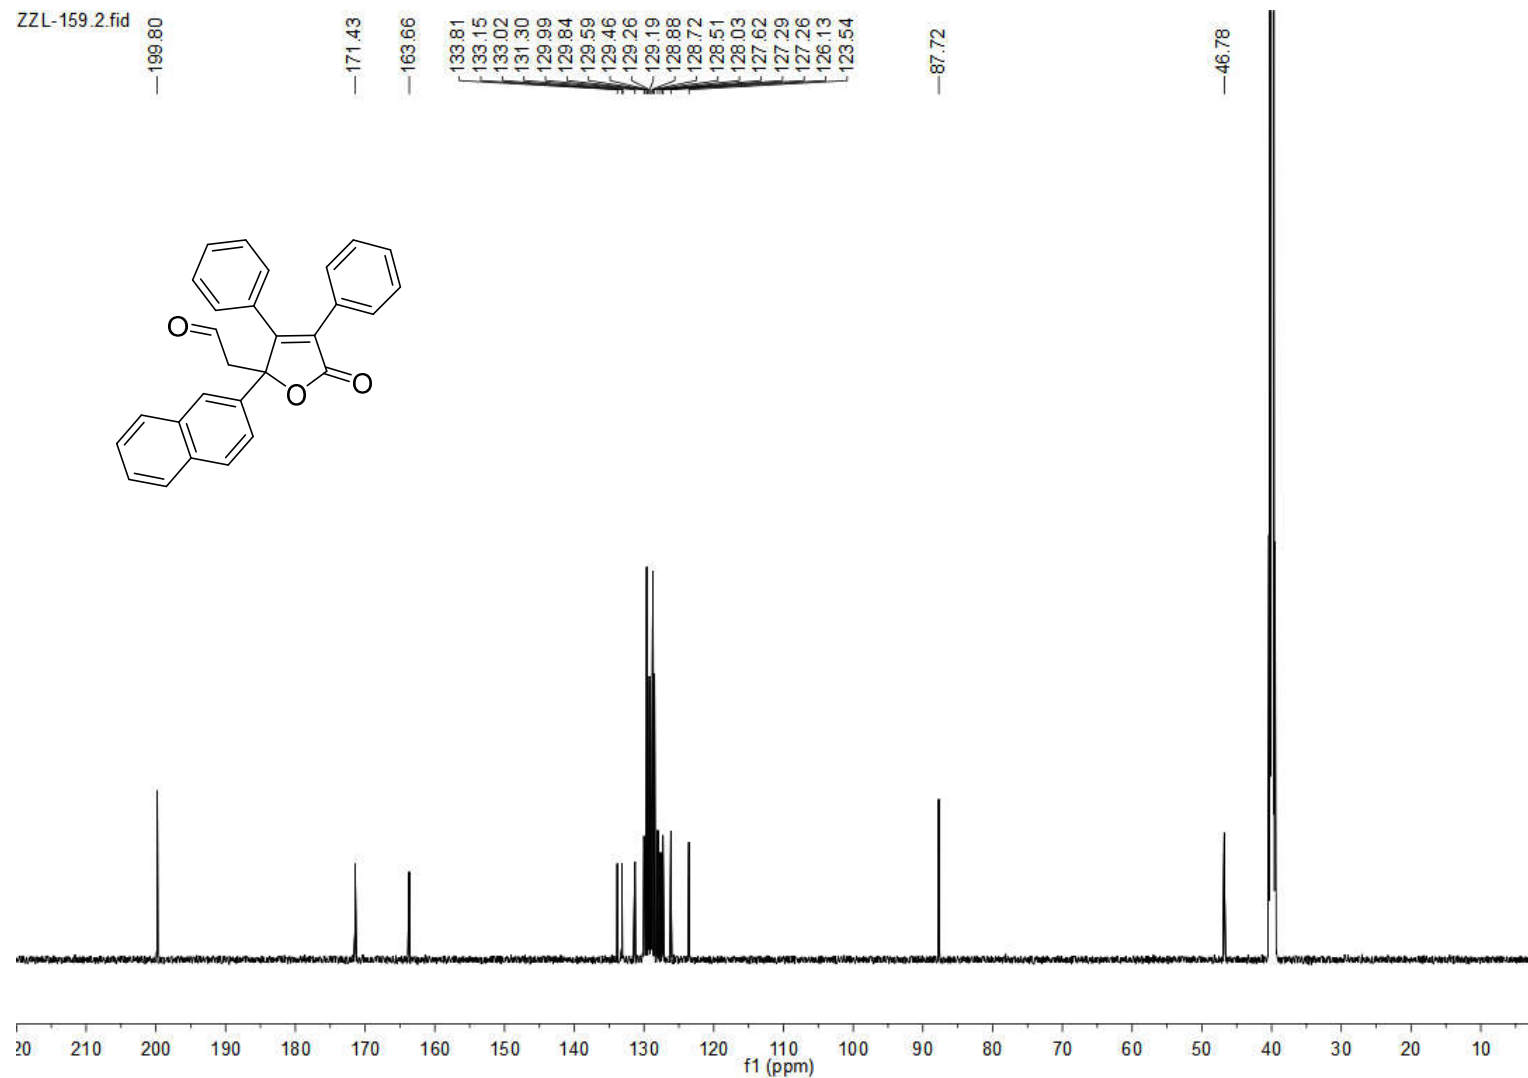

**Figure S33.**  $^{13}\text{C}$  NMR (150 MHz,  $\text{DMSO-}d_6$ ) spectra of compound **3n**

ZZL-156.1.fid

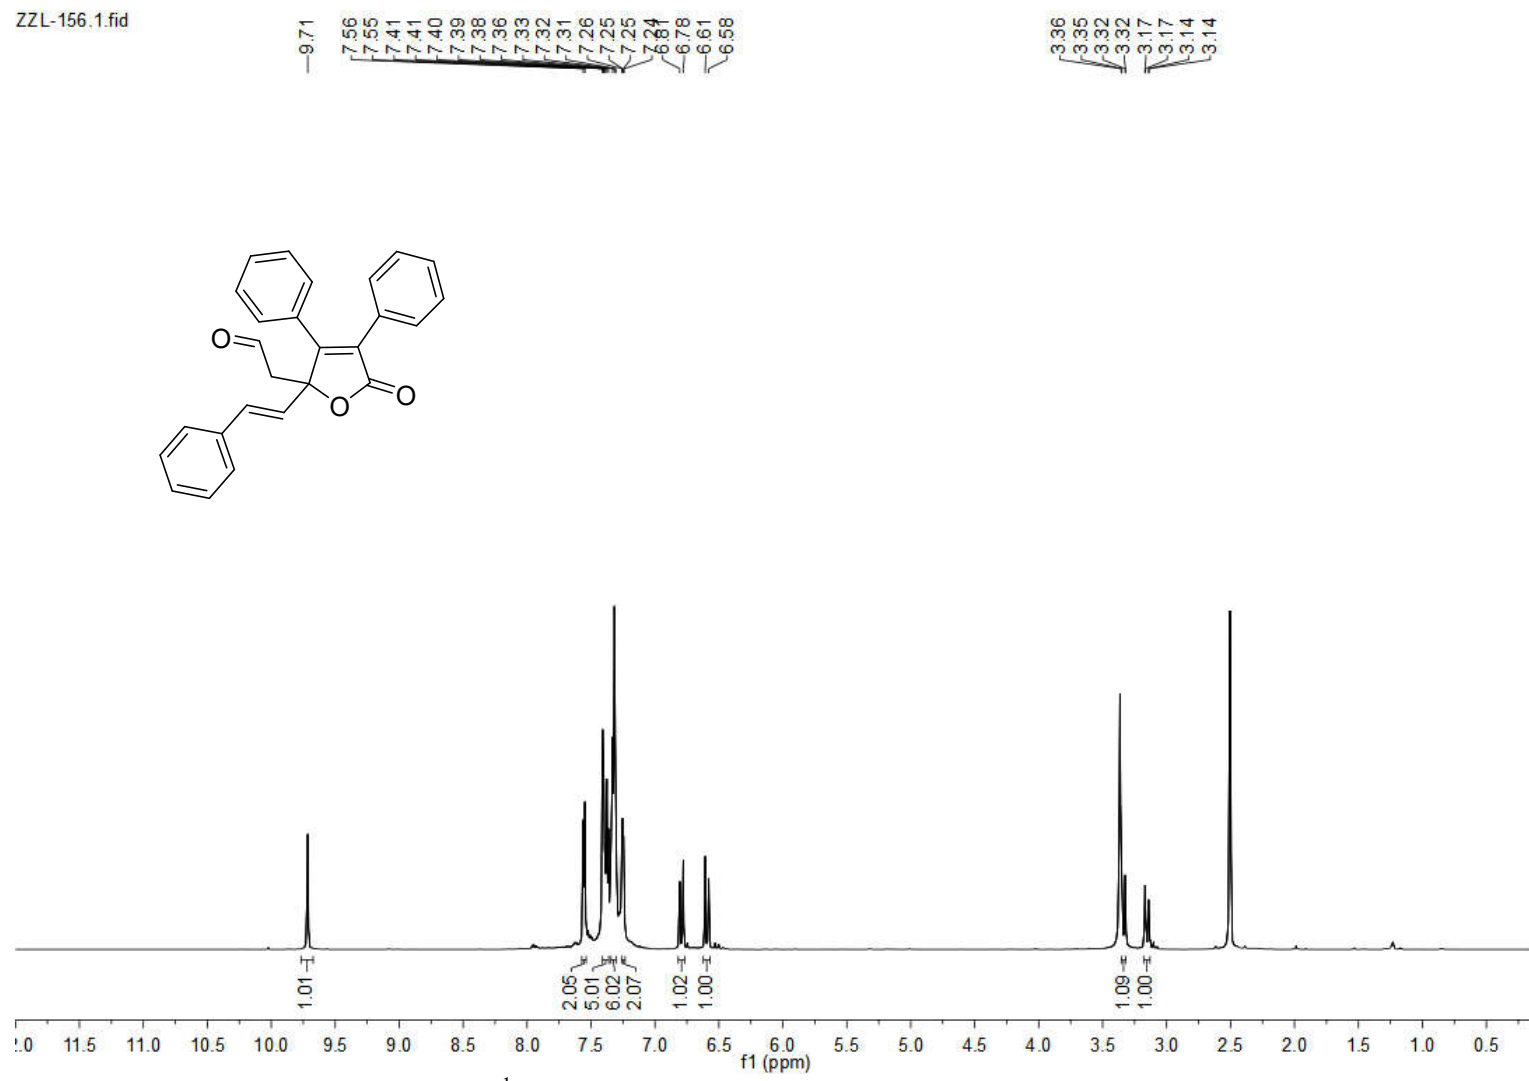

Figure S34 <sup>1</sup>H NMR (600 MHz, DMSO-*d*<sub>6</sub>) spectra of compound 30

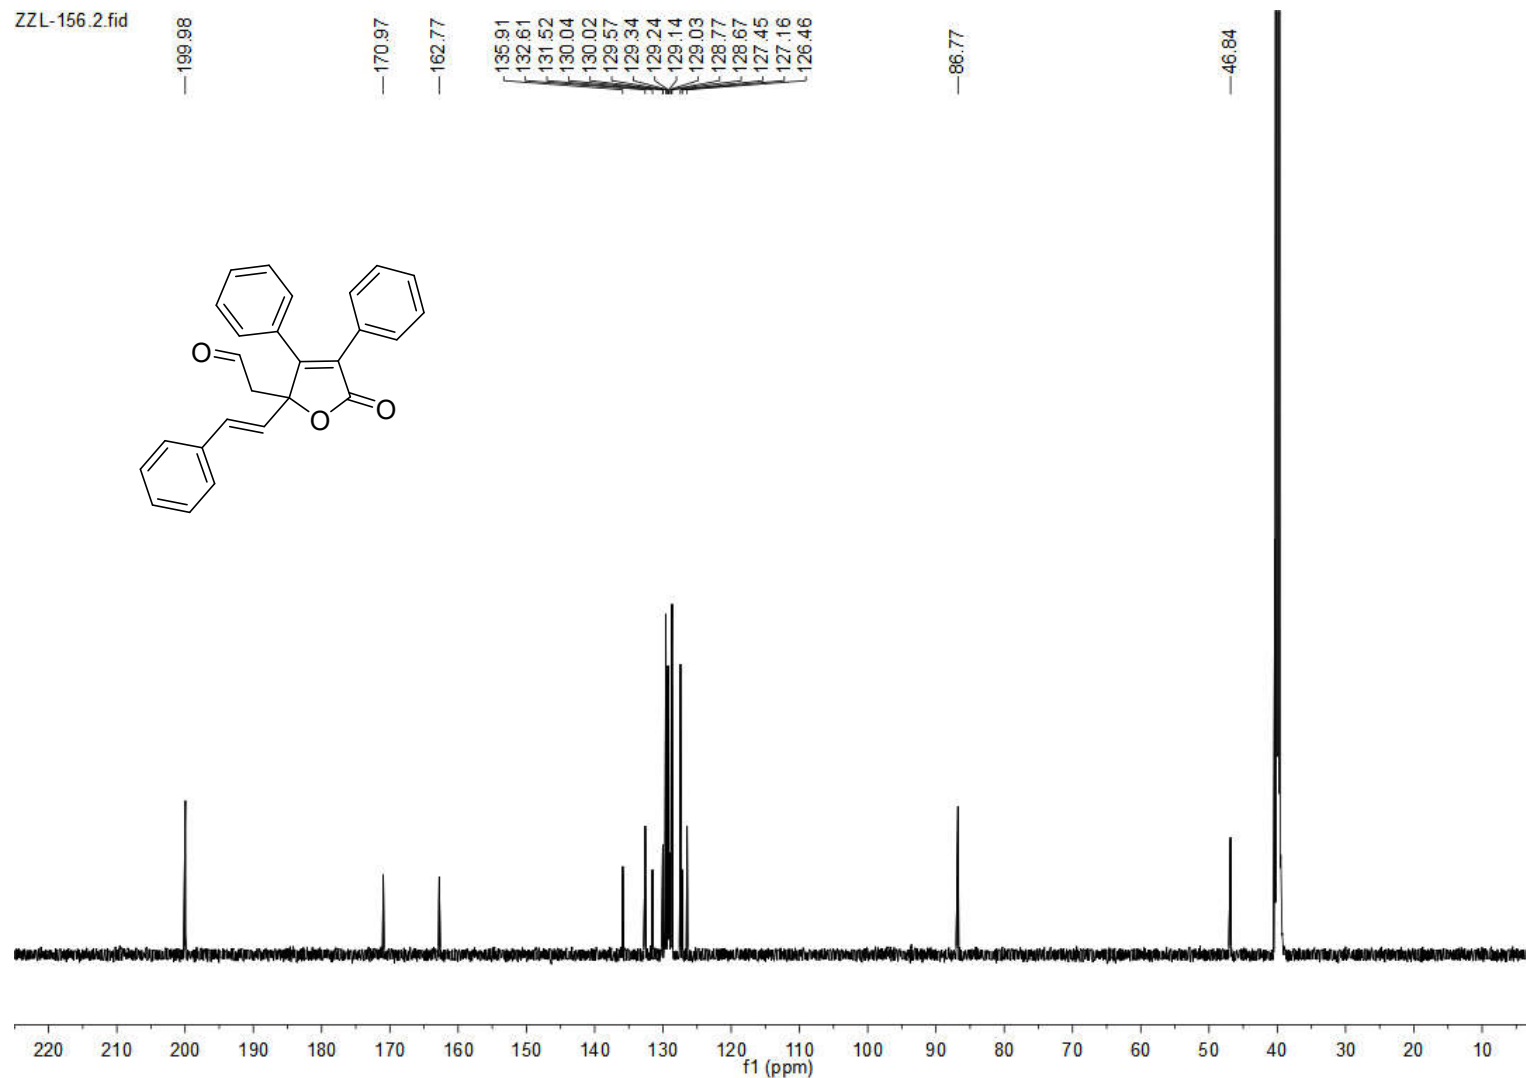

**Figure S35.**  $^{13}\text{C}$  NMR (150 MHz,  $\text{DMSO-}d_6$ ) spectra of compound **3o**



ZZL-157.1.fid

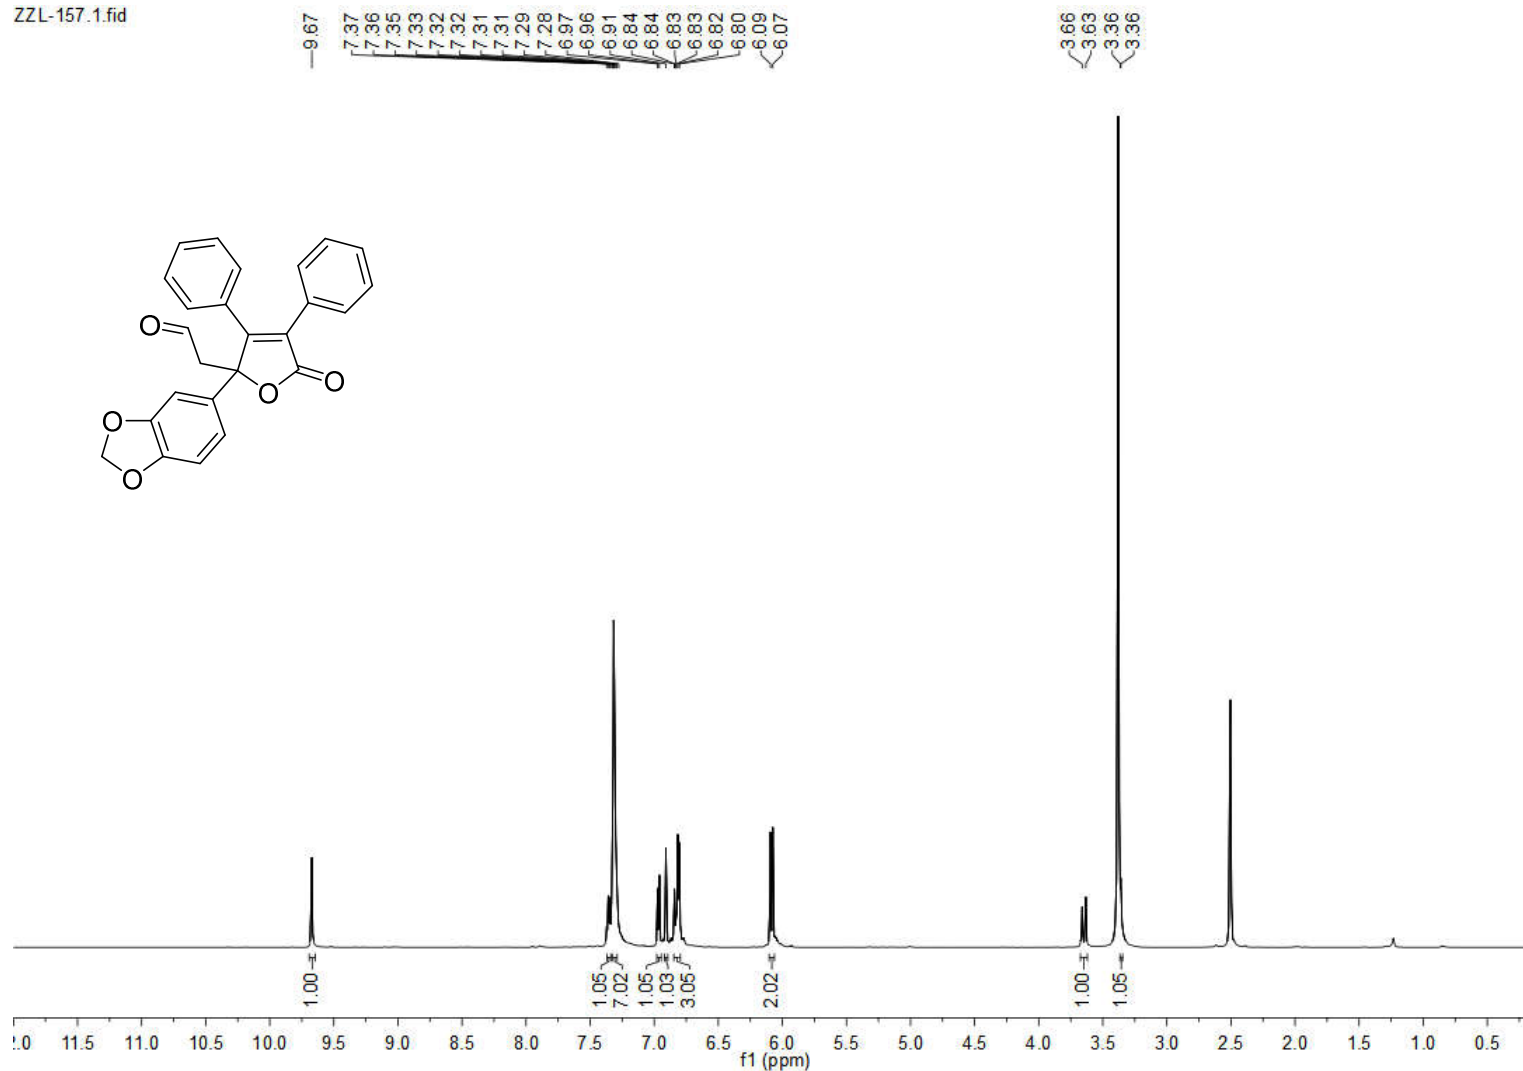

Figure S36.  $^1\text{H}$  NMR (600 MHz,  $\text{DMSO-}d_6$ ) spectra of compound **3p**

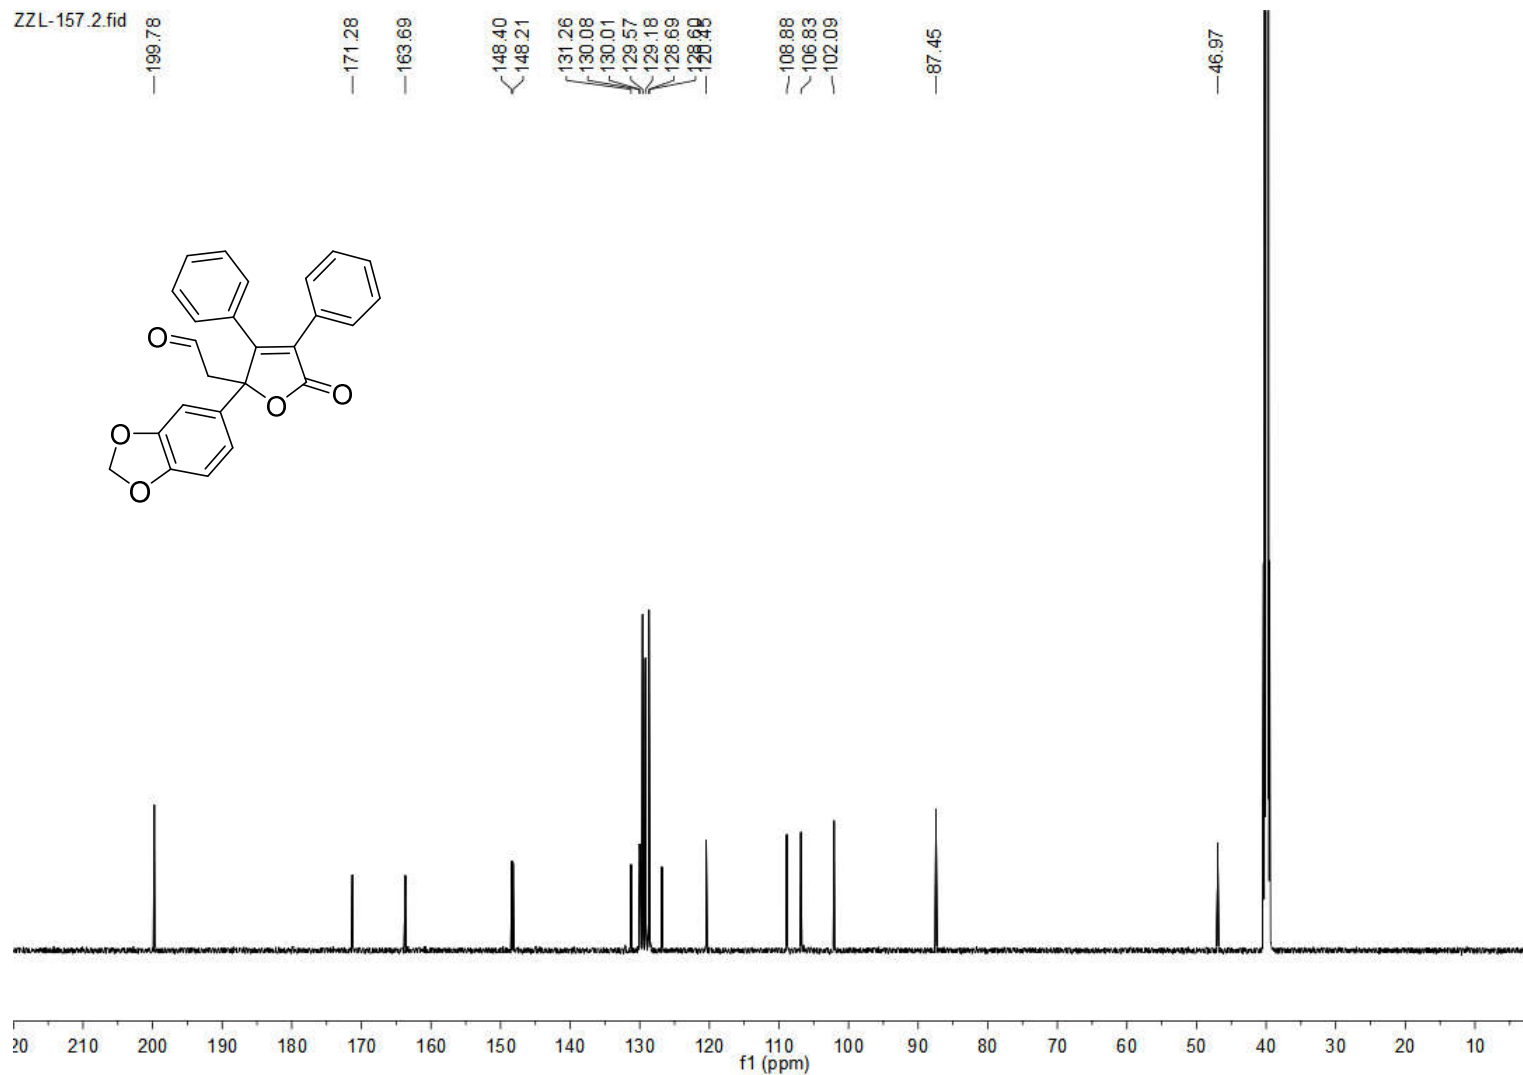

Figure S37.  $^{13}\text{C}$  NMR (150 MHz,  $\text{DMSO-}d_6$ ) spectra of compound 3p

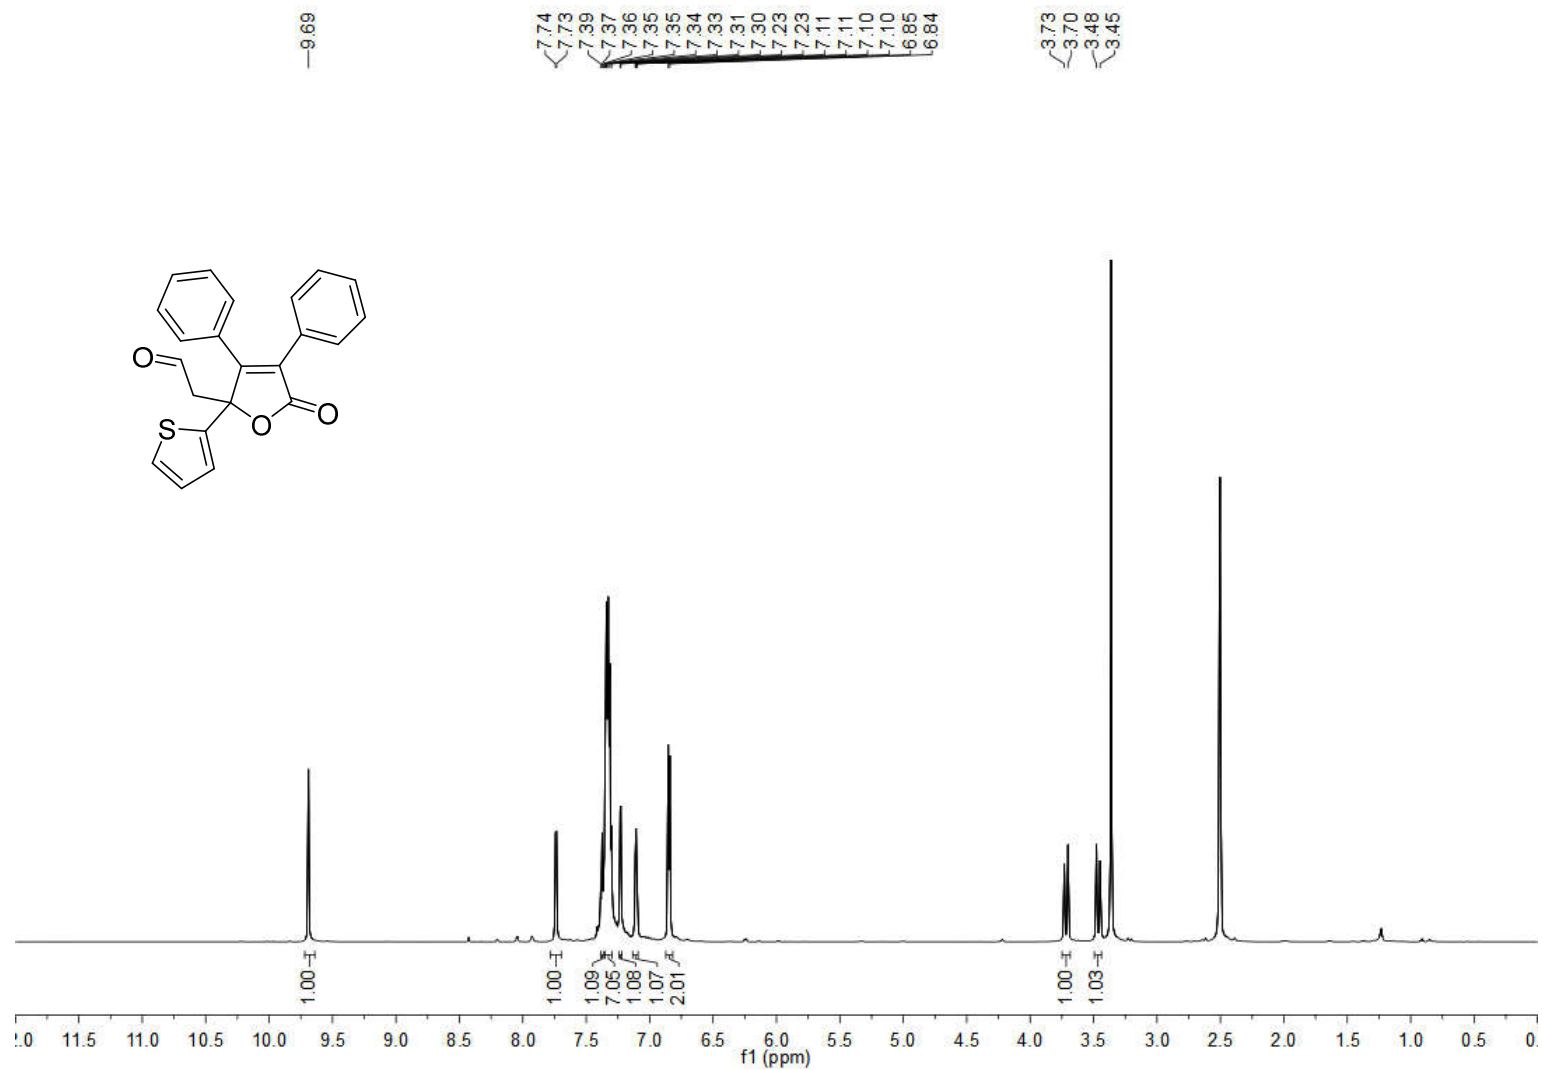

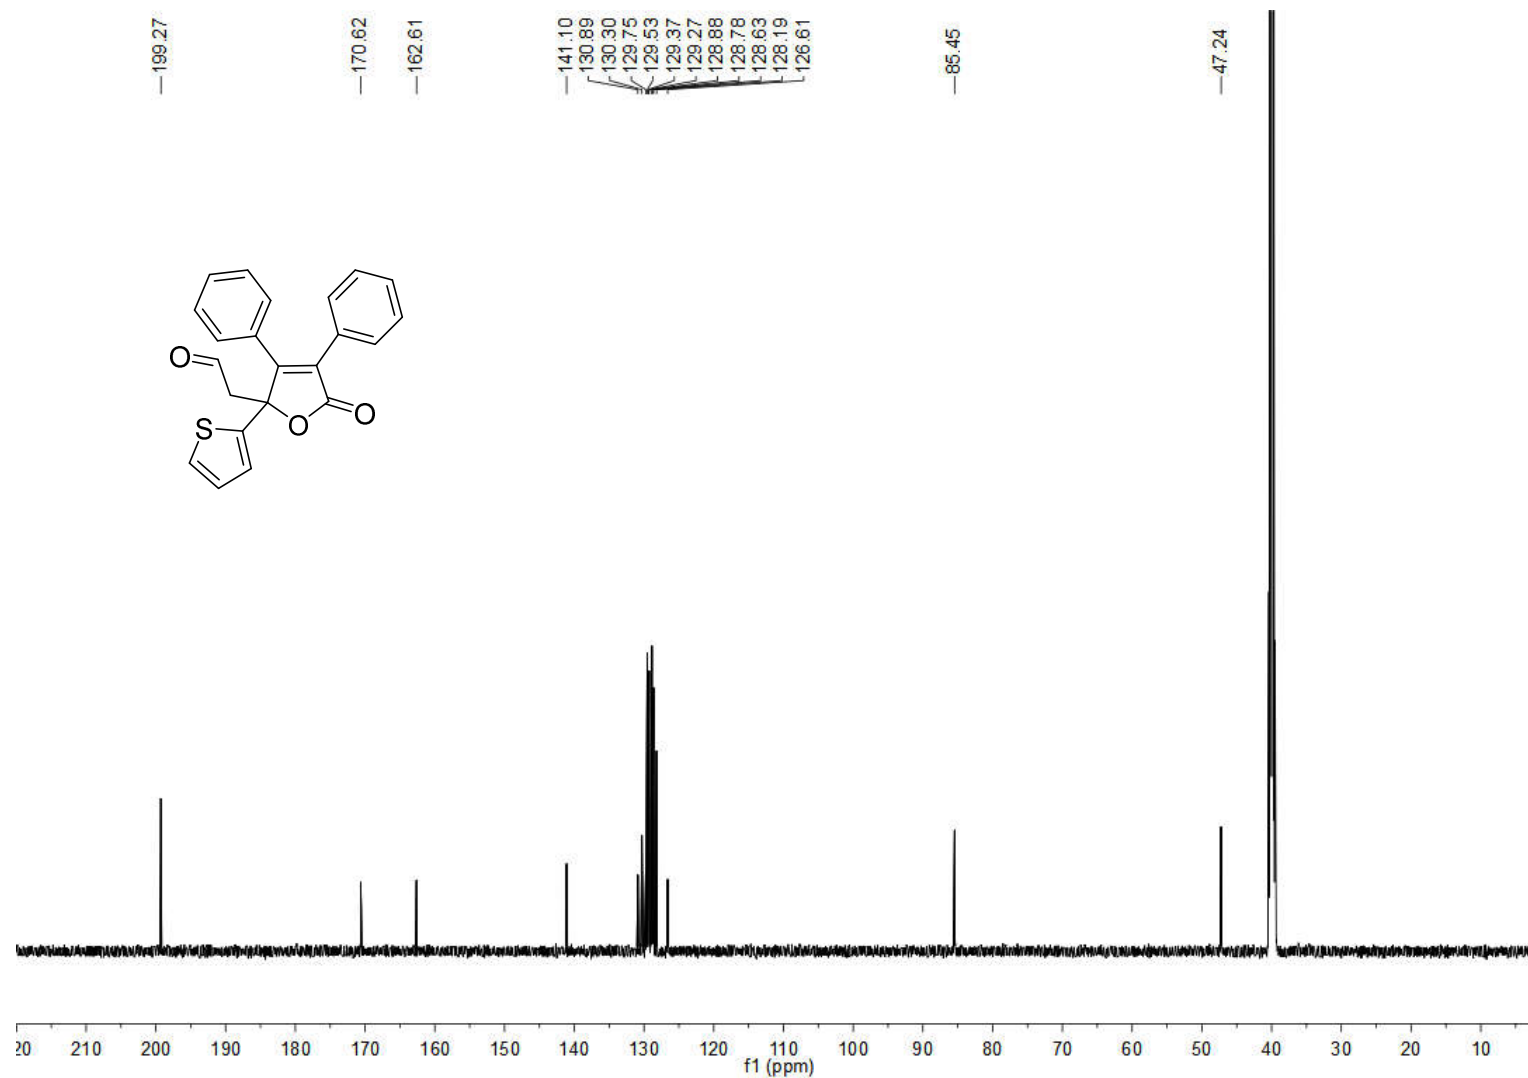

Figure S39.  $^{13}\text{C}$  NMR (150 MHz,  $\text{DMSO}-d_6$ ) spectra of compound **3q**

ZZL-161.1.fid

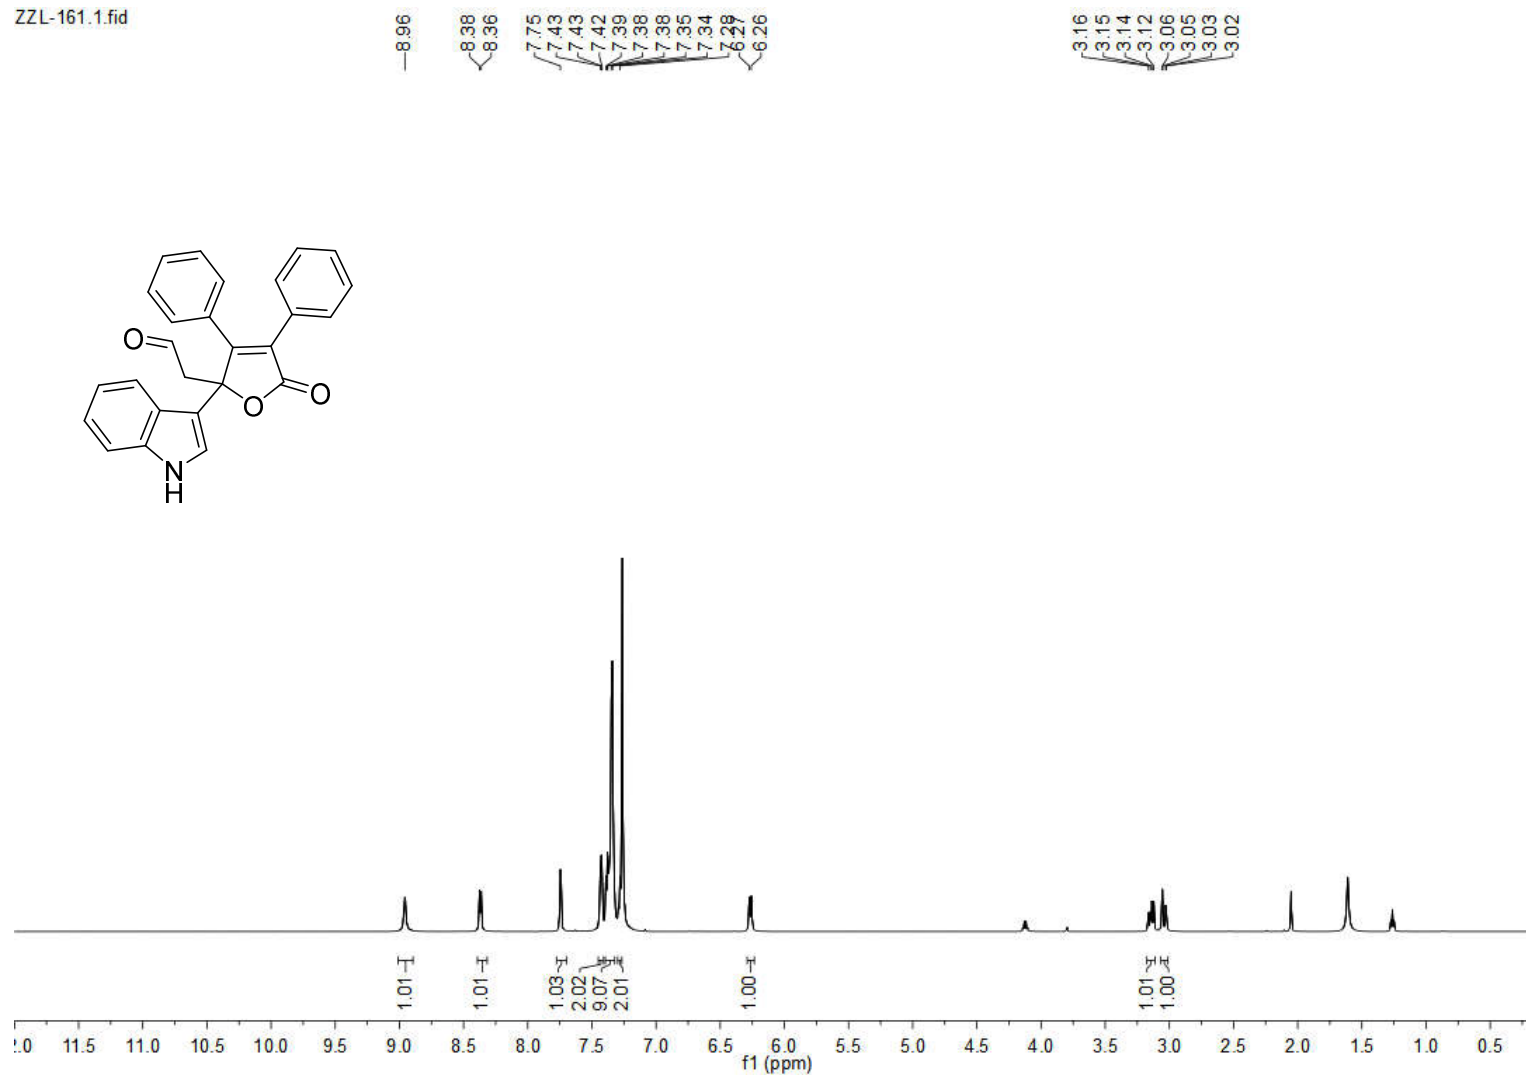

Figure S40.  $^1\text{H}$  NMR (600 MHz,  $\text{CDCl}_3$ ) spectra of compound 3r

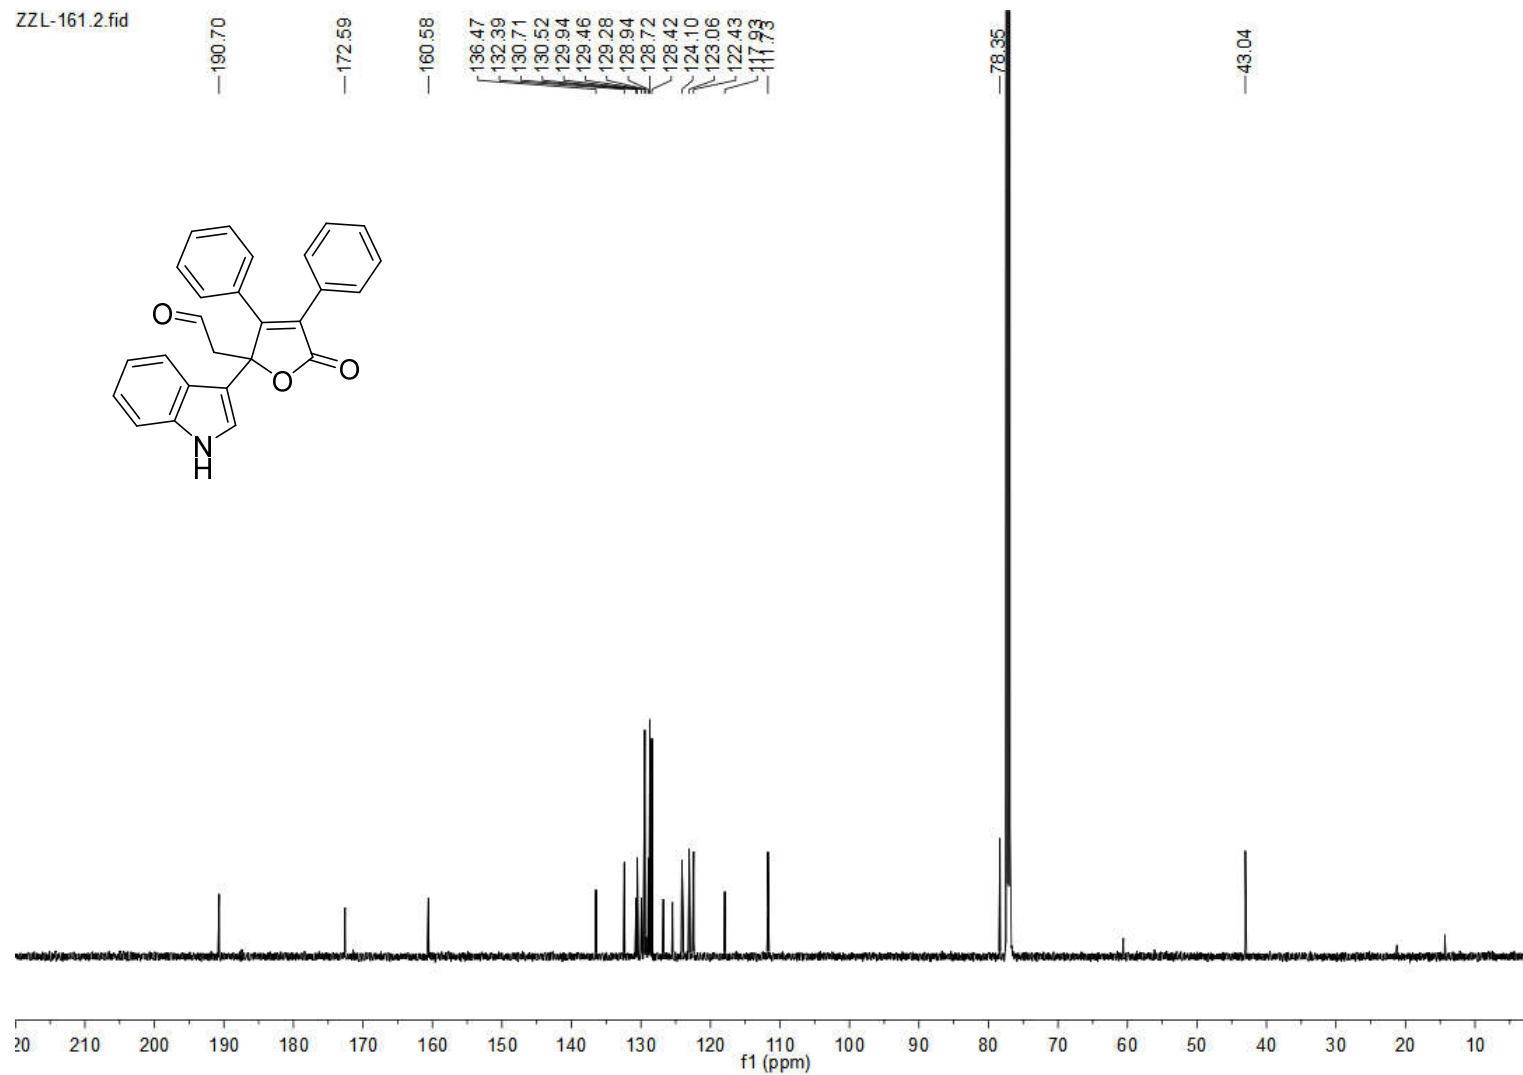

Figure S41.  $^{13}\text{C}$  NMR (150 MHz,  $\text{CDCl}_3$ ) spectra of compound **3r**

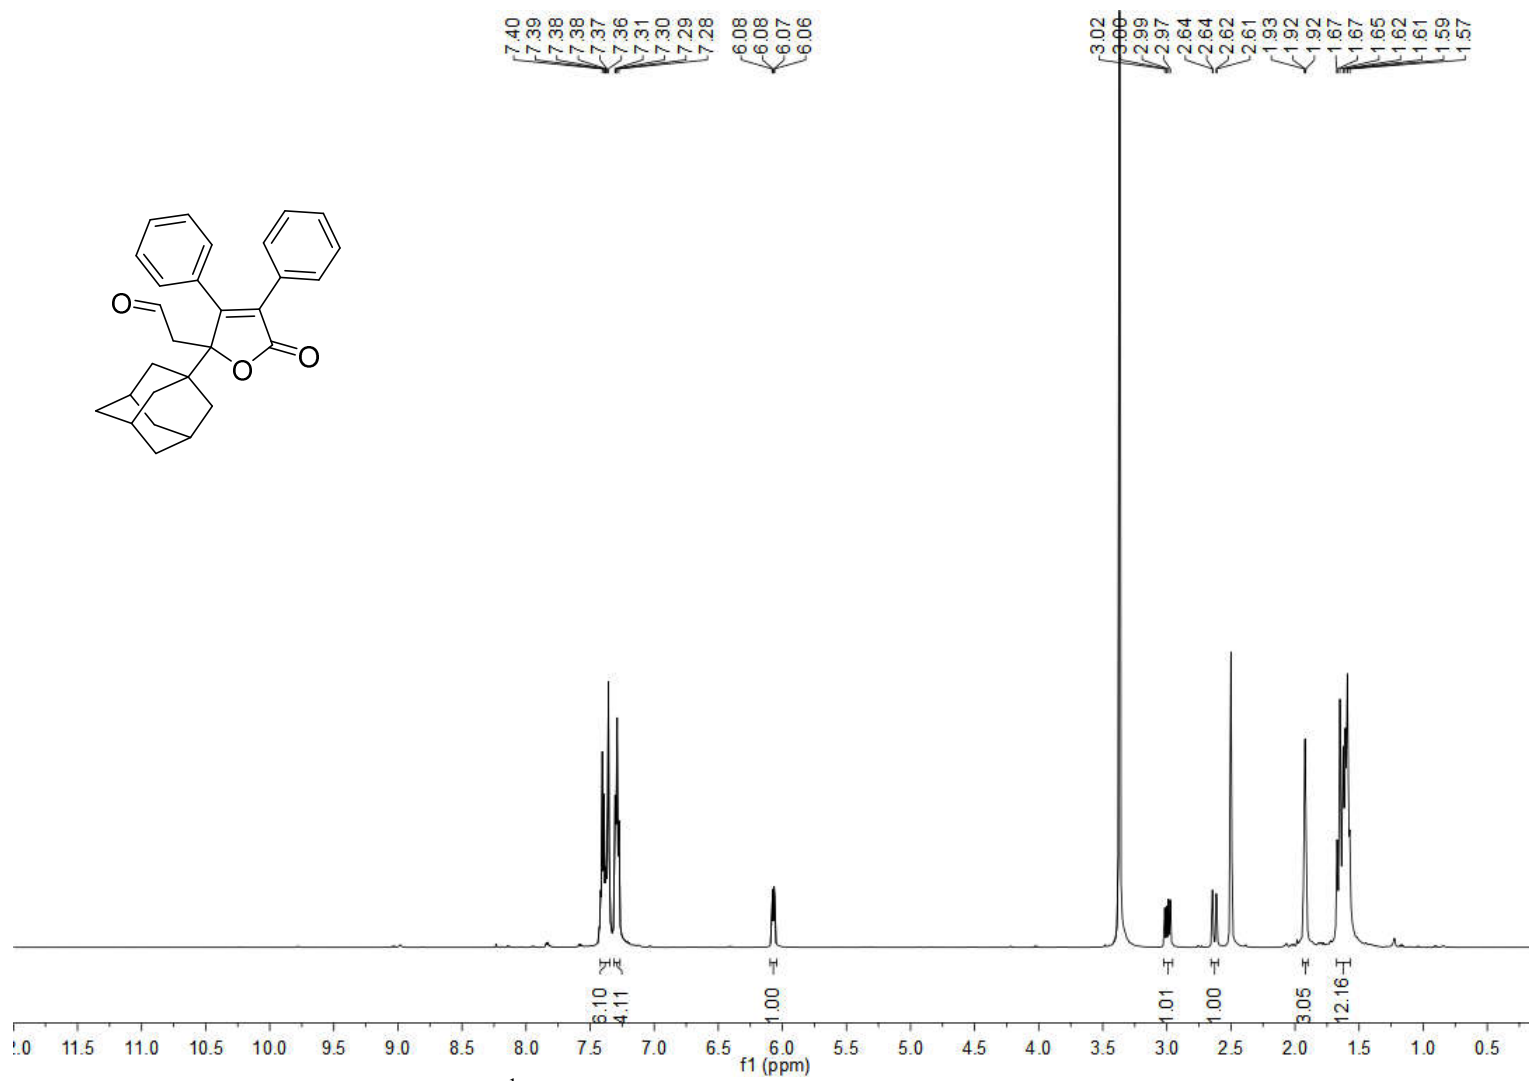

**Figure S42.** <sup>1</sup>H NMR (600 MHz, DMSO-*d*<sub>6</sub>) spectra of compound **3s**

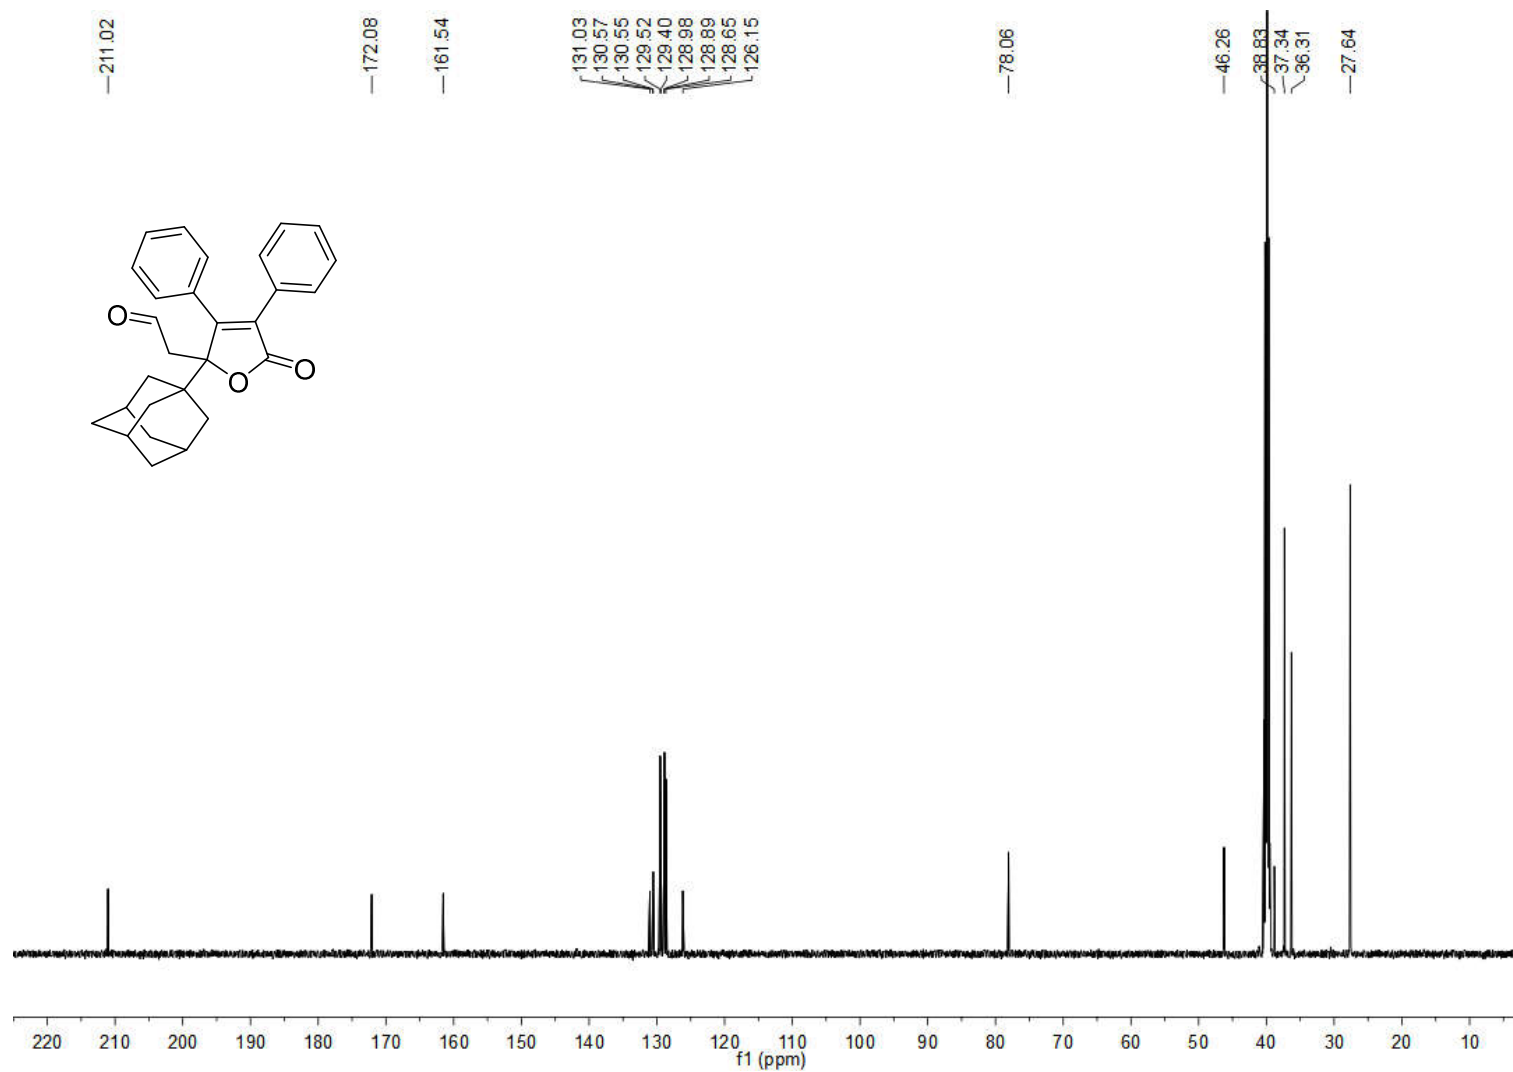

Figure S43.  $^{13}\text{C}$  NMR (150 MHz,  $\text{DMSO-}d_6$ ) spectra of compound 3s



ZZL-169.1.fid

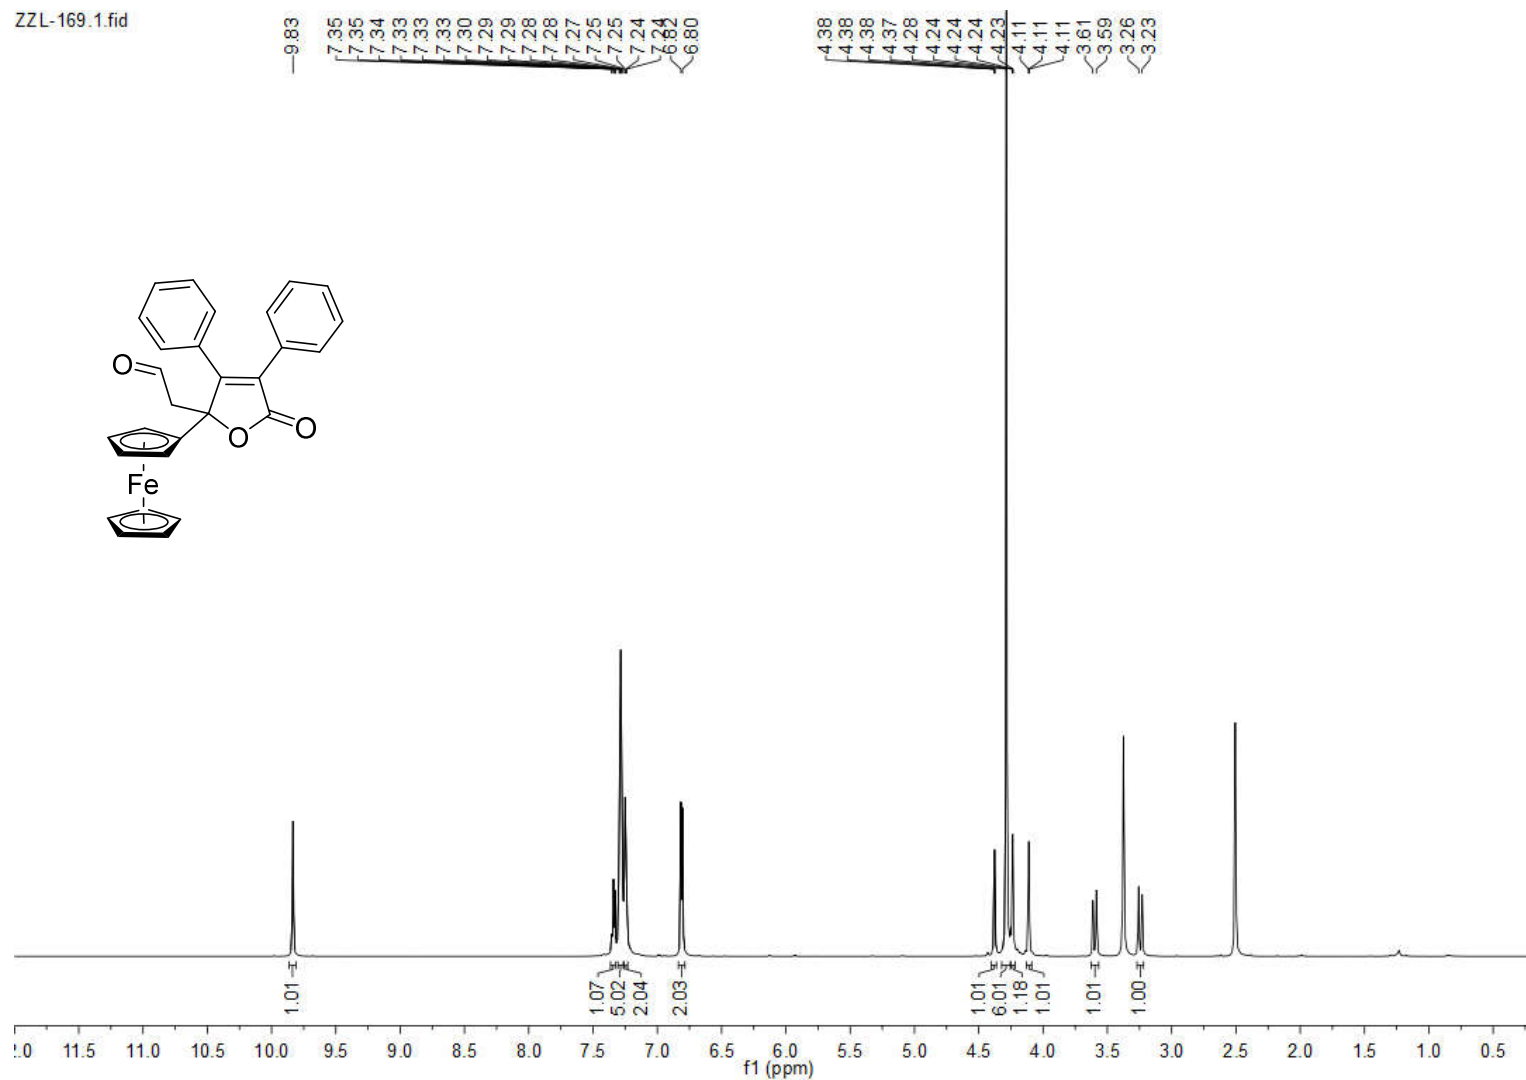

Figure S44.  $^1\text{H}$  NMR (600 MHz,  $\text{DMSO-}d_6$ ) spectra of compound 3t

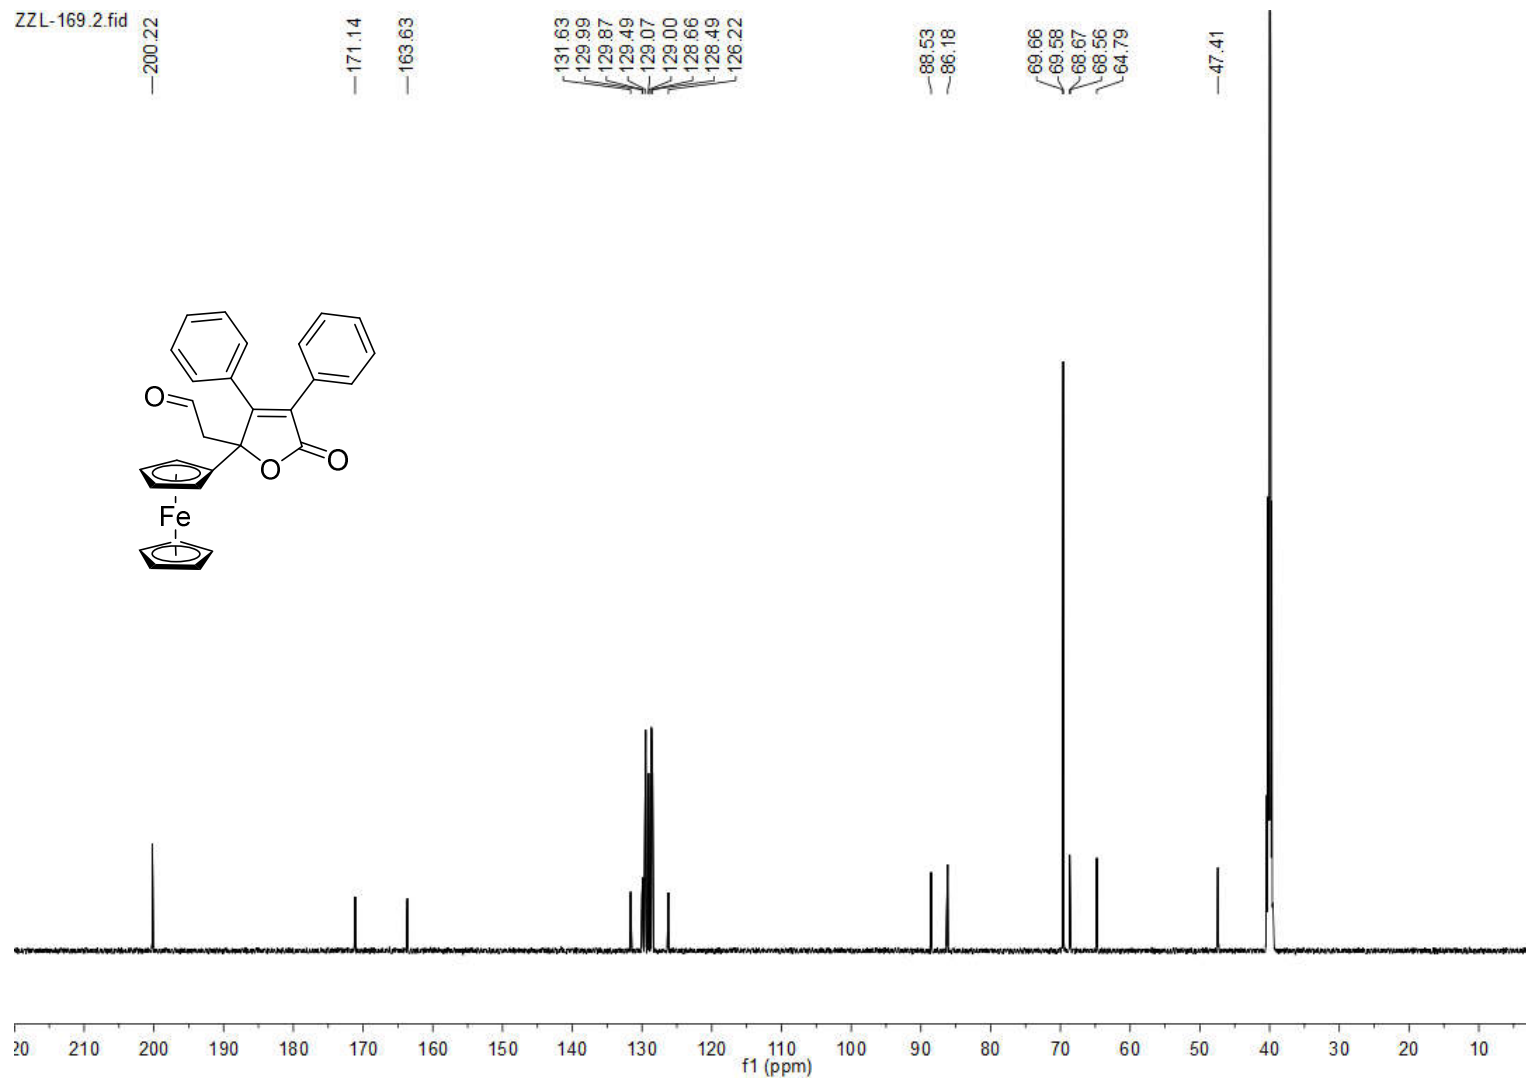

**Figure S45.**  $^{13}\text{C}$  NMR (150 MHz,  $\text{DMSO-}d_6$ ) spectra of compound **3t**

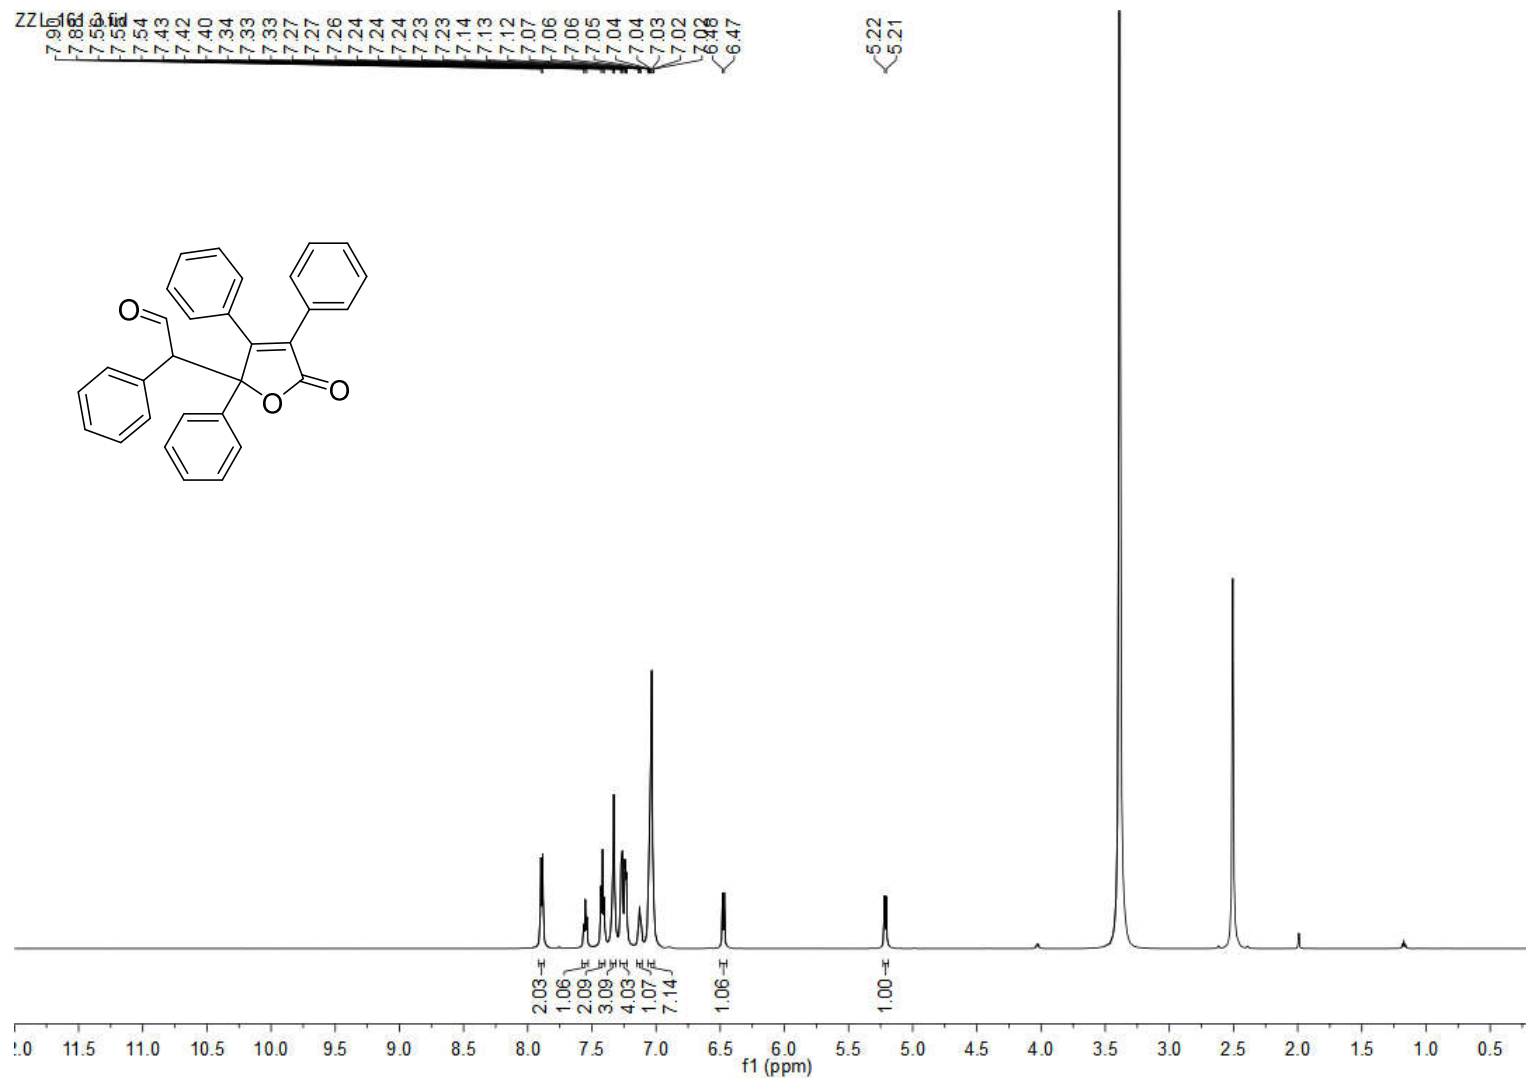

**Figure S46.**  $^1\text{H}$  NMR (600 MHz,  $\text{DMSO-}d_6$ ) spectra of compound **3u**

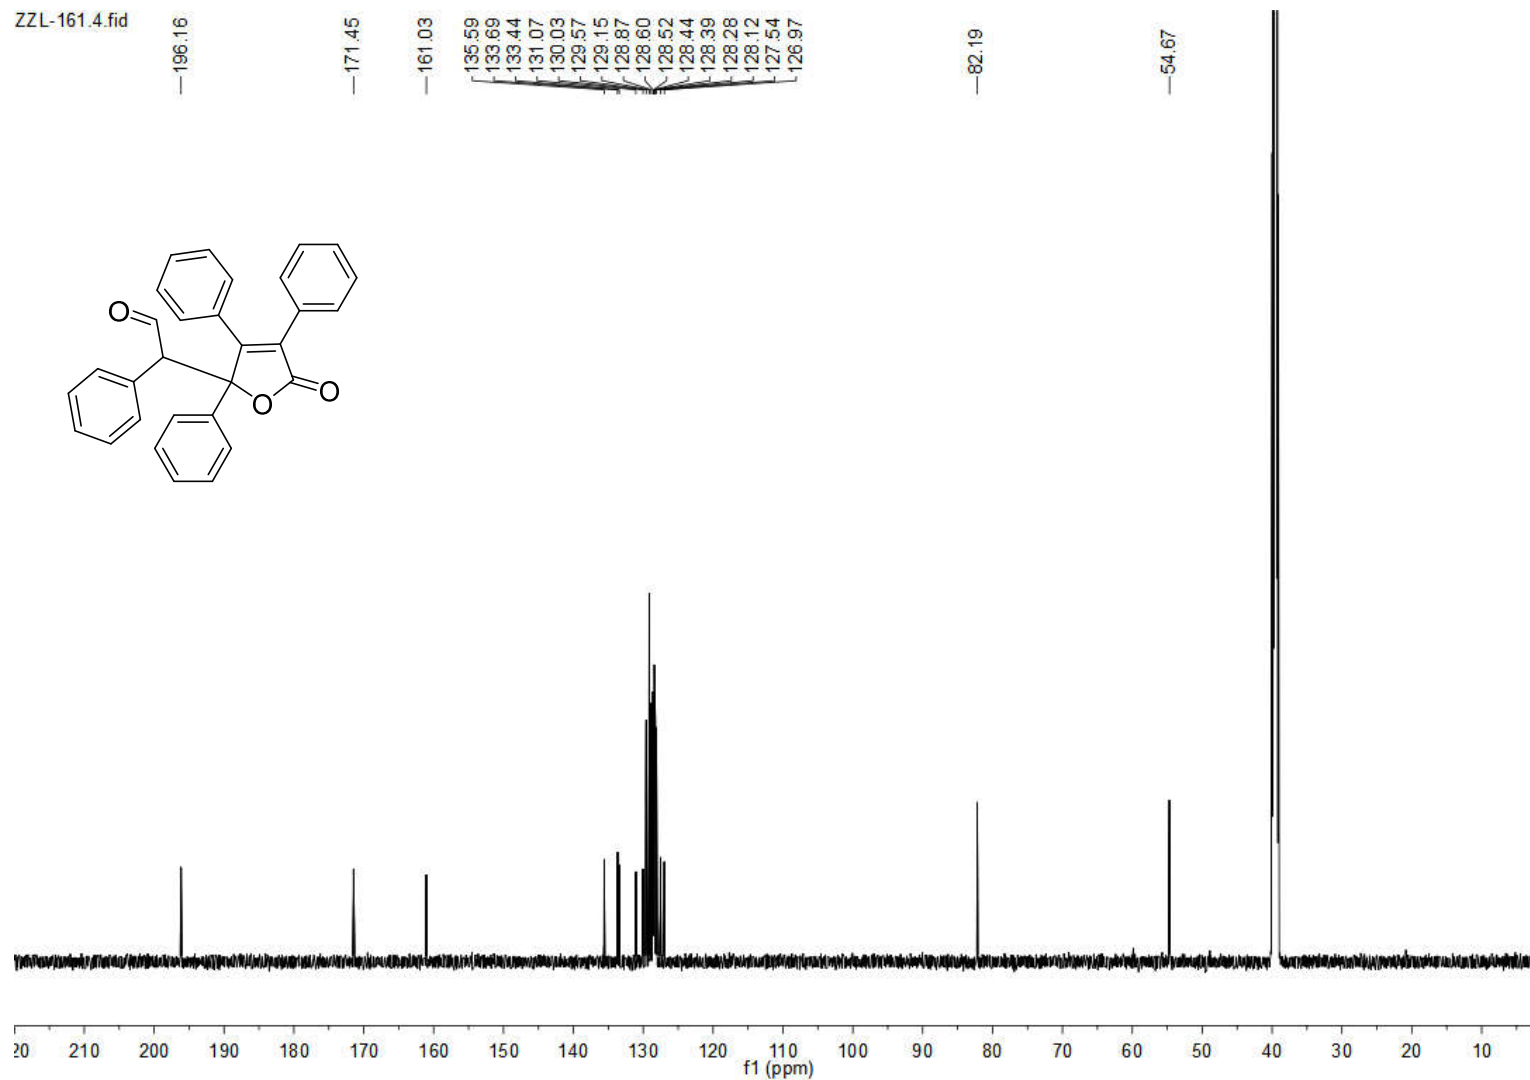

**Figure S47.**  $^{13}\text{C}$  NMR (150 MHz,  $\text{DMSO-}d_6$ ) spectra of compound **3u**

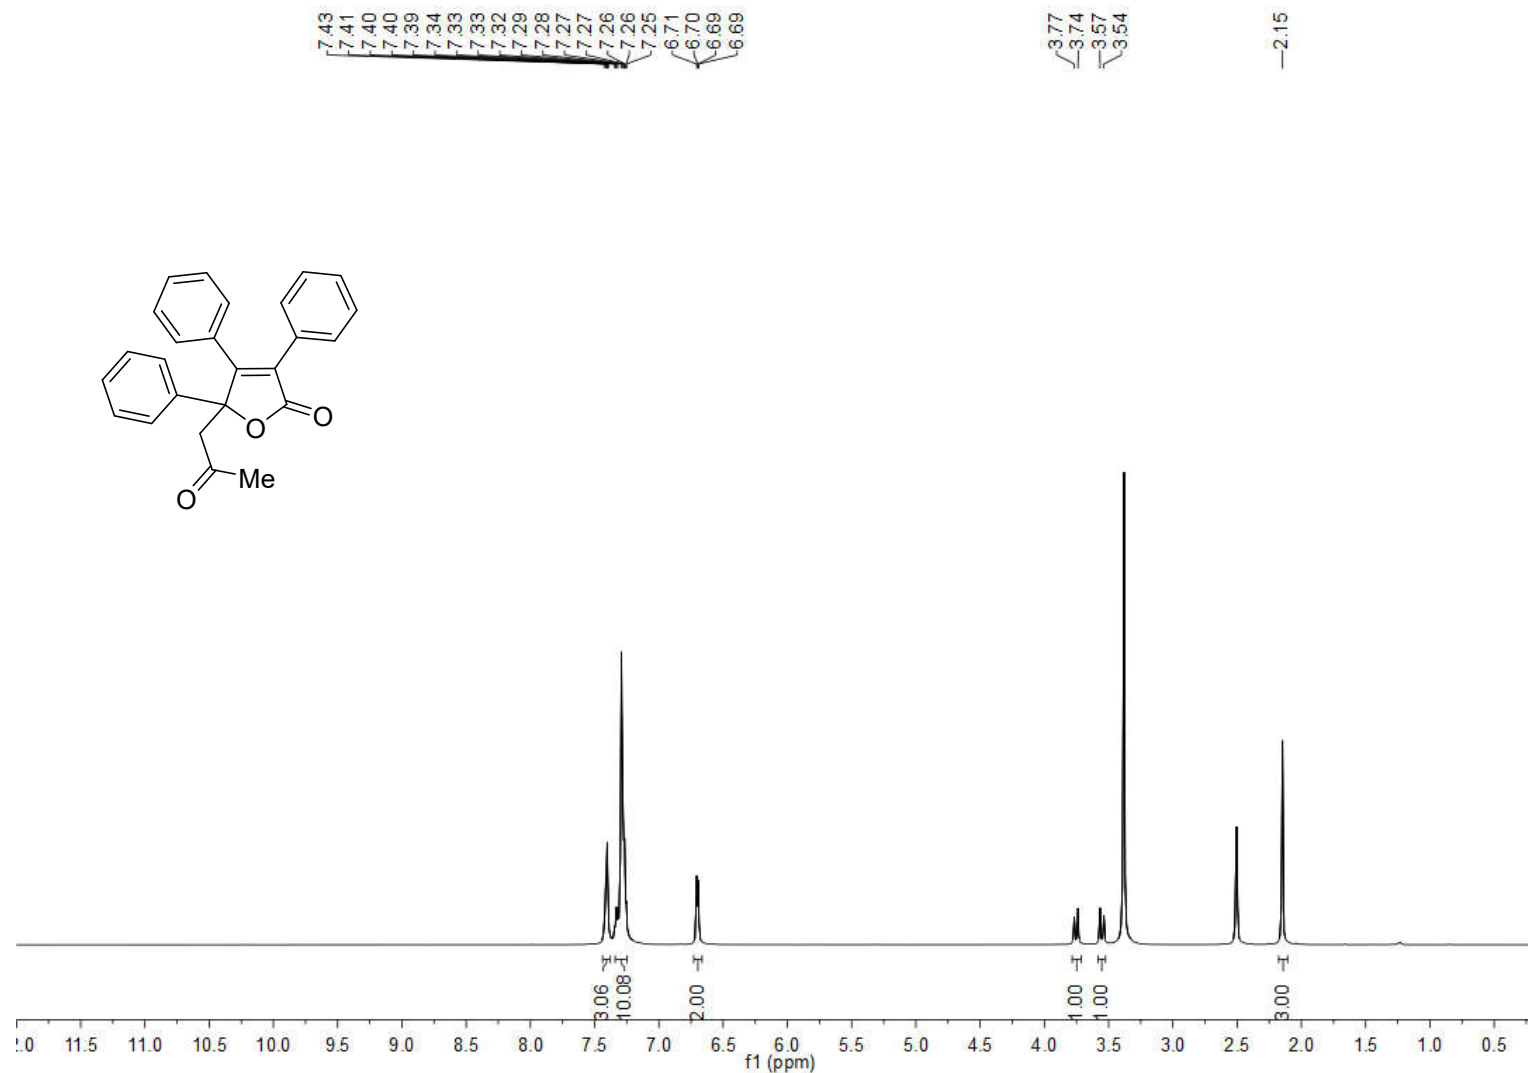

**Figure S48.** <sup>1</sup>H NMR (600 MHz, DMSO-*d*<sub>6</sub>) spectra of compound 3v

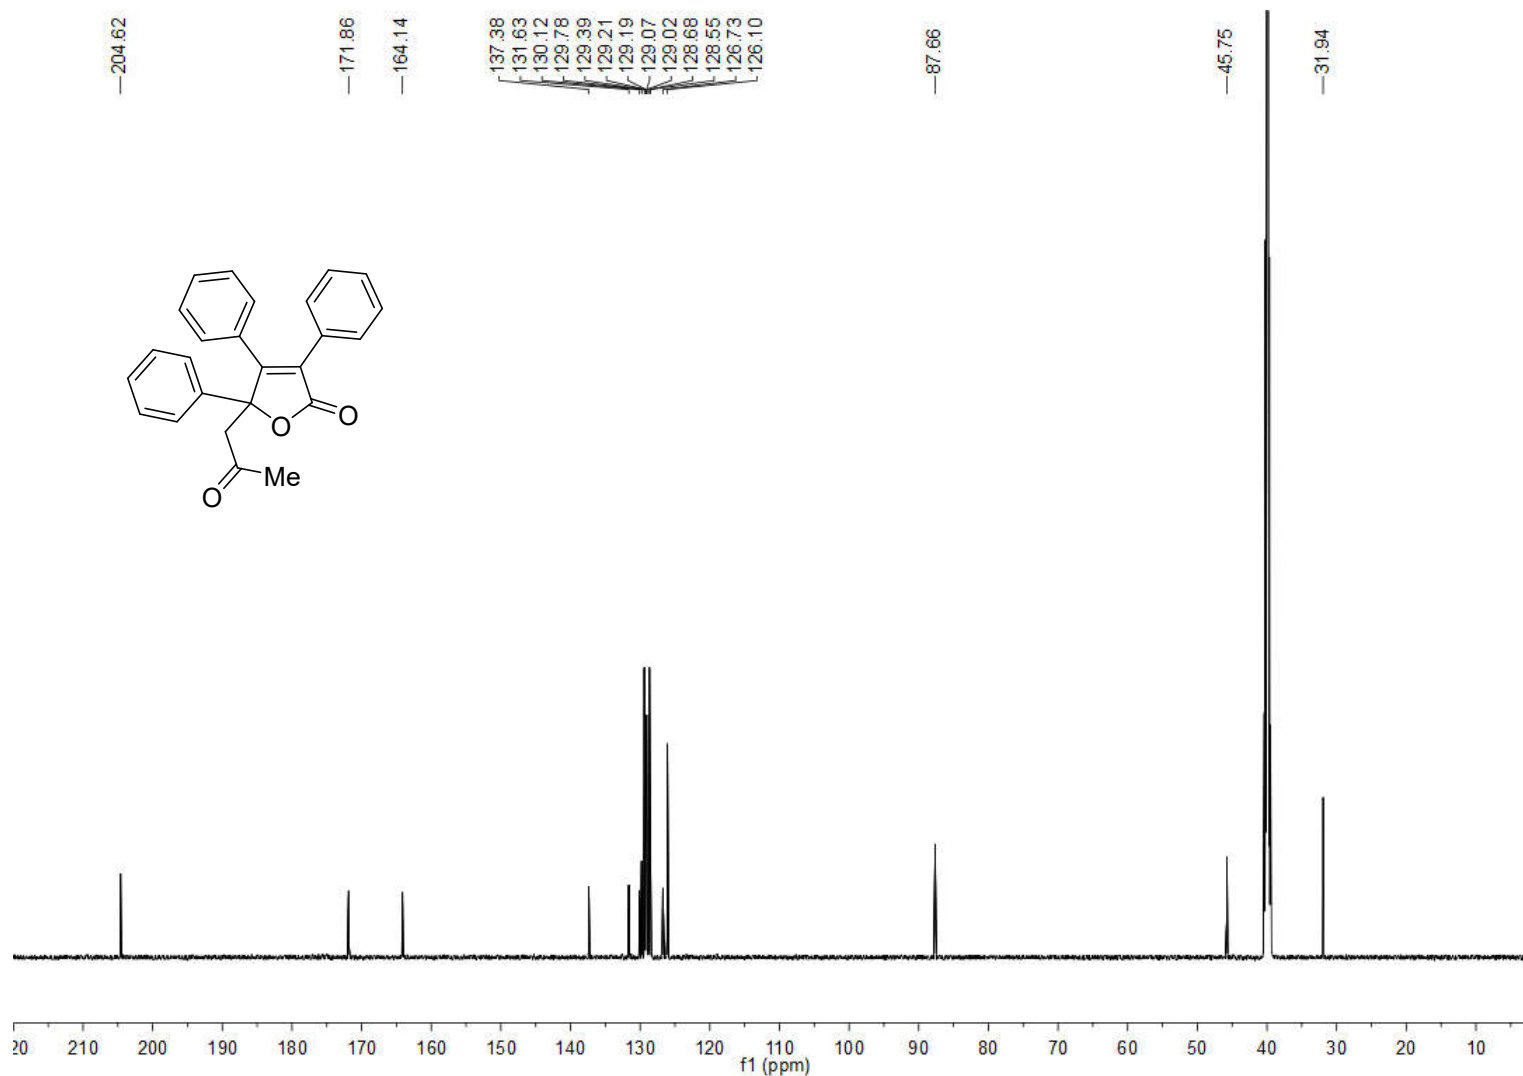

Figure S49.  $^{13}\text{C}$  NMR (150 MHz,  $\text{DMSO-}d_6$ ) spectra of compound 3v

ZZL-186.1.fid

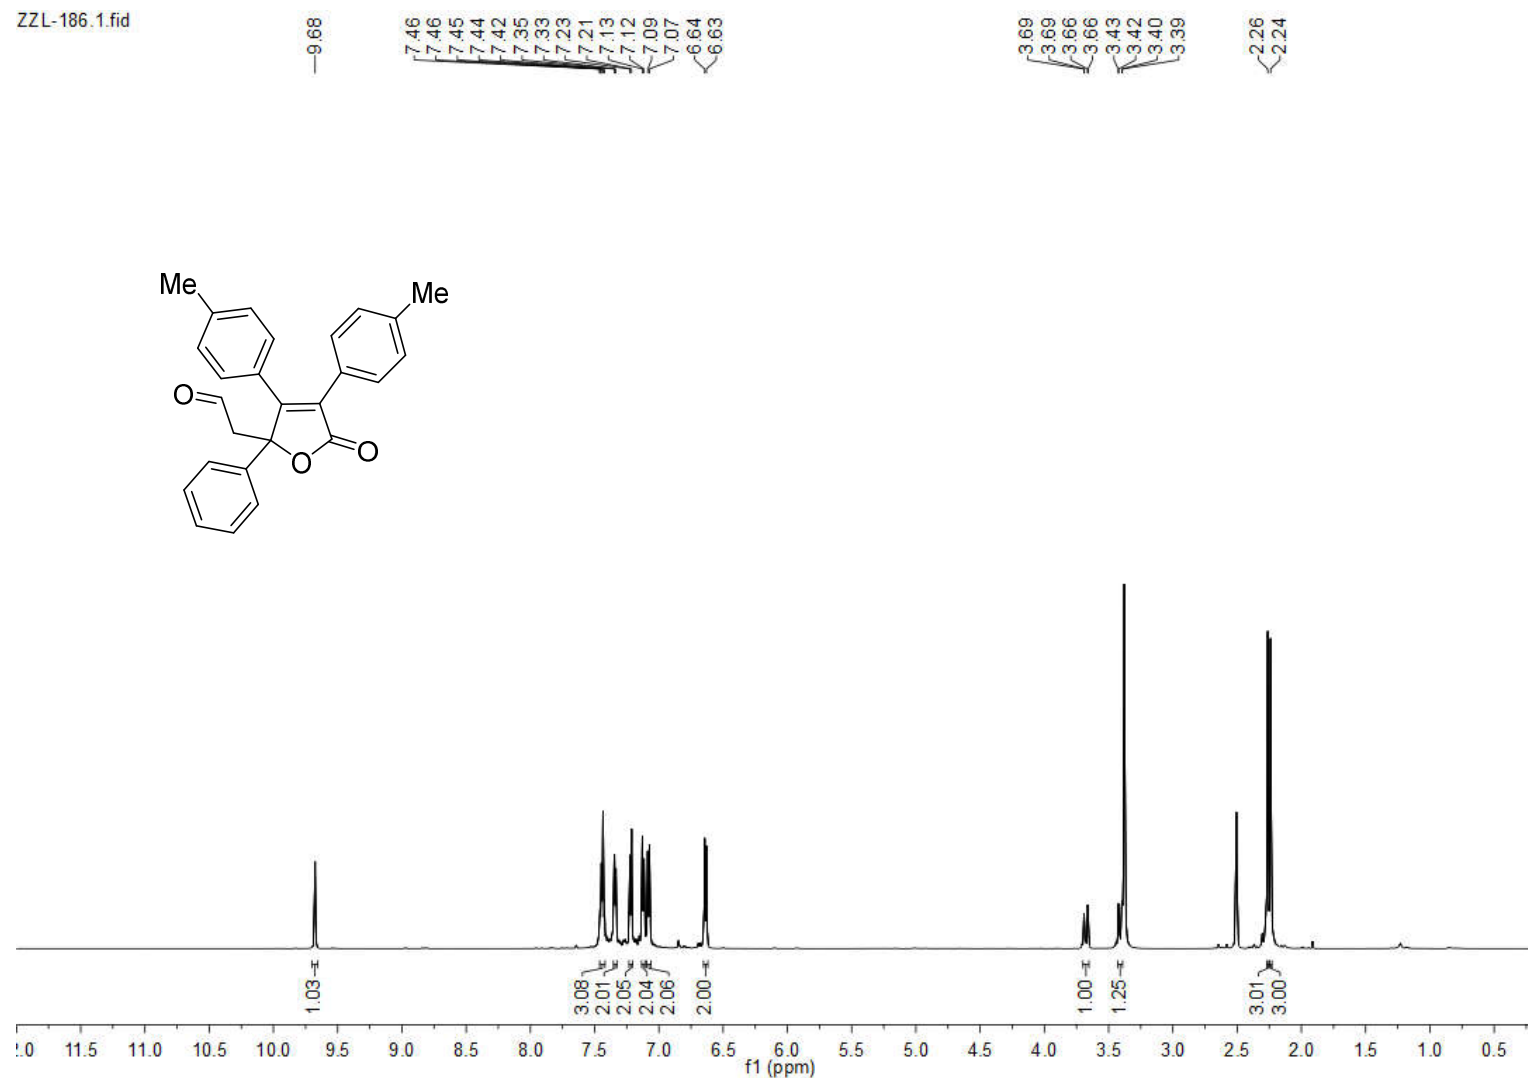

Figure S50. <sup>1</sup>H NMR (600 MHz, DMSO-*d*<sub>6</sub>) spectra of compound 3w

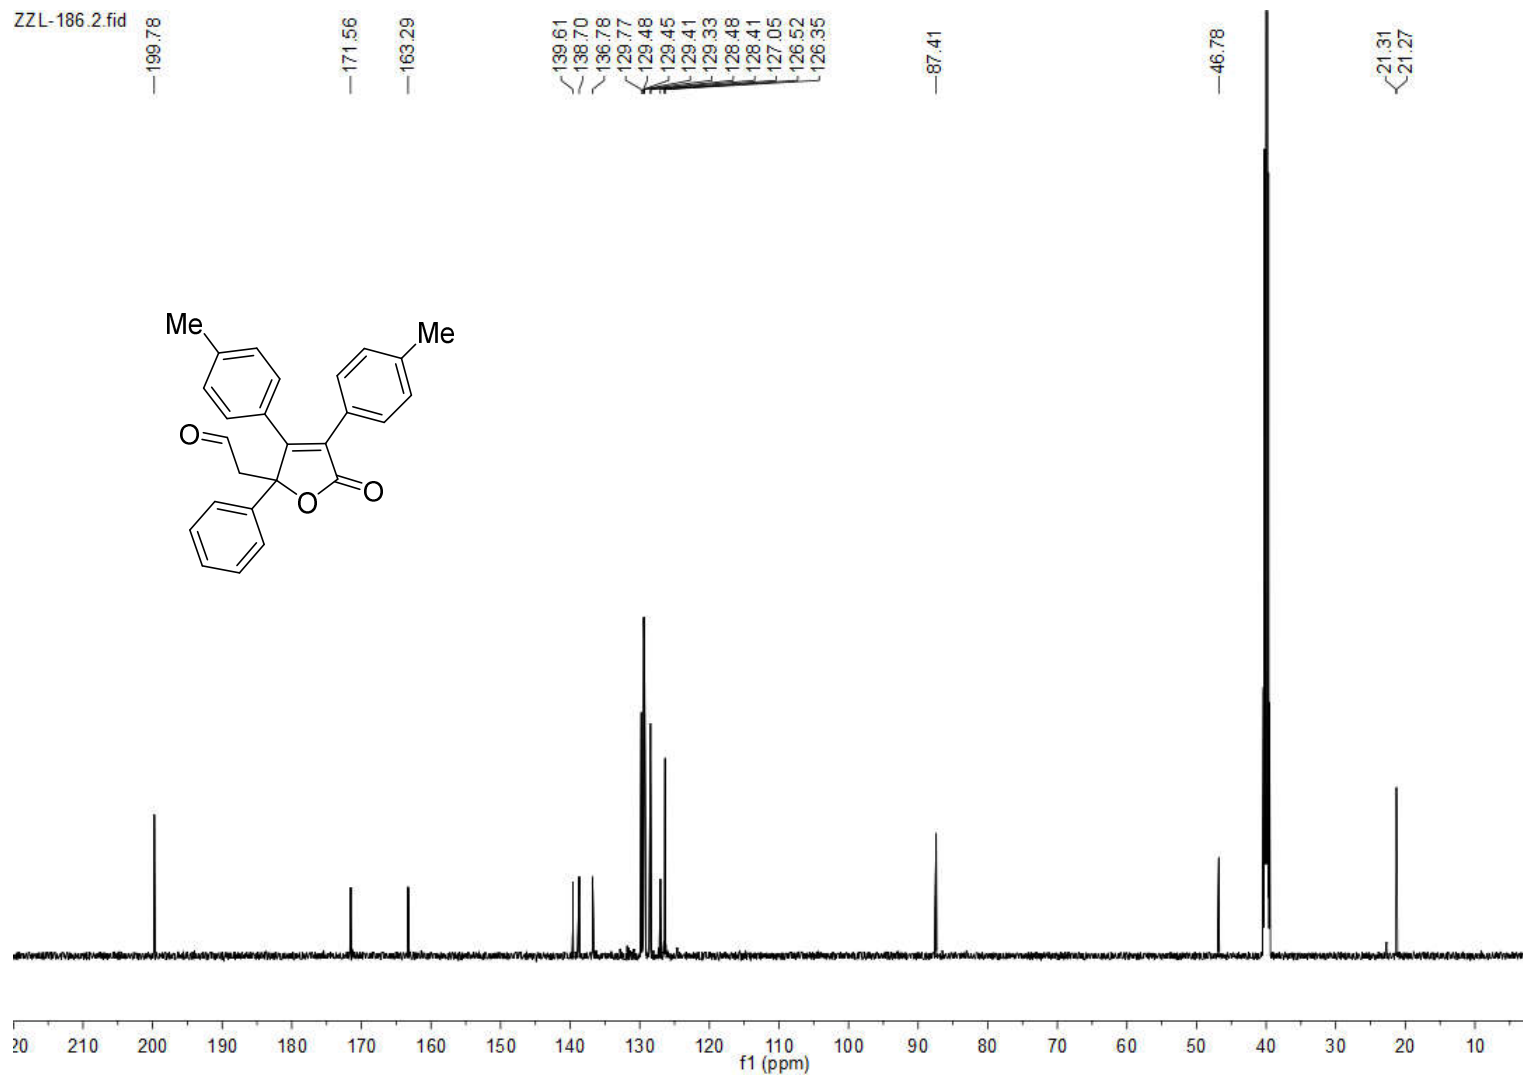

Figure S51.  $^{13}\text{C}$  NMR (150 MHz,  $\text{DMSO-}d_6$ ) spectra of compound **3w**



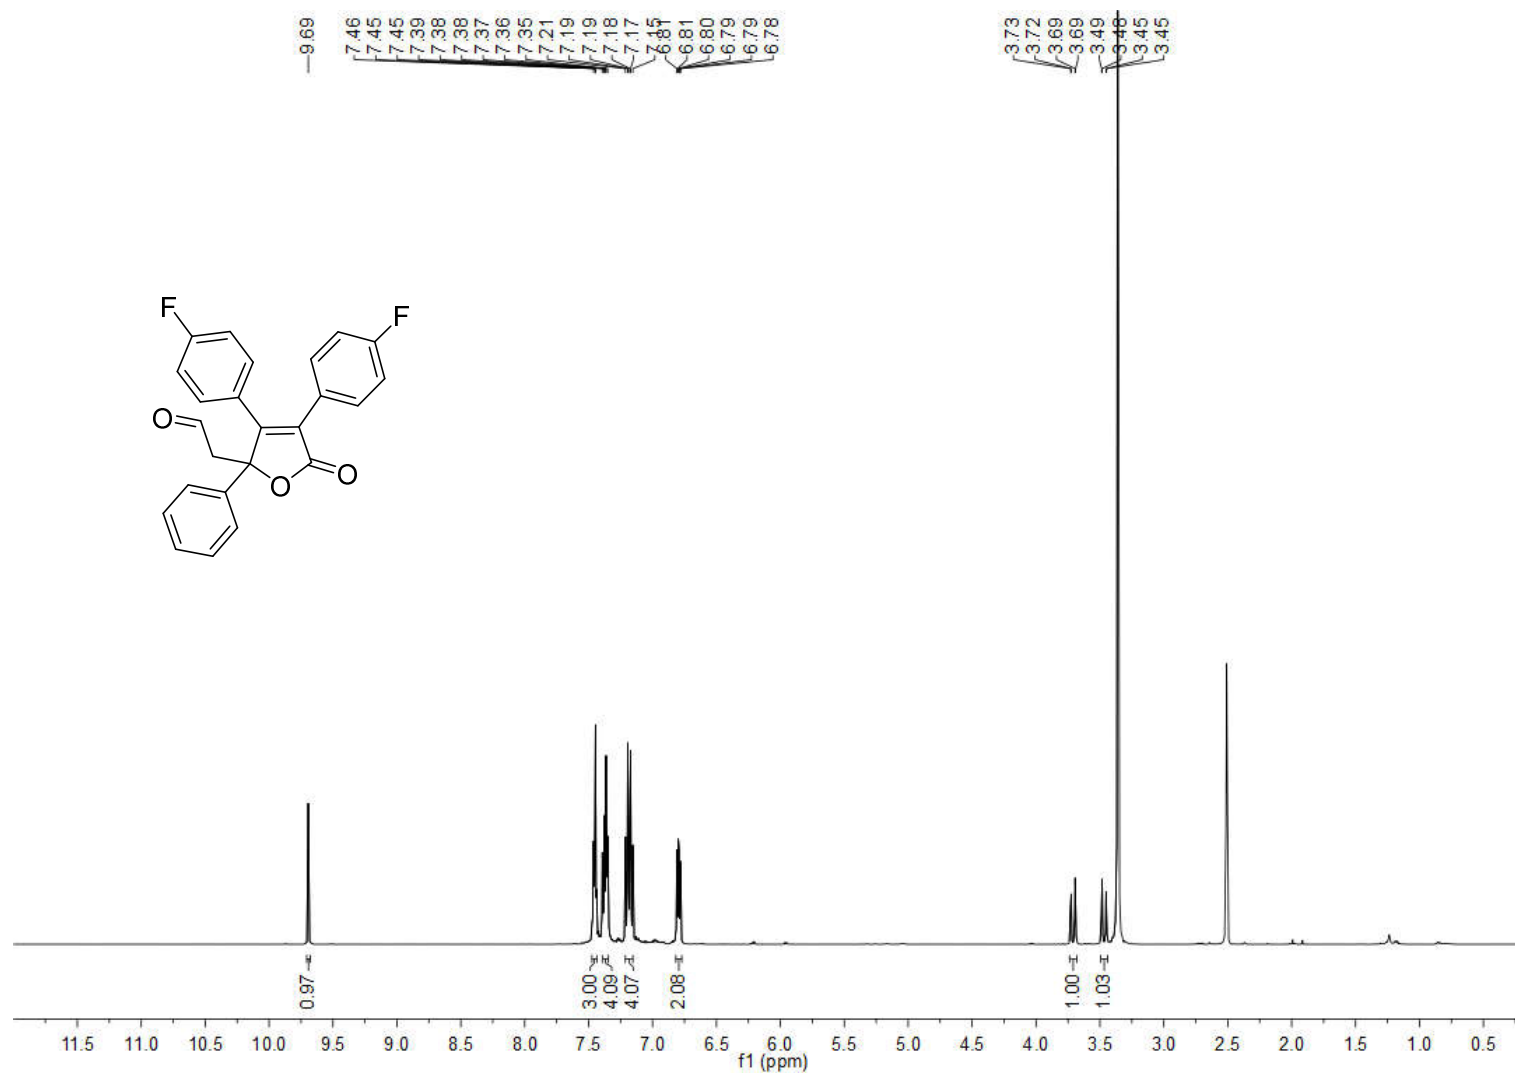

Figure S52. <sup>1</sup>H NMR (500 MHz, DMSO-*d*<sub>6</sub>) spectra of compound 3x

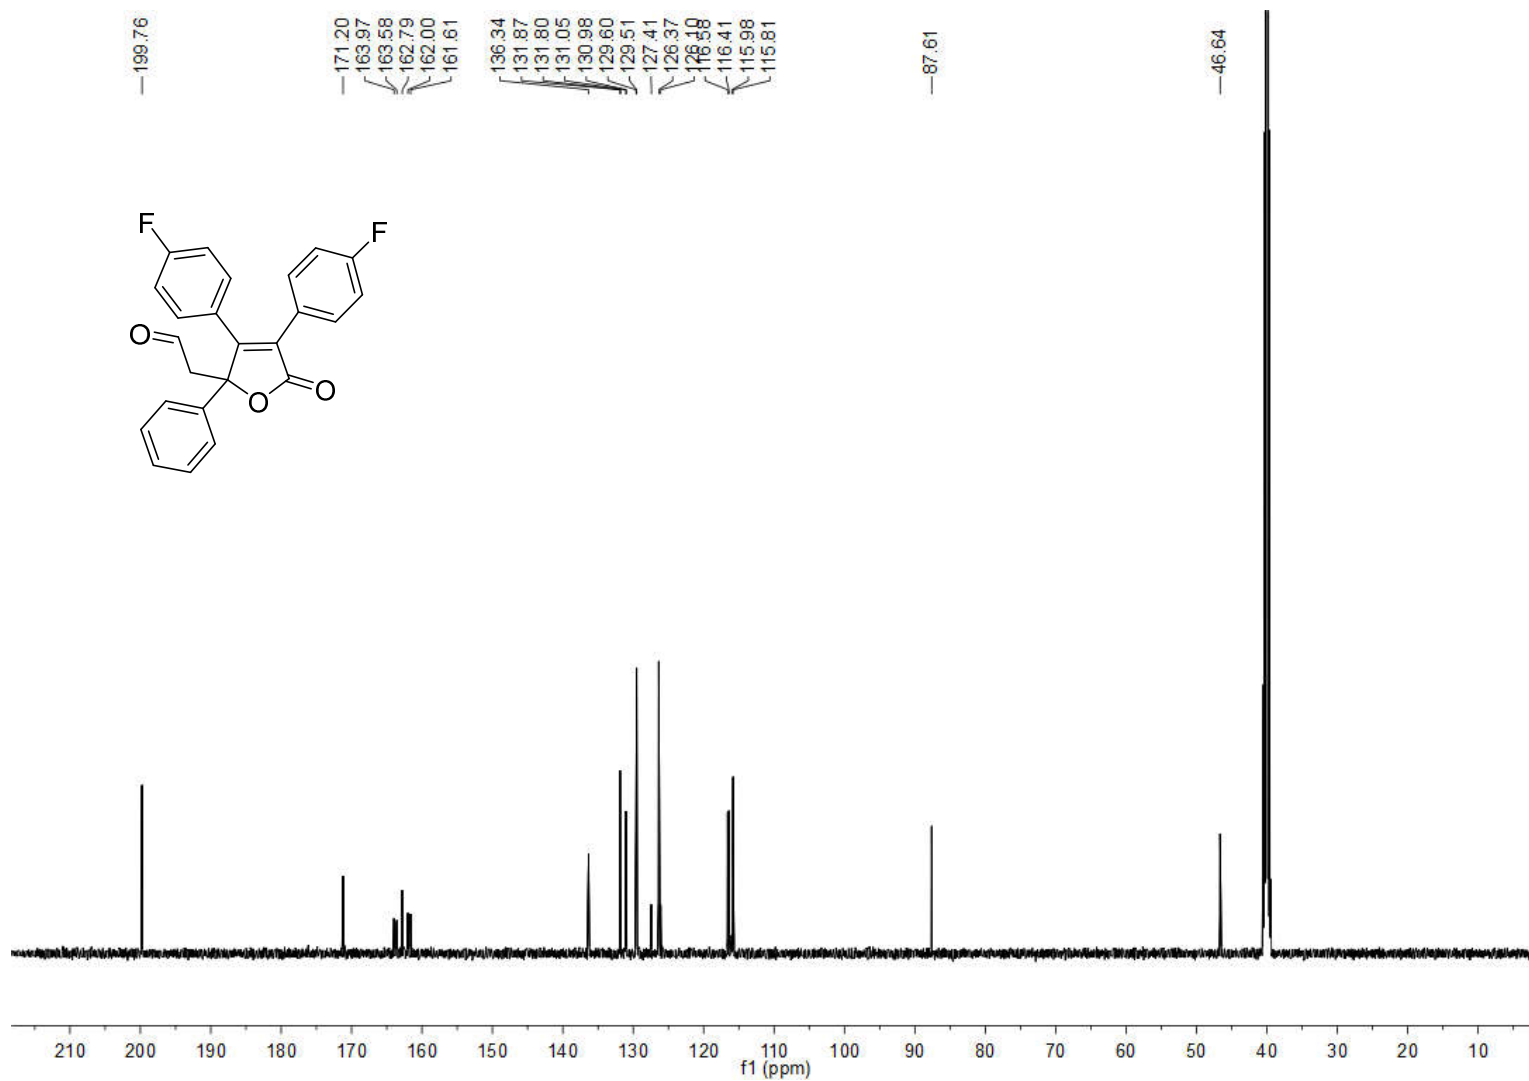

Figure S53. <sup>13</sup>C NMR (125 MHz, DMSO-*d*<sub>6</sub>) spectra of compound 3x

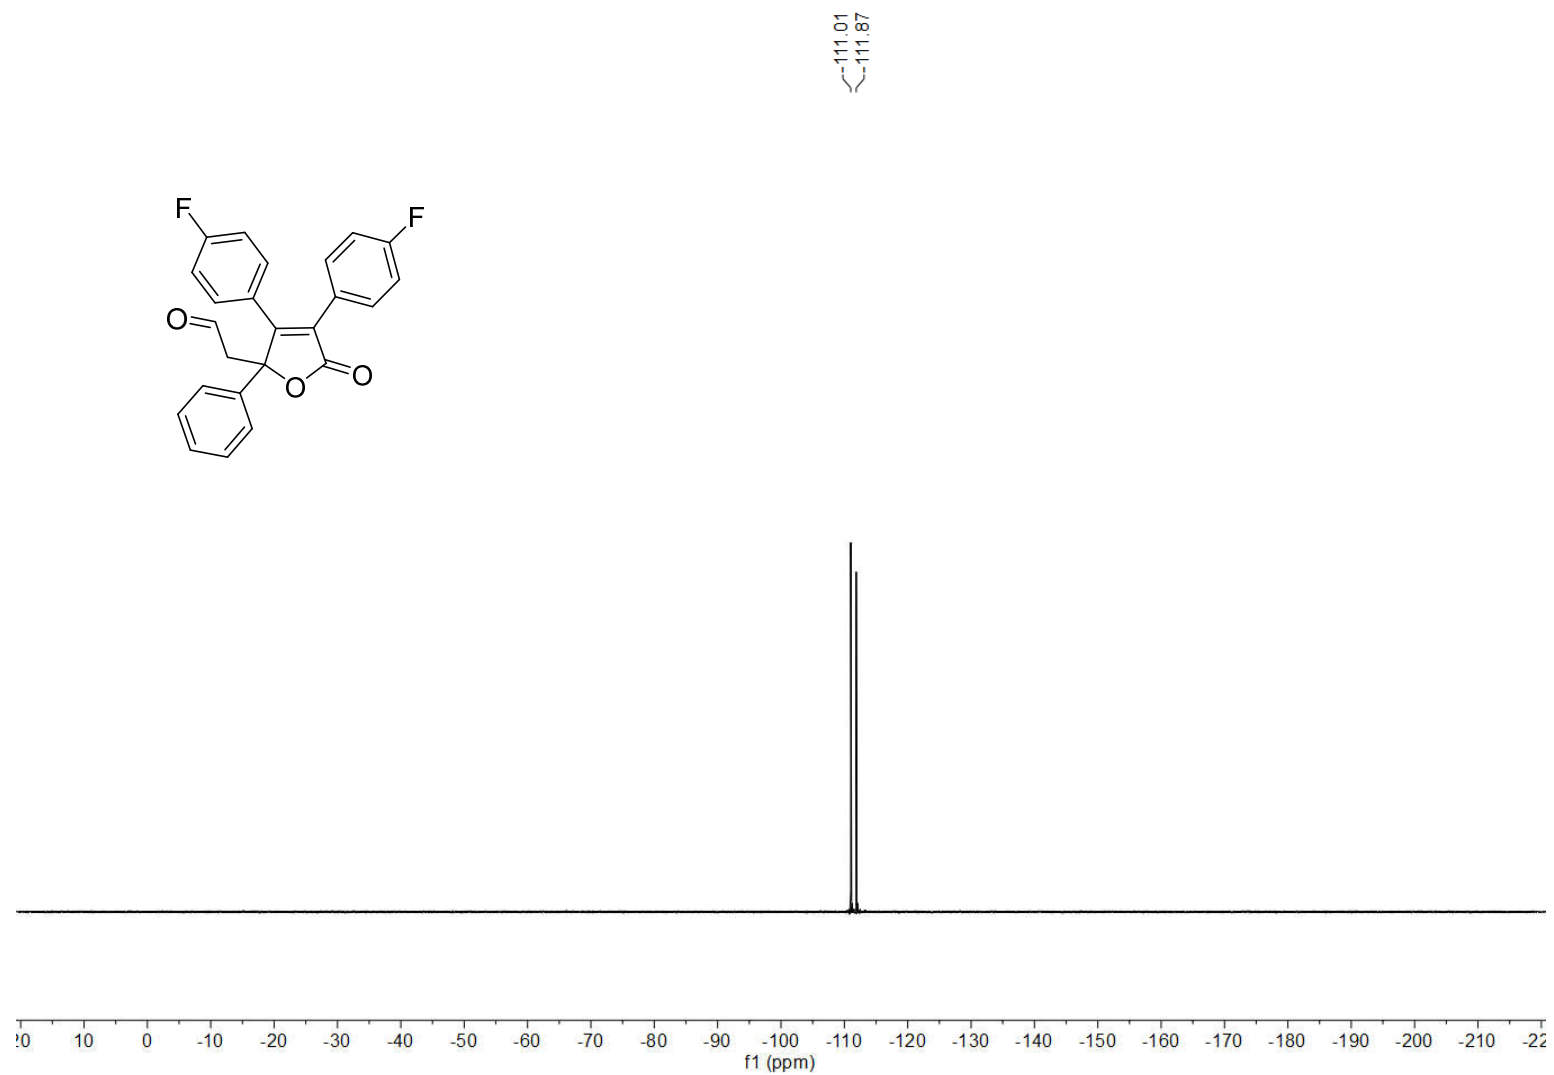

**Figure S54.**  $^{19}\text{F}$  NMR (470 MHz,  $\text{DMSO-}d_6$ ) spectra of compound **3x**

ZZL-182.1.fid

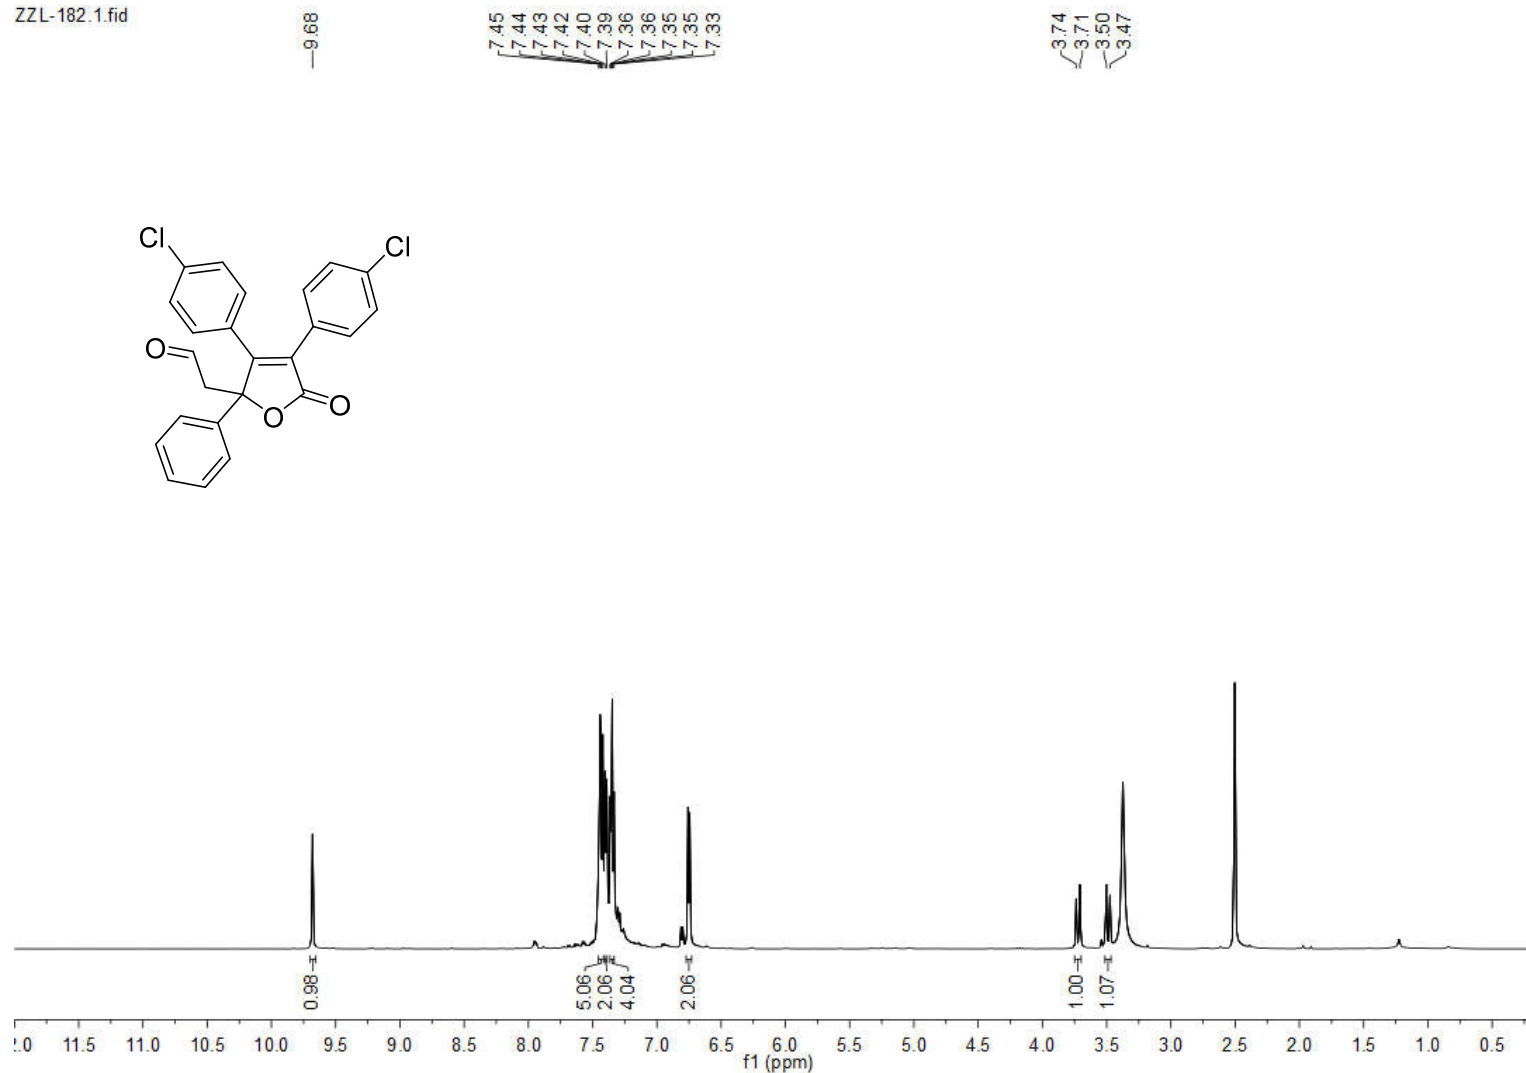

Figure S55. <sup>1</sup>H NMR (600 MHz, DMSO-*d*<sub>6</sub>) spectra of compound 3y

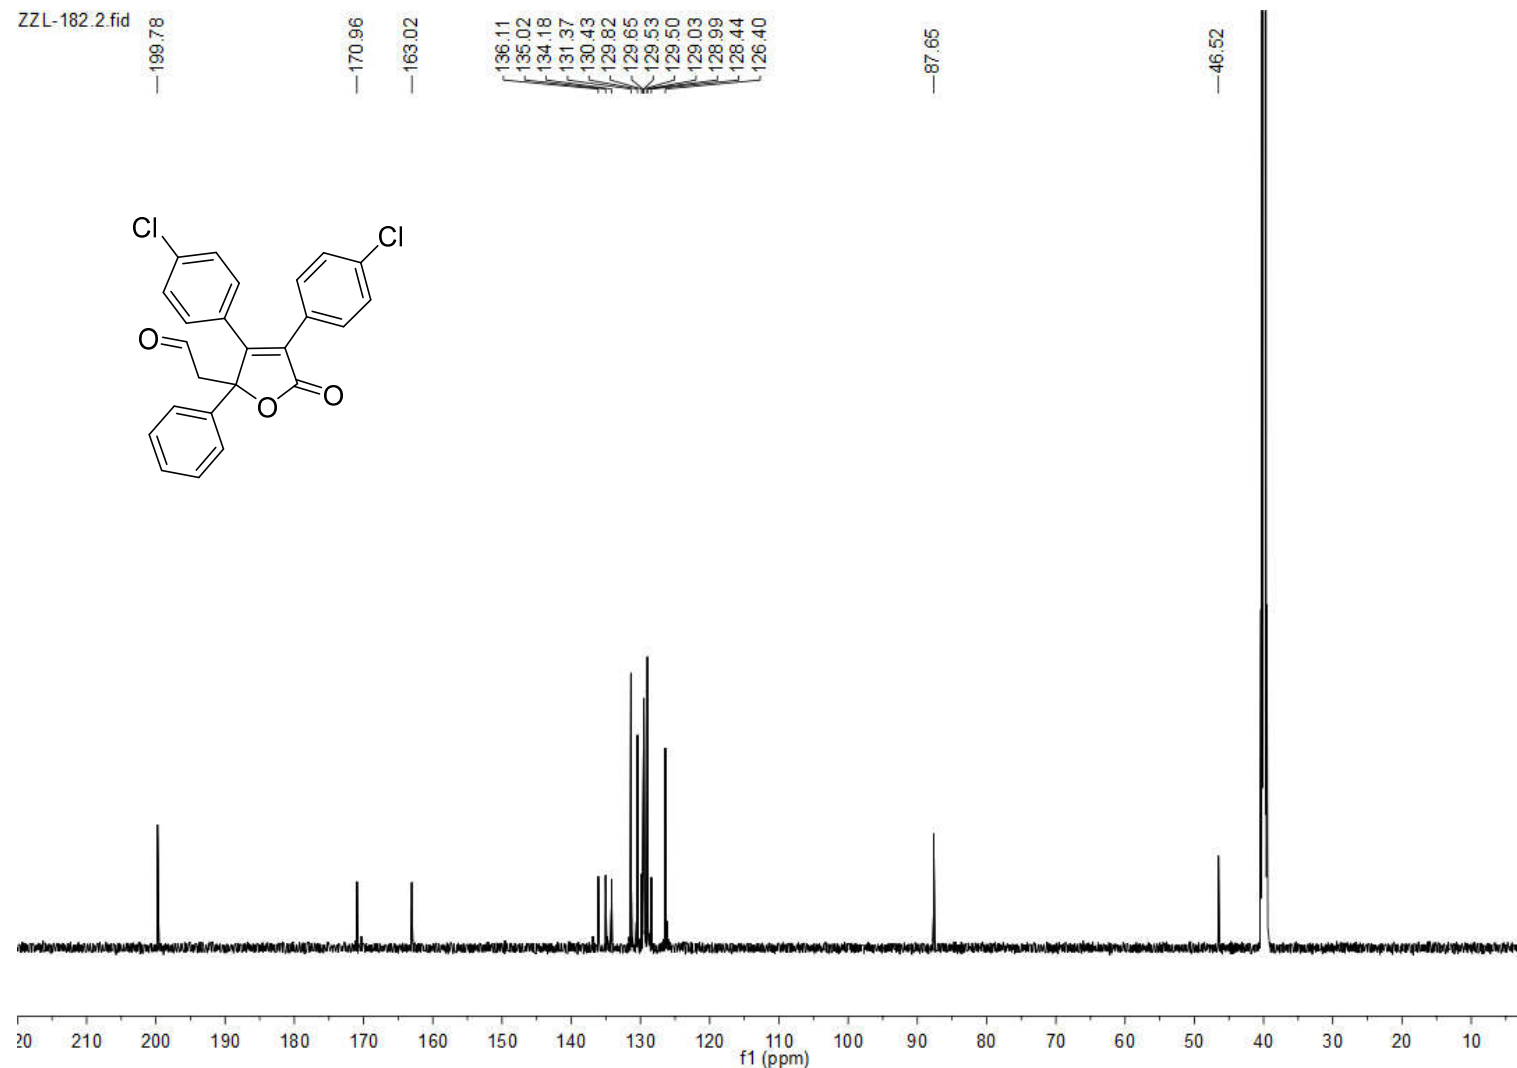

Figure S56.  $^{13}\text{C}$  NMR (150 MHz,  $\text{DMSO-}d_6$ ) spectra of compound **3y**

ZZL-189.3.fid

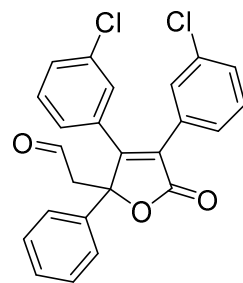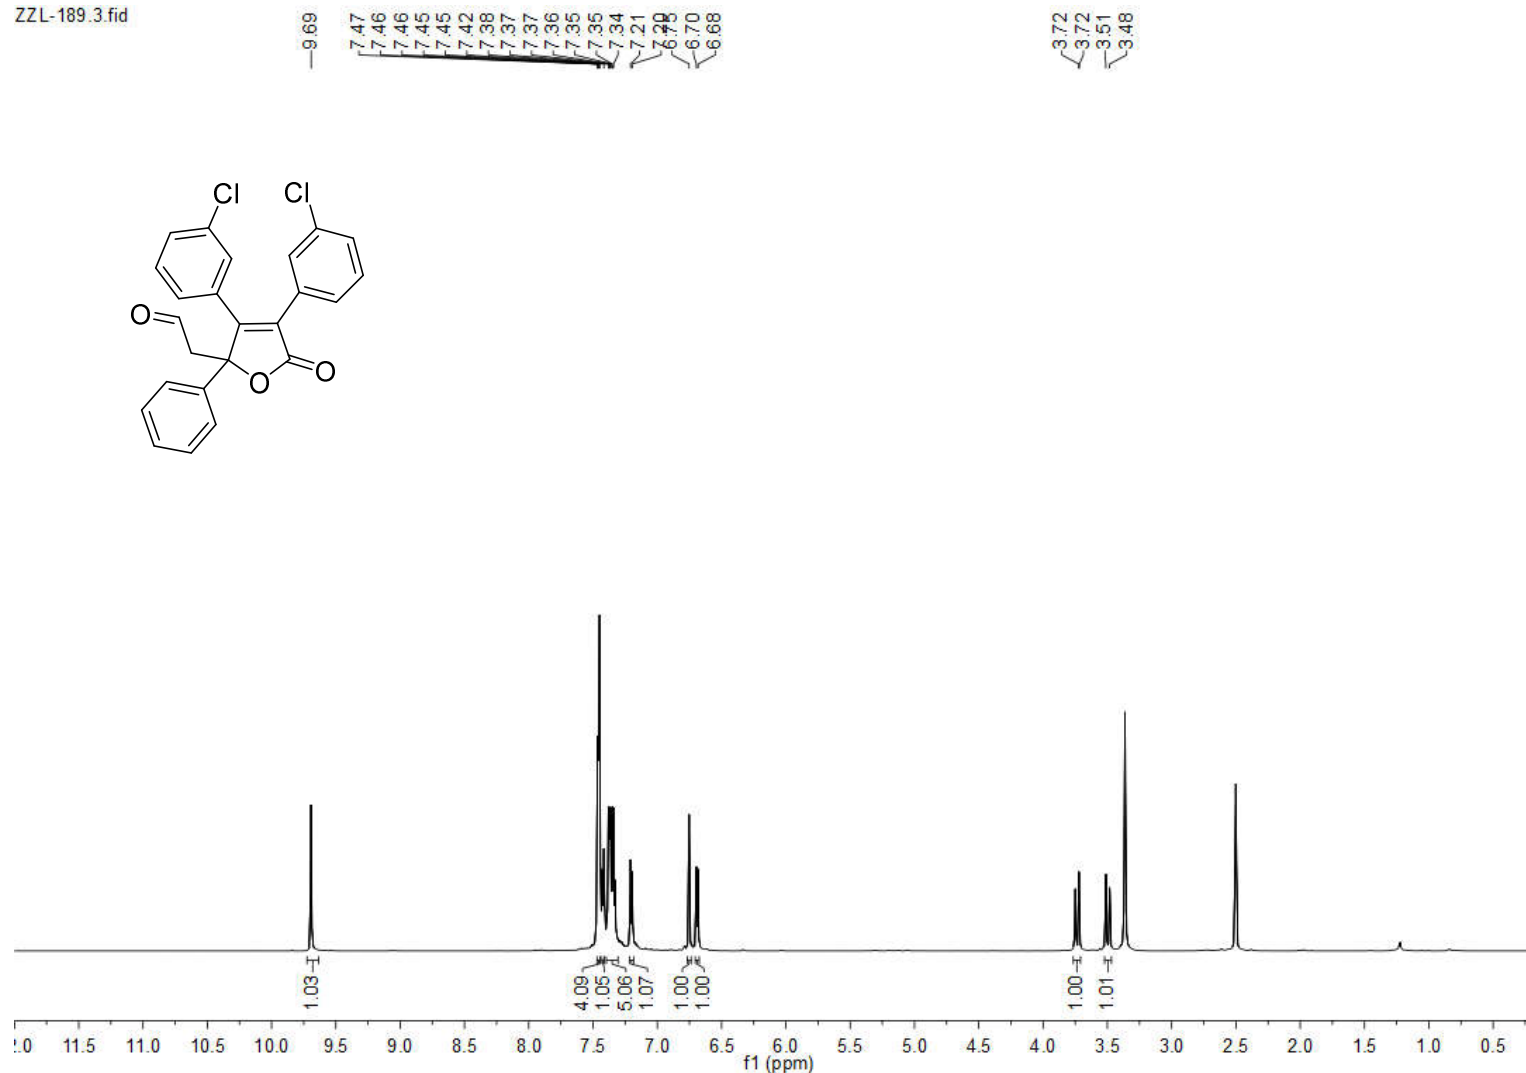

Figure S57.  $^1\text{H}$  NMR (600 MHz,  $\text{DMSO-}d_6$ ) spectra of compound 3z

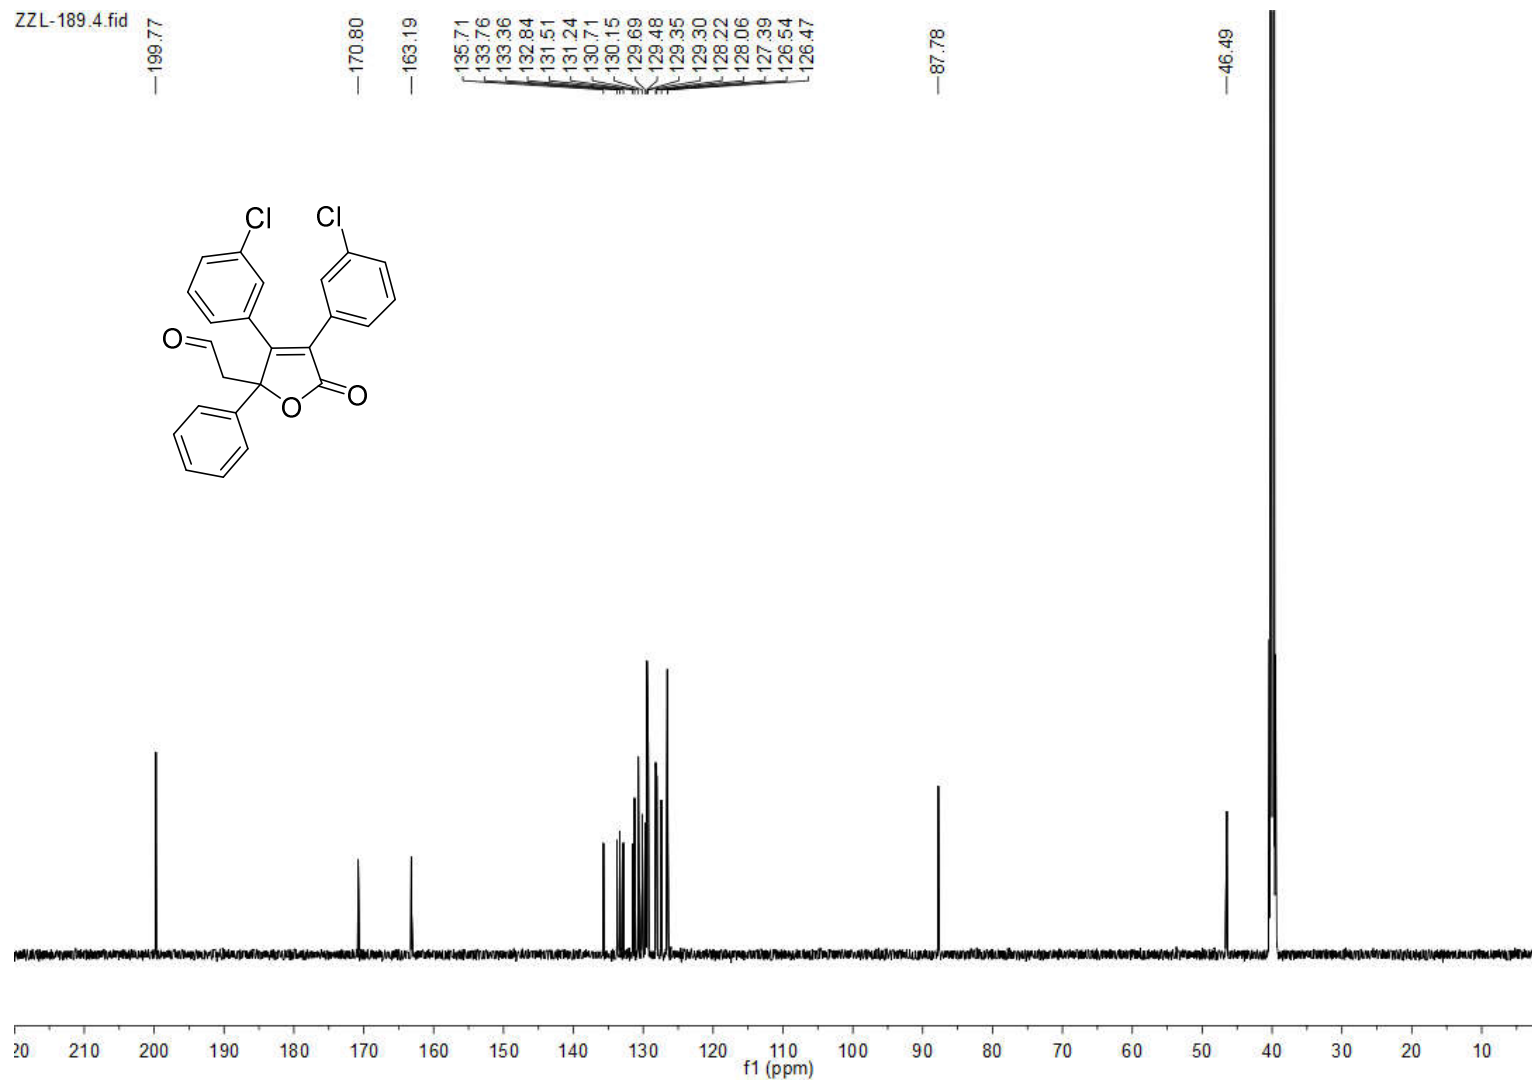

Figure S58.  $^{13}\text{C}$  NMR (150 MHz,  $\text{DMSO}-d_6$ ) spectra of compound 3z

ZZL-195.1.fid

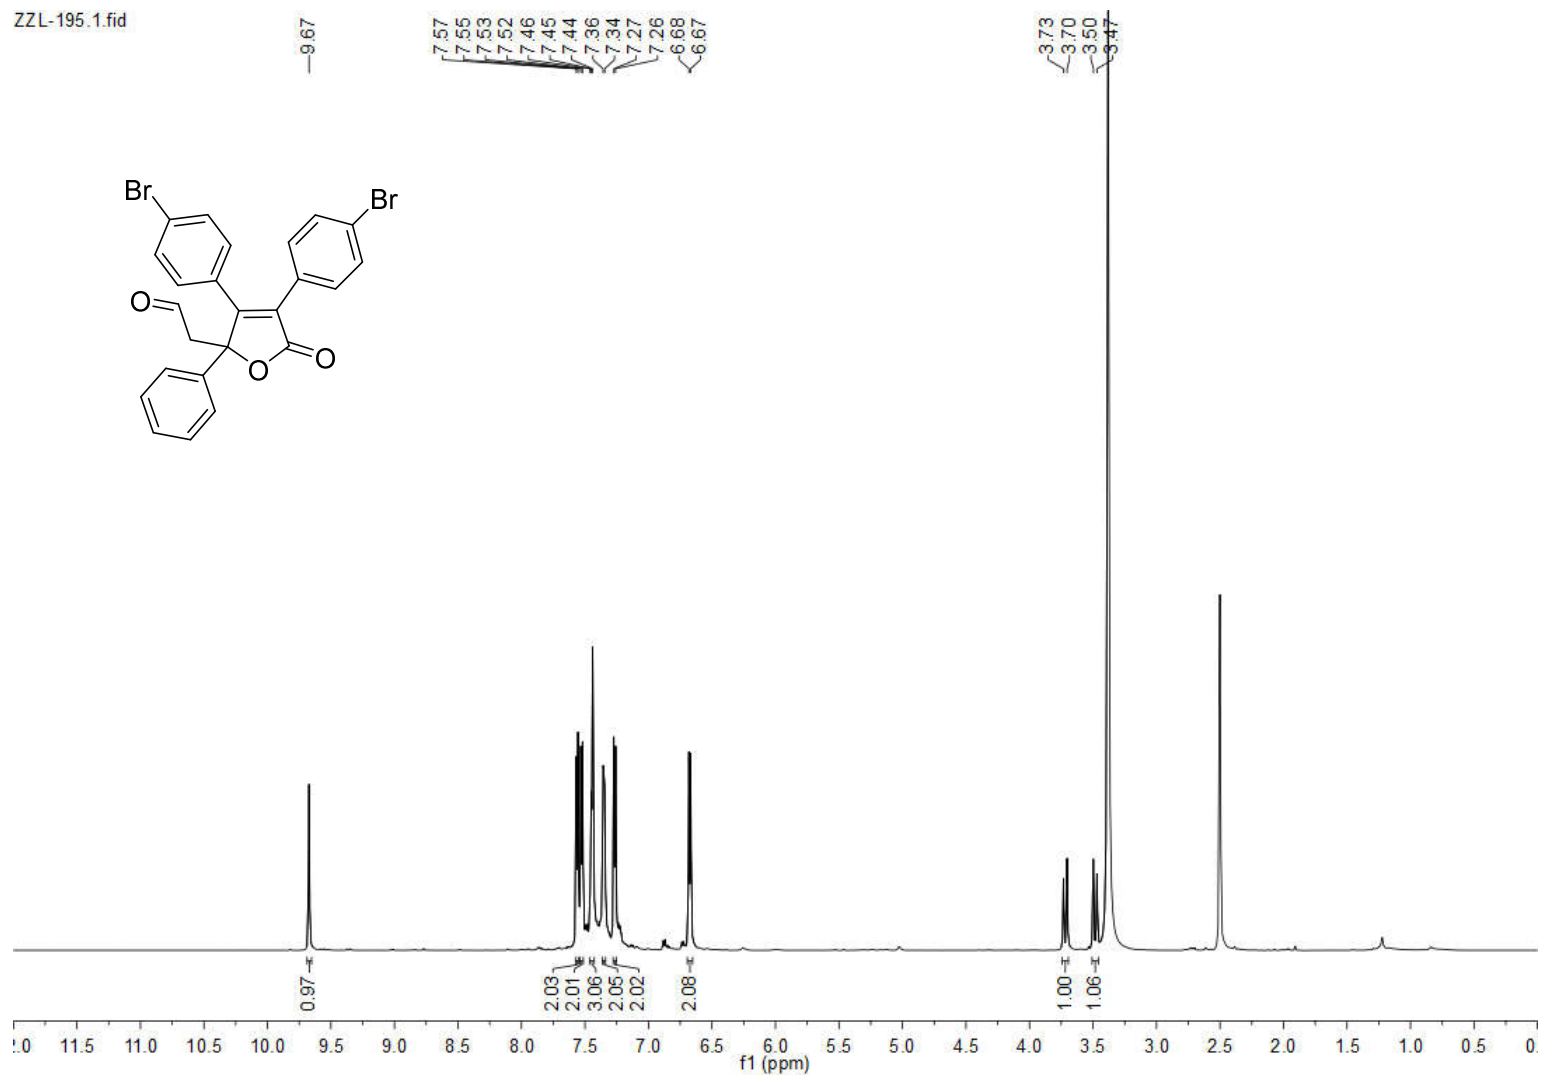

Figure S59. <sup>1</sup>H NMR (600 MHz, DMSO-d<sub>6</sub>) spectra of compound 3a'



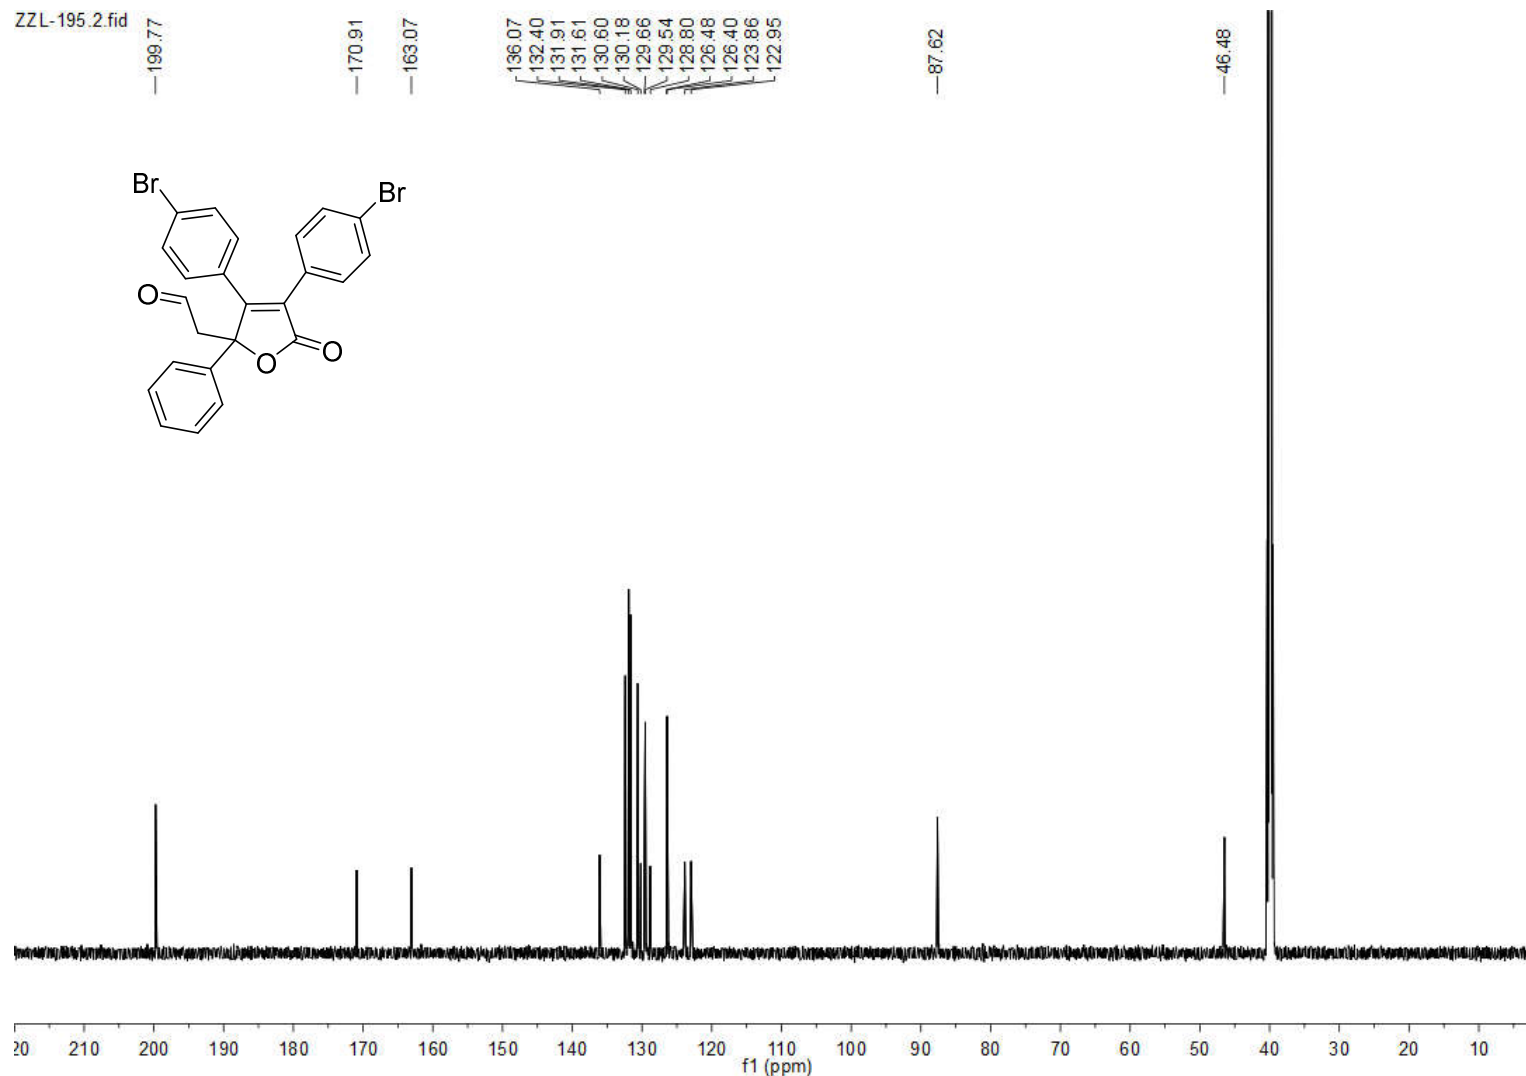

Figure S60.  $^{13}\text{C}$  NMR (150 MHz,  $\text{DMSO}-d_6$ ) spectra of compound **3a'**

ZZL-193.1.fid

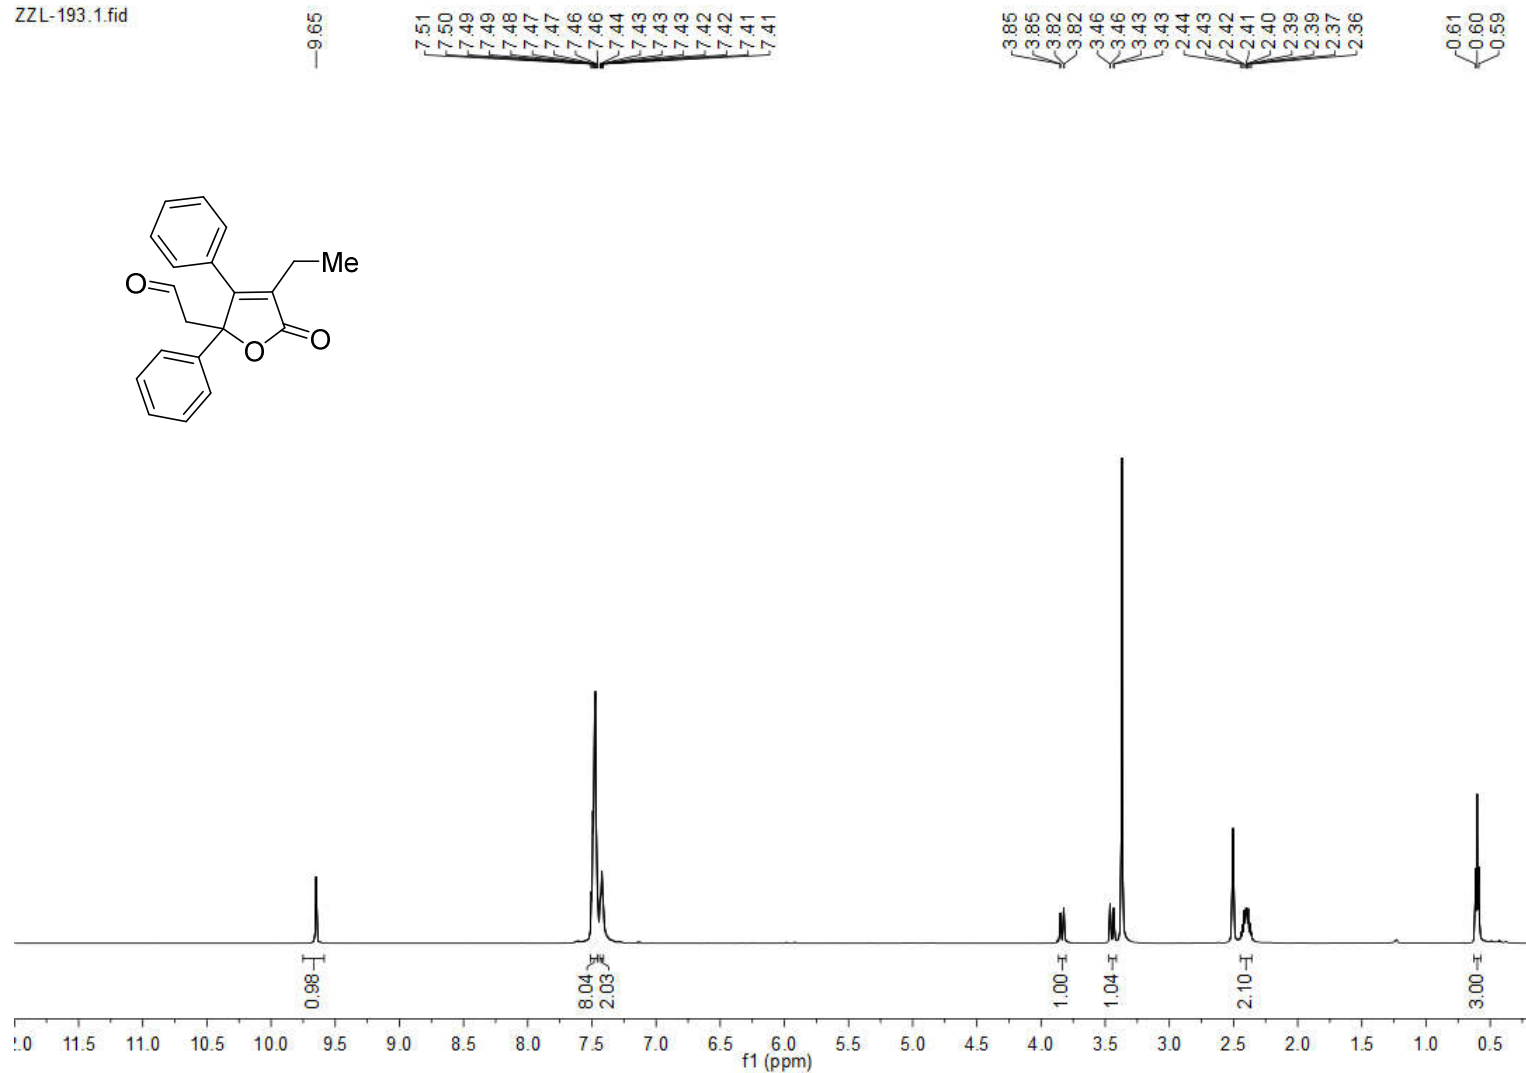

Figure S61.  $^1\text{H}$  NMR (600 MHz,  $\text{DMSO-}d_6$ ) spectra of compound **3b'**

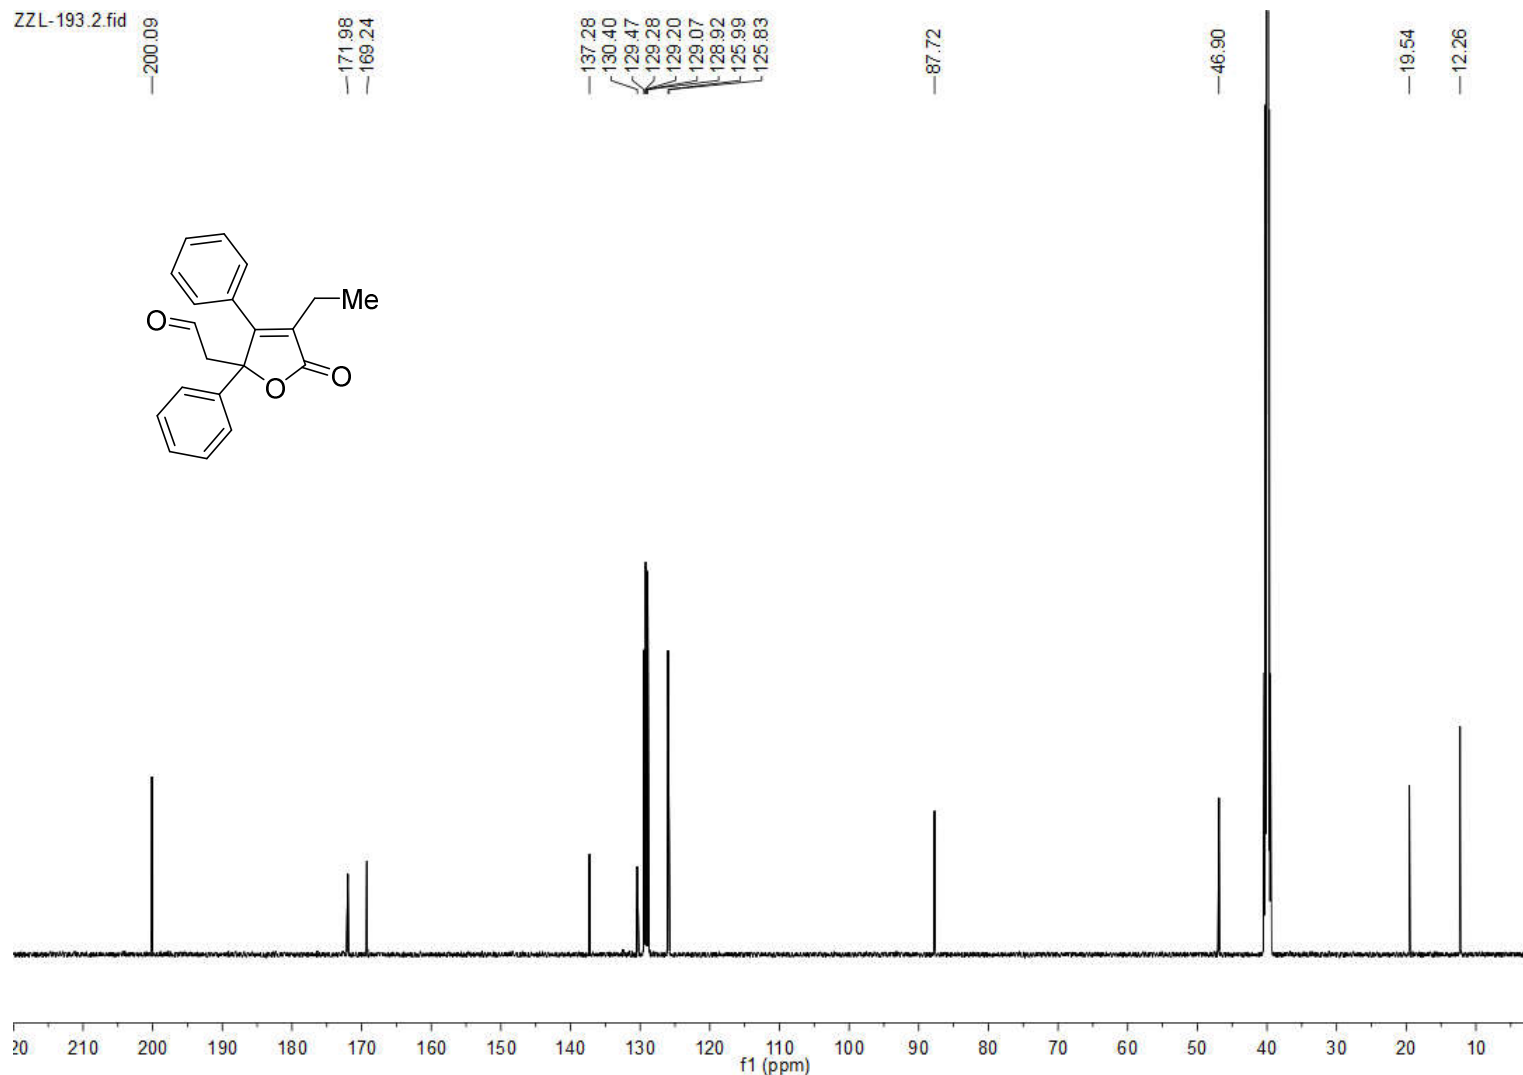

**Figure S62.**  $^{13}\text{C}$  NMR (150 MHz,  $\text{DMSO-}d_6$ ) spectra of compound **3b'**

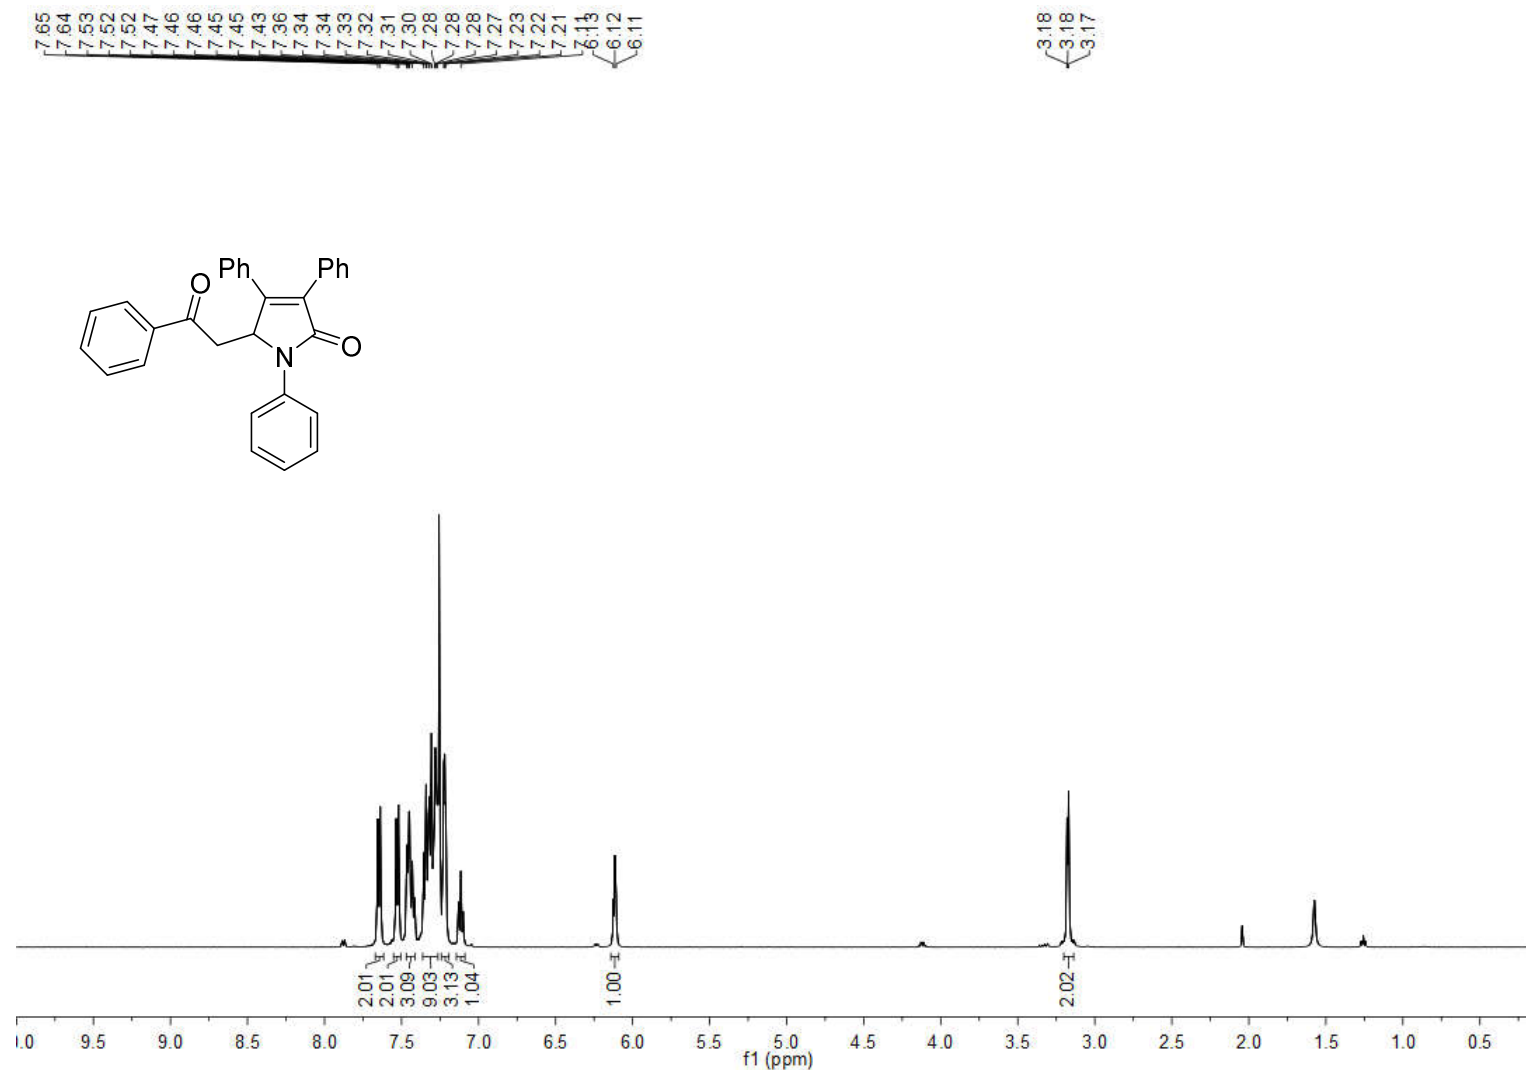

Figure S63. <sup>1</sup>H NMR (500 MHz, CDCl<sub>3</sub>) spectra of compound 5a

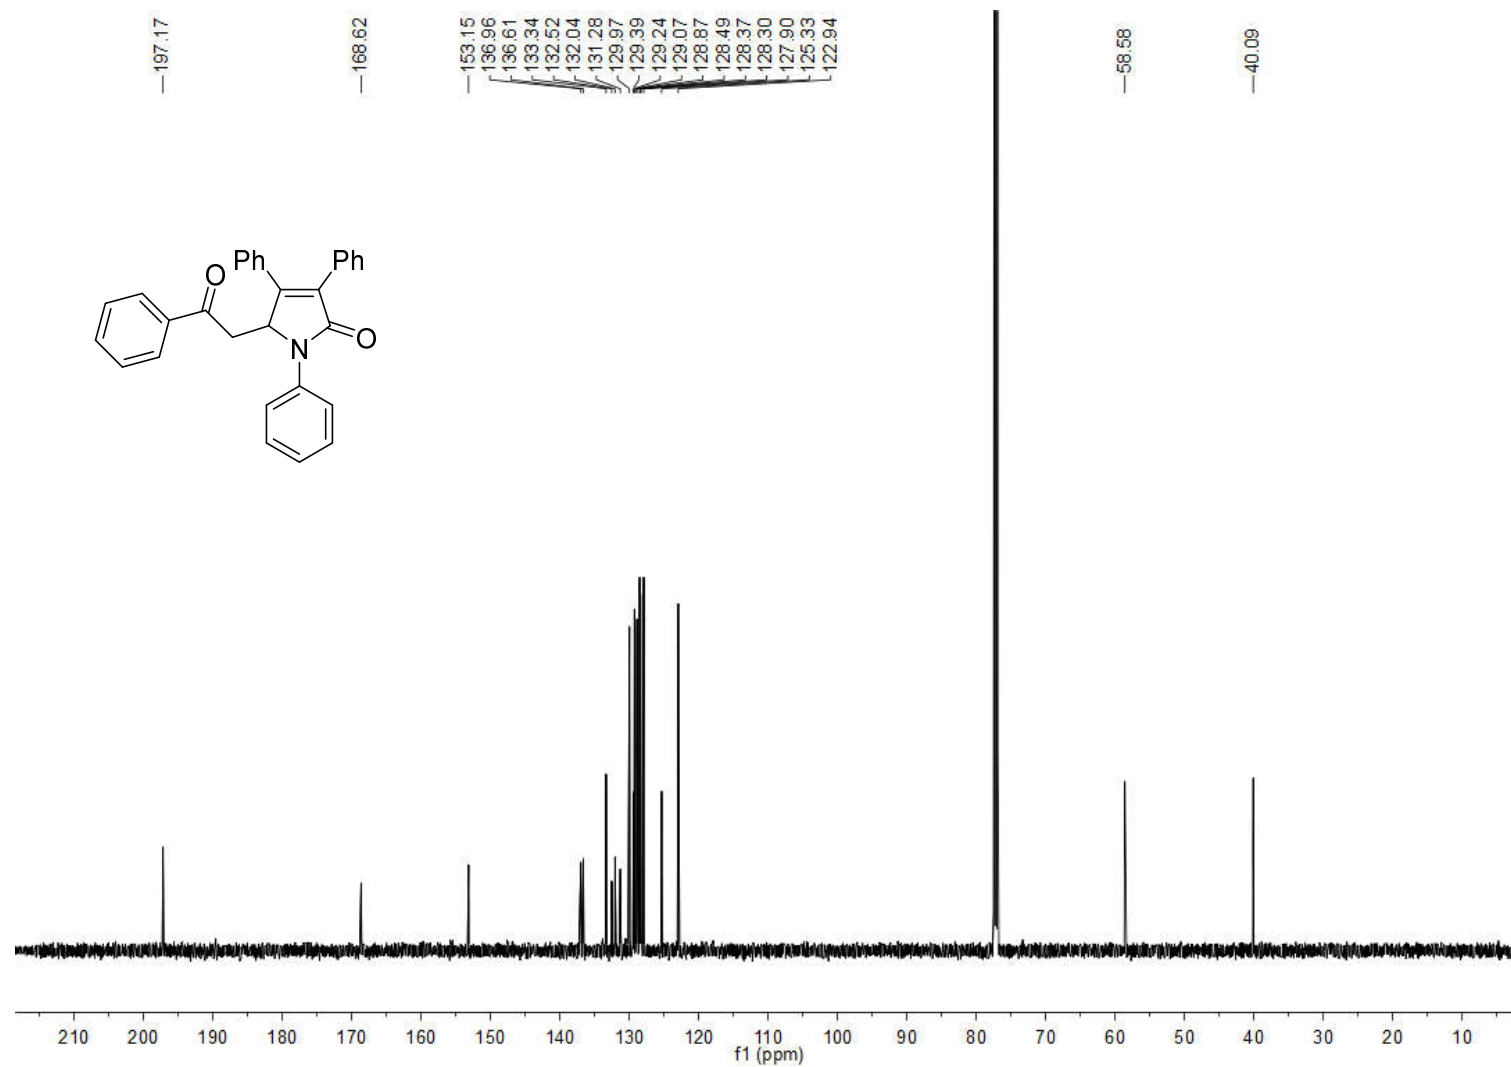

Figure S64. <sup>13</sup>C NMR (125 MHz, CDCl<sub>3</sub>) spectra of compound 5a

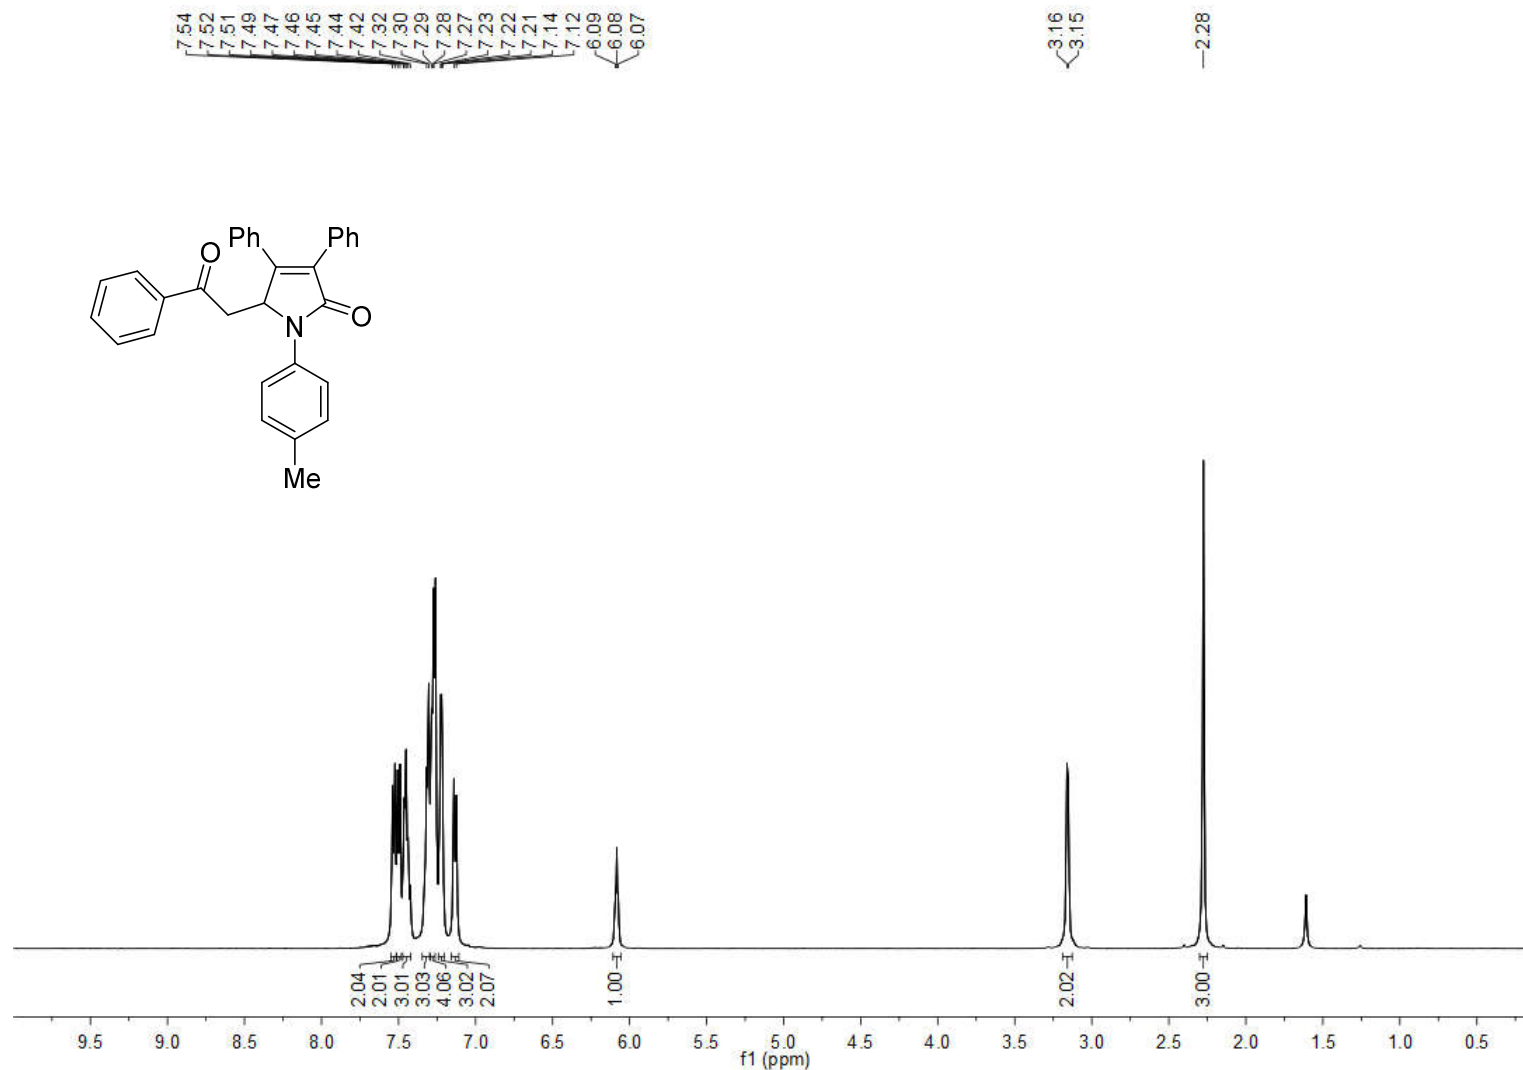

**Figure S65.**  $^1\text{H NMR}$  (500 MHz,  $\text{CDCl}_3$ ) spectra of compound **5b**

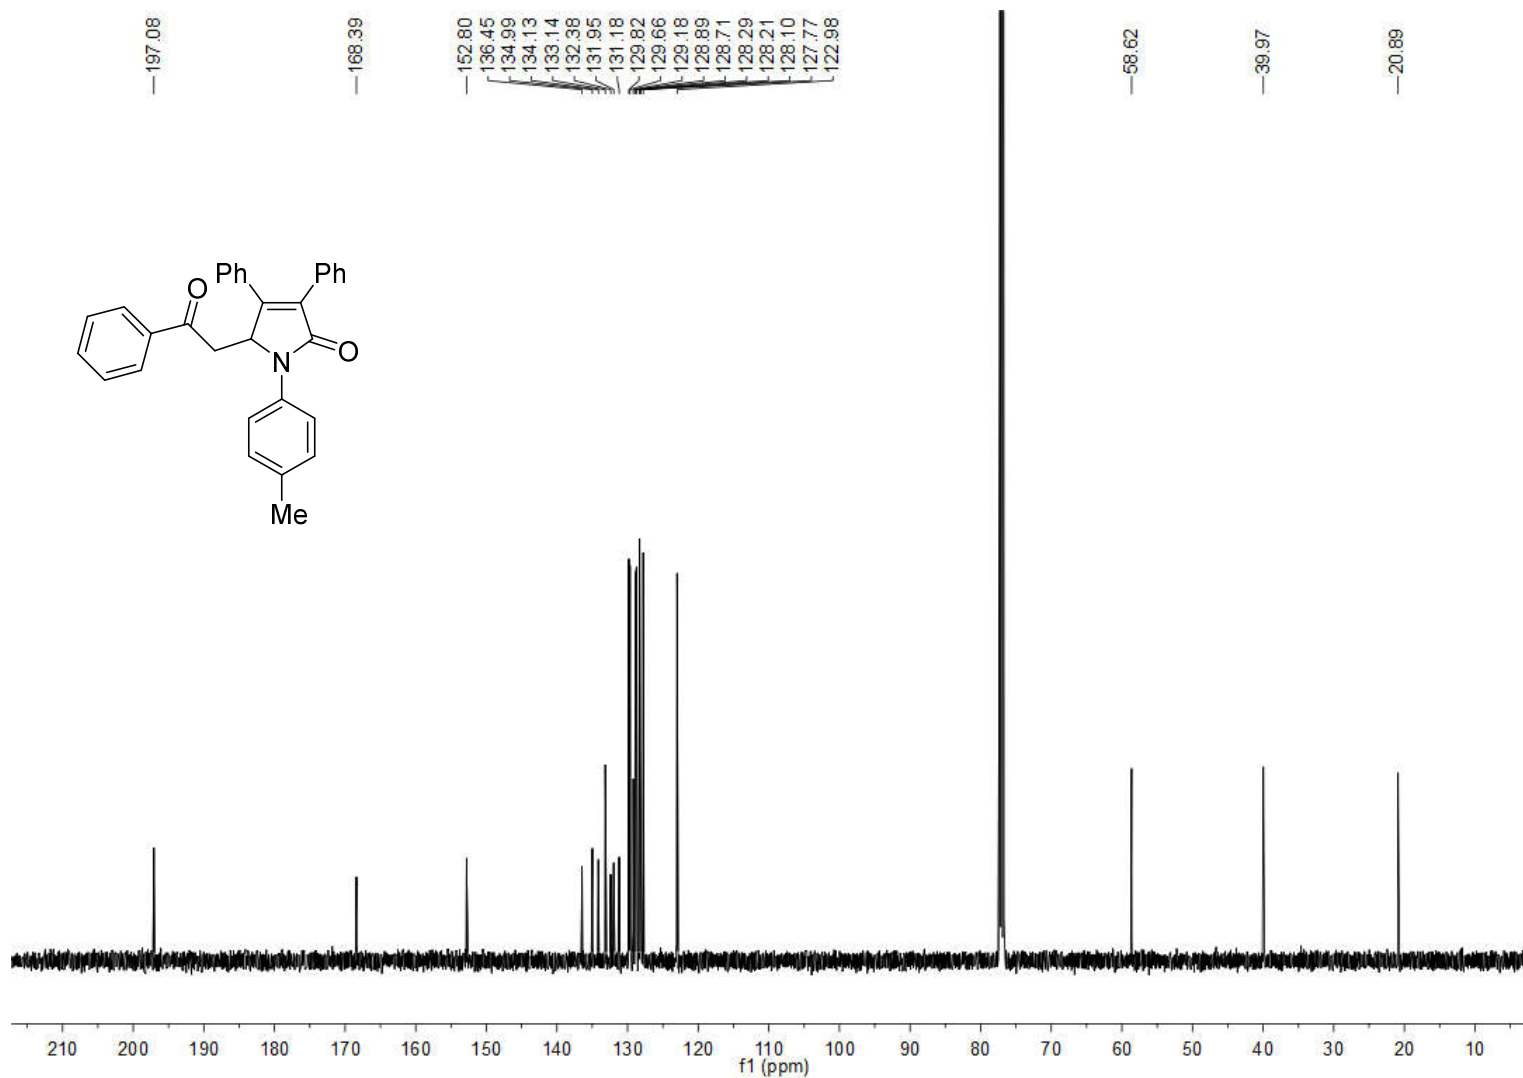

Figure S66. <sup>13</sup>C NMR (125 MHz, CDCl<sub>3</sub>) spectra of compound **5b**

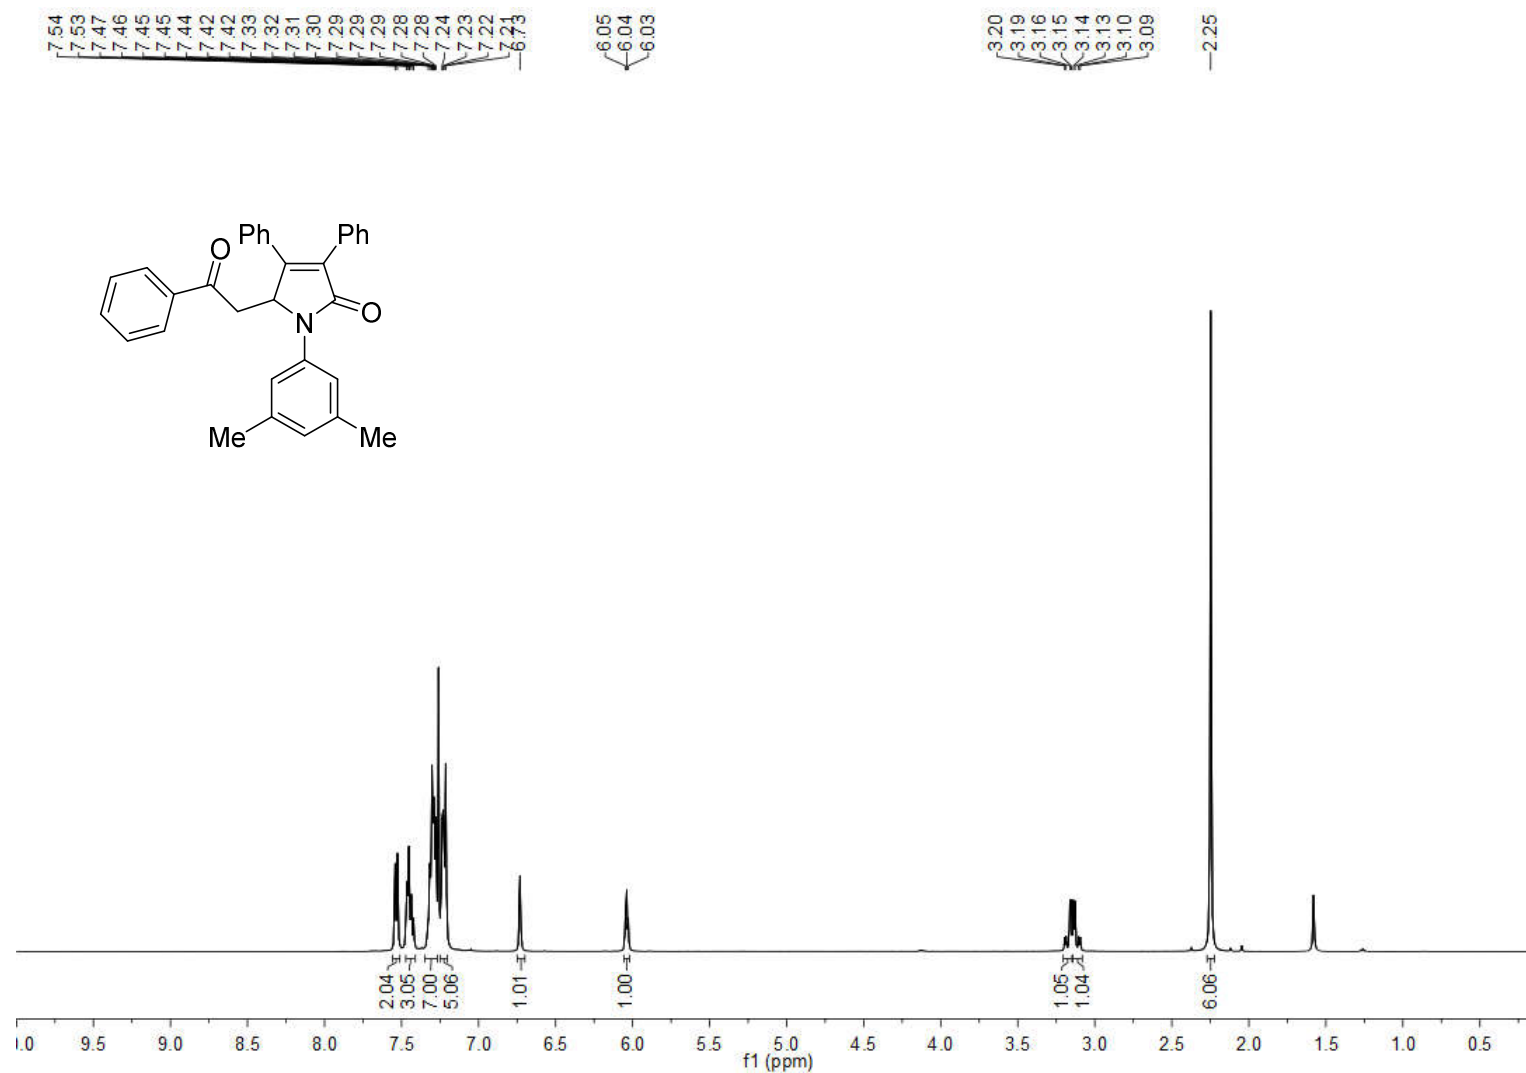

**Figure S67.** <sup>1</sup>H NMR (500 MHz, CDCl<sub>3</sub>) spectra of compound **5c**



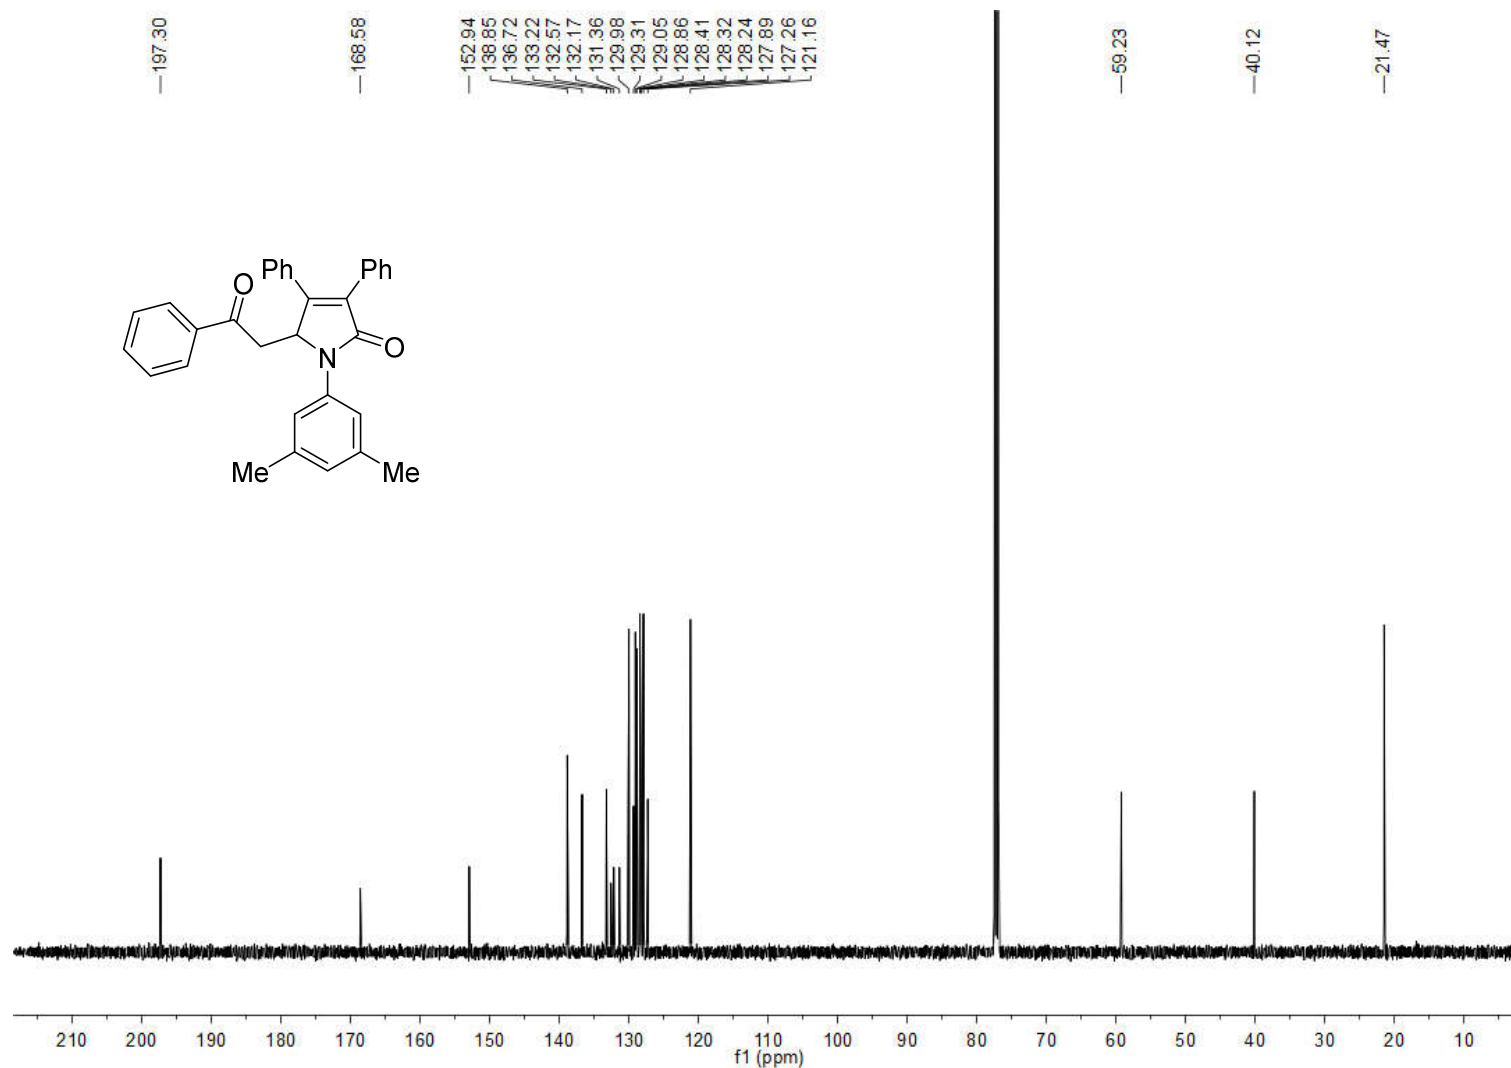

Figure S68.  $^{13}\text{C}$  NMR (125 MHz,  $\text{CDCl}_3$ ) spectra of compound 5c

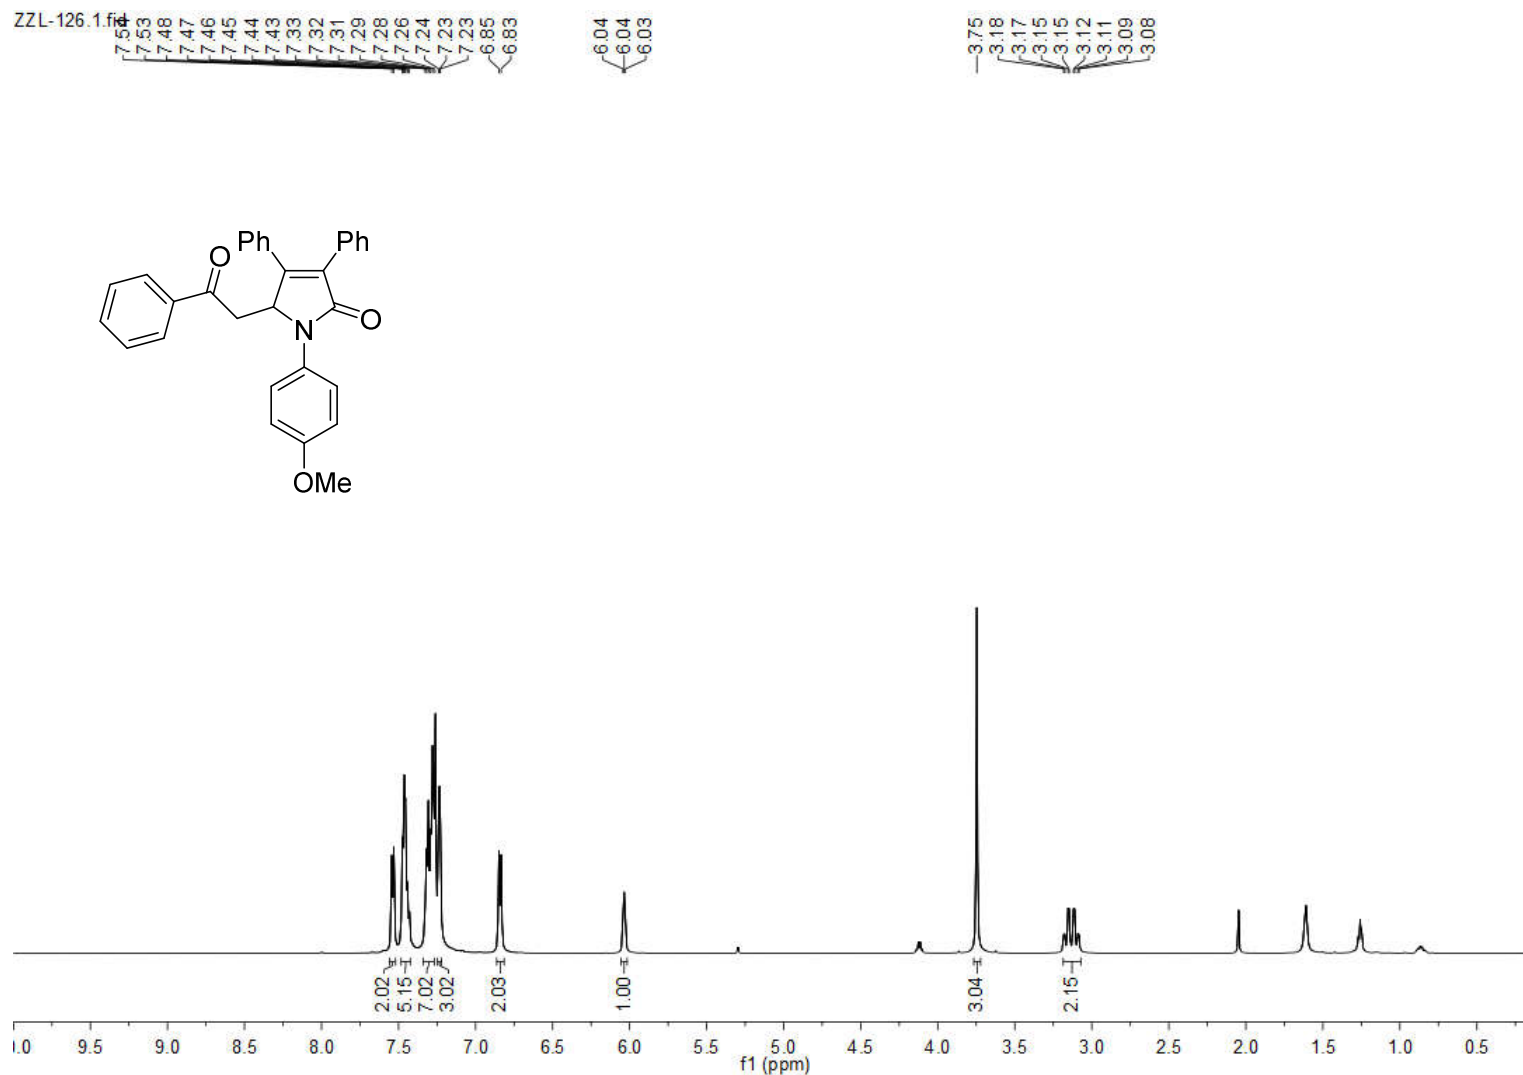

**Figure S69.**  $^1\text{H}$  NMR (600 MHz,  $\text{CDCl}_3$ ) spectra of compound **5d**

ZZL-126.2.fid

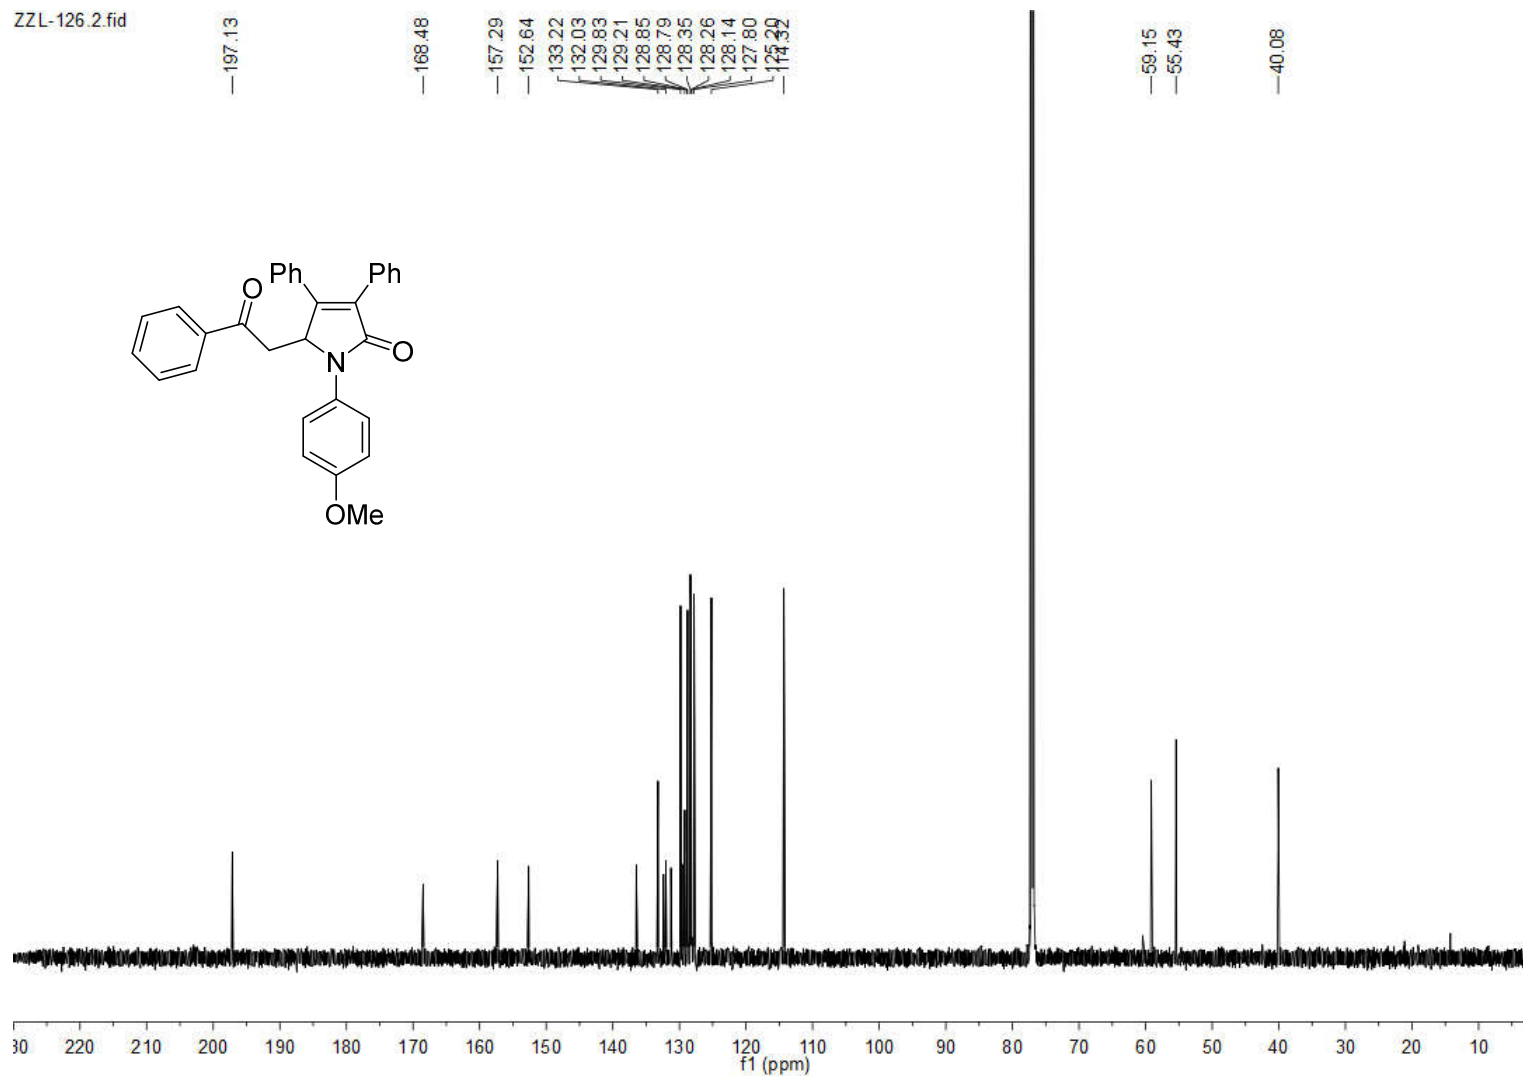

Figure S70.  $^{13}\text{C}$  NMR (150 MHz,  $\text{CDCl}_3$ ) spectra of compound 5d

ZZL-124.1.fid

7.68  
7.67  
7.55  
7.53  
7.47  
7.45  
7.44  
7.33  
7.32  
7.30  
7.29  
7.28  
7.28  
7.27  
7.25  
7.24  
7.24  
7.19  
7.17  
6.11  
6.10  
6.10

3.21  
3.20  
3.18  
3.17  
3.16  
3.16  
3.14  
3.13

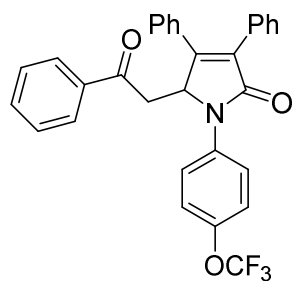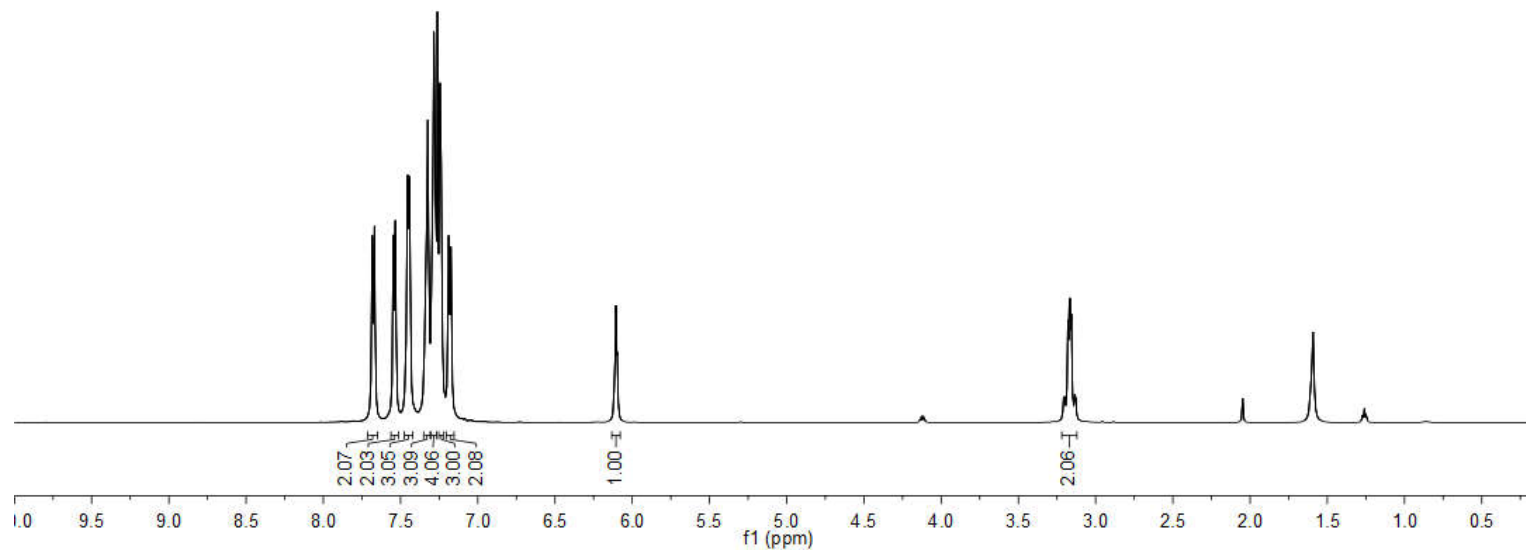

Figure S71. <sup>1</sup>H NMR (600 MHz, CDCl<sub>3</sub>) spectra of compound 5e

ZZL-124.2.fid

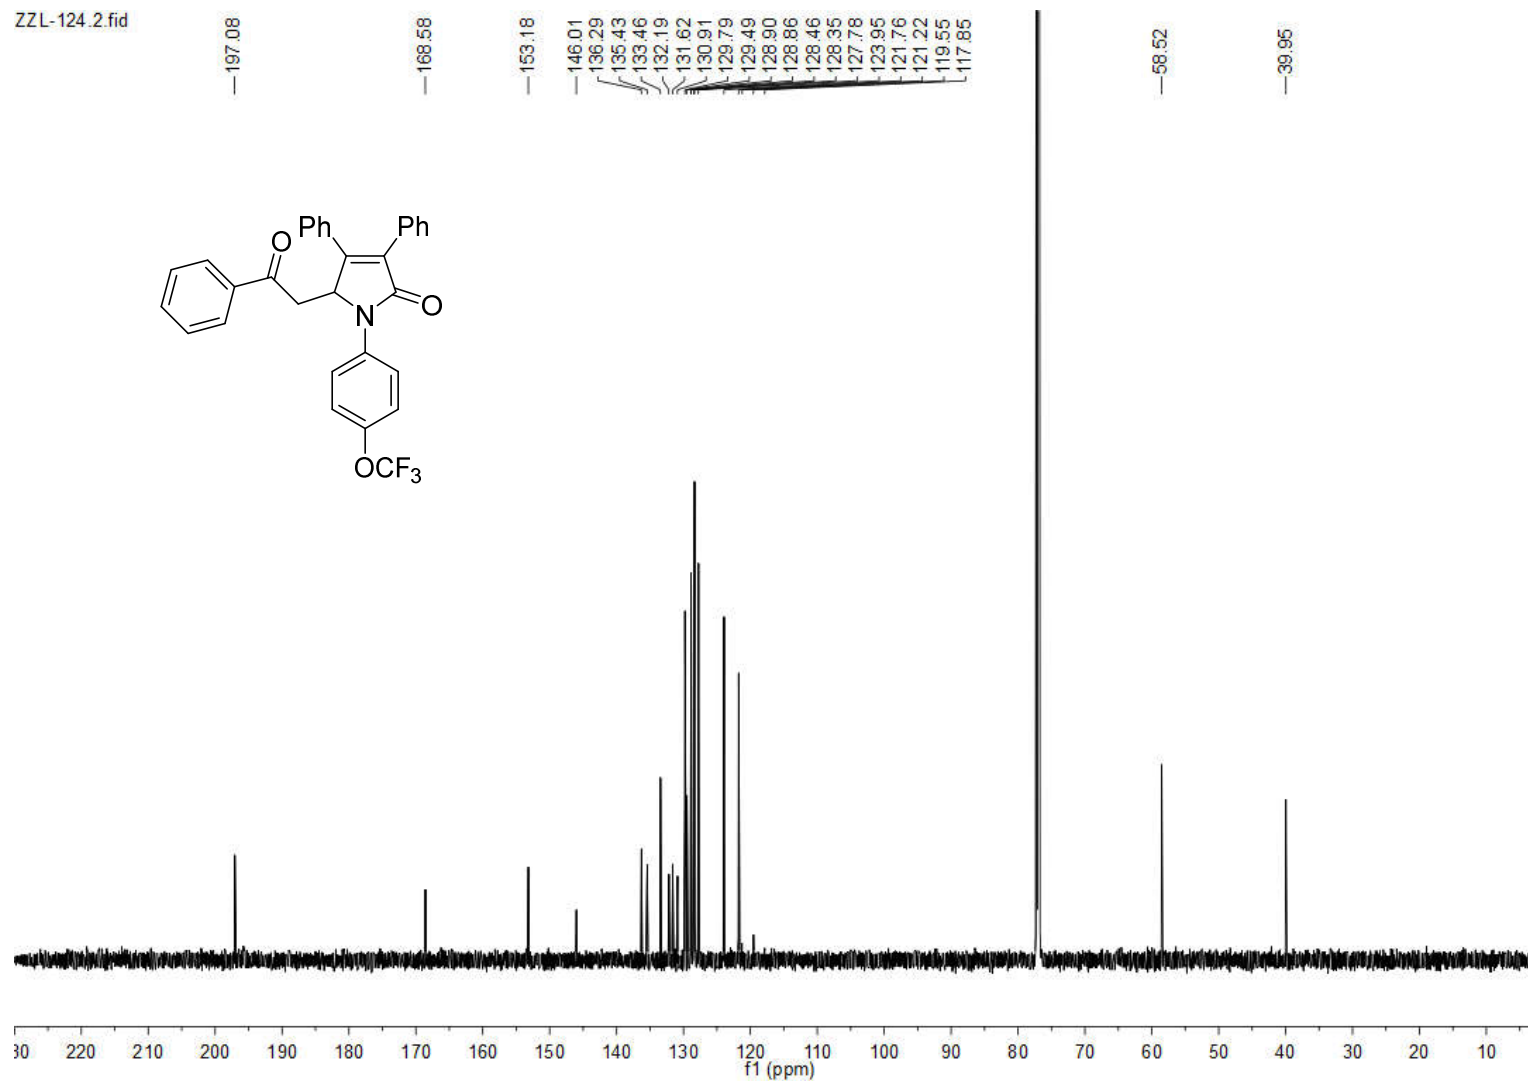

Figure S72. <sup>13</sup>C NMR (150 MHz, CDCl<sub>3</sub>) spectra of compound 5e

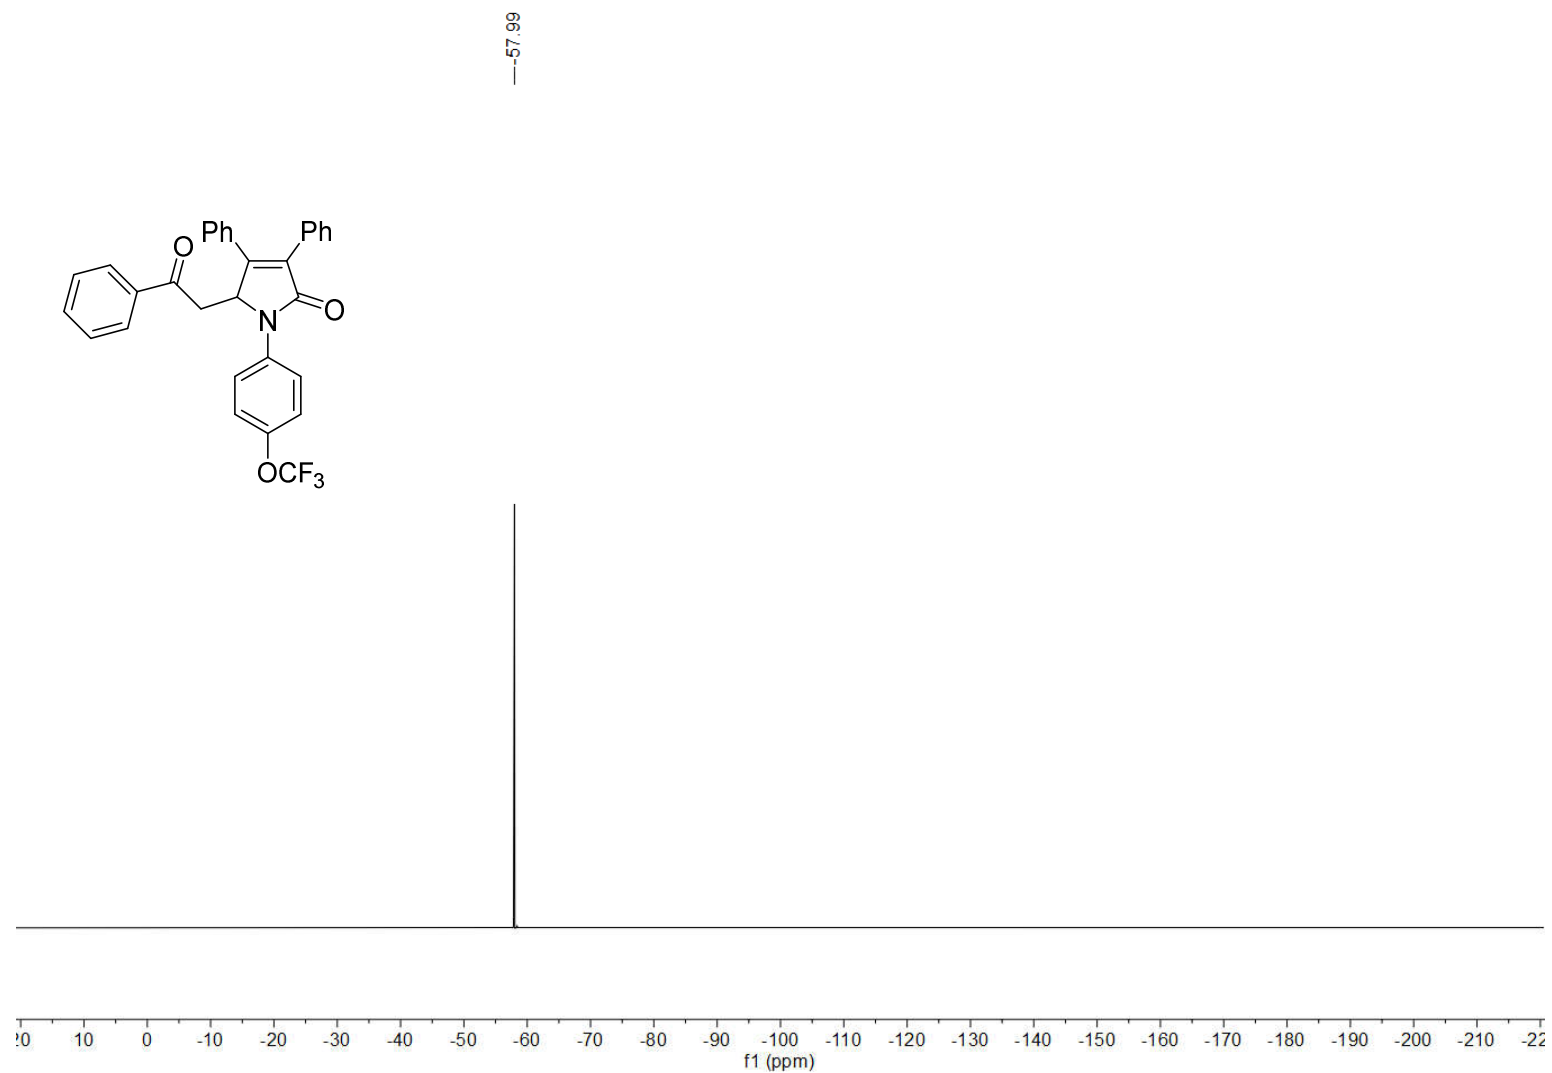

**Figure S73.**  $^{19}\text{F}$  NMR (470 MHz,  $\text{CDCl}_3$ ) spectra of compound **5e**

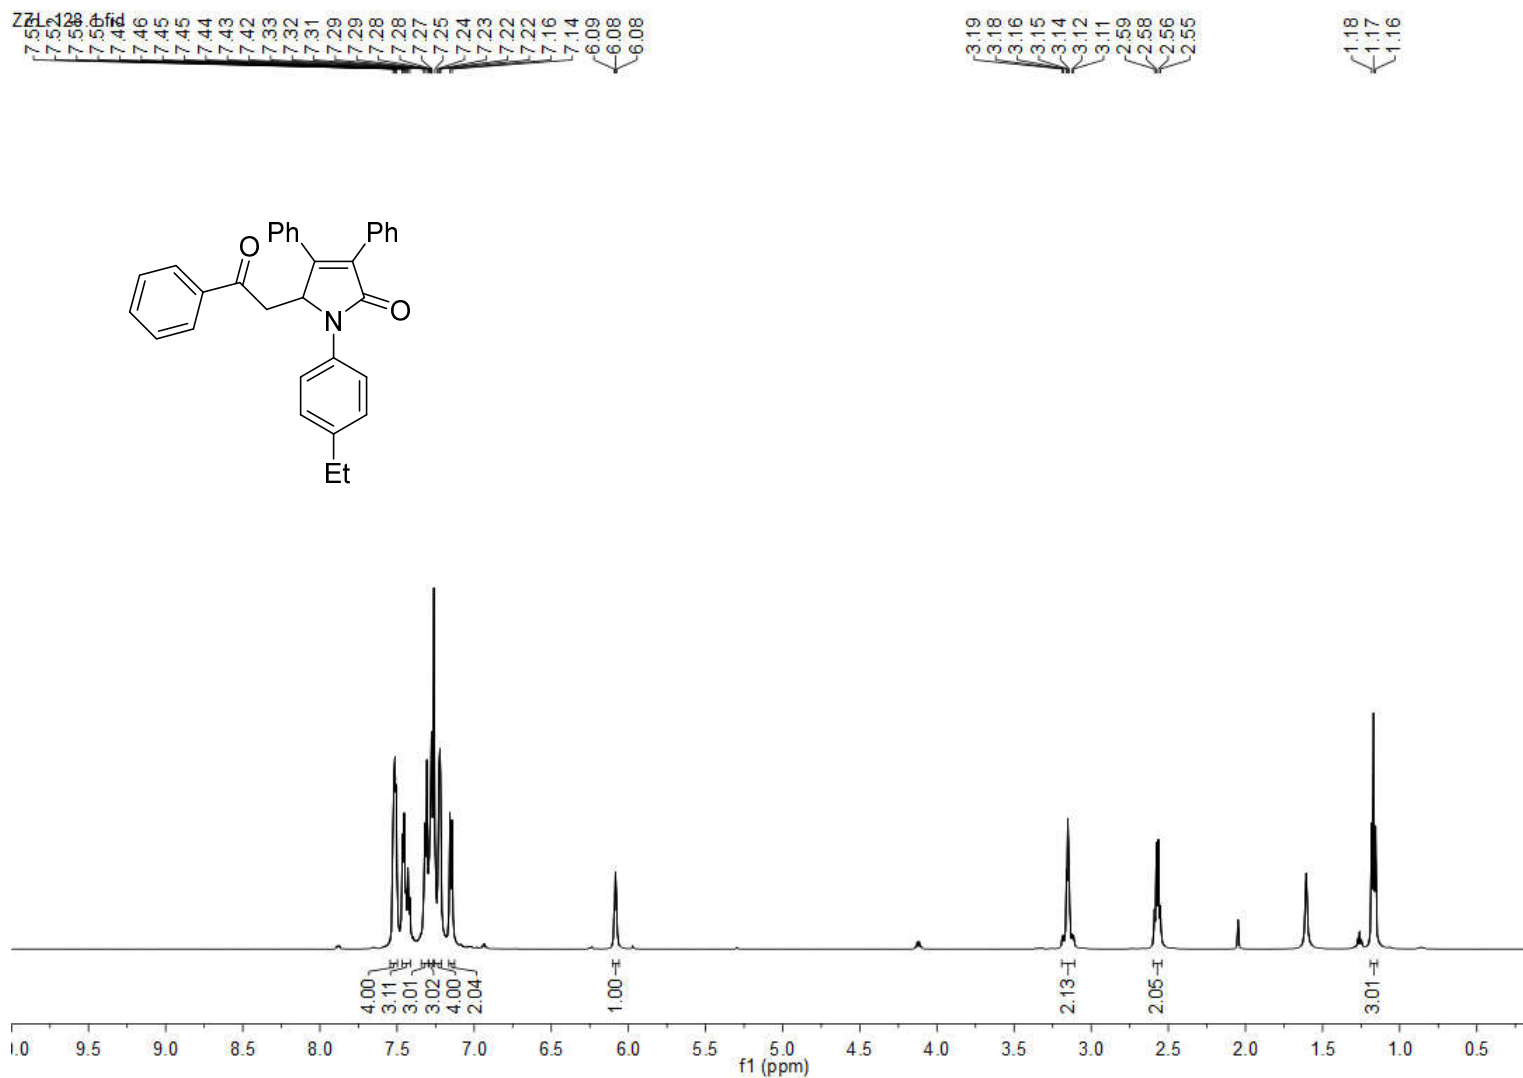

**Figure S74.** <sup>1</sup>H NMR (600 MHz, CDCl<sub>3</sub>) spectra of compound **5f**

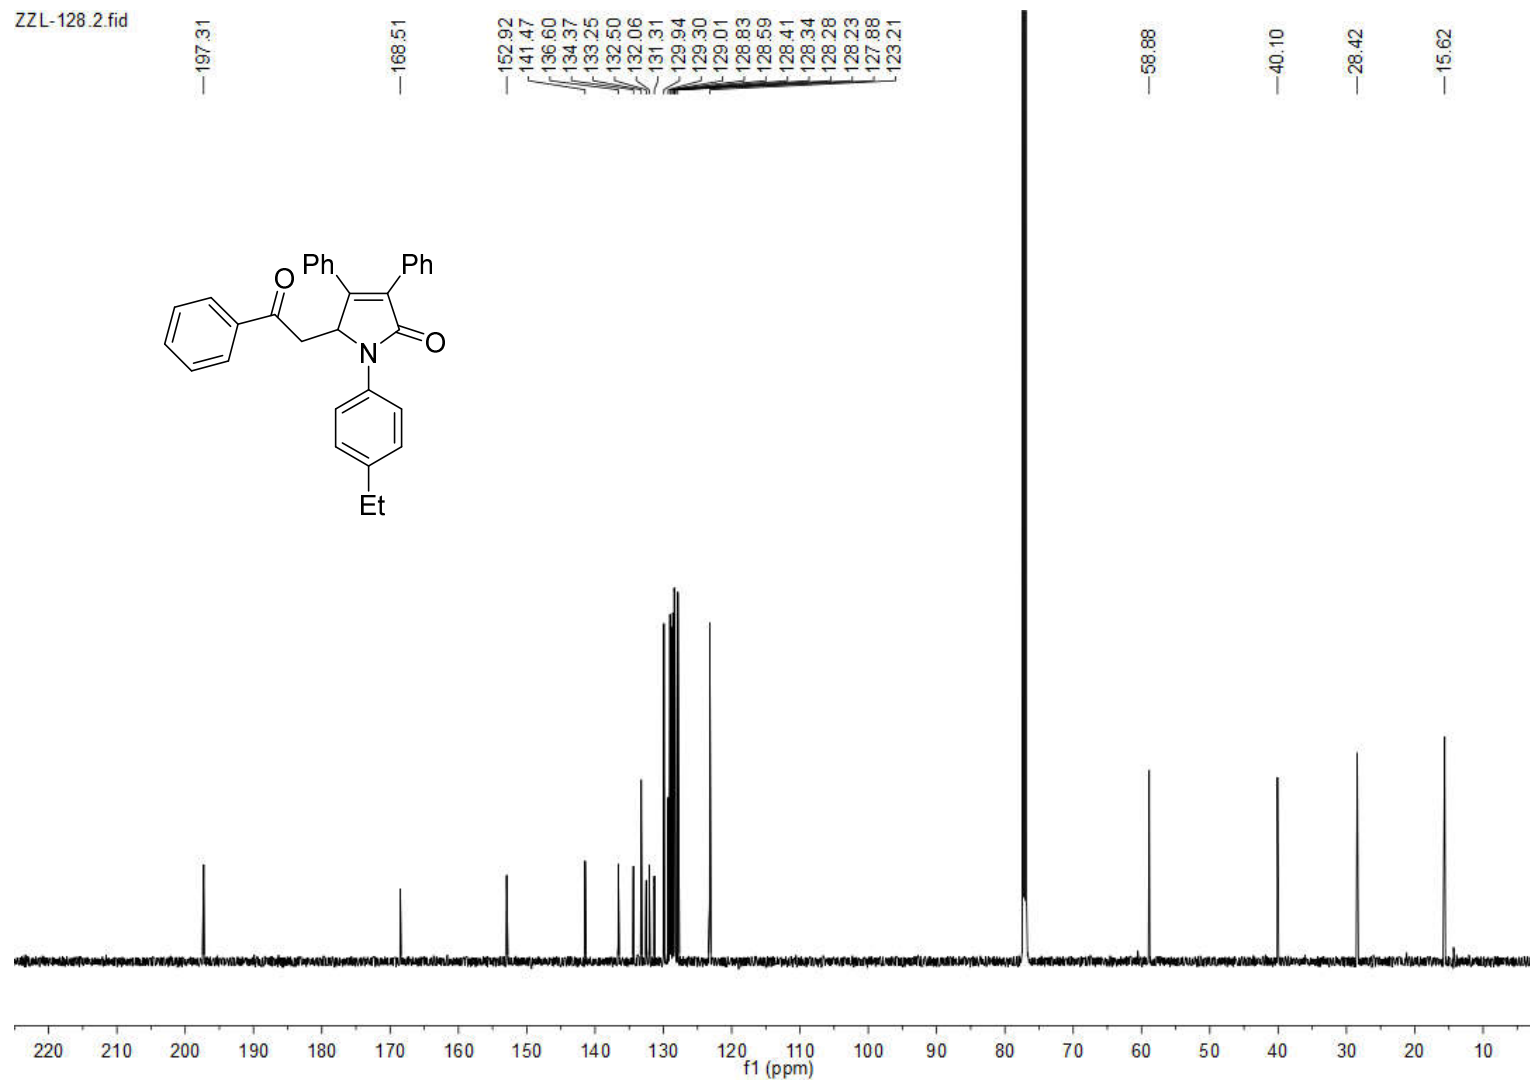

**Figure S75.**  $^{13}\text{C}$  NMR (150 MHz,  $\text{CDCl}_3$ ) spectra of compound **5f**



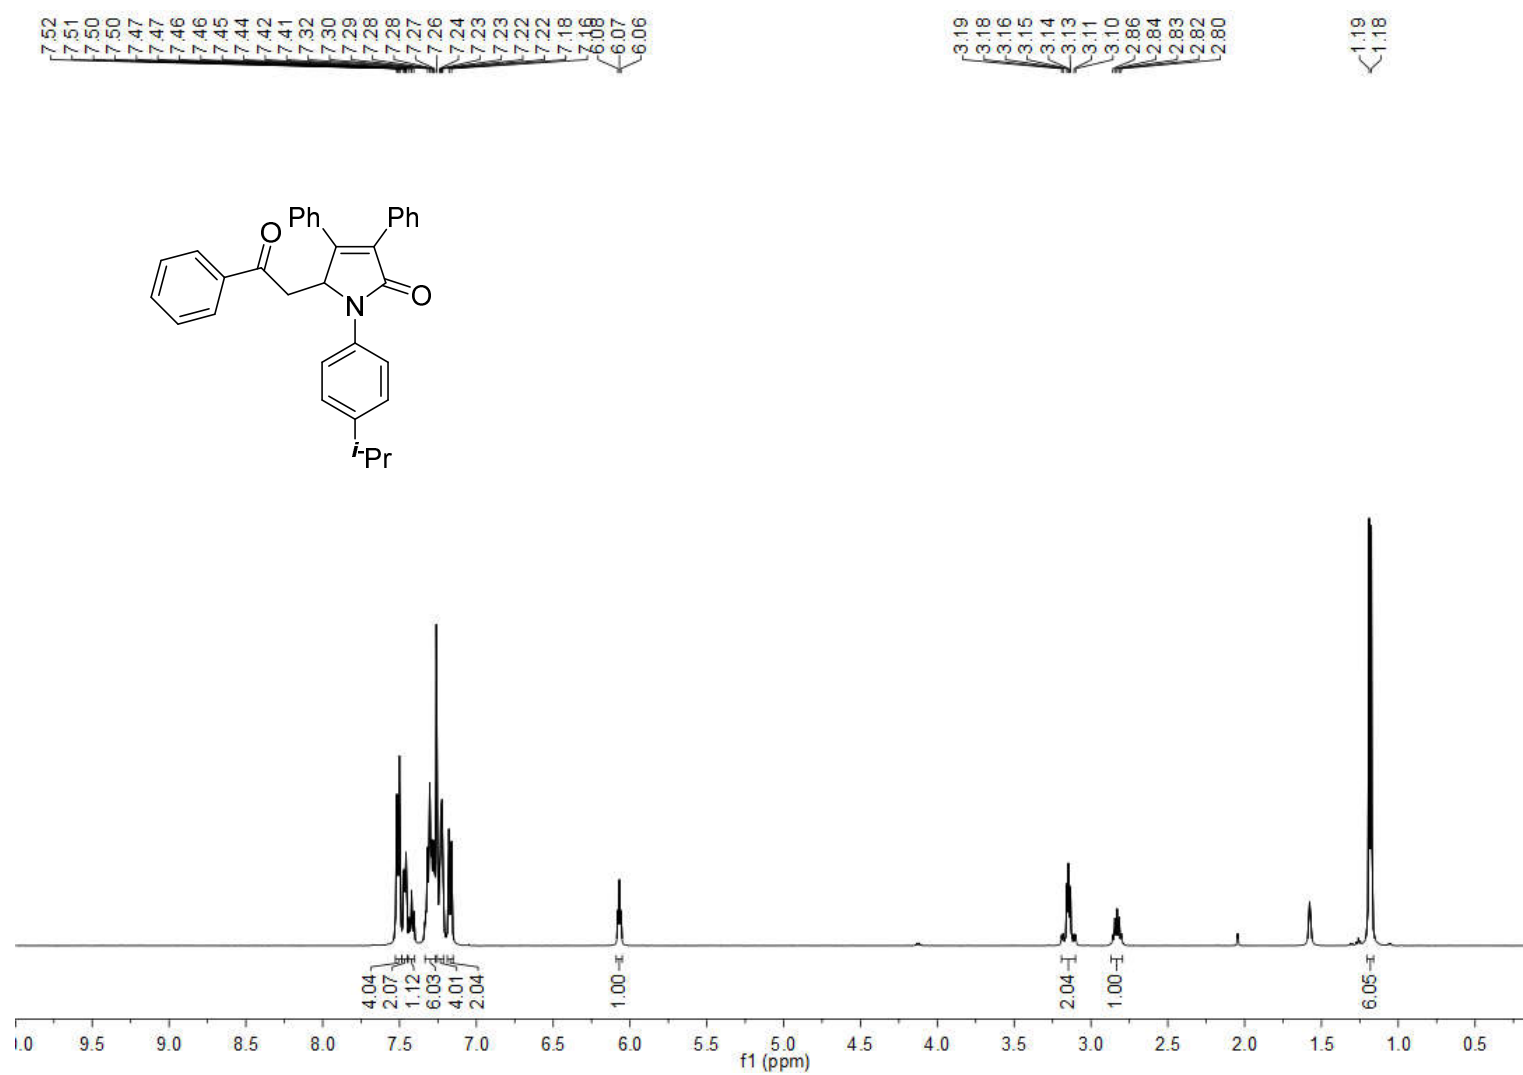

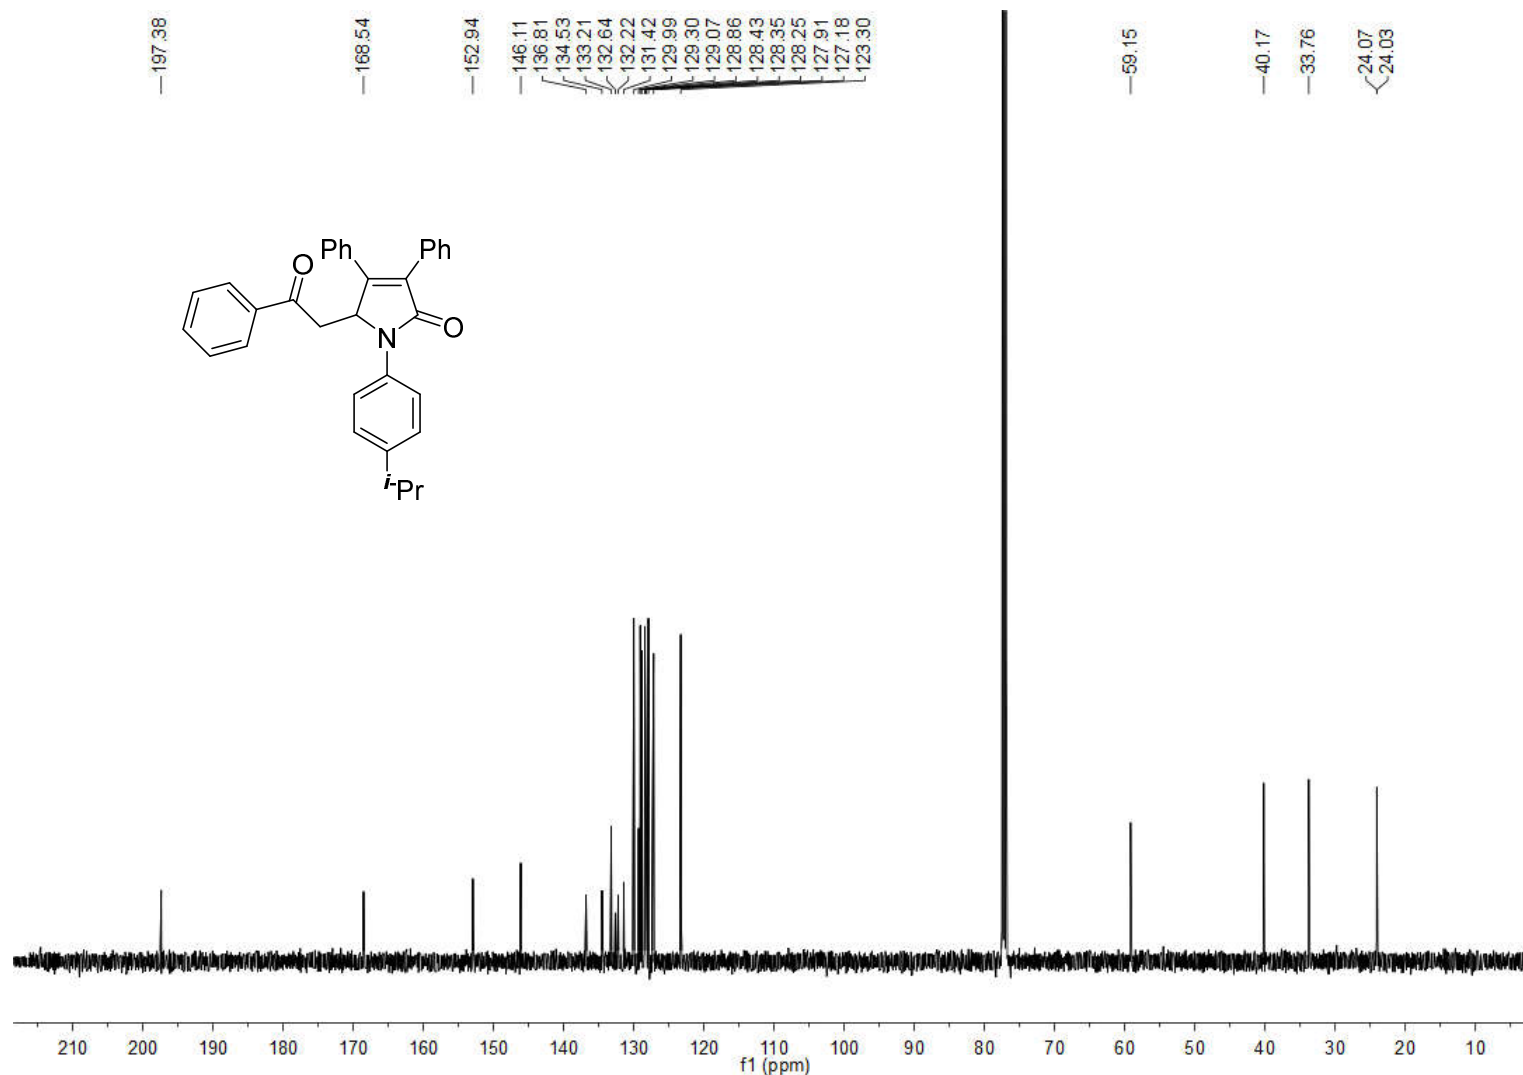

Figure S77. <sup>13</sup>C NMR (125 MHz, CDCl<sub>3</sub>) spectra of compound 5g

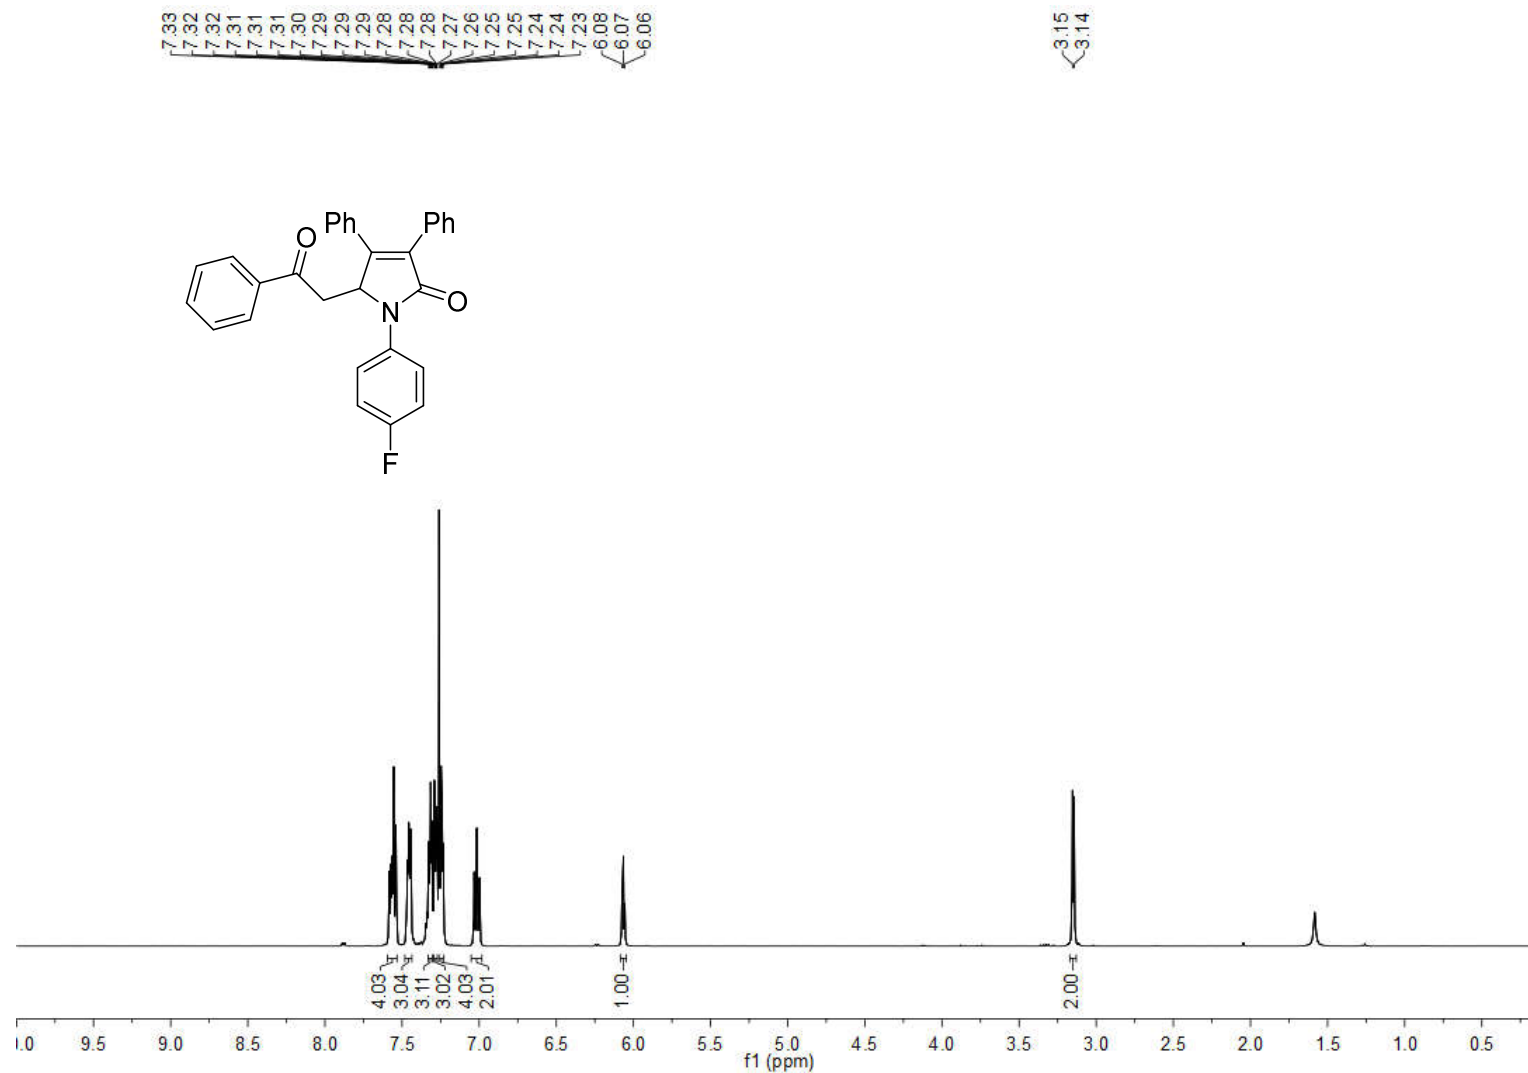

**Figure S78.** <sup>1</sup>H NMR (500 MHz, CDCl<sub>3</sub>) spectra of compound **5h**

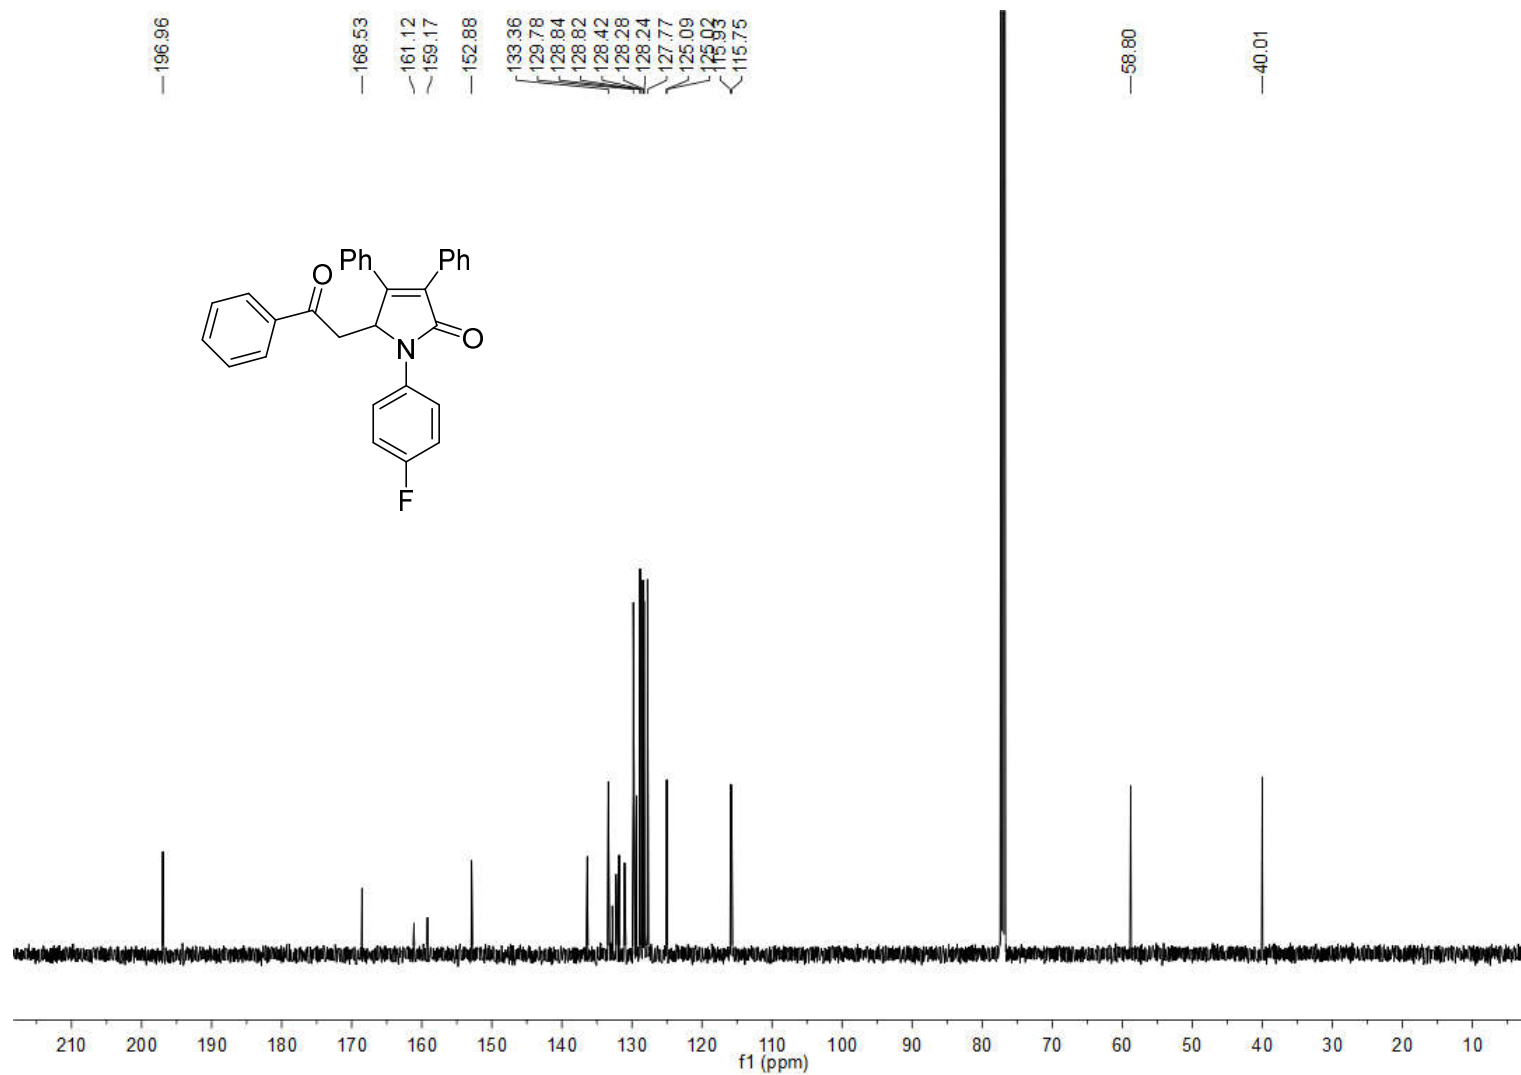

Figure S79.  $^{13}\text{C}$  NMR (125 MHz,  $\text{CDCl}_3$ ) spectra of compound 5h

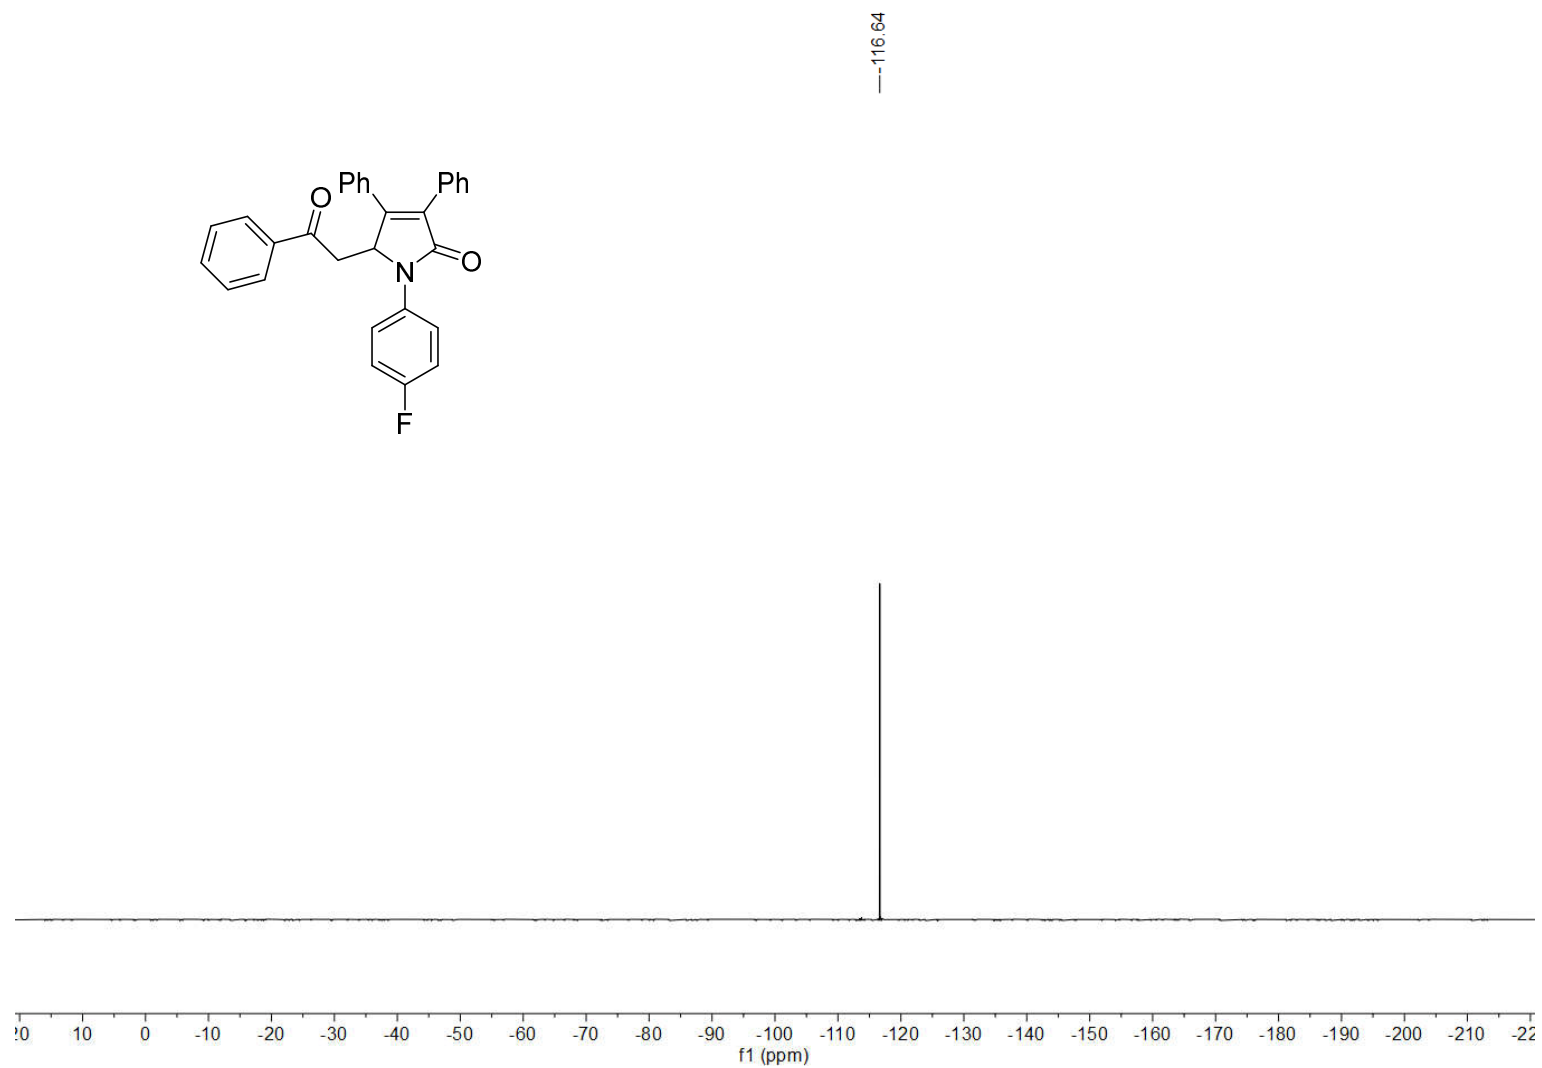

**Figure S80.**  $^{19}\text{F}$  NMR (470 MHz,  $\text{CDCl}_3$ ) spectra of compound **5h**

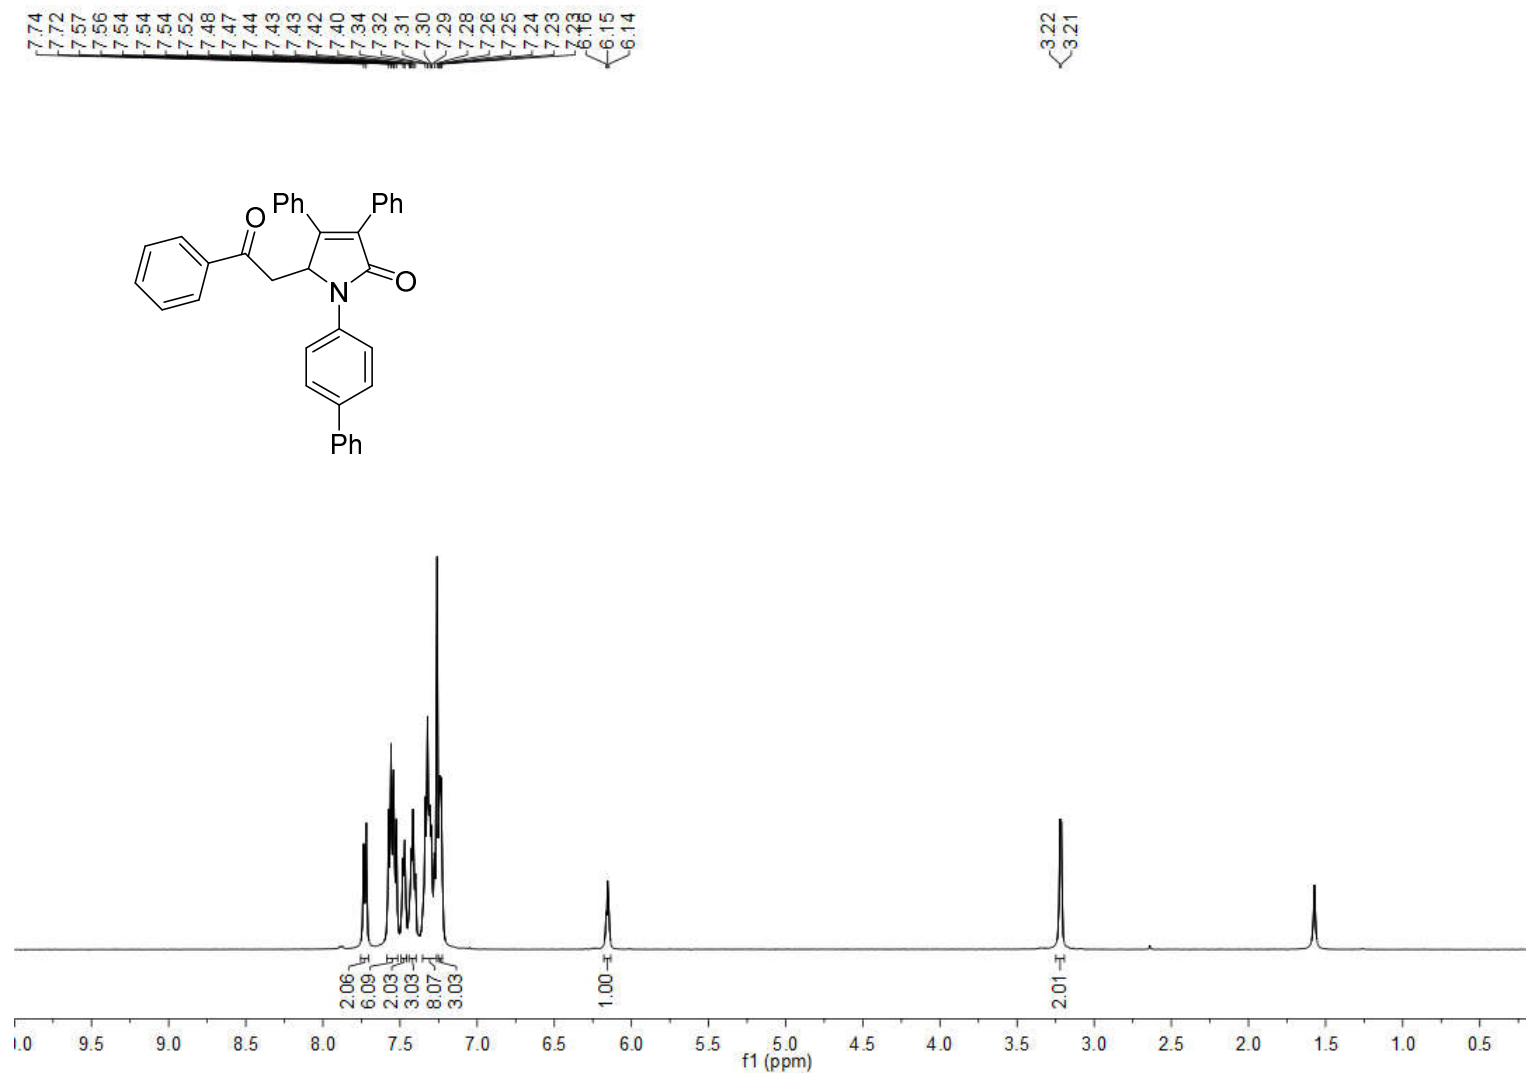

**Figure S81.** <sup>1</sup>H NMR (500 MHz, CDCl<sub>3</sub>) spectra of compound **5i**

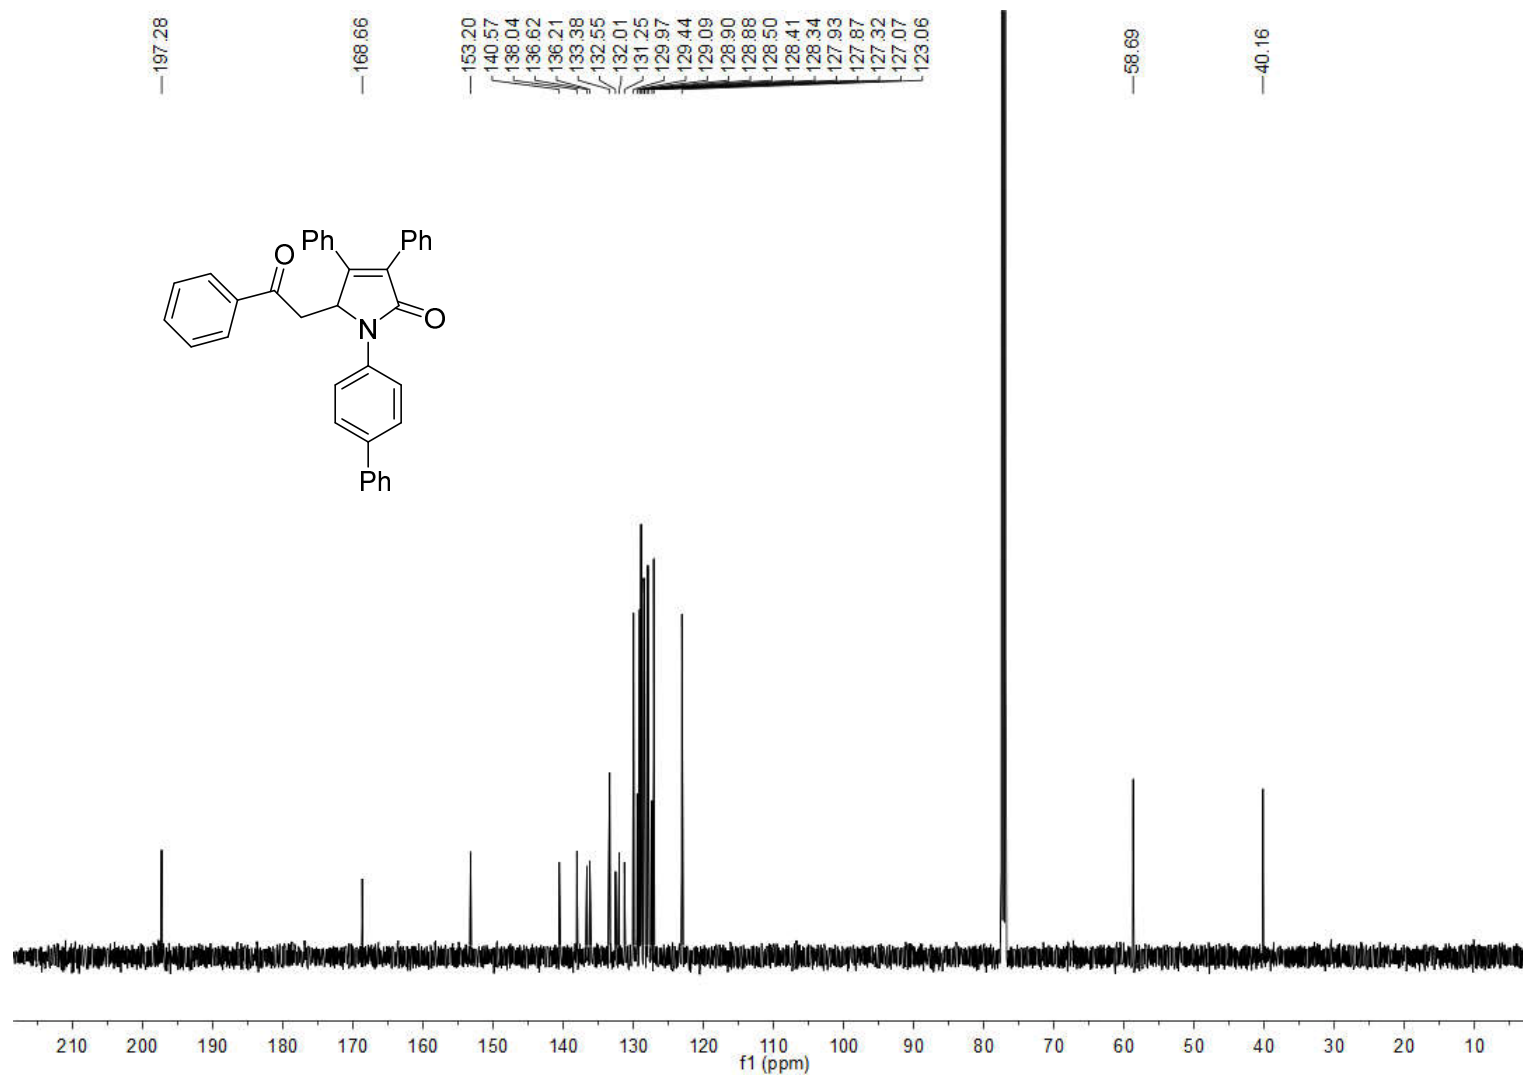

**Figure S82.**  $^{13}\text{C}$  NMR (125 MHz,  $\text{CDCl}_3$ ) spectra of compound **5i**

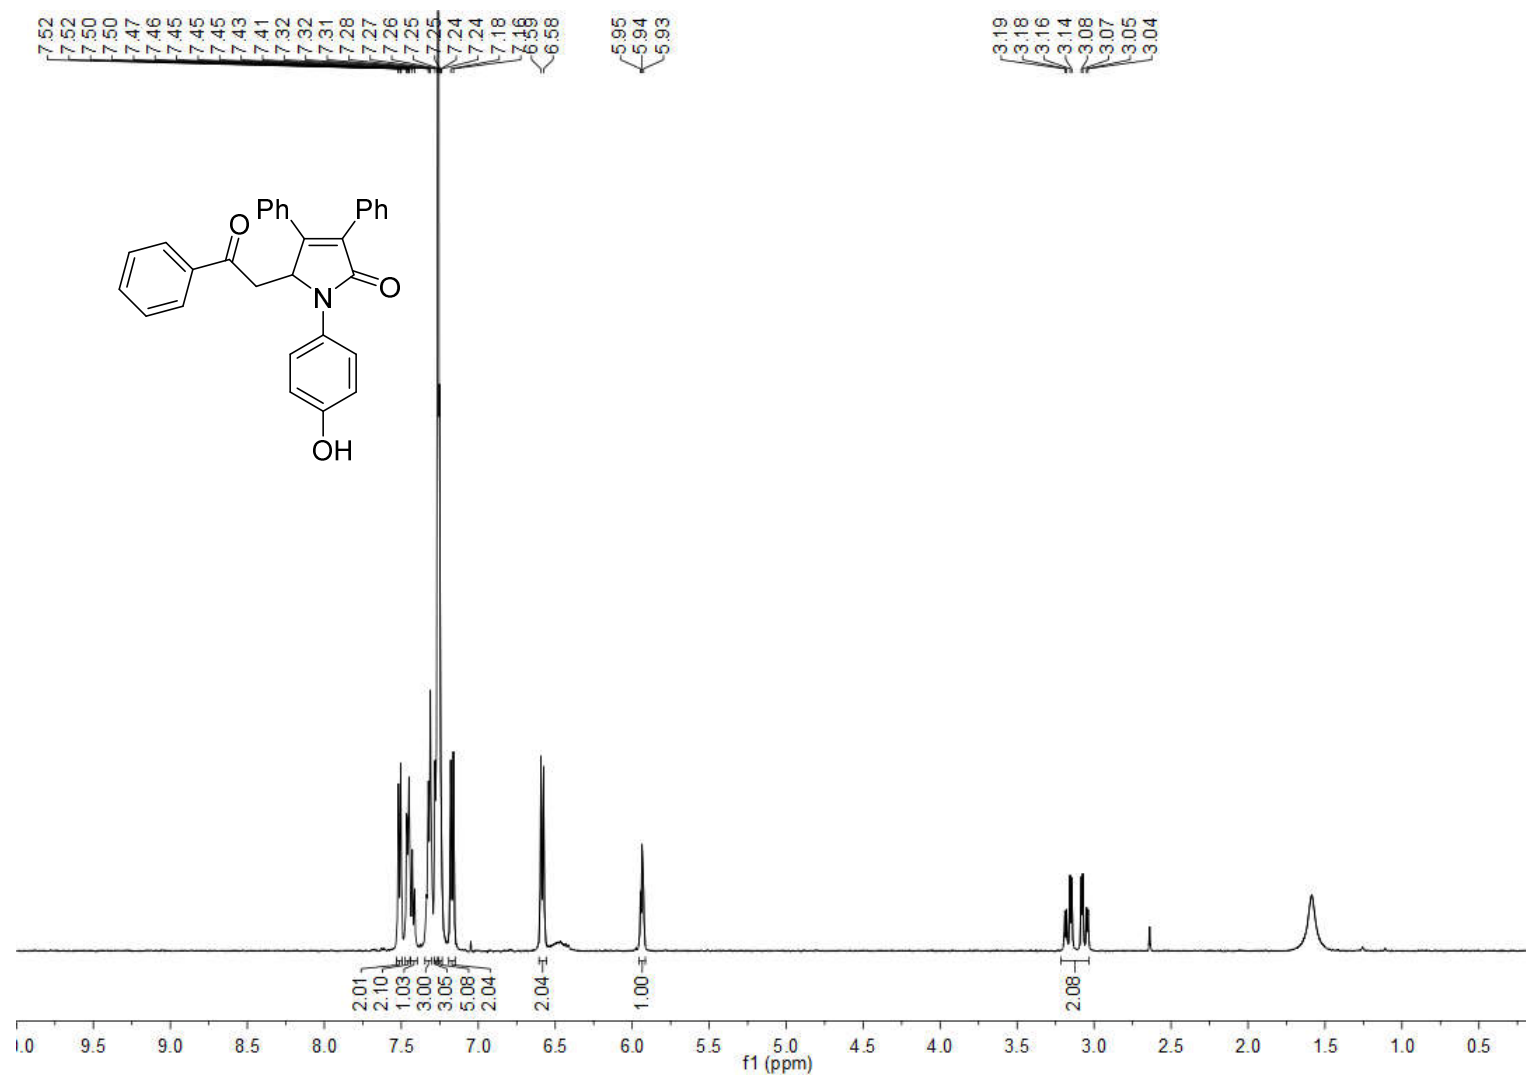



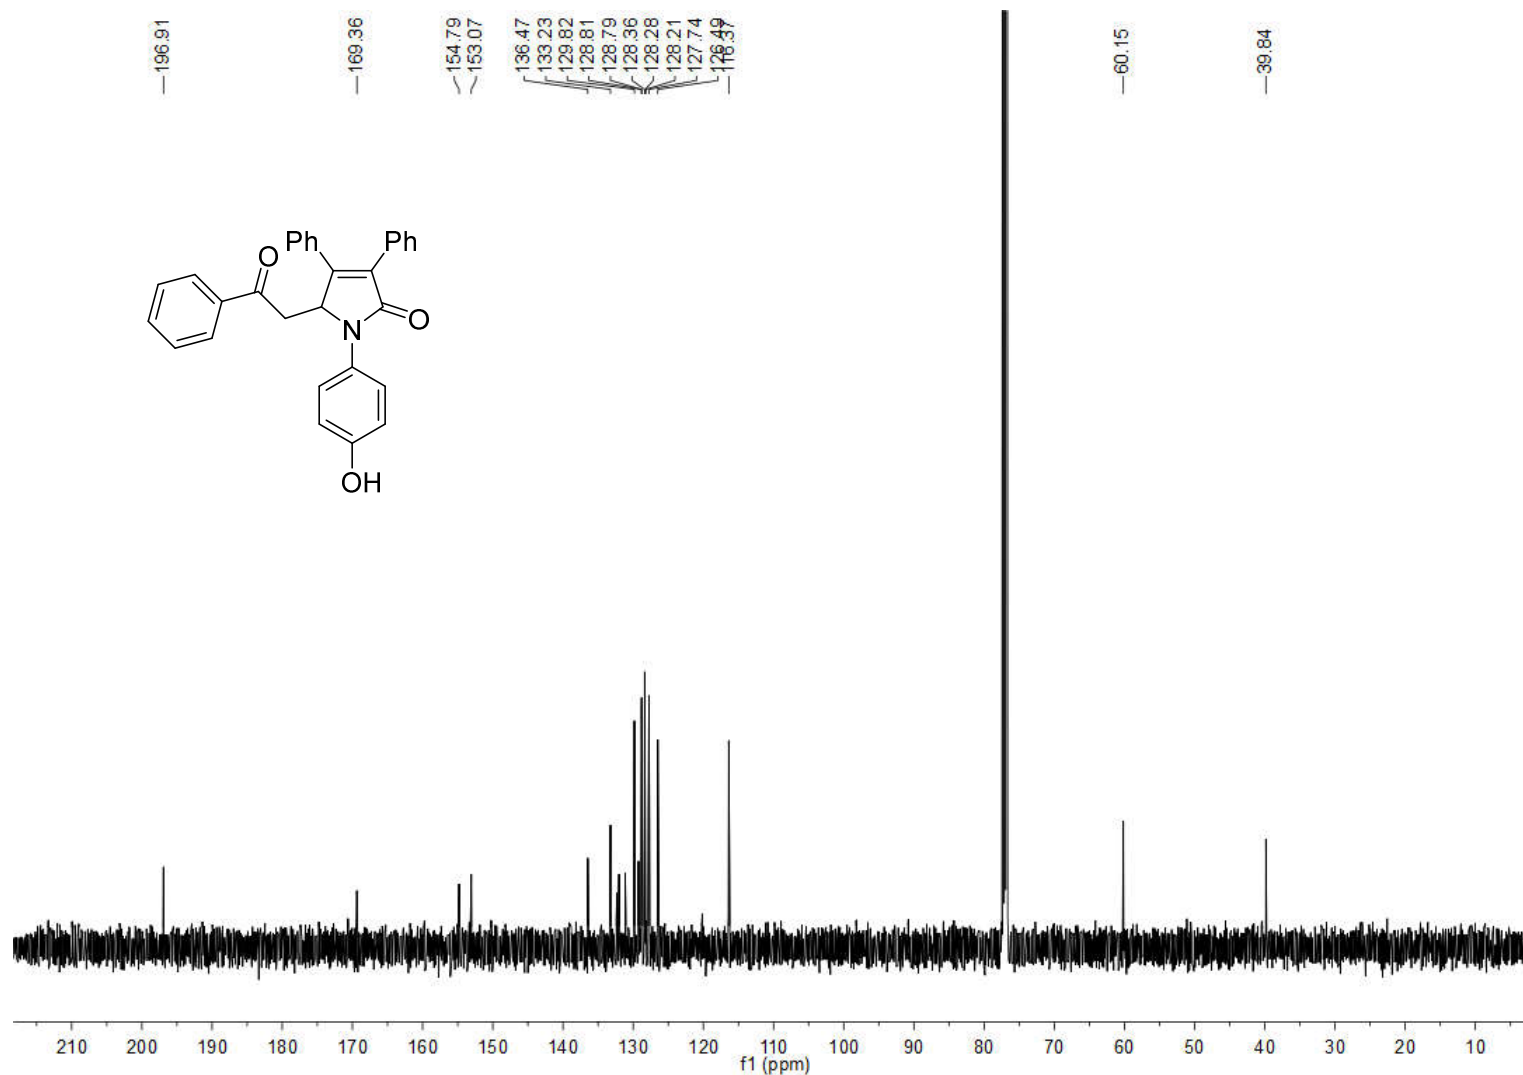

Figure S84. <sup>13</sup>C NMR (125 MHz, CDCl<sub>3</sub>) spectra of compound 5j

ZZL-133.1.fid

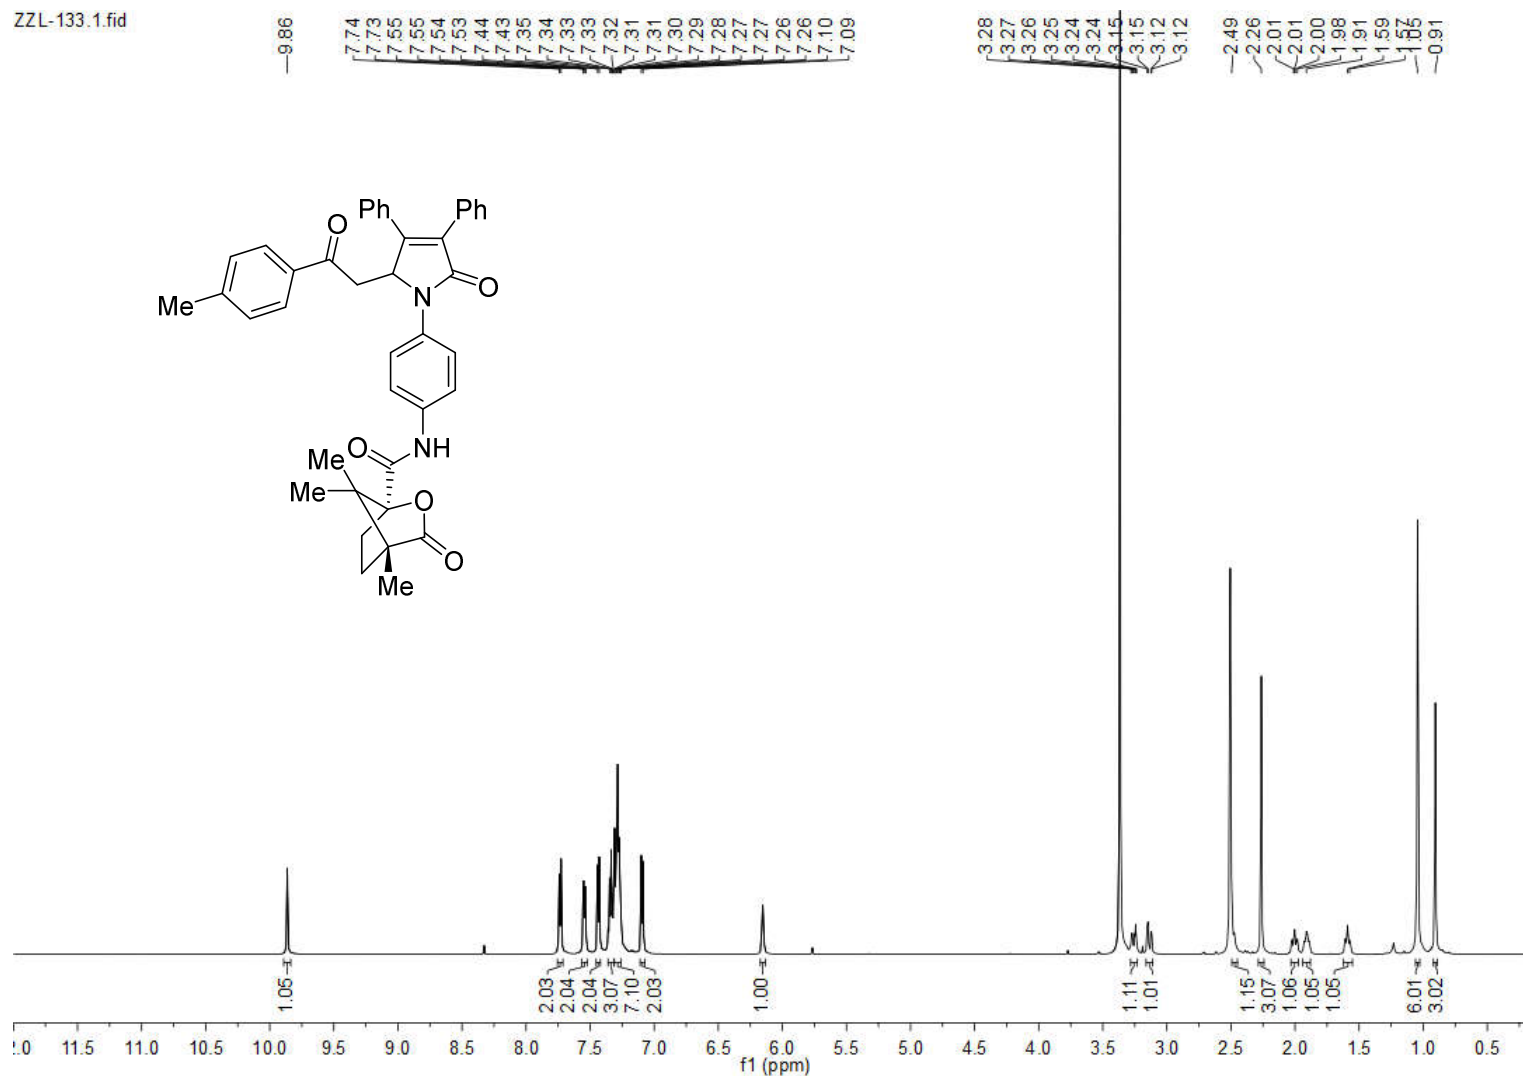

Figure S85. <sup>1</sup>H NMR (600 MHz, DMSO-*d*<sub>6</sub>) spectra of compound **5k**

ZZL-133.2.fid

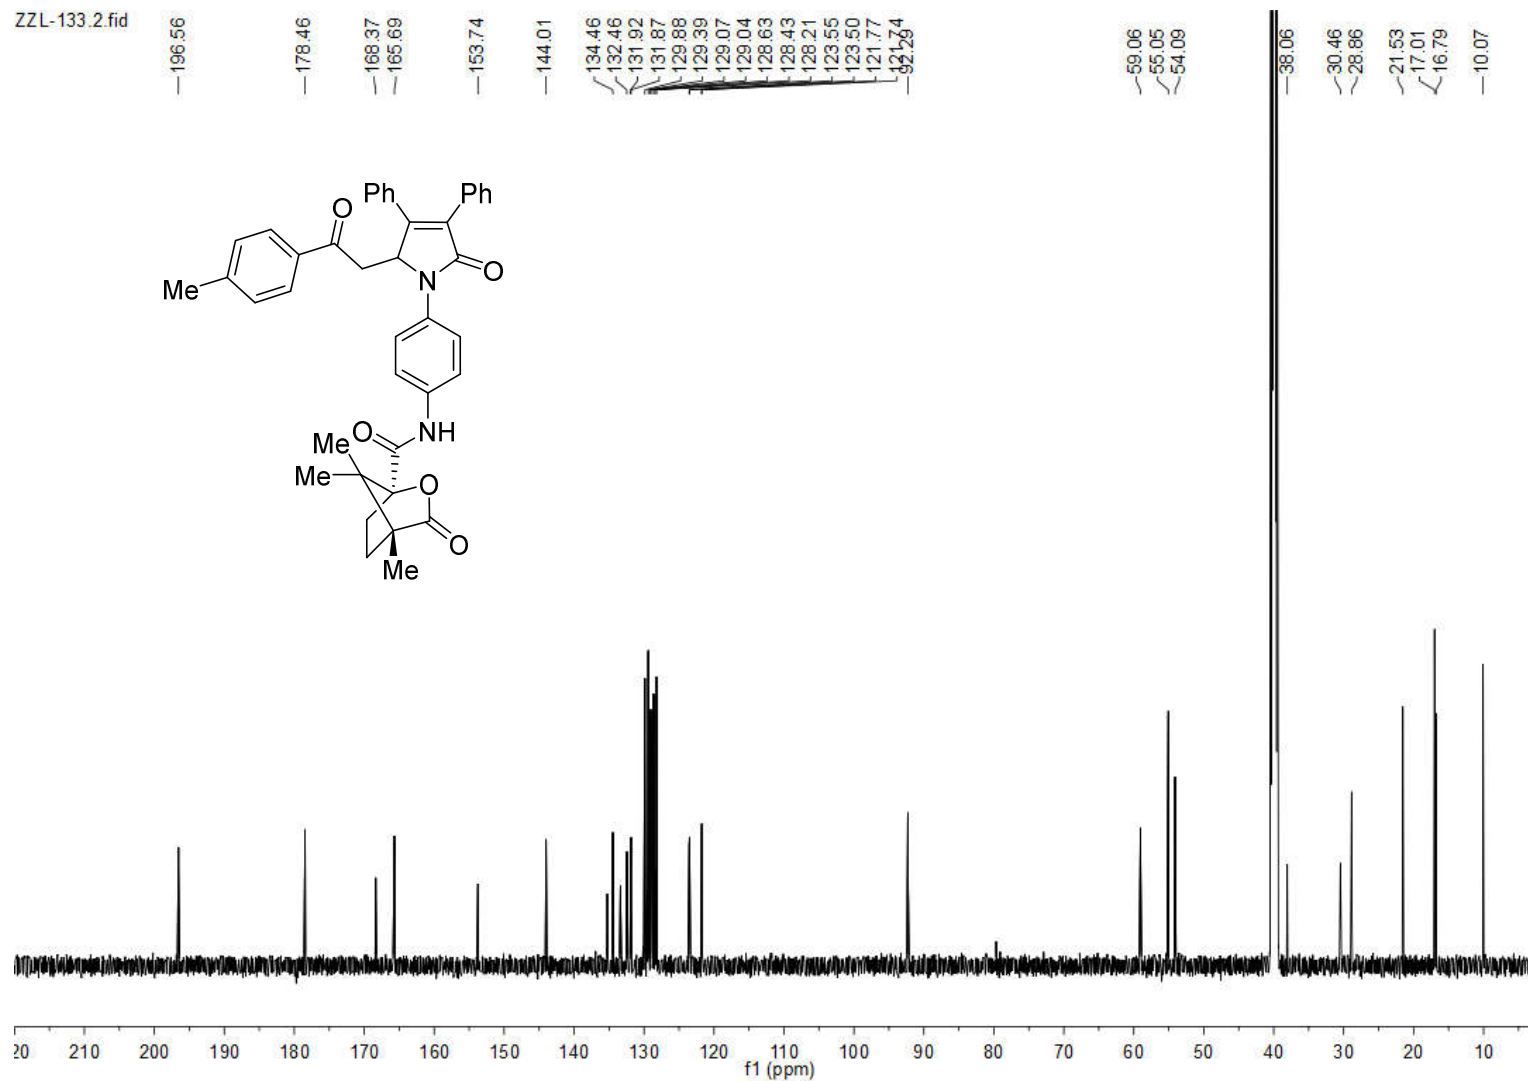

Figure S86.  $^{13}\text{C}$  NMR (150 MHz,  $\text{DMSO-}d_6$ ) spectra of compound 5k

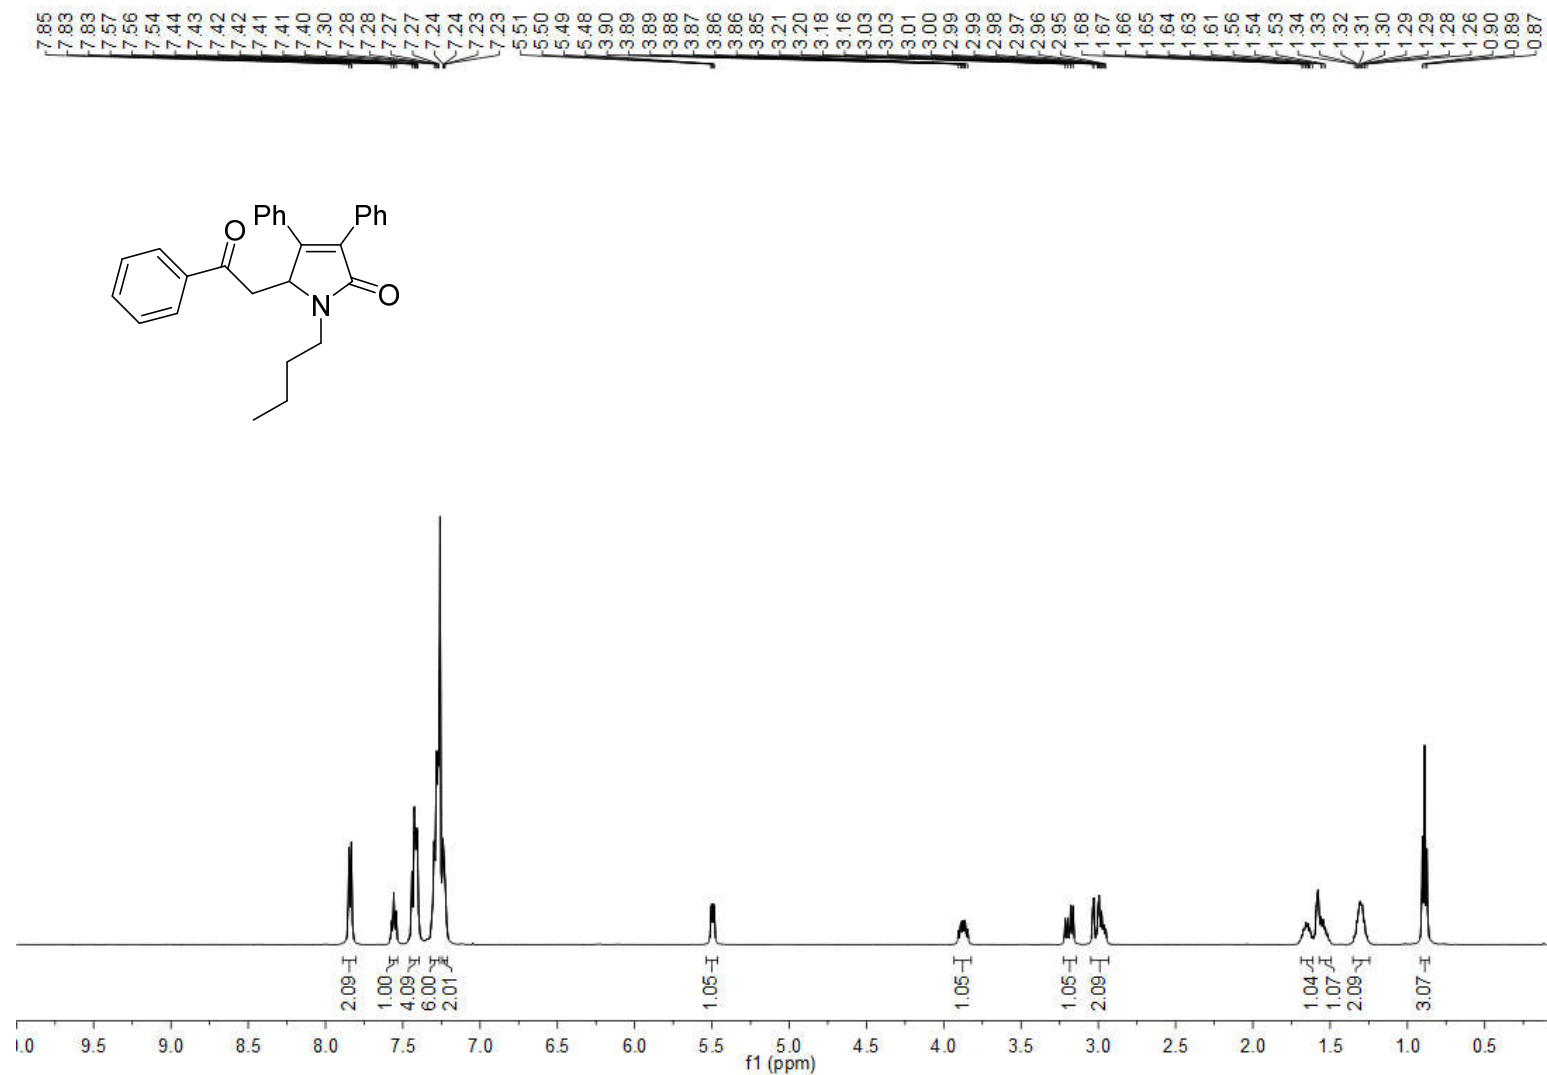

**Figure S87.** <sup>1</sup>H NMR (500 MHz, CDCl<sub>3</sub>) spectra of compound **51**

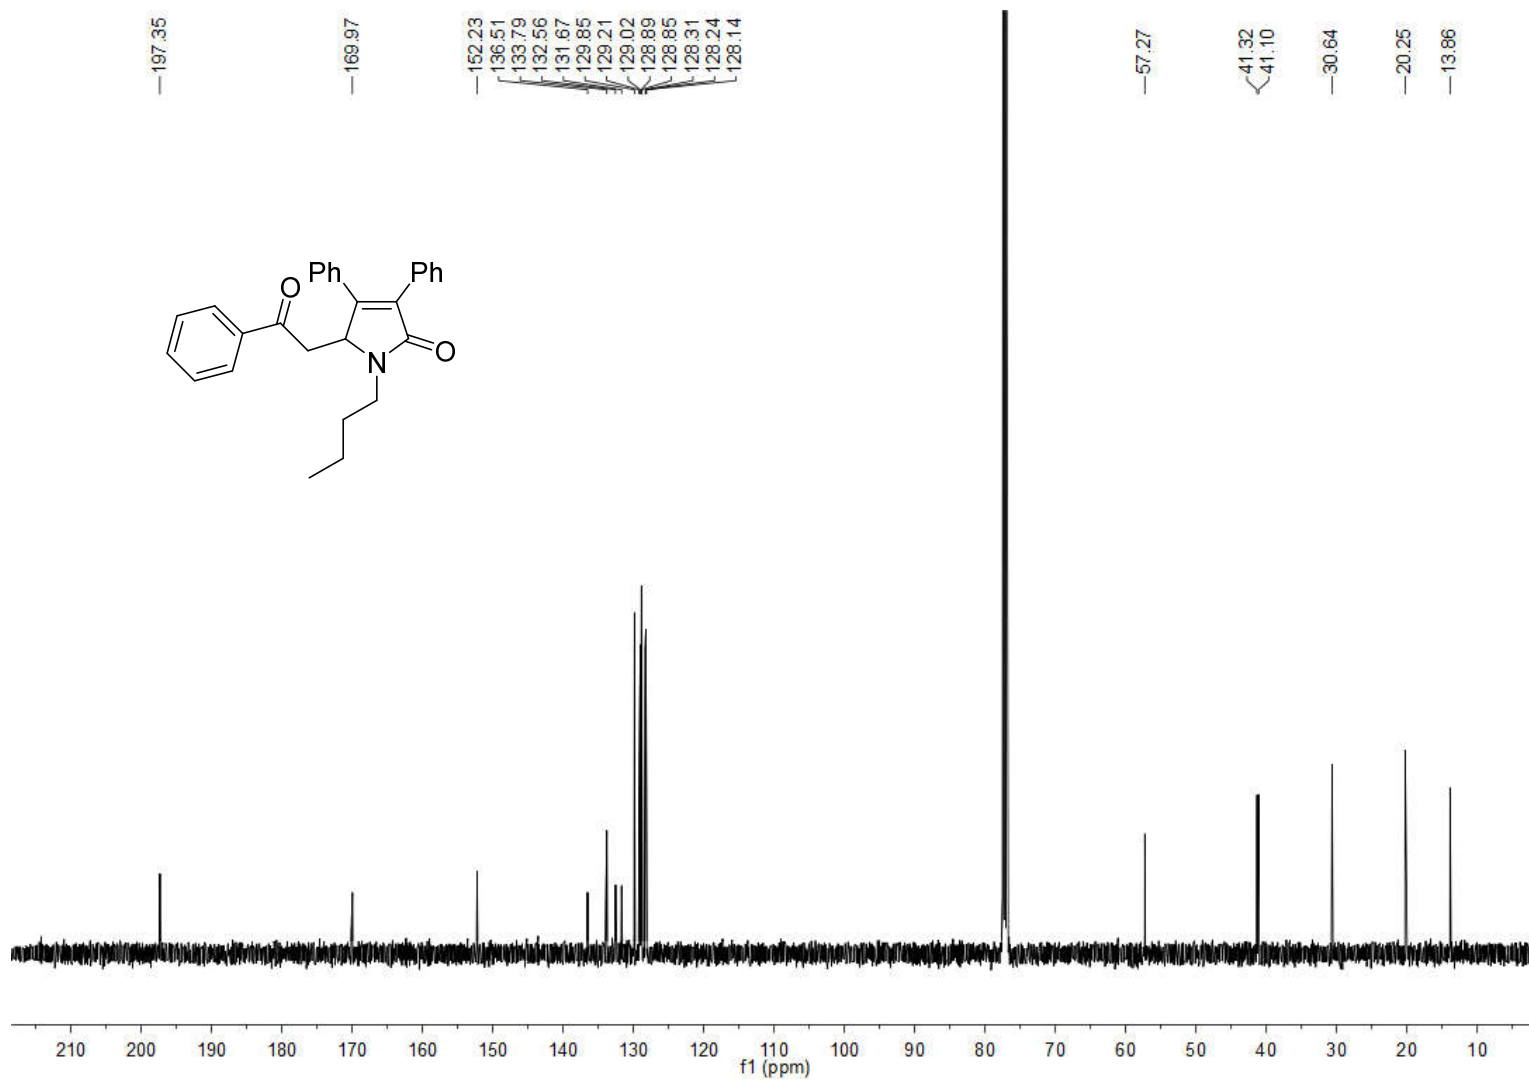

**Figure S88.**  $^{13}\text{C}$  NMR (125 MHz,  $\text{CDCl}_3$ ) spectra of compound **51**

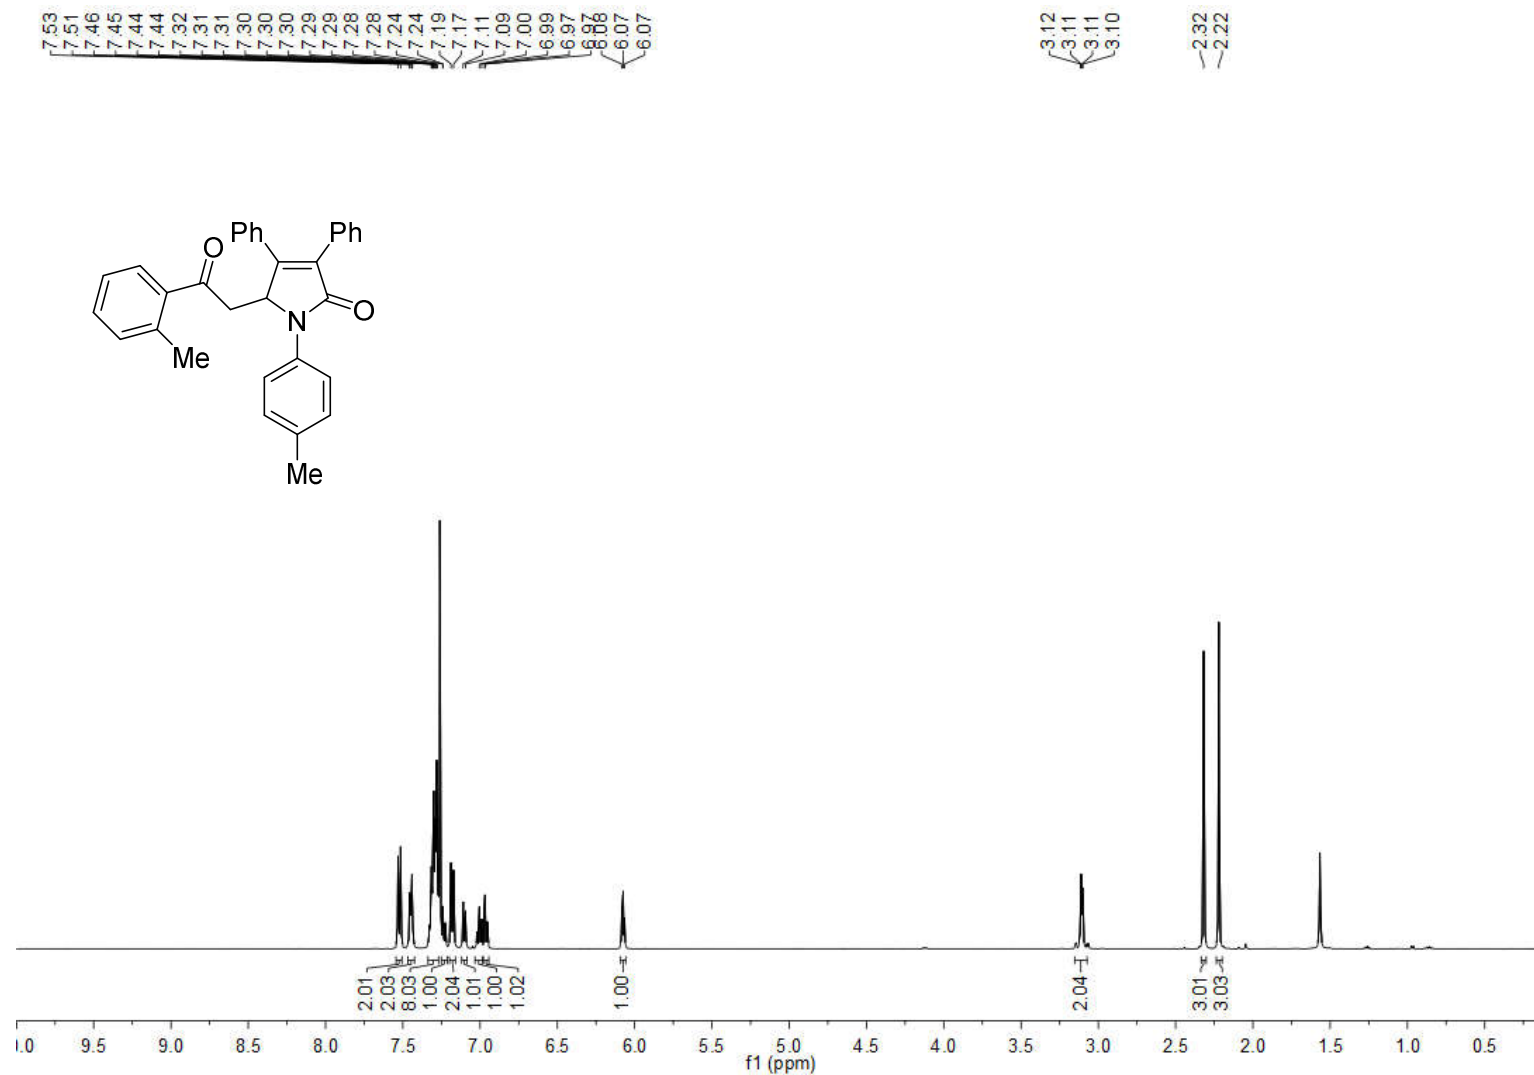

**Figure S89.** <sup>1</sup>H NMR (500 MHz, CDCl<sub>3</sub>) spectra of compound **5m**

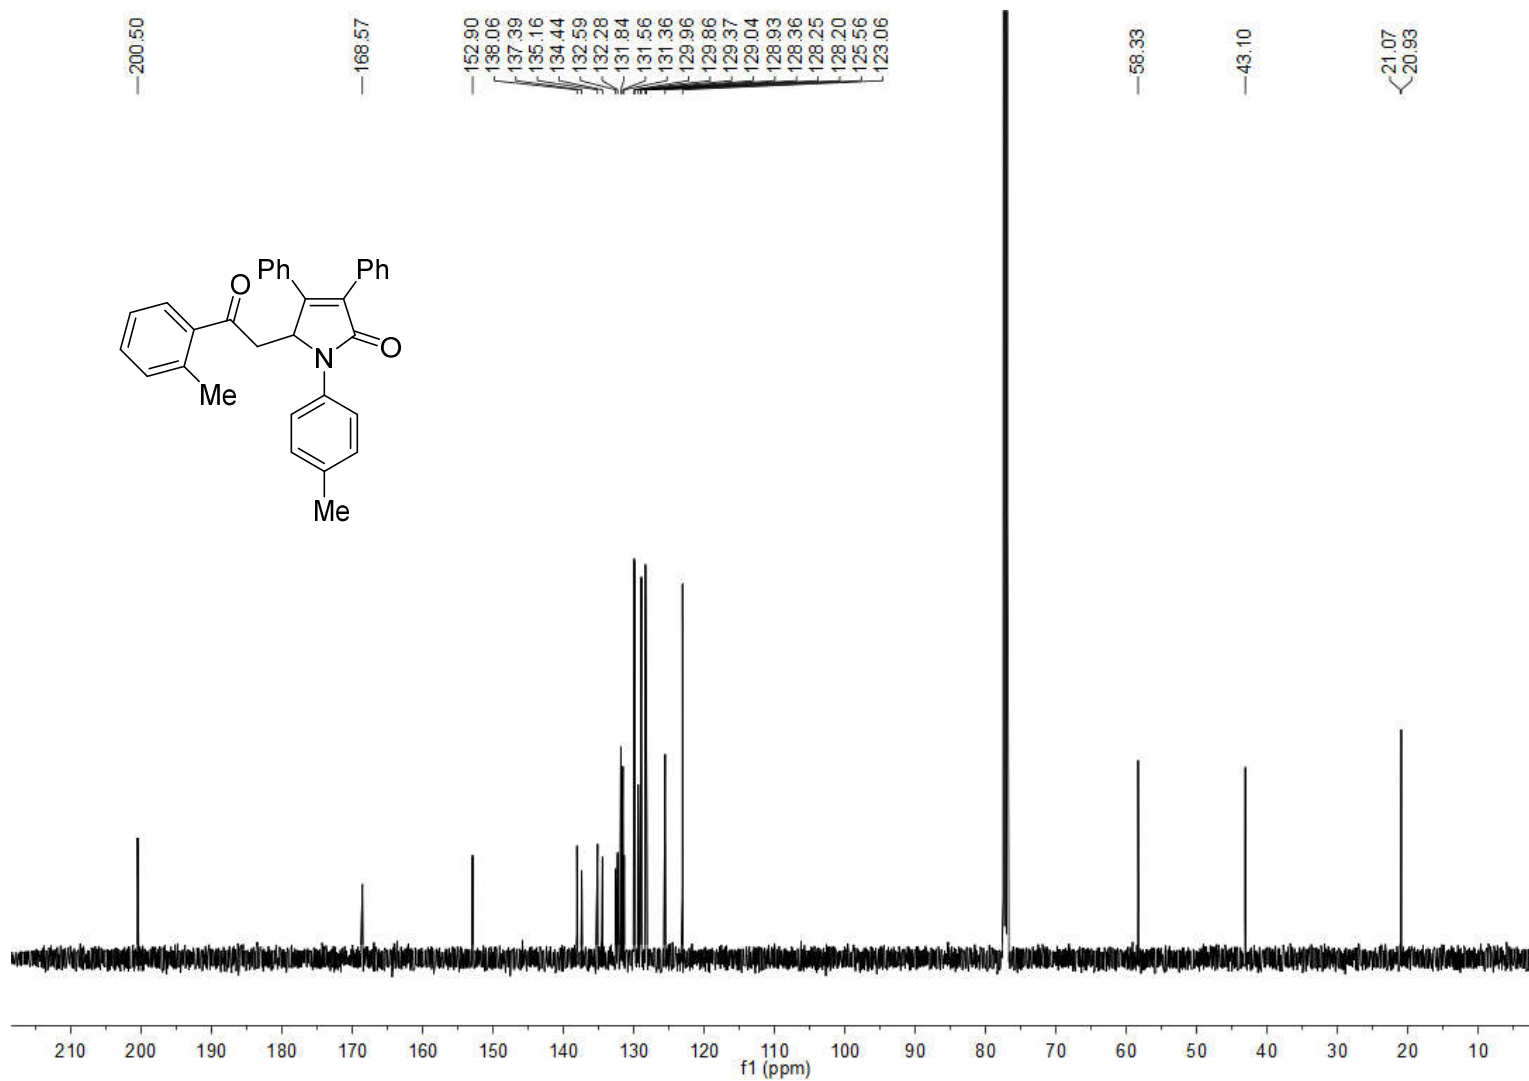

**Figure S90.**  $^{13}\text{C}$  NMR (125 MHz,  $\text{CDCl}_3$ ) spectra of compound **5m**

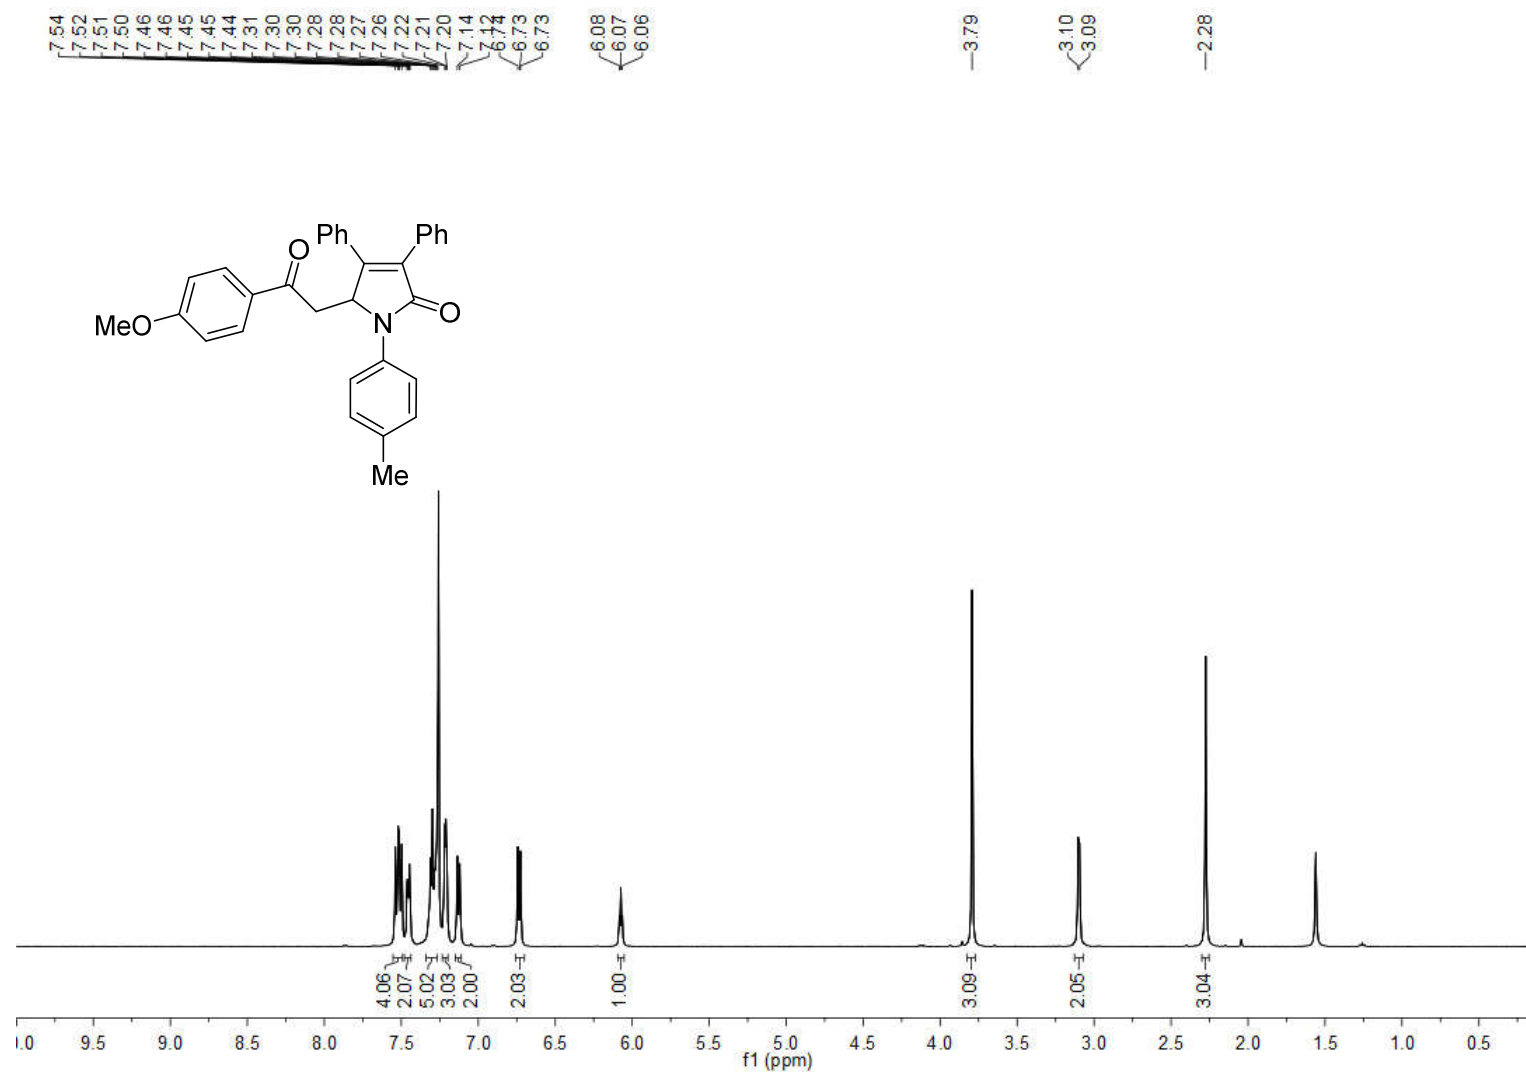

**Figure S91.** <sup>1</sup>H NMR (500 MHz, CDCl<sub>3</sub>) spectra of compound **5n**



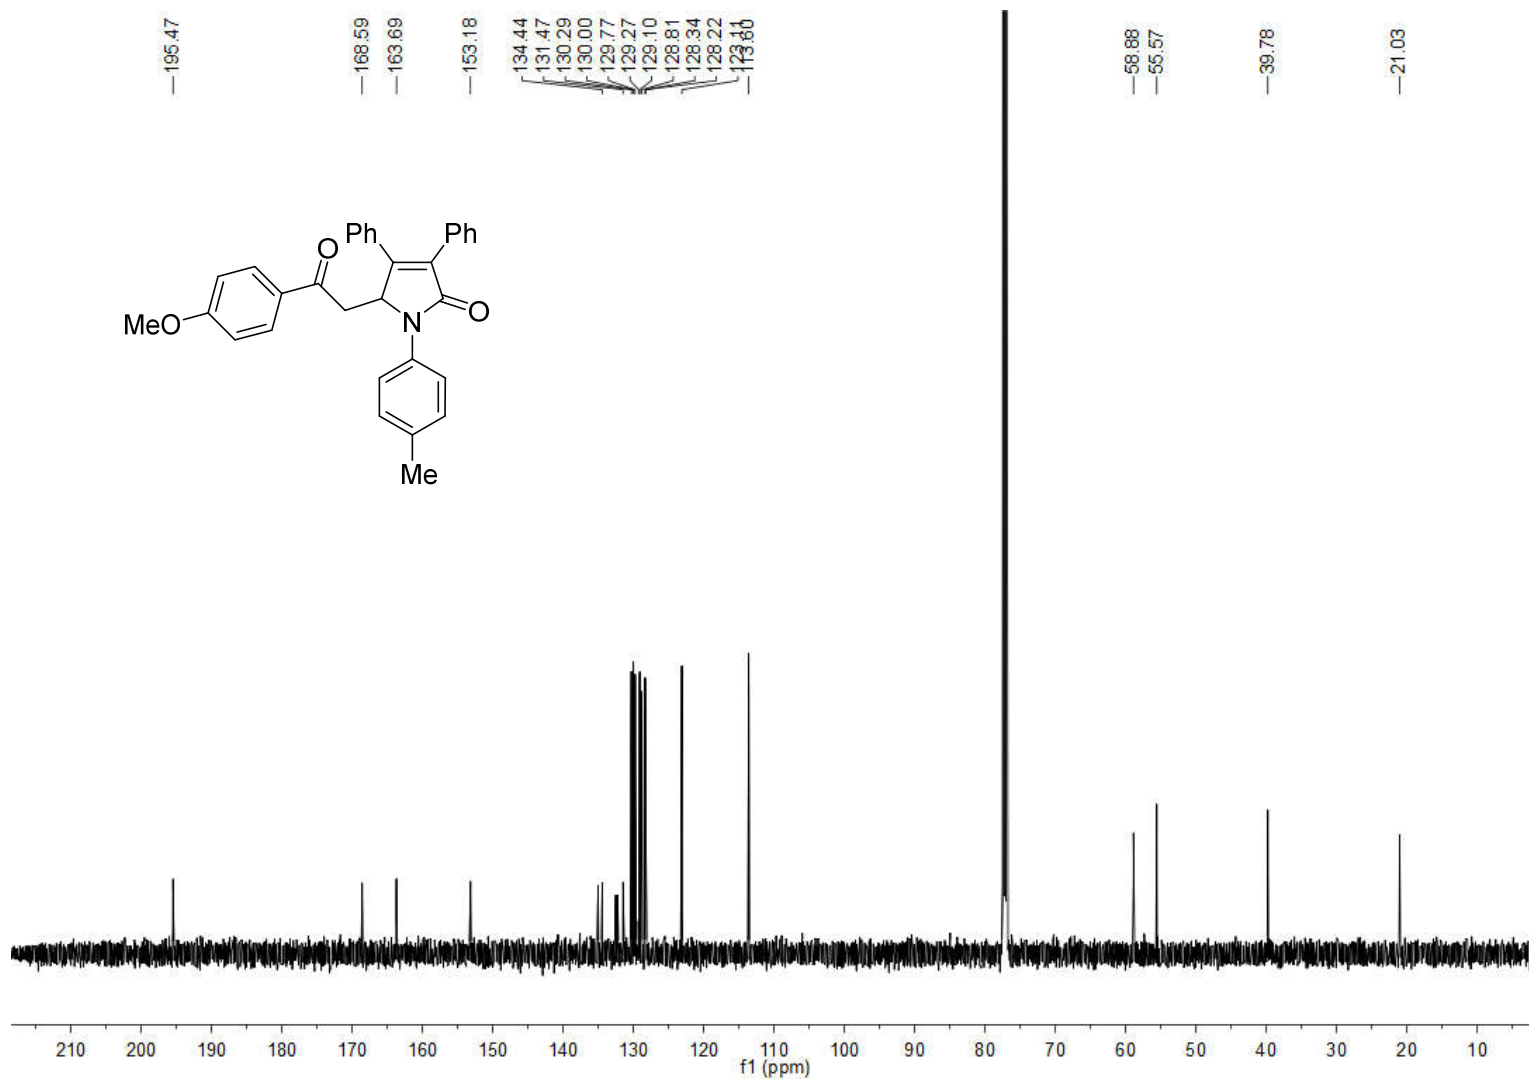

Figure S92. <sup>13</sup>C NMR (125 MHz, CDCl<sub>3</sub>) spectra of compound 5n

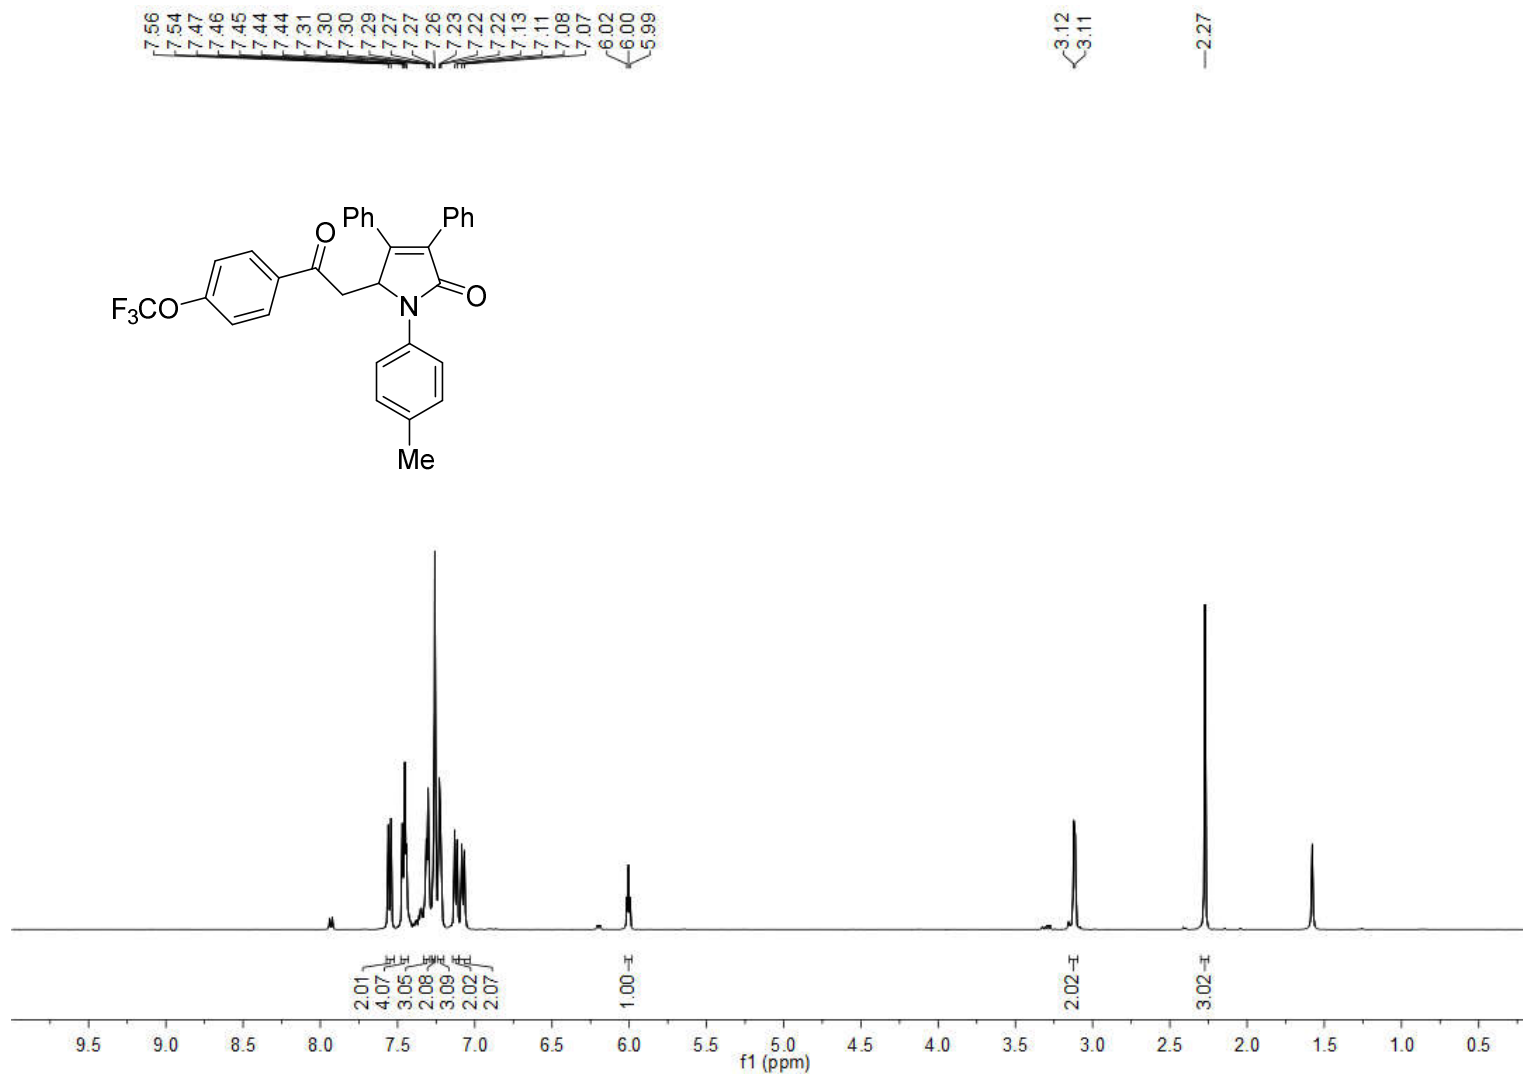

**Figure S93.** <sup>1</sup>H NMR (500 MHz, CDCl<sub>3</sub>) spectra of compound **5o**

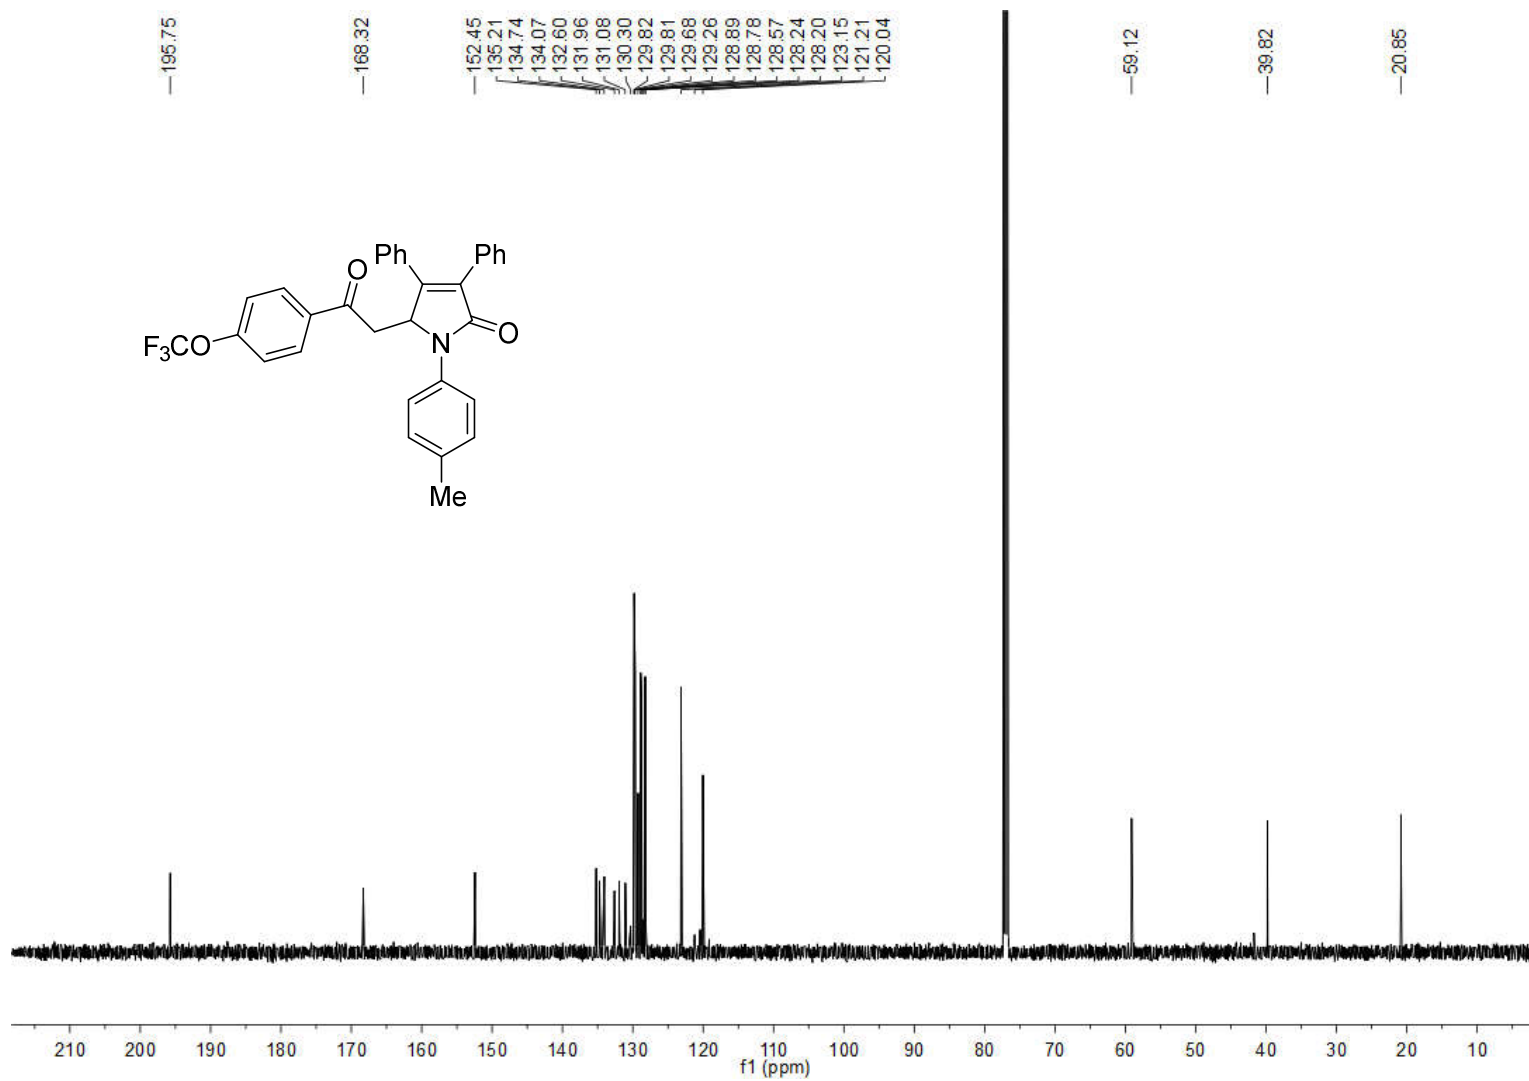

**Figure S94.** <sup>13</sup>C NMR (125 MHz, CDCl<sub>3</sub>) spectra of compound **5o**

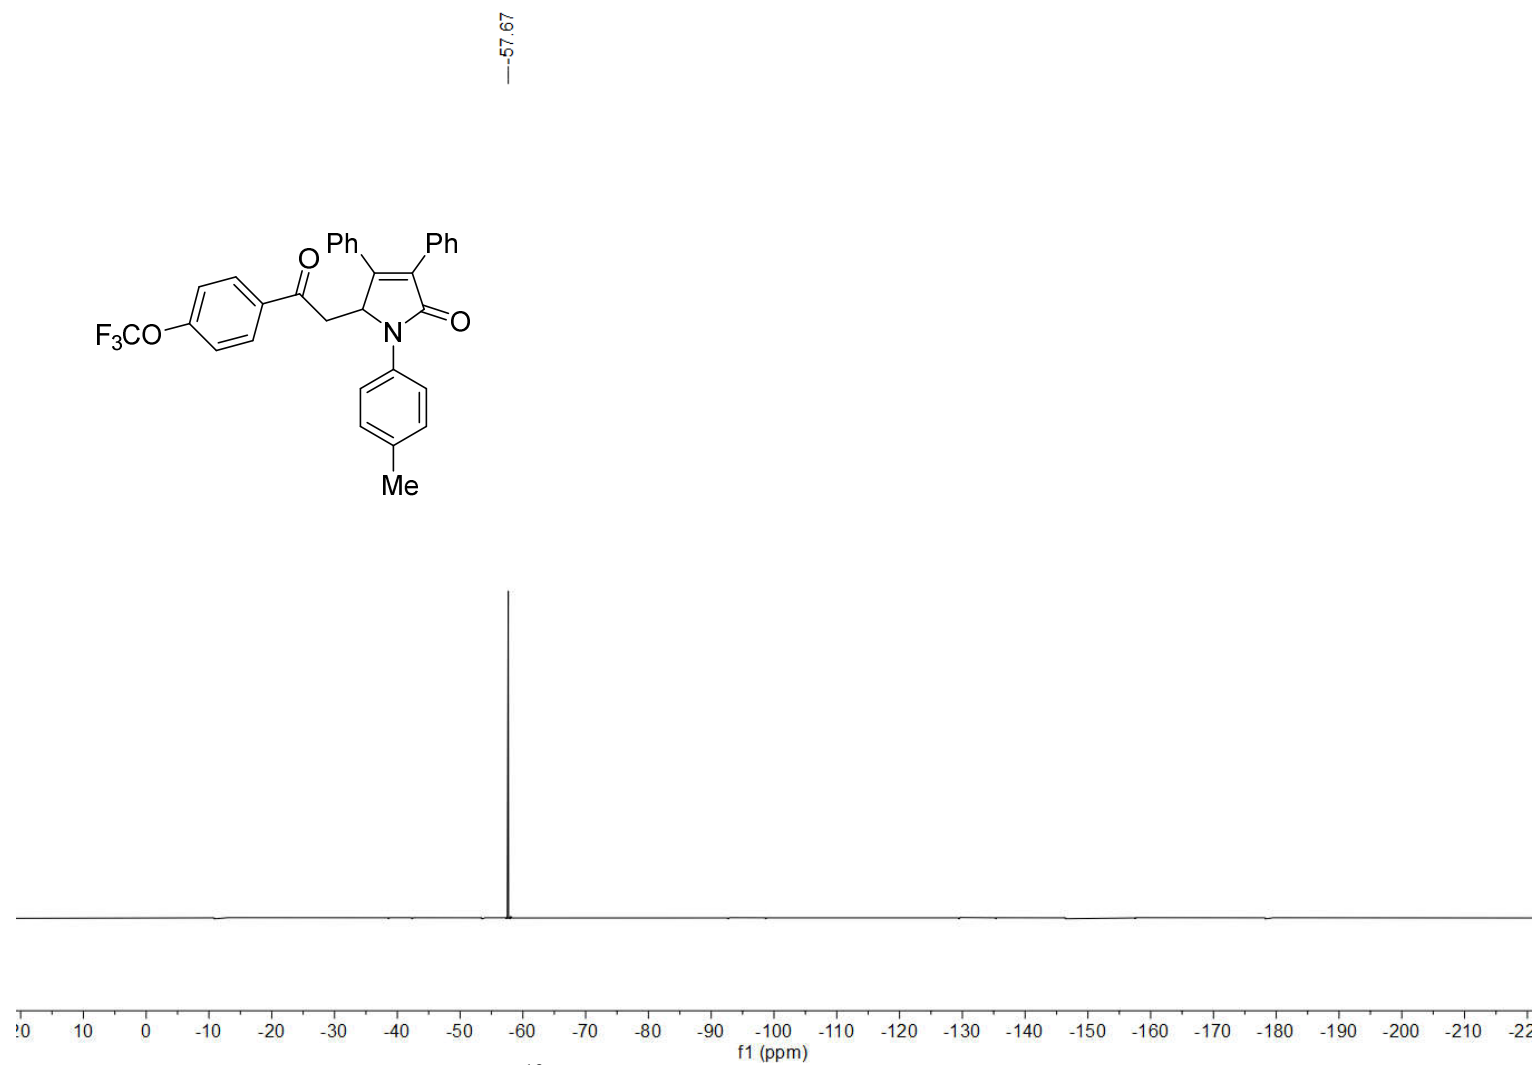

**Figure S95.**  $^{19}\text{F}$  NMR (470 MHz,  $\text{CDCl}_3$ ) spectra of compound **5o**

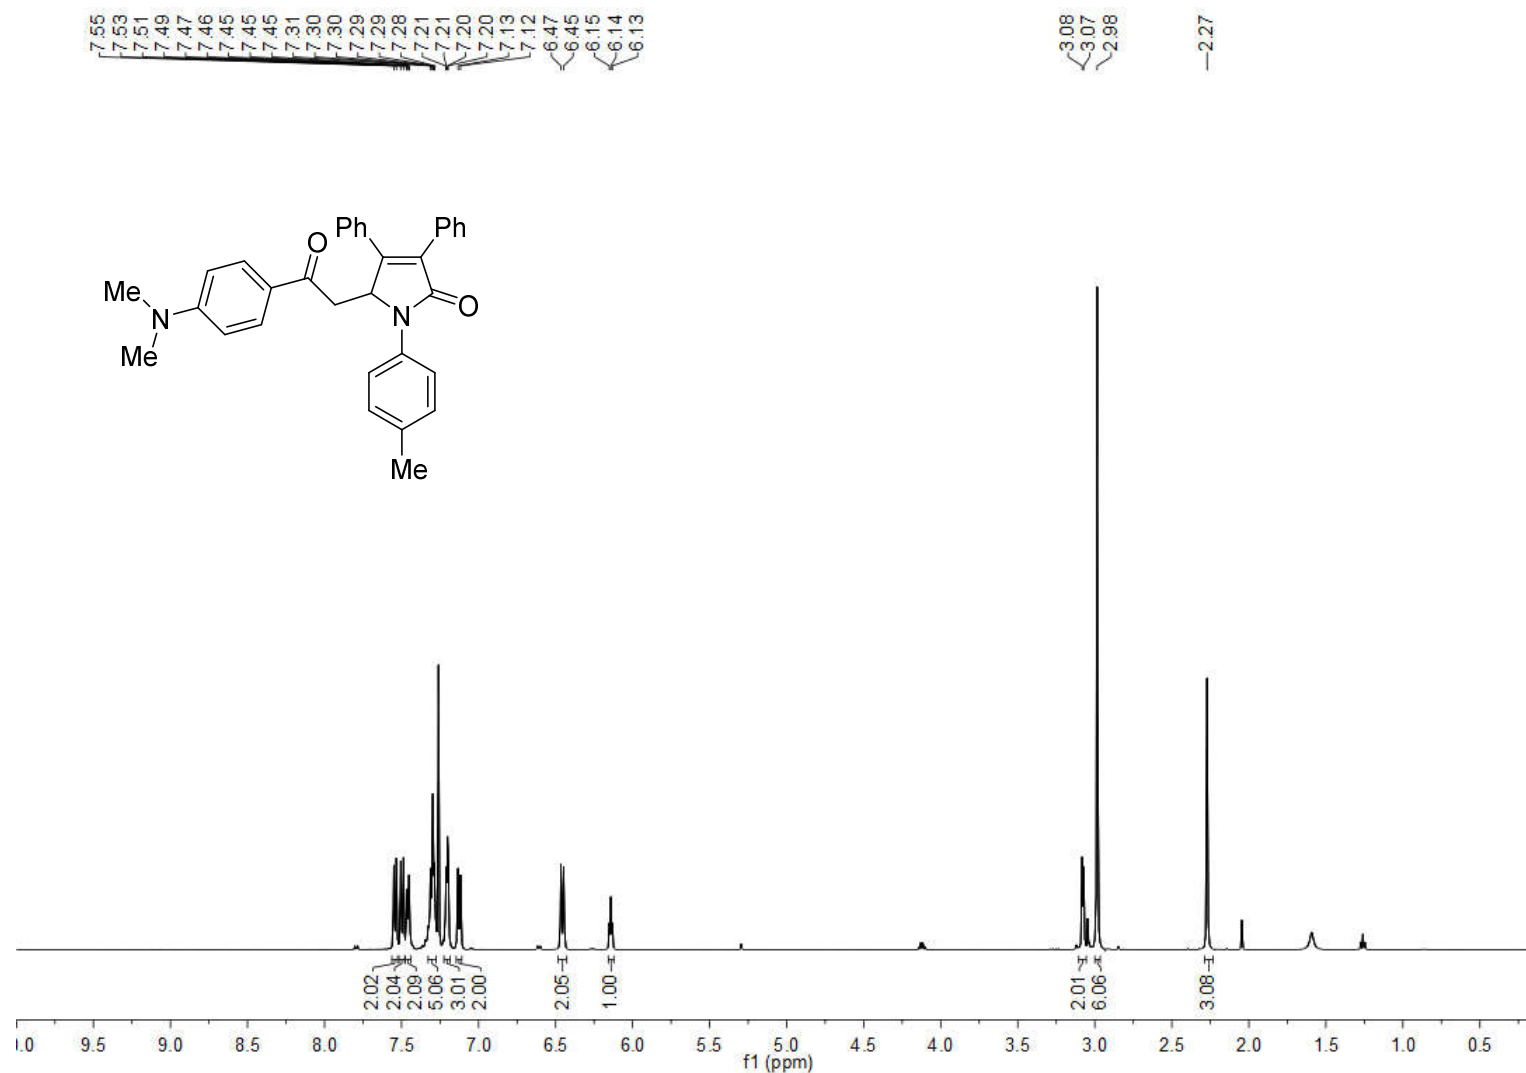

**Figure S96.** <sup>1</sup>H NMR (500 MHz, CDCl<sub>3</sub>) spectra of compound **5p**

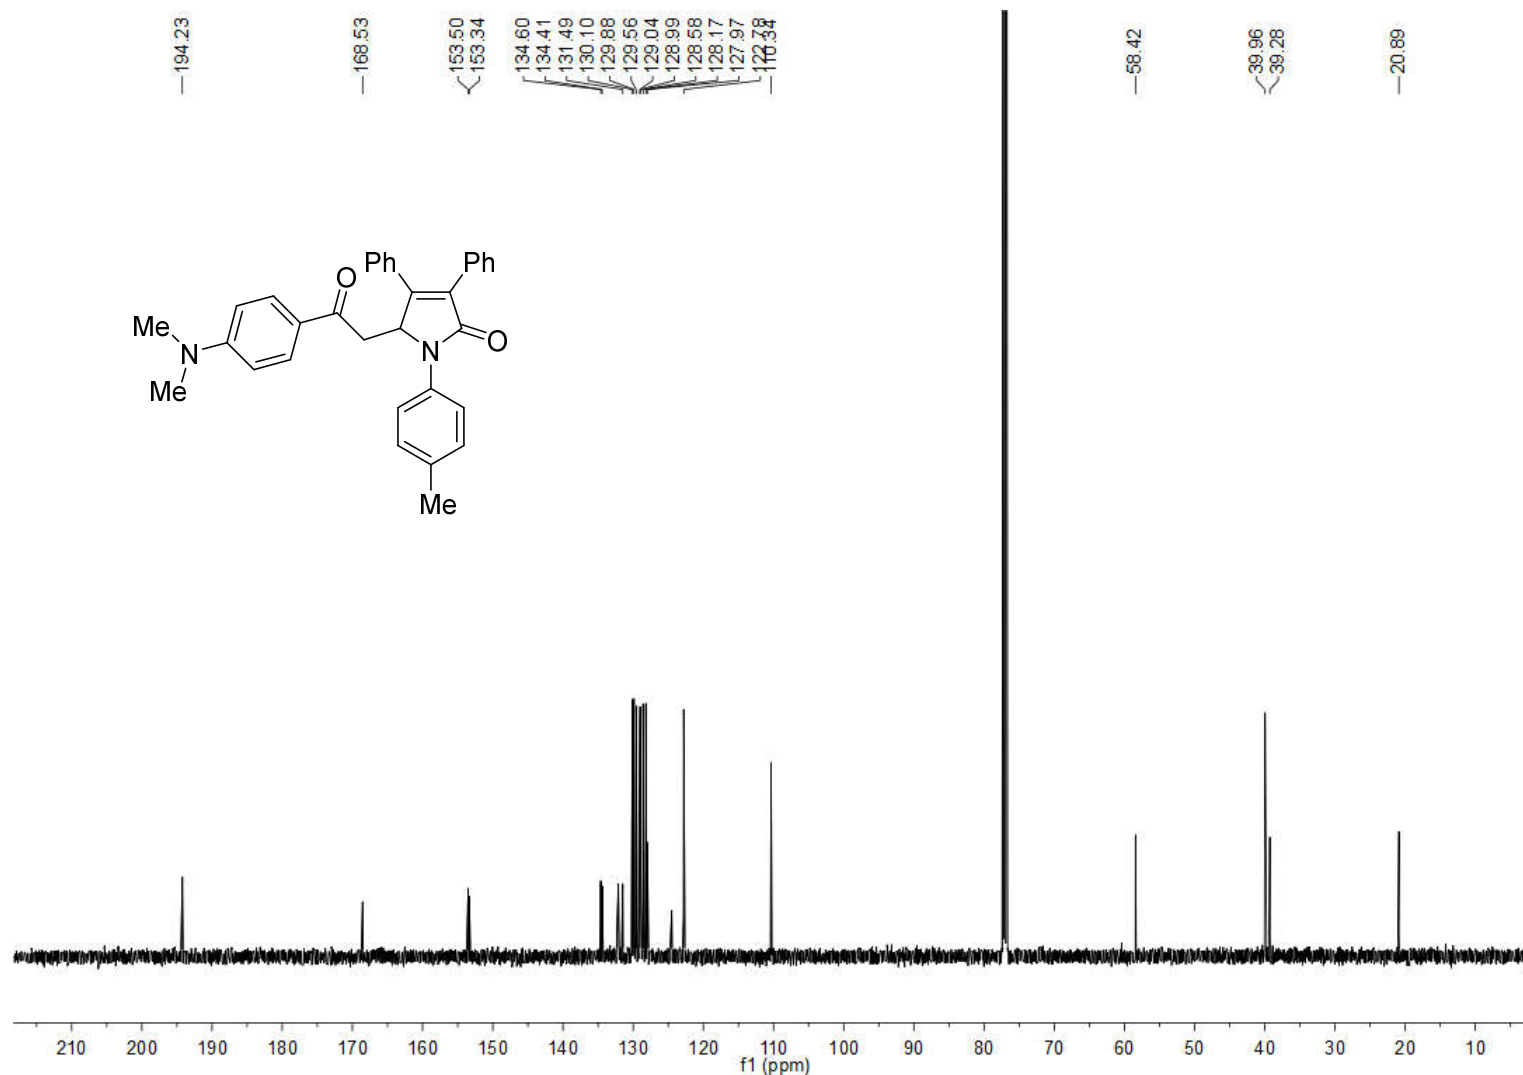

Figure S97. <sup>13</sup>C NMR (125 MHz, CDCl<sub>3</sub>) spectra of compound 5p

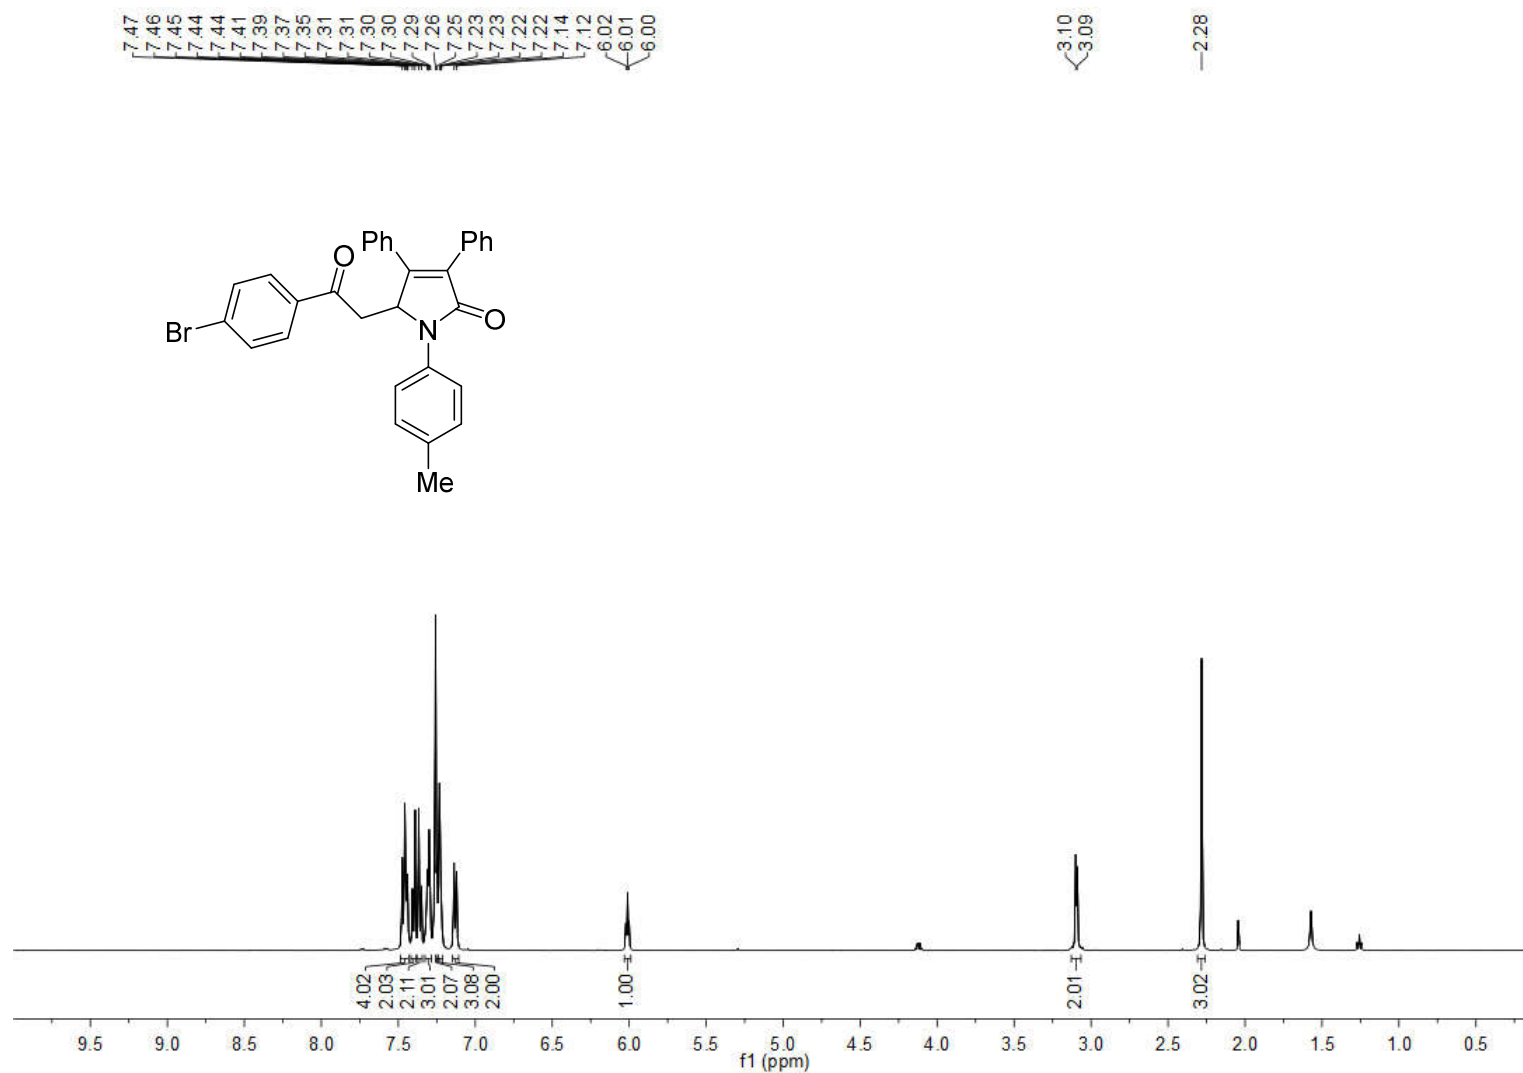

**Figure S98.** <sup>1</sup>H NMR (500 MHz, CDCl<sub>3</sub>) spectra of compound **5q**

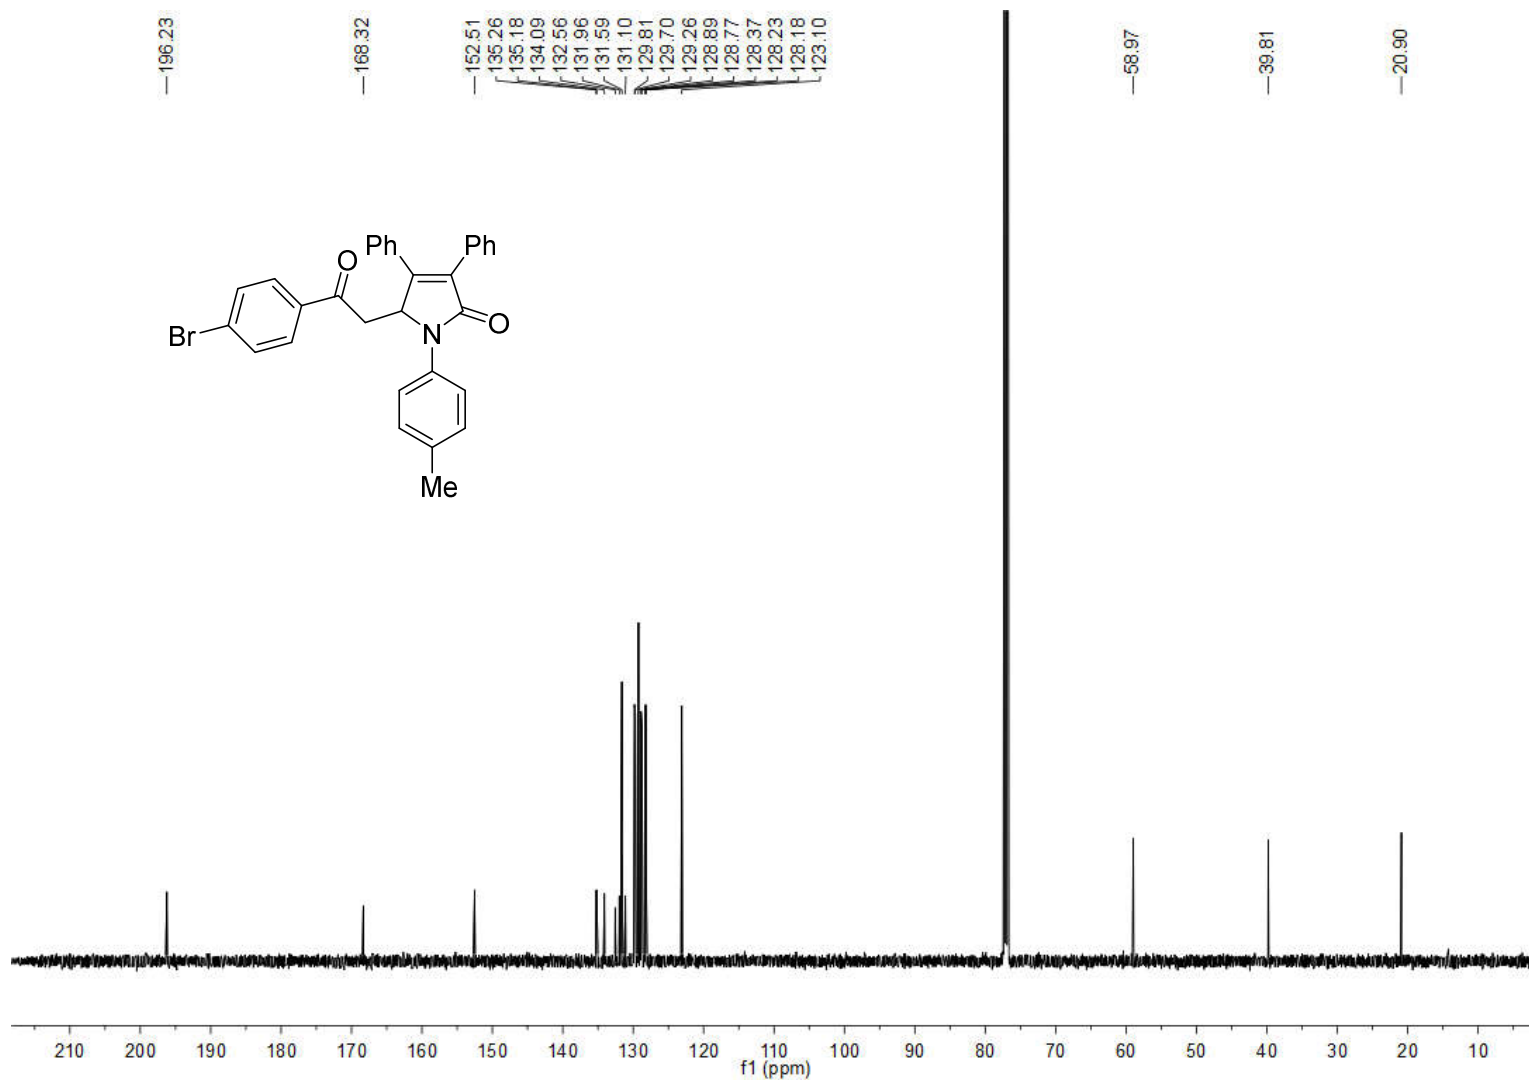

Figure S99. <sup>13</sup>C NMR (125 MHz, CDCl<sub>3</sub>) spectra of compound 5q



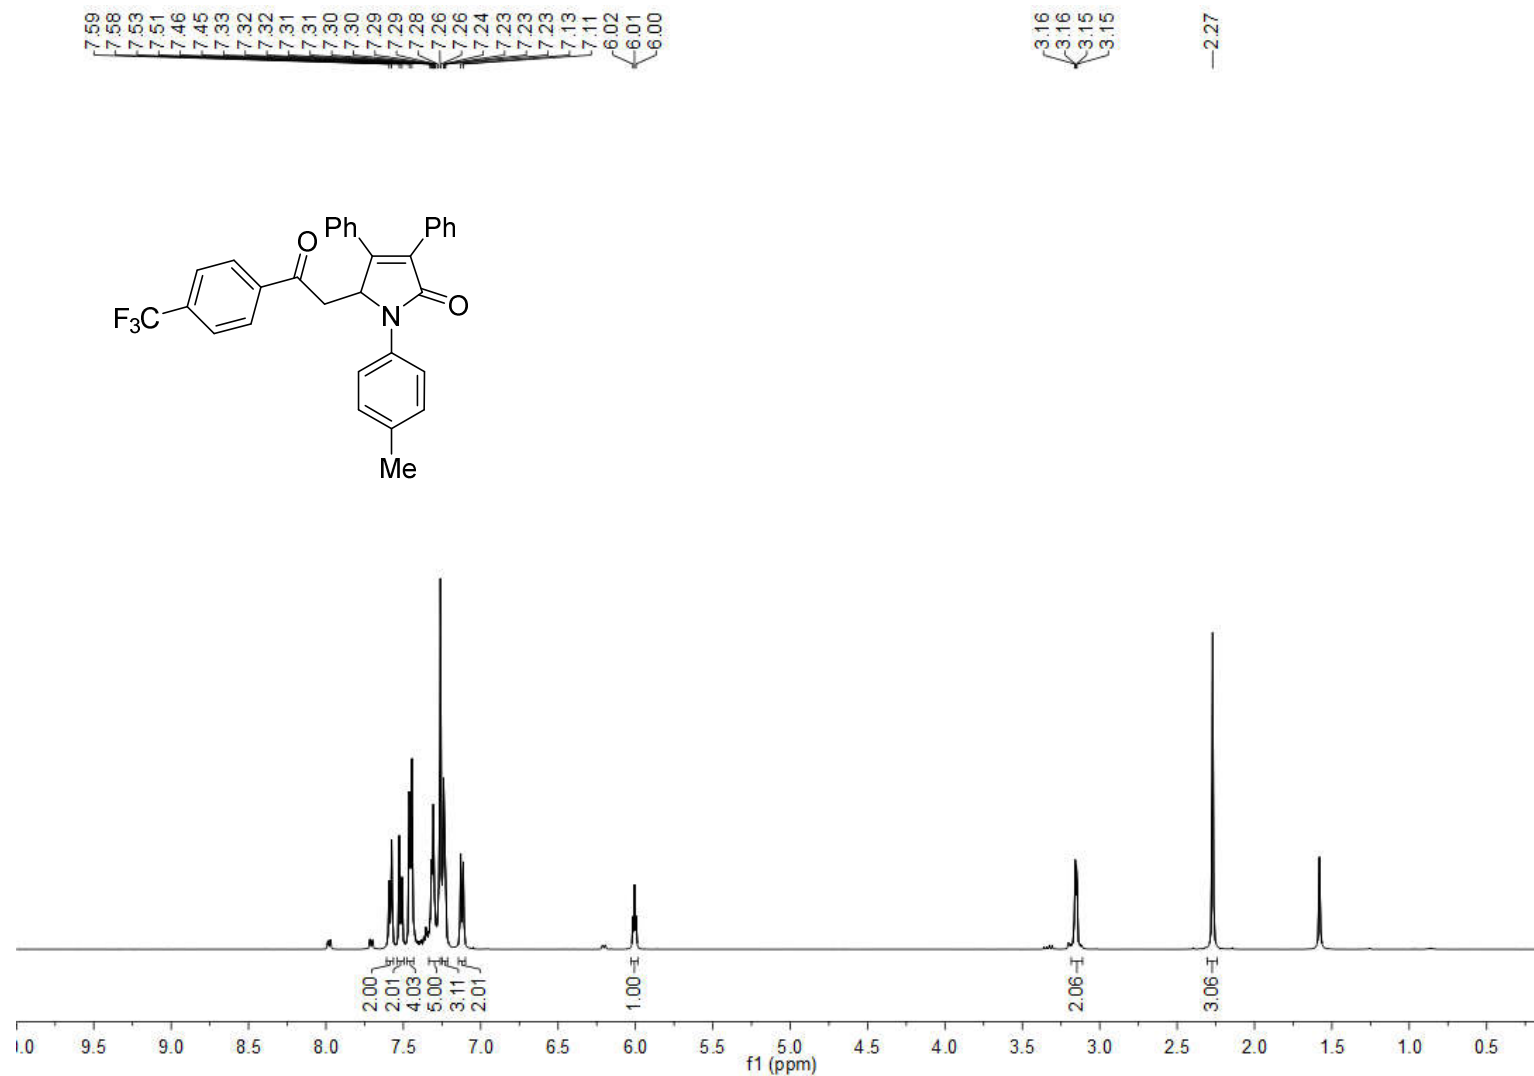

**Figure S100.** <sup>1</sup>H NMR (500 MHz, CDCl<sub>3</sub>) spectra of compound **5r**

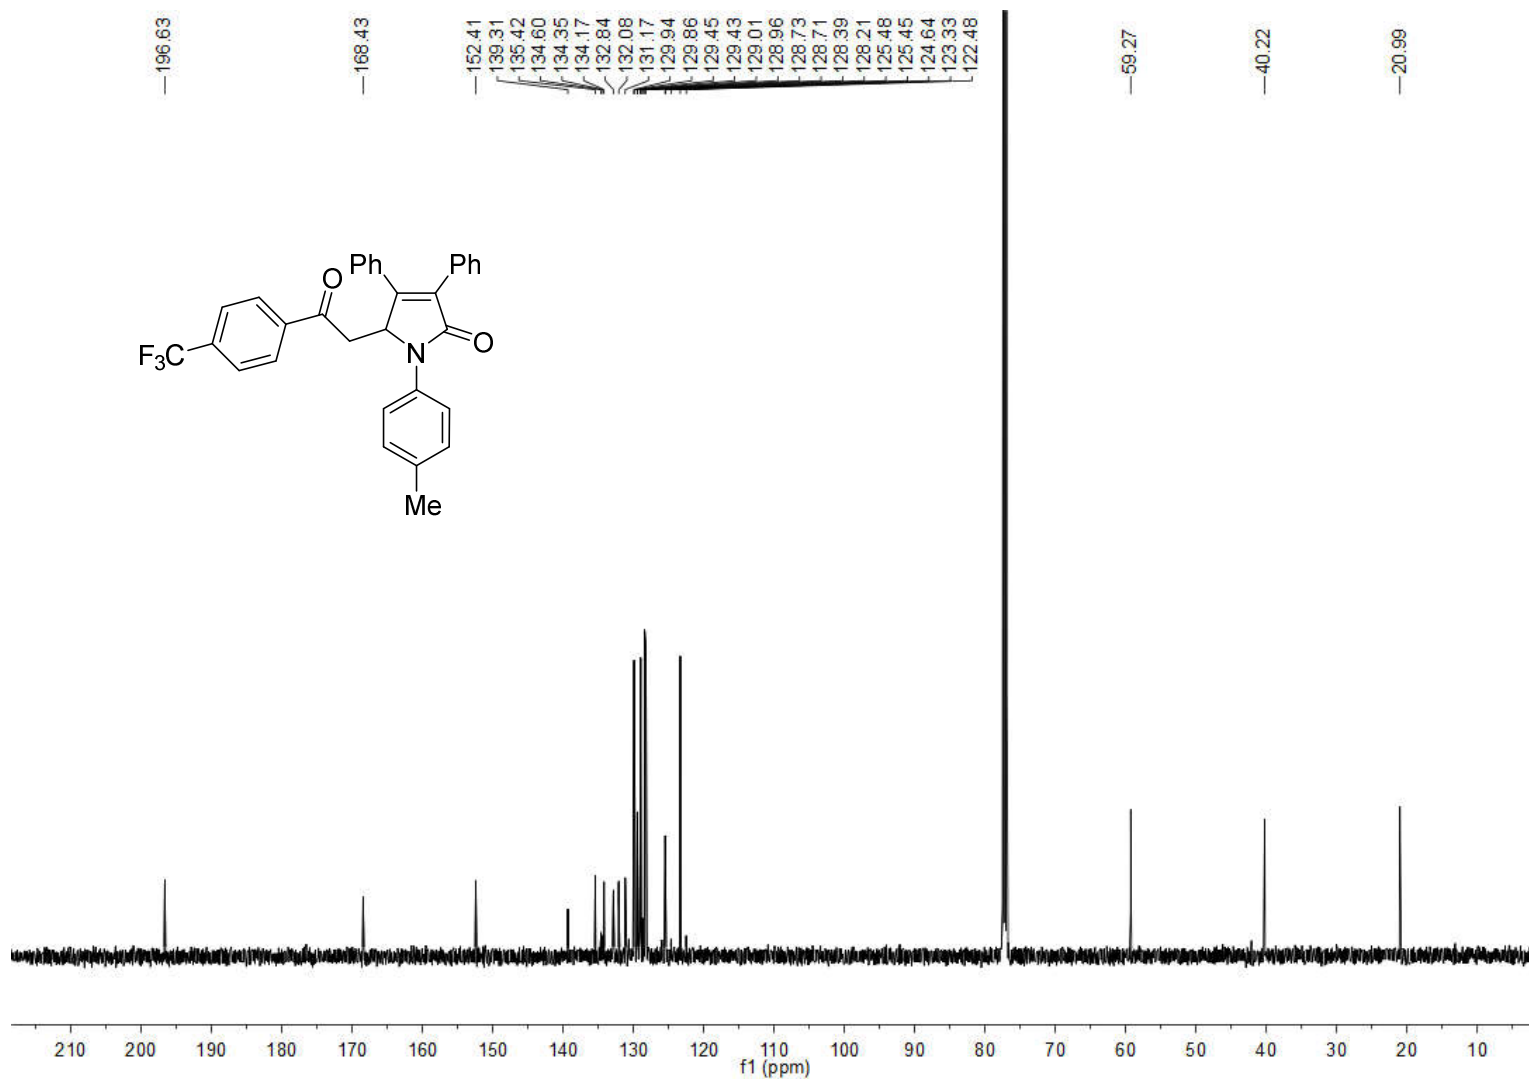

**Figure S101.** <sup>13</sup>C NMR (125 MHz, CDCl<sub>3</sub>) spectra of compound **5r**

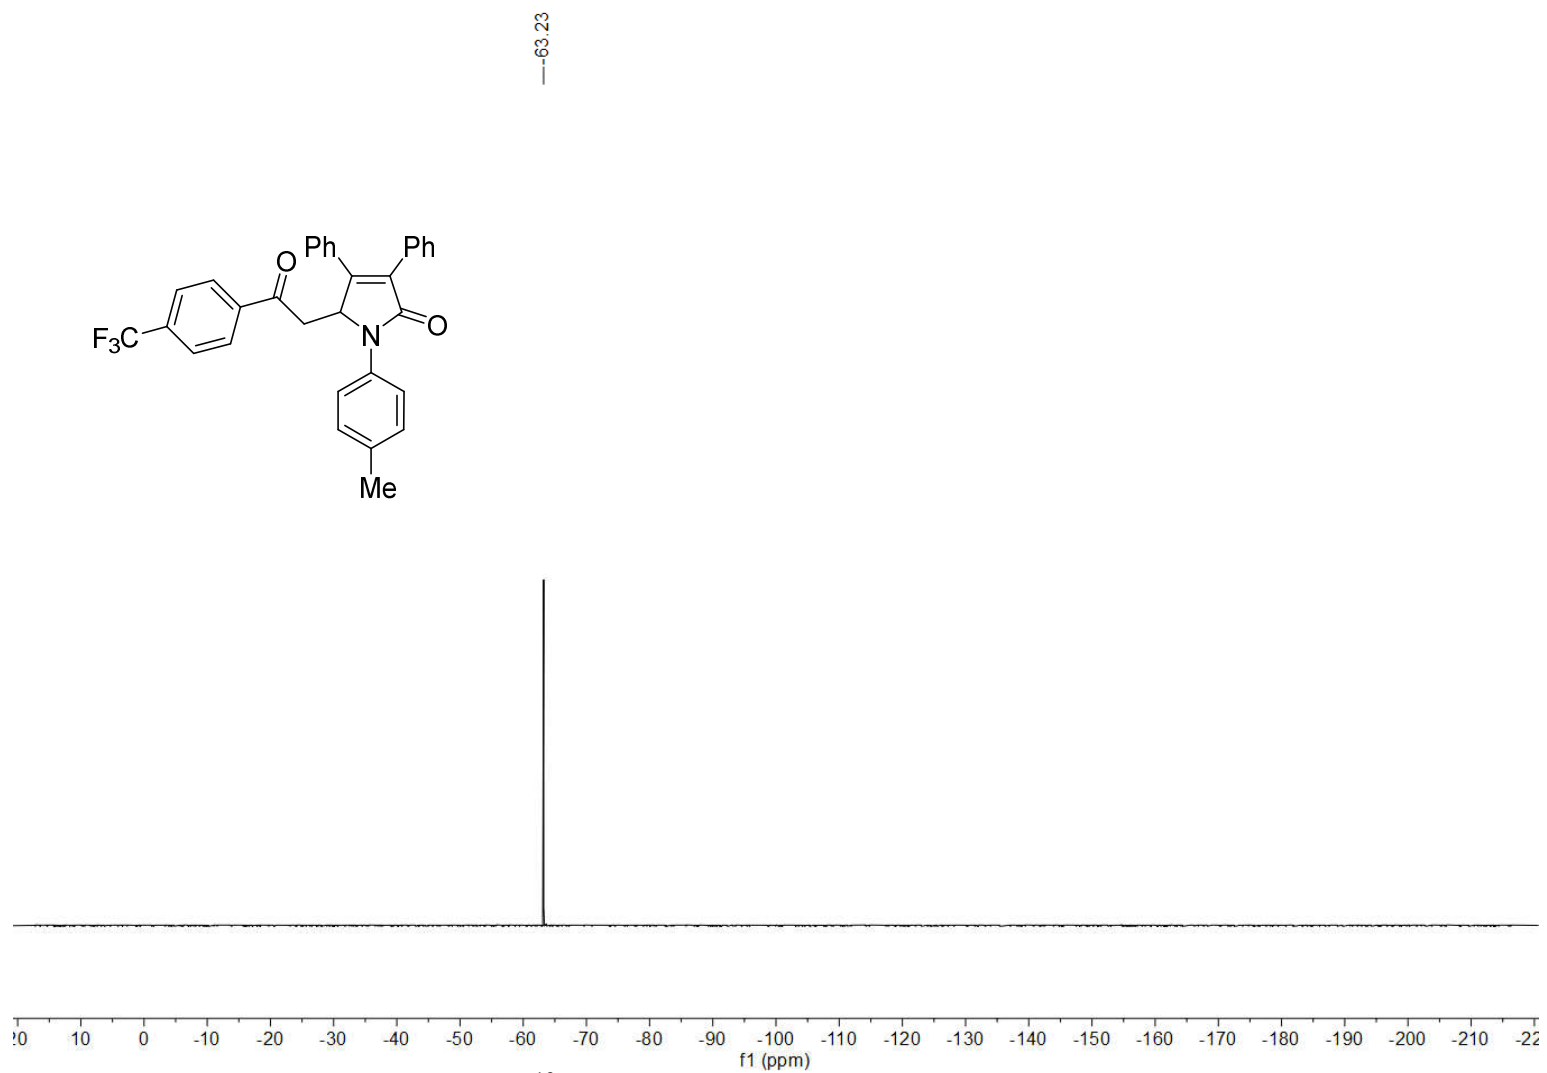

**Figure S102.**  $^{19}\text{F}$  NMR (470 MHz,  $\text{CDCl}_3$ ) spectra of compound **5r**

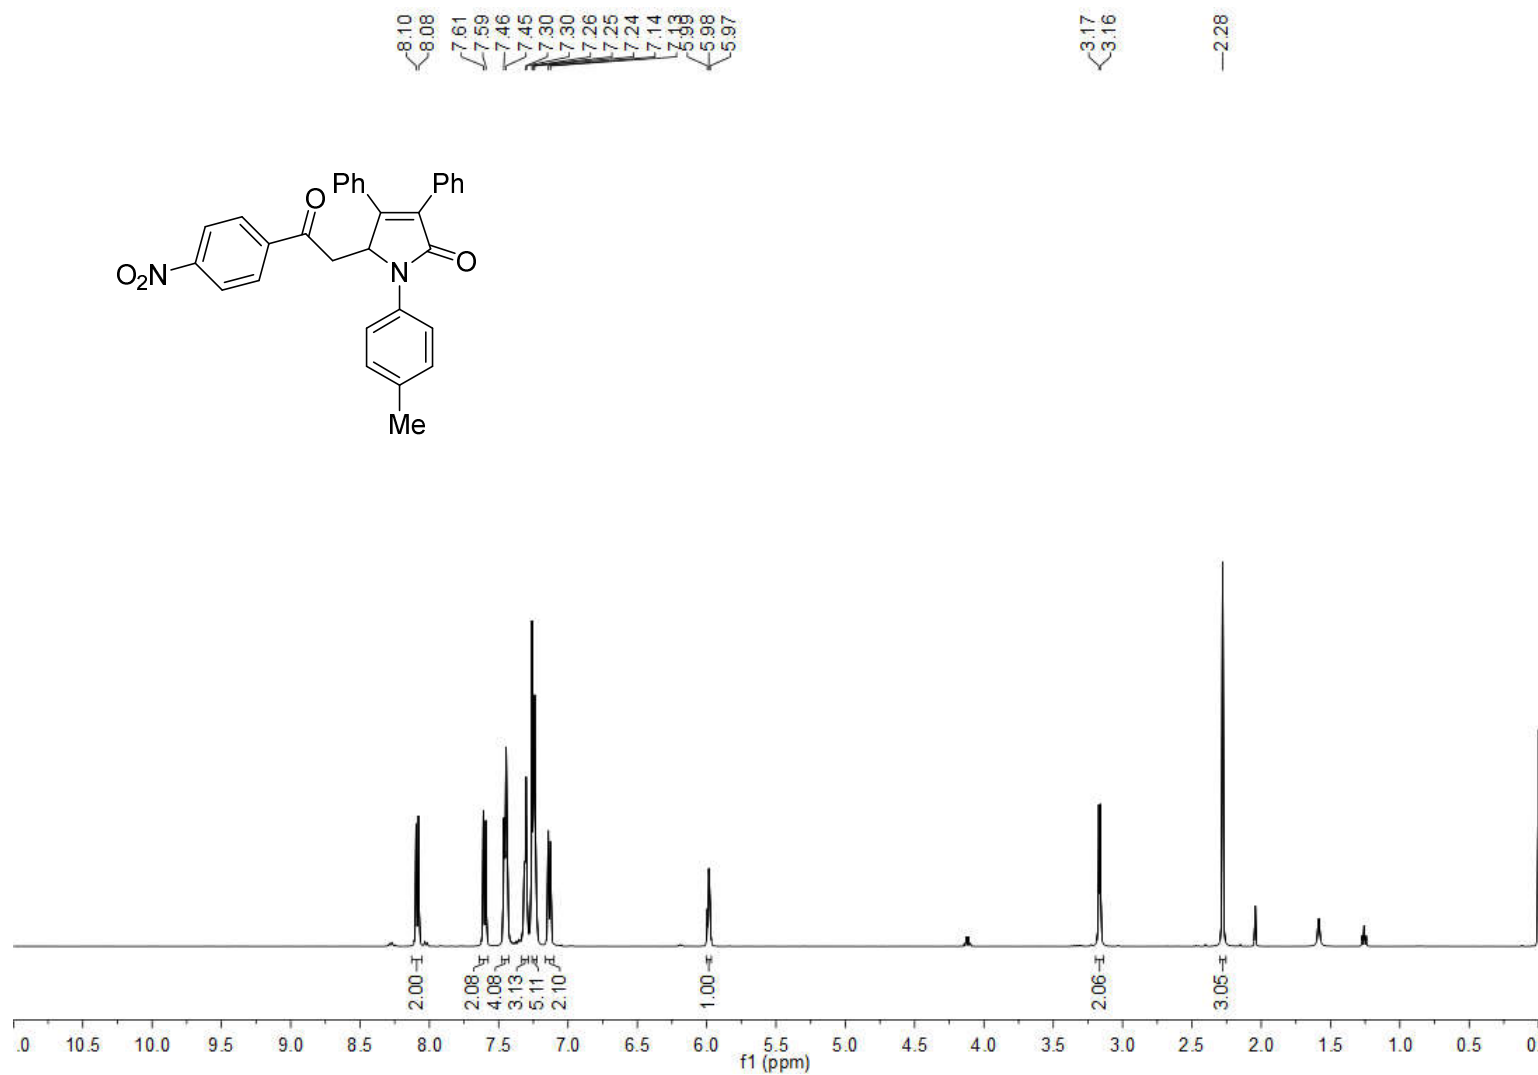

**Figure S103.** <sup>1</sup>H NMR (500 MHz, CDCl<sub>3</sub>) spectra of compound **5s**

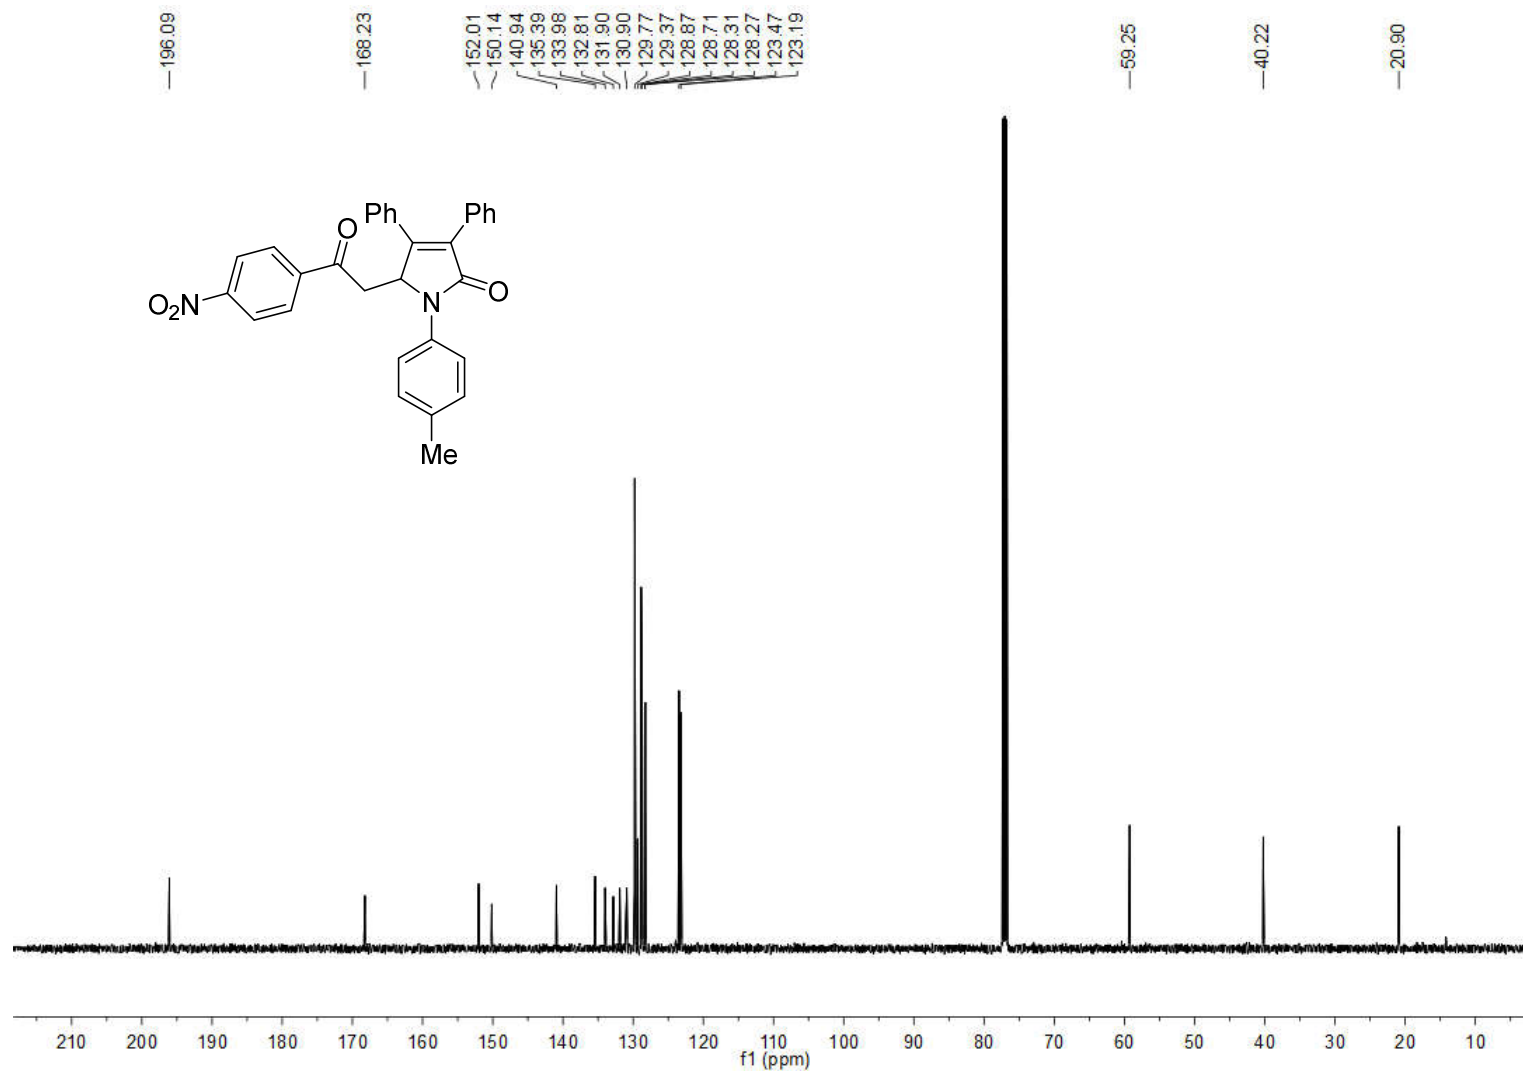

Figure S104. <sup>13</sup>C NMR (125 MHz, CDCl<sub>3</sub>) spectra of compound 5s

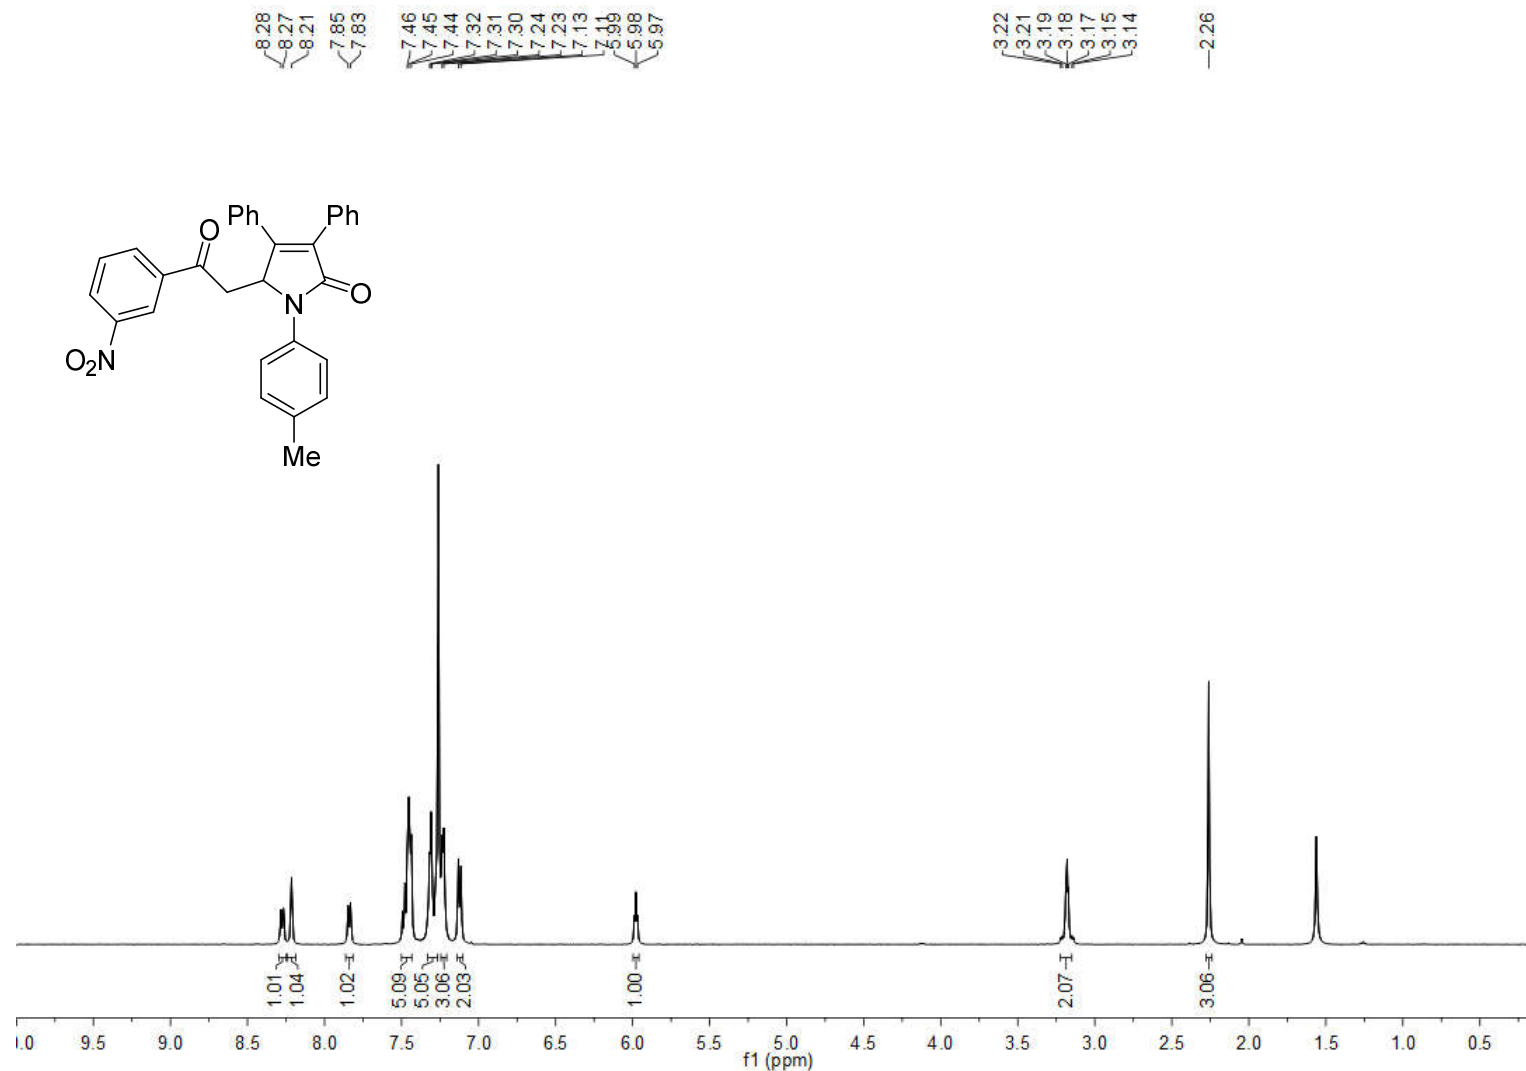

Figure S105. <sup>1</sup>H NMR (500 MHz, CDCl<sub>3</sub>) spectra of compound 5t

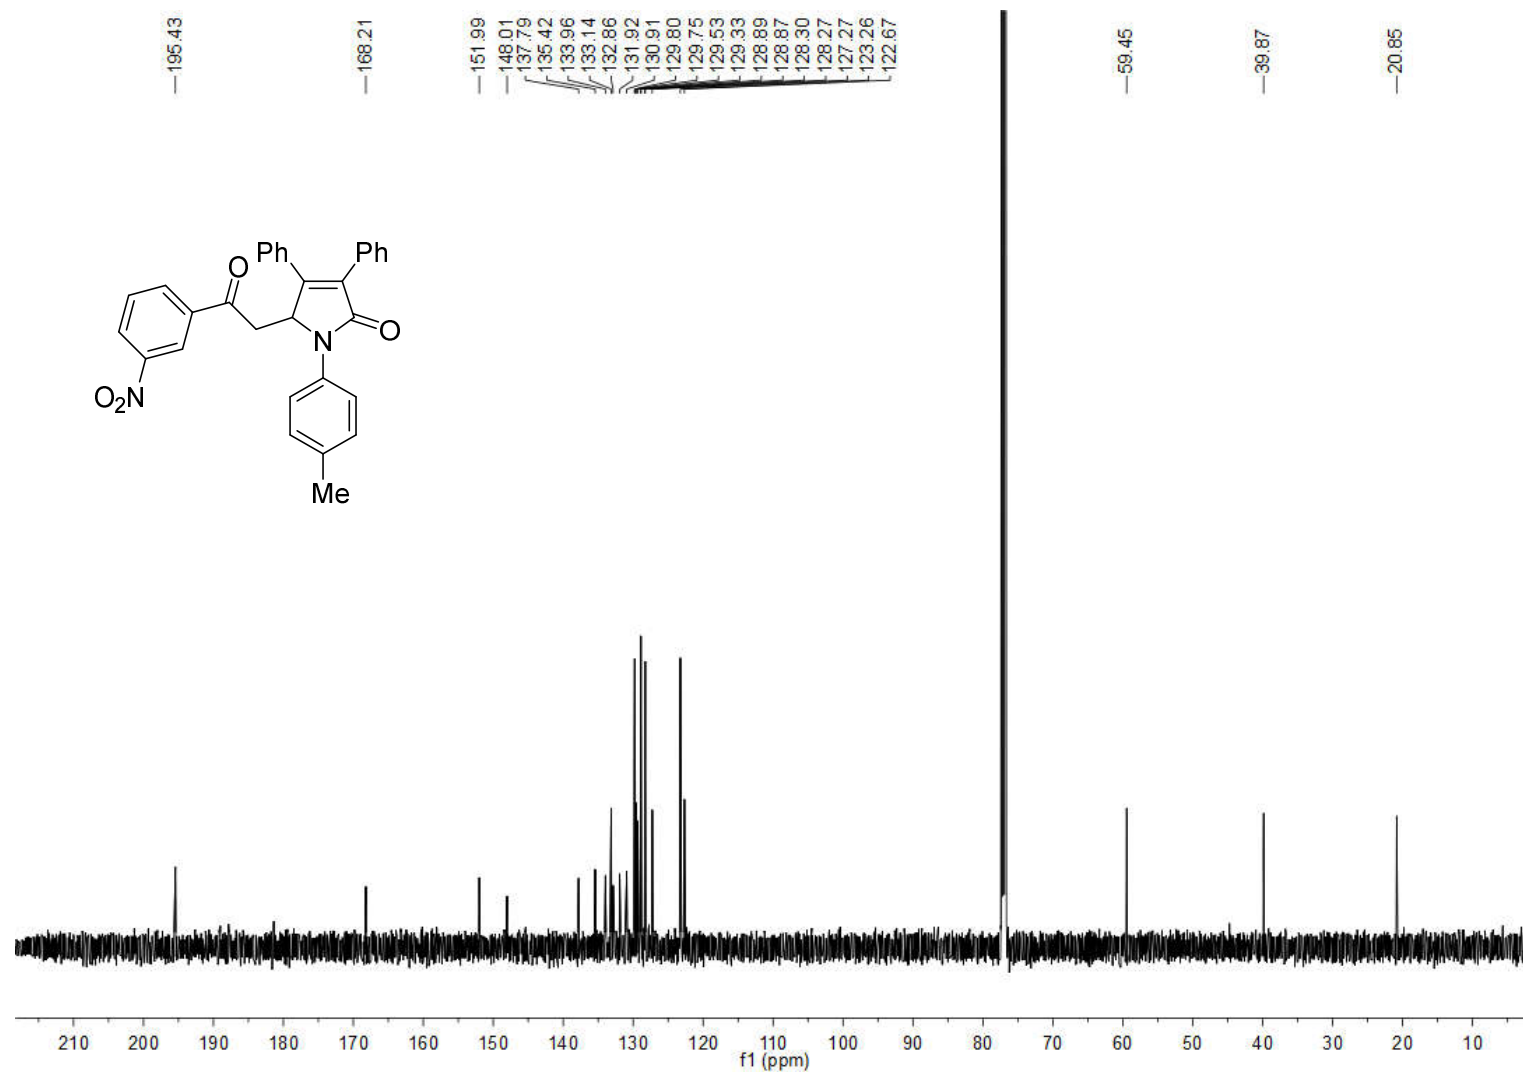

Figure S106. <sup>13</sup>C NMR (125 MHz, CDCl<sub>3</sub>) spectra of compound 5t

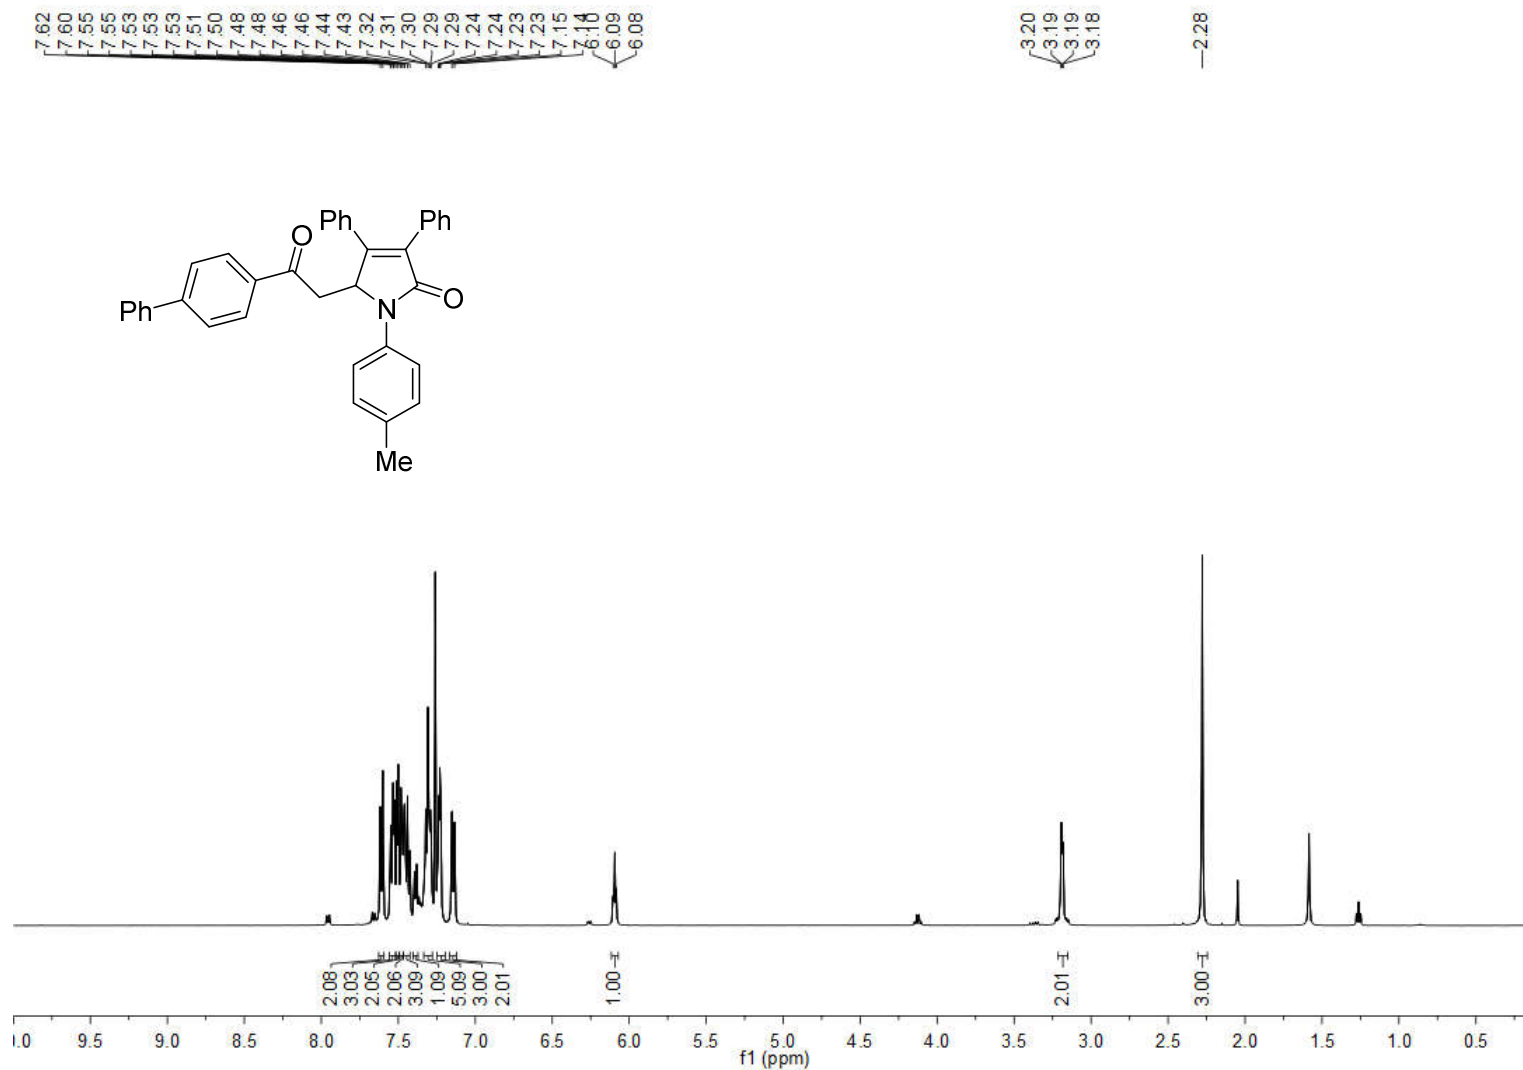

Figure S107. <sup>1</sup>H NMR (500 MHz, CDCl<sub>3</sub>) spectra of compound **5u**



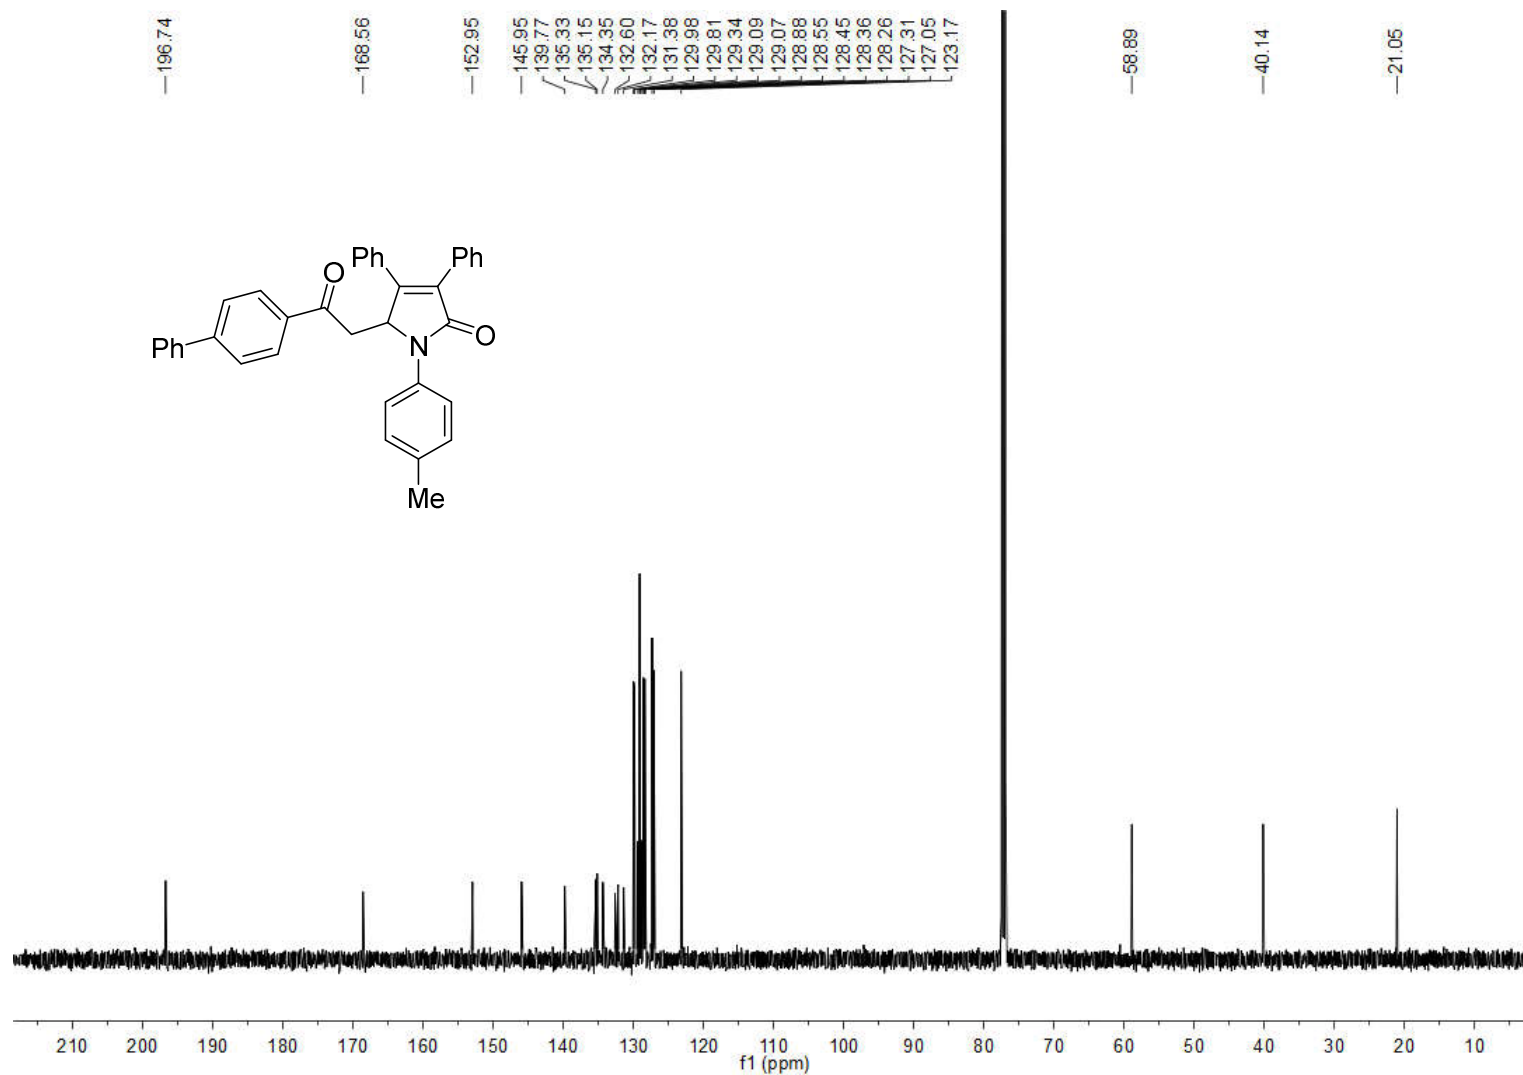

Figure S108. <sup>13</sup>C NMR (125 MHz, CDCl<sub>3</sub>) spectra of compound 5u

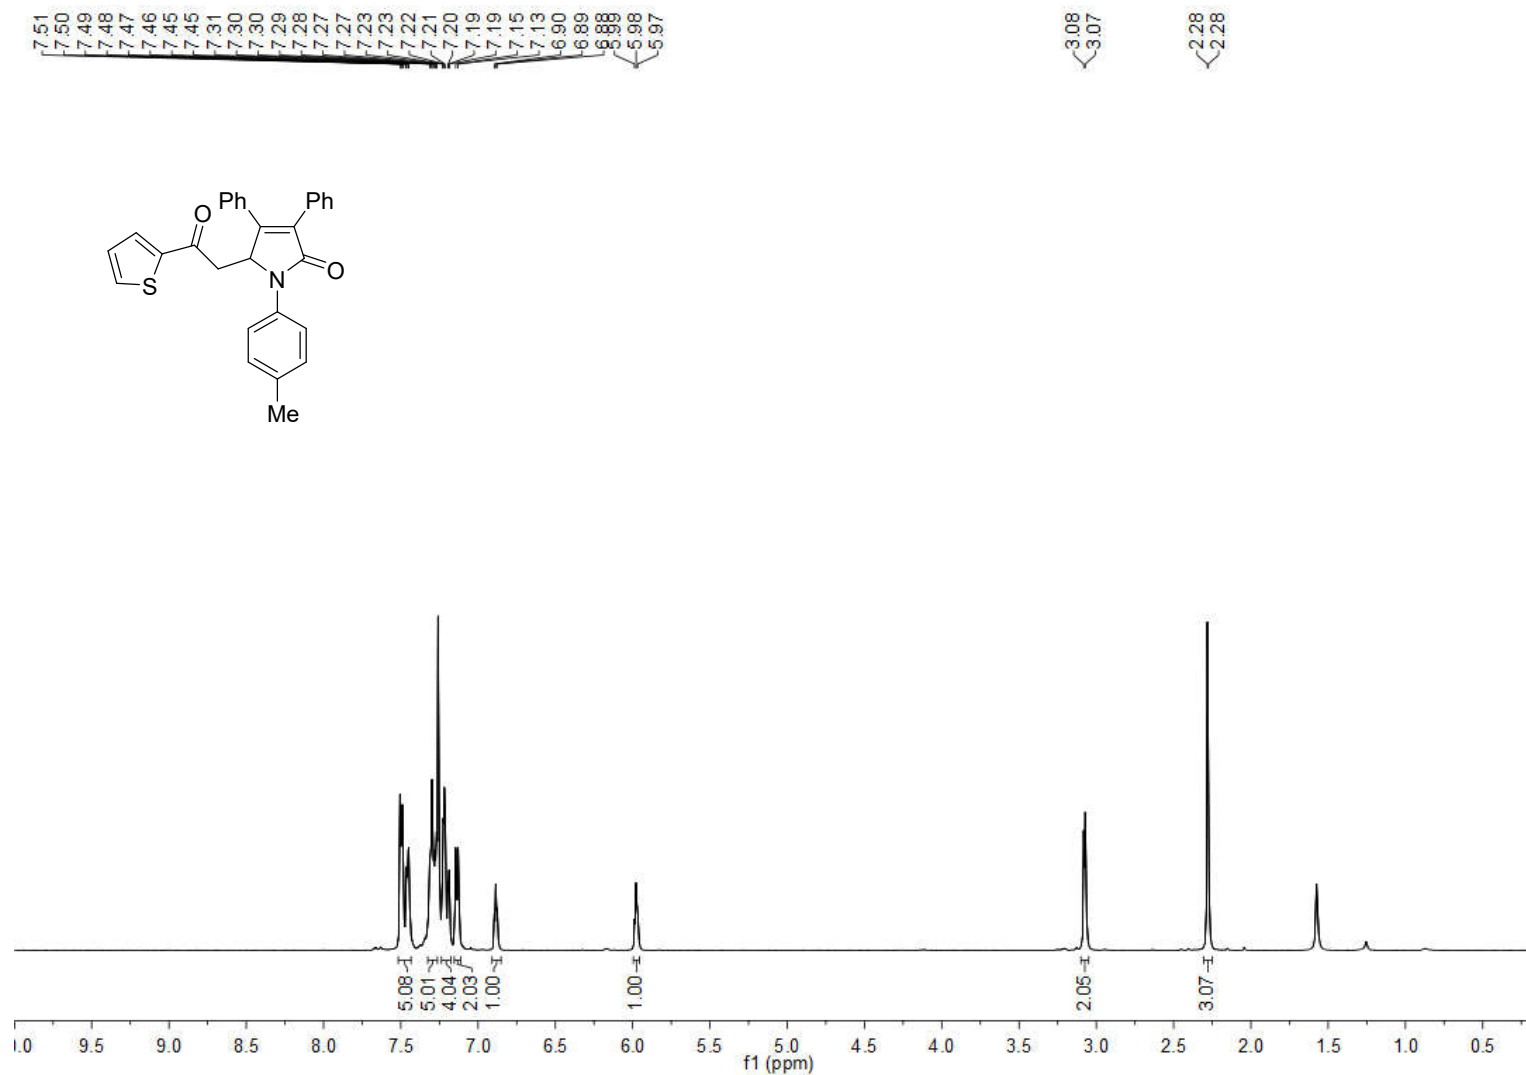

**Figure S109.**  $^1\text{H}$  NMR (500 MHz,  $\text{CDCl}_3$ ) spectra of compound **5v**

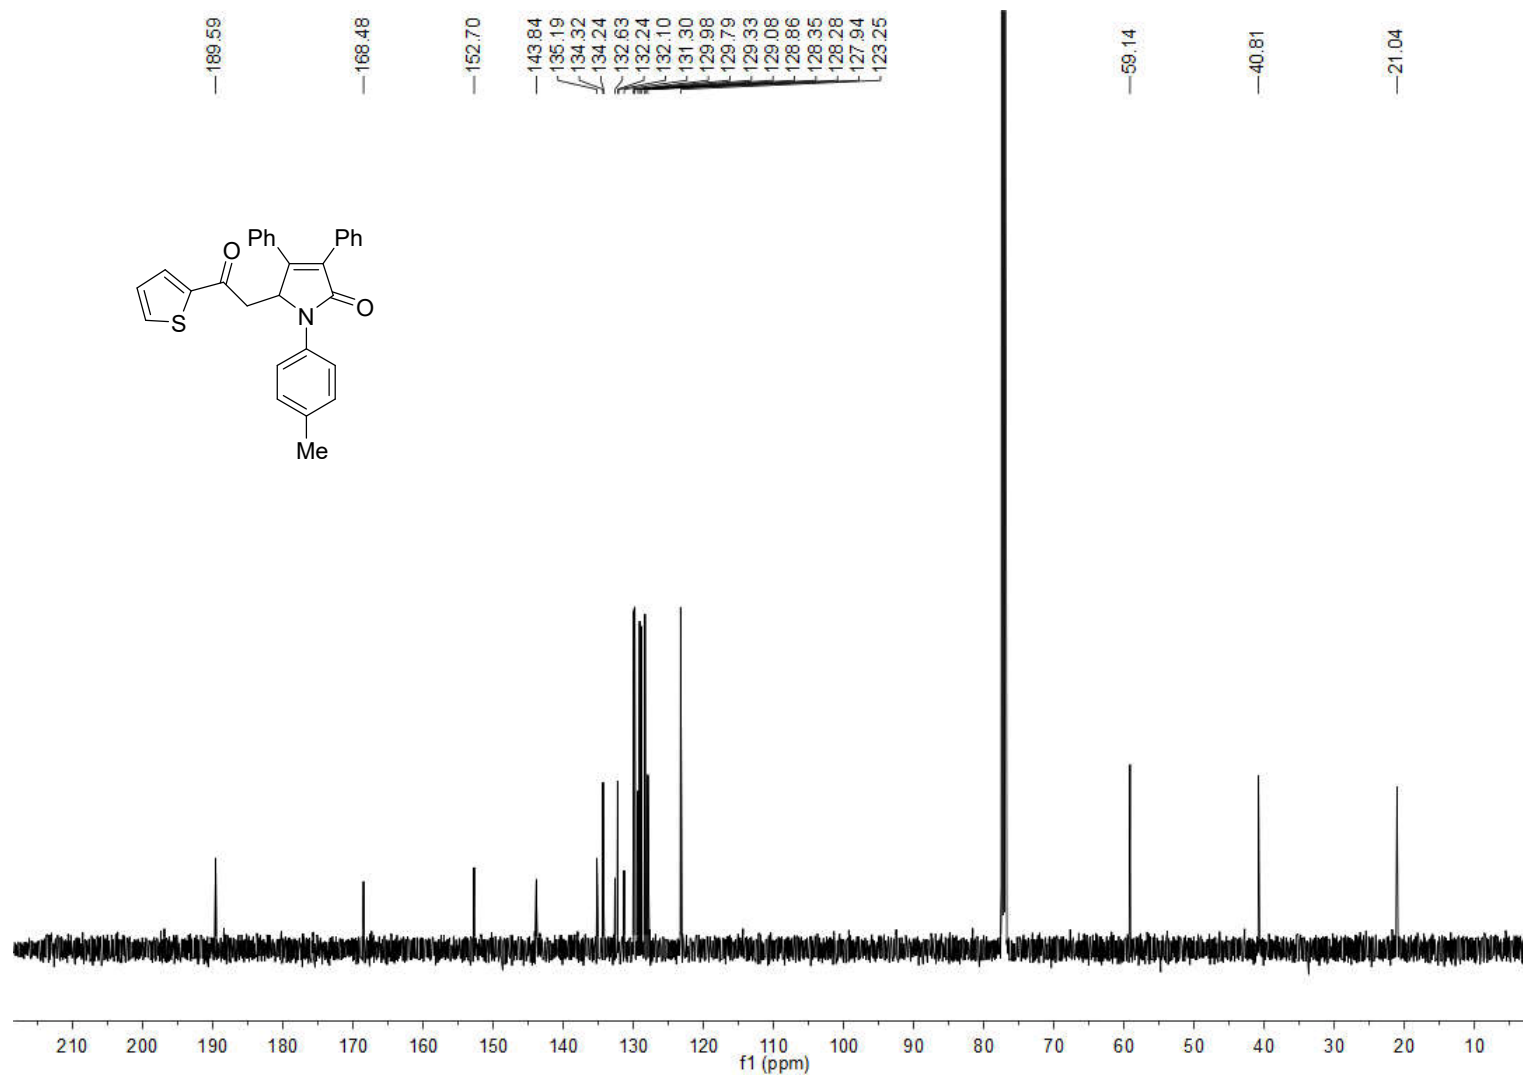

Figure S110. <sup>13</sup>C NMR (125 MHz, CDCl<sub>3</sub>) spectra of compound 5v

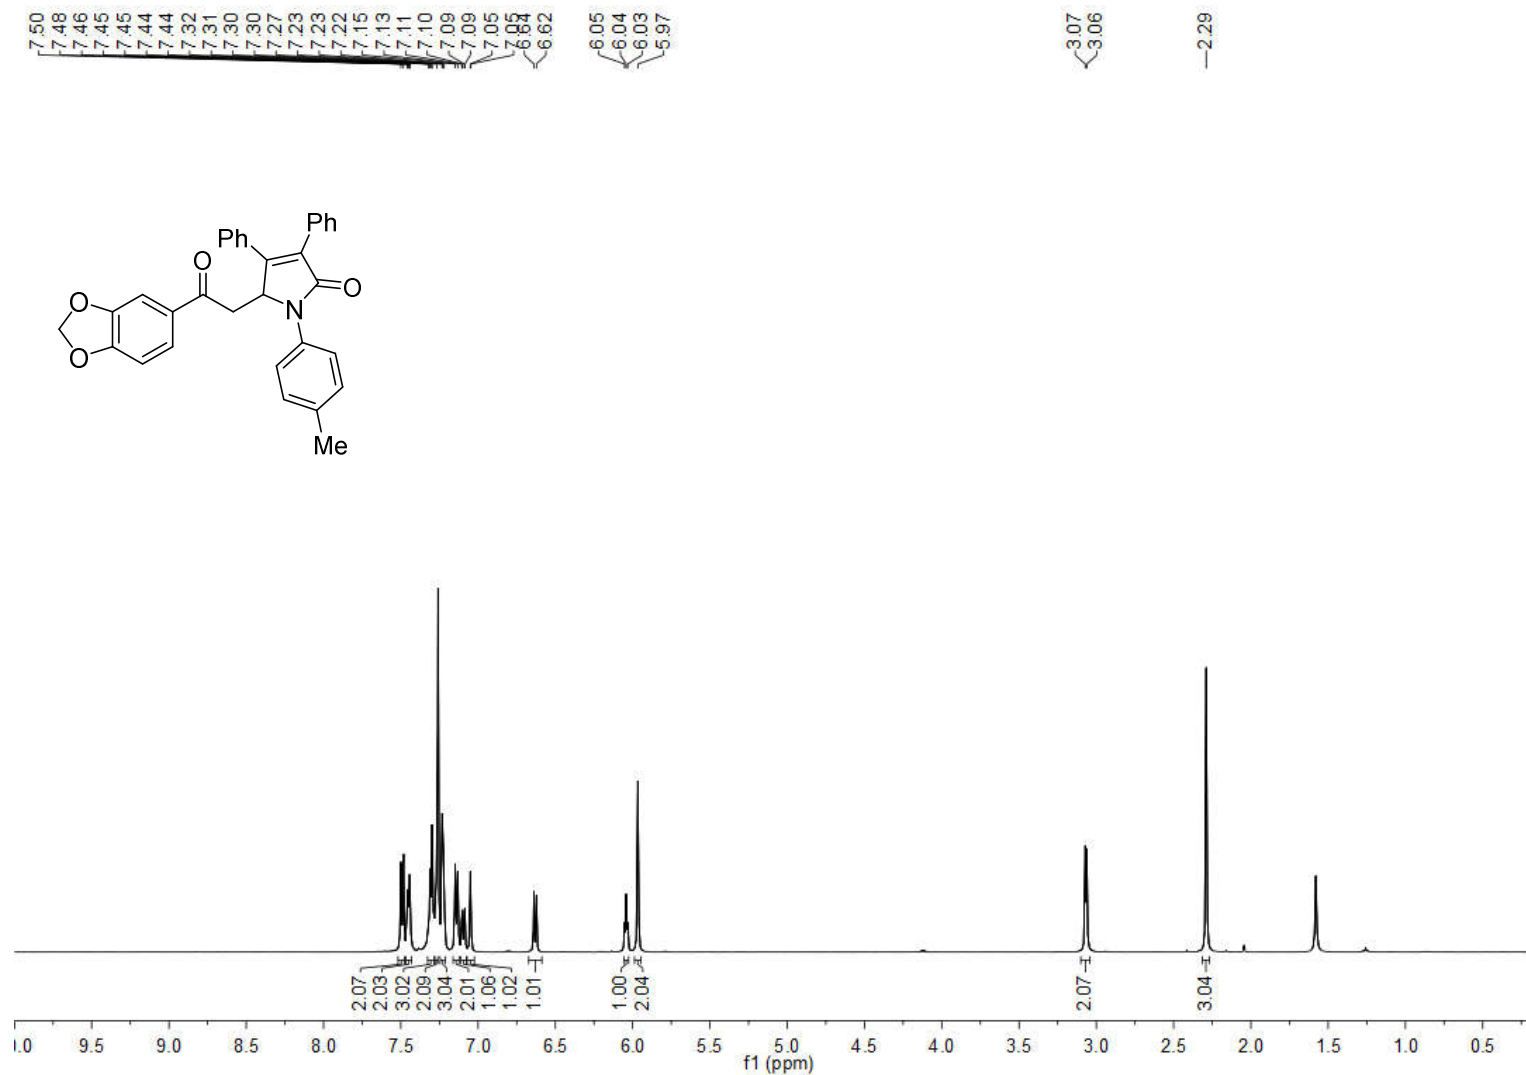

**Figure S111.** <sup>1</sup>H NMR (500 MHz, CDCl<sub>3</sub>) spectra of compound **5w**

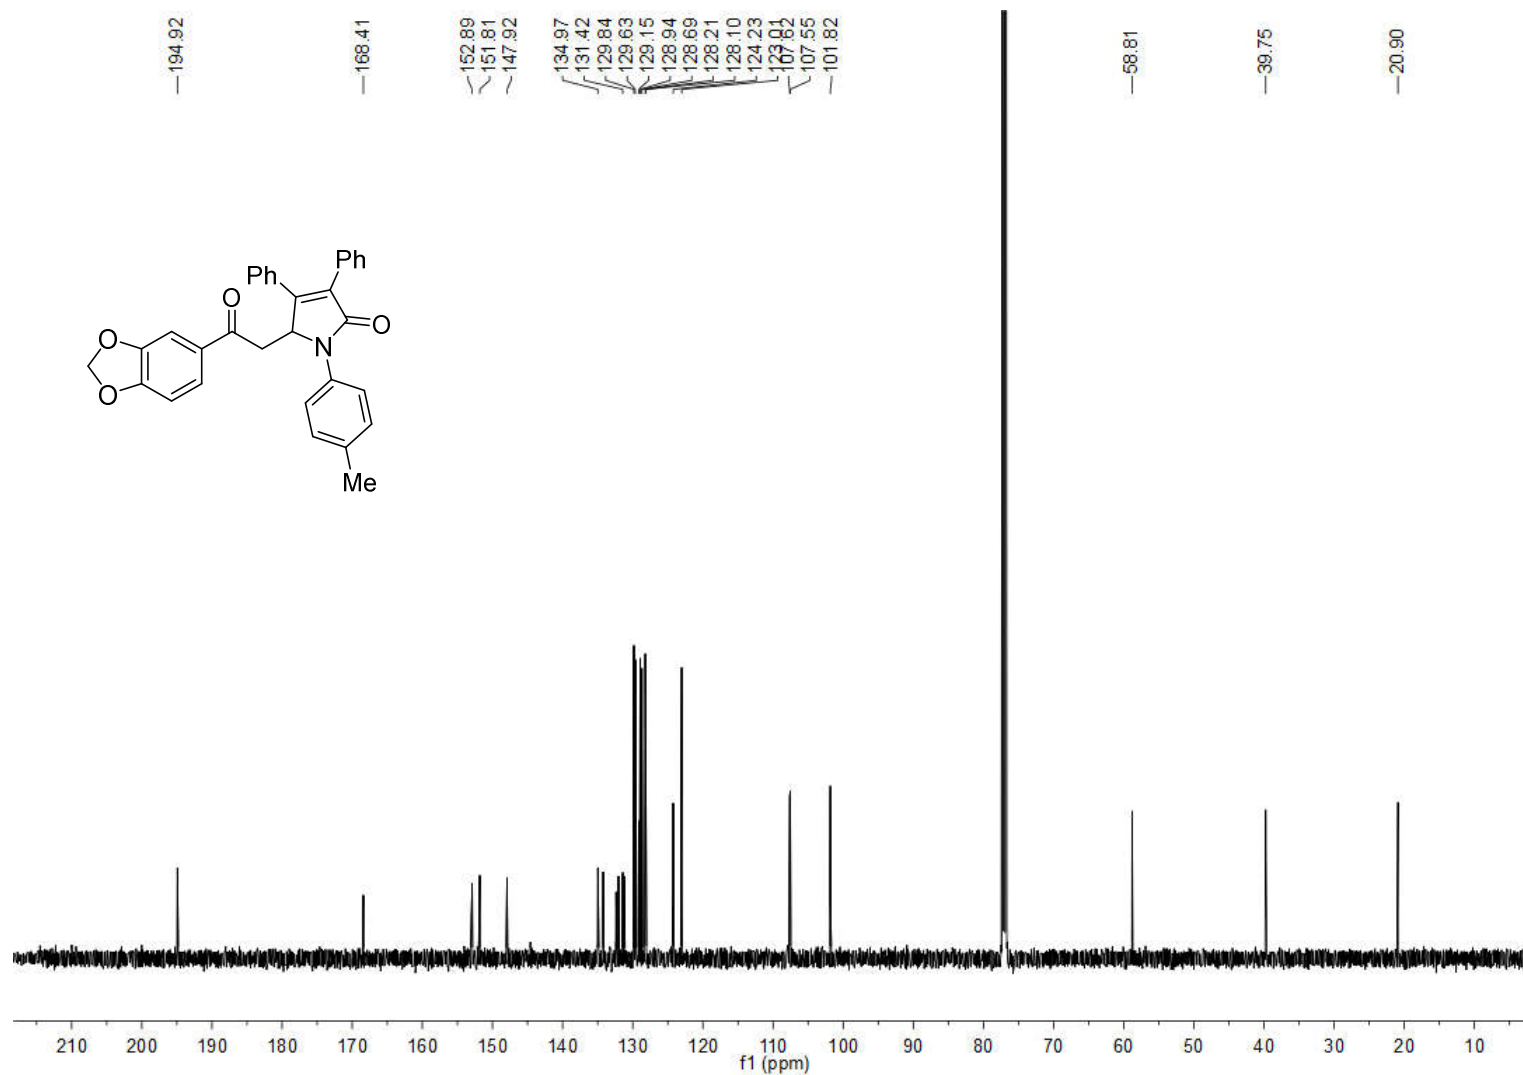

Figure S112. <sup>13</sup>C NMR (125 MHz, CDCl<sub>3</sub>) spectra of compound 5w

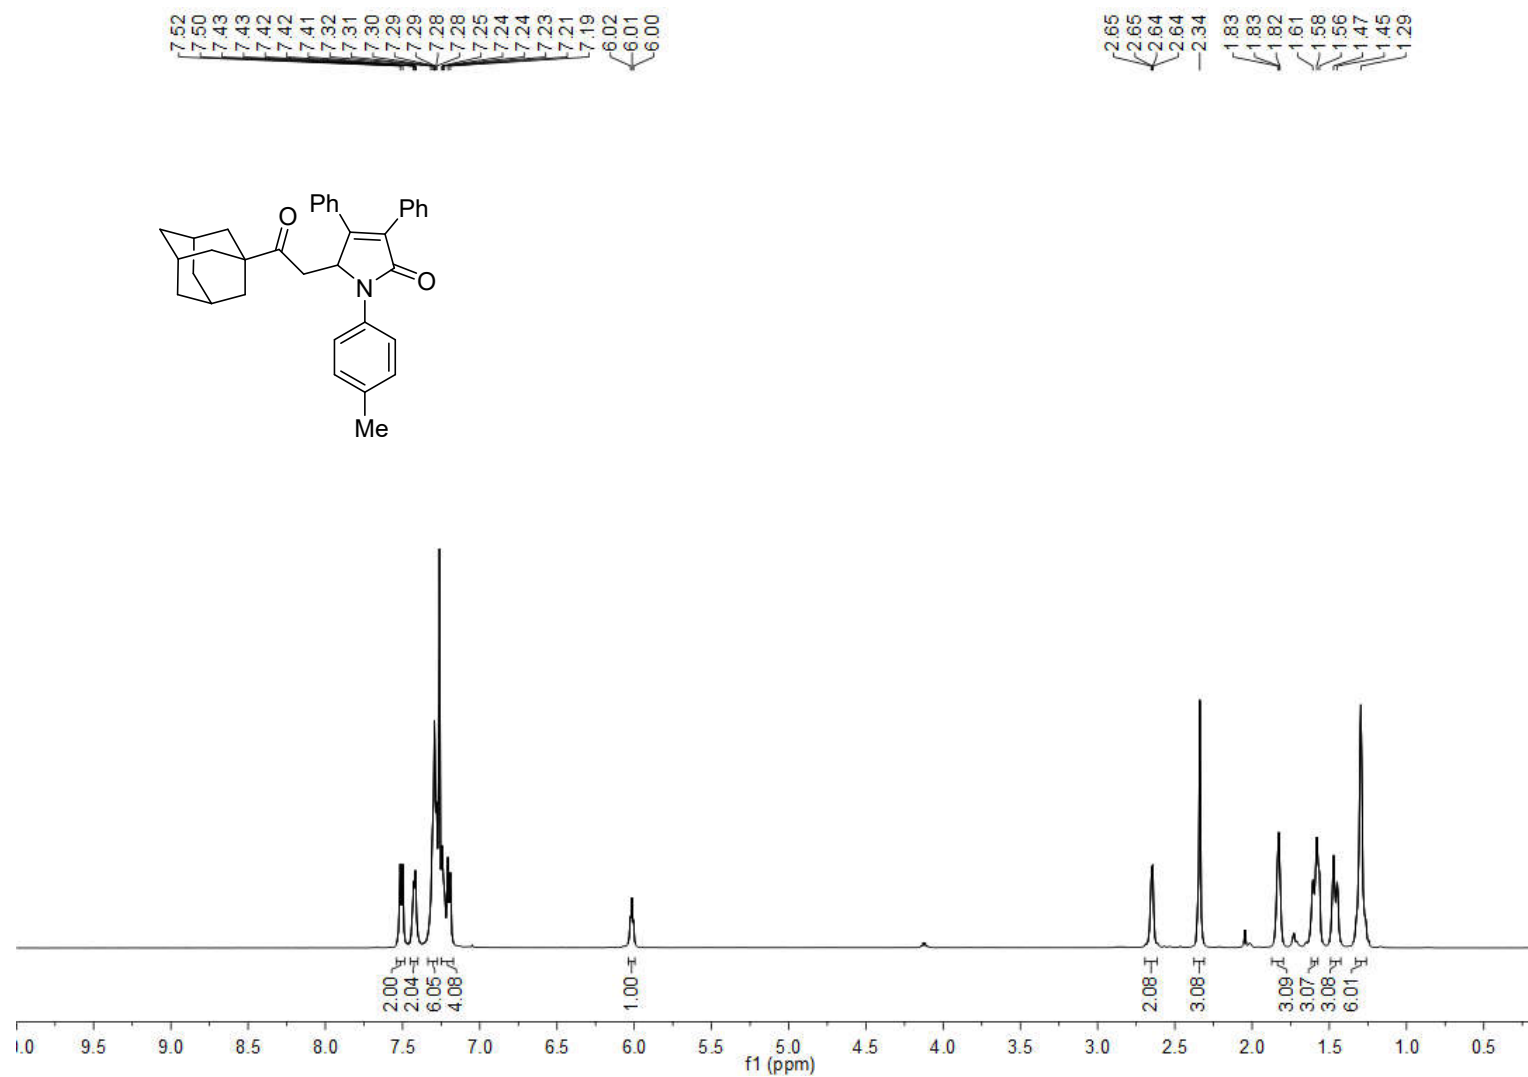

**Figure S113.** <sup>1</sup>H NMR (500 MHz, CDCl<sub>3</sub>) spectra of compound **5x**

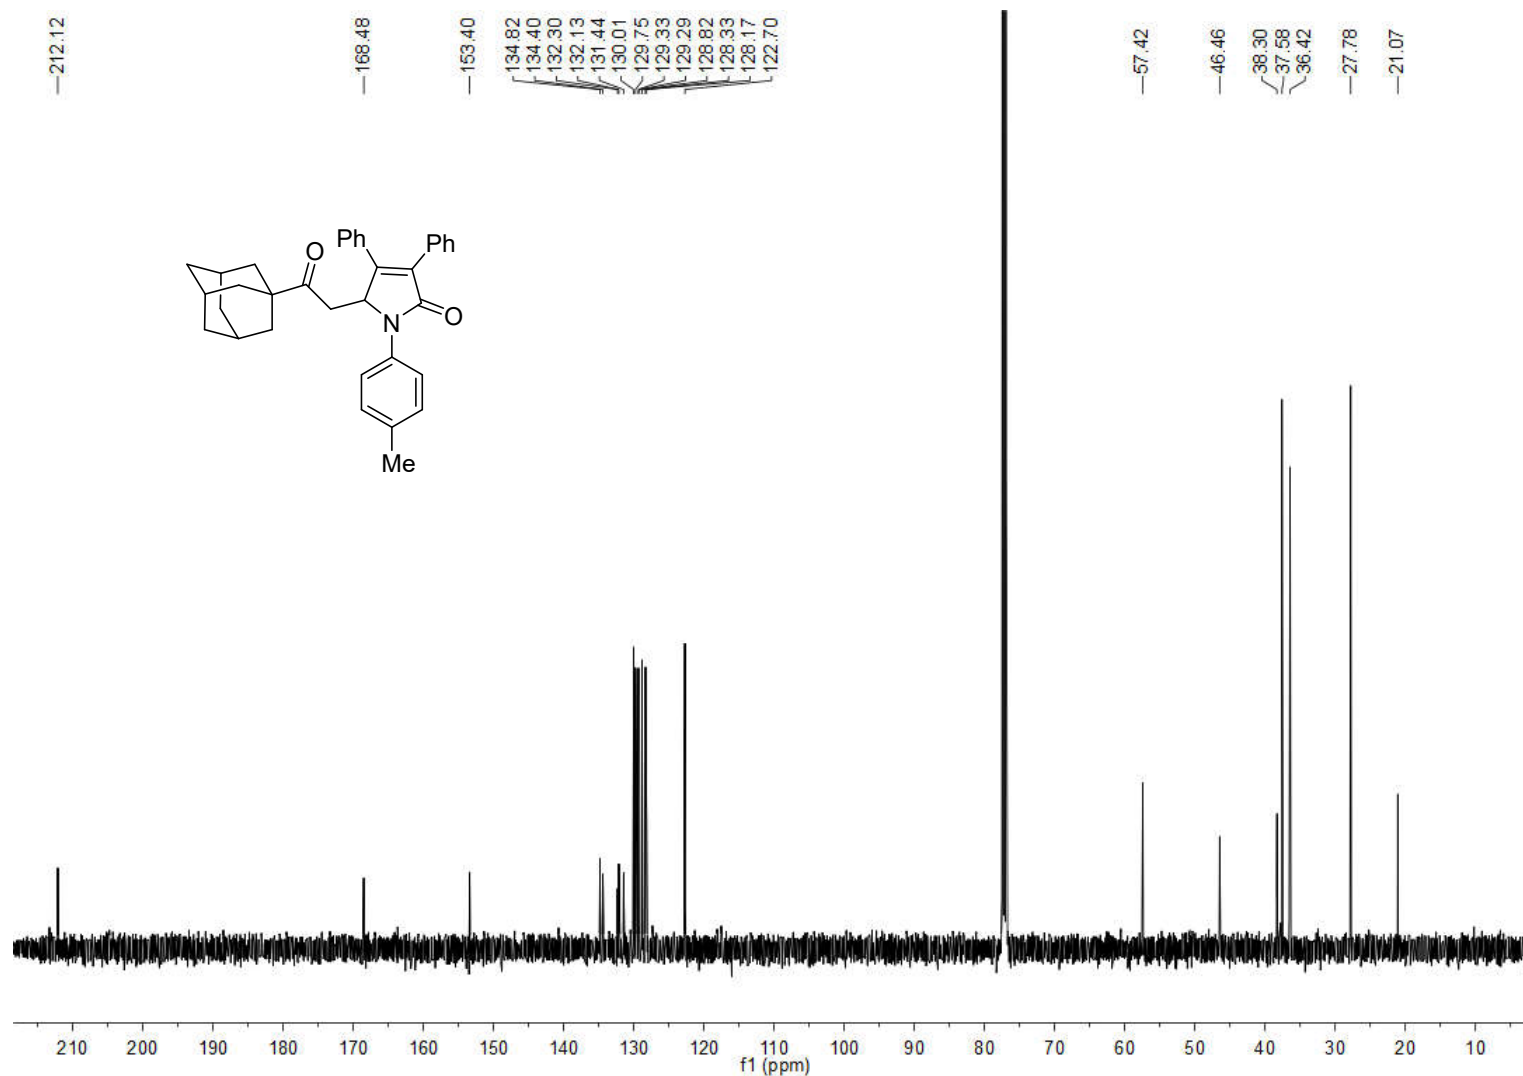

Figure S114.  $^{13}\text{C}$  NMR (125 MHz,  $\text{CDCl}_3$ ) spectra of compound 5x

ZZL-187.1.fid

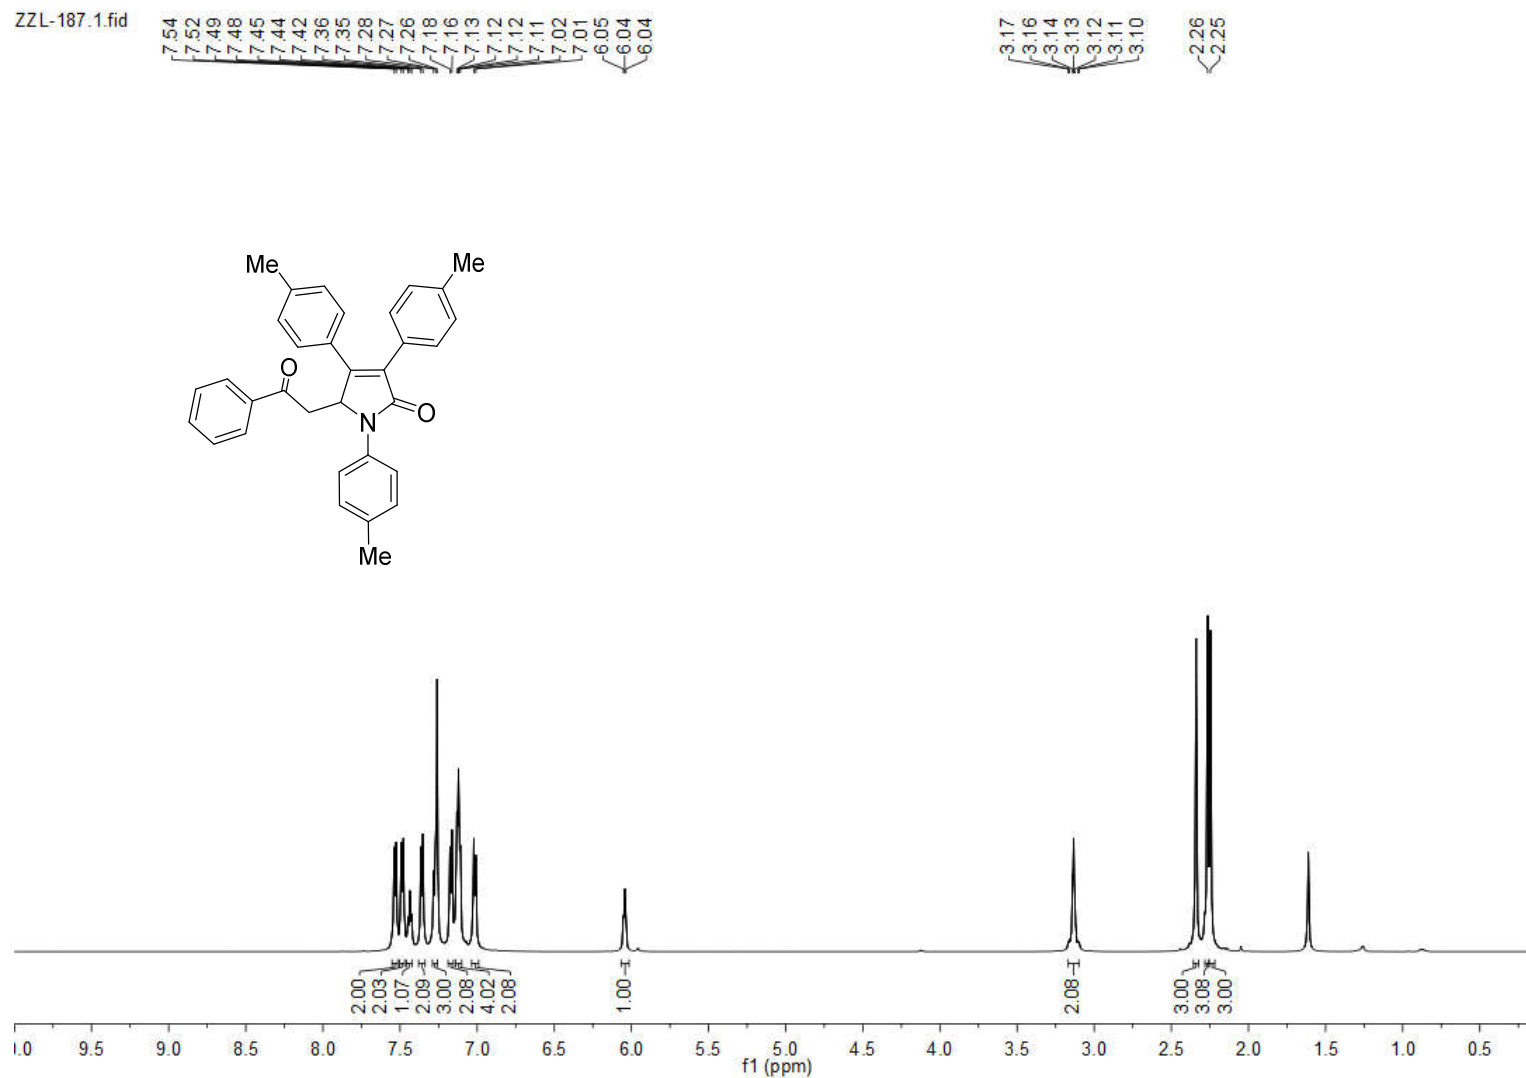

Figure S115. <sup>1</sup>H NMR (600 MHz, CDCl<sub>3</sub>) spectra of compound 5y



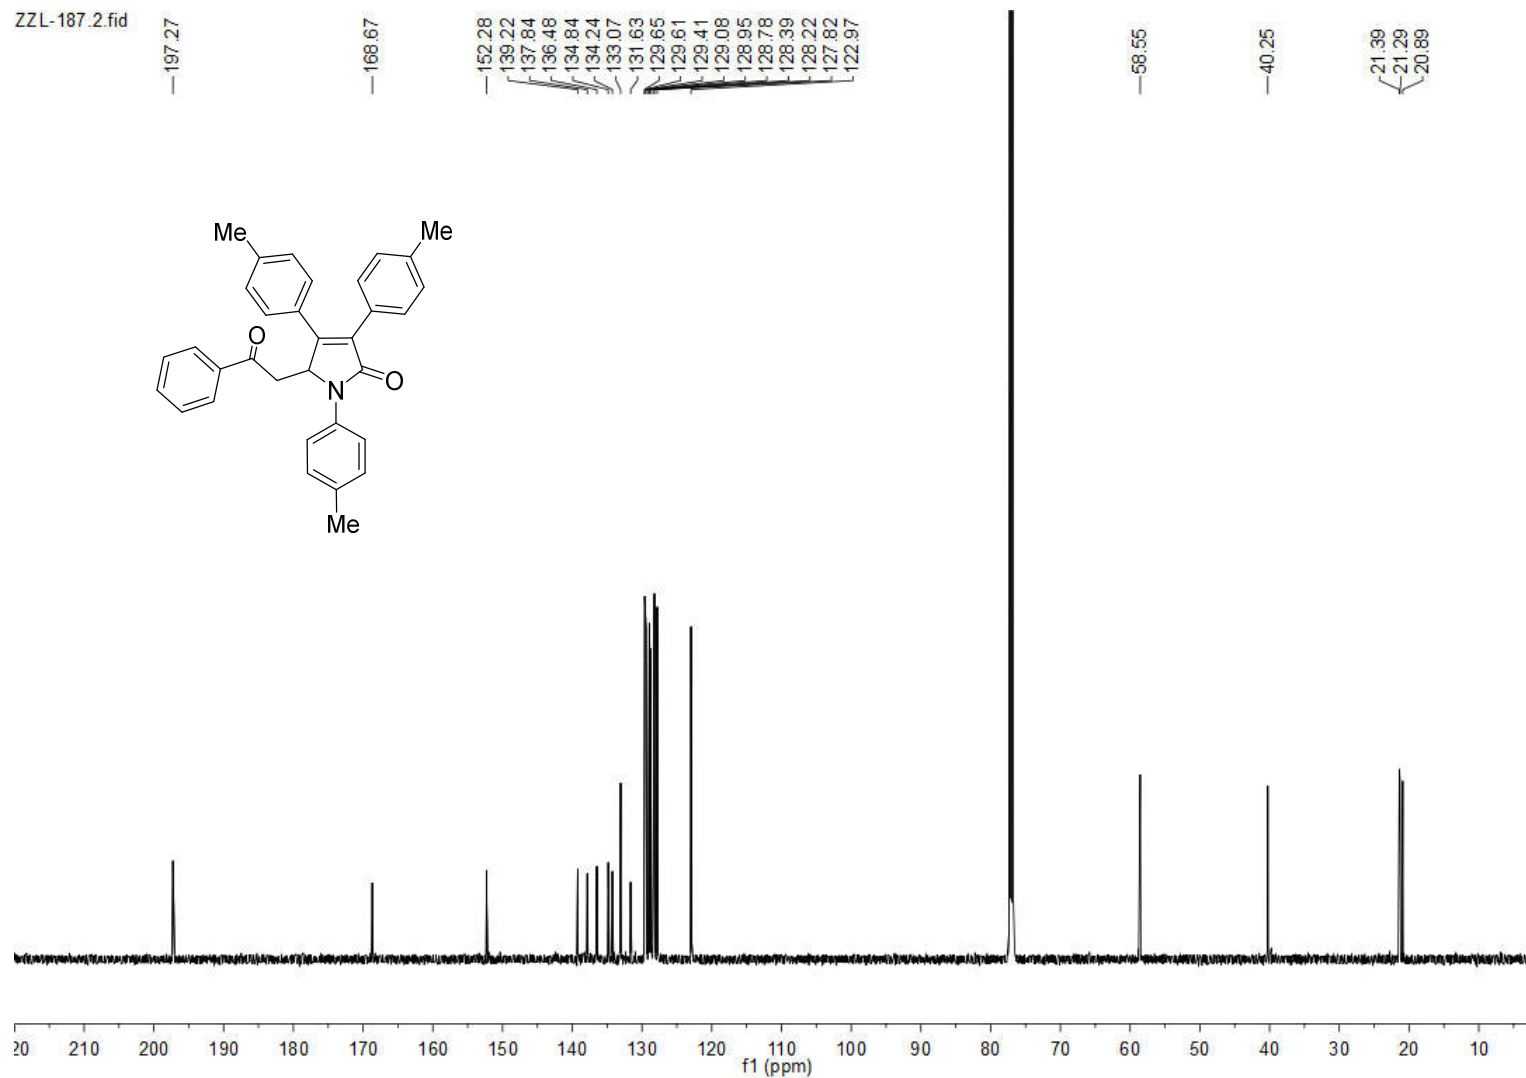

Figure S116.  $^{13}\text{C}$  NMR (150 MHz,  $\text{CDCl}_3$ ) spectra of compound 5y

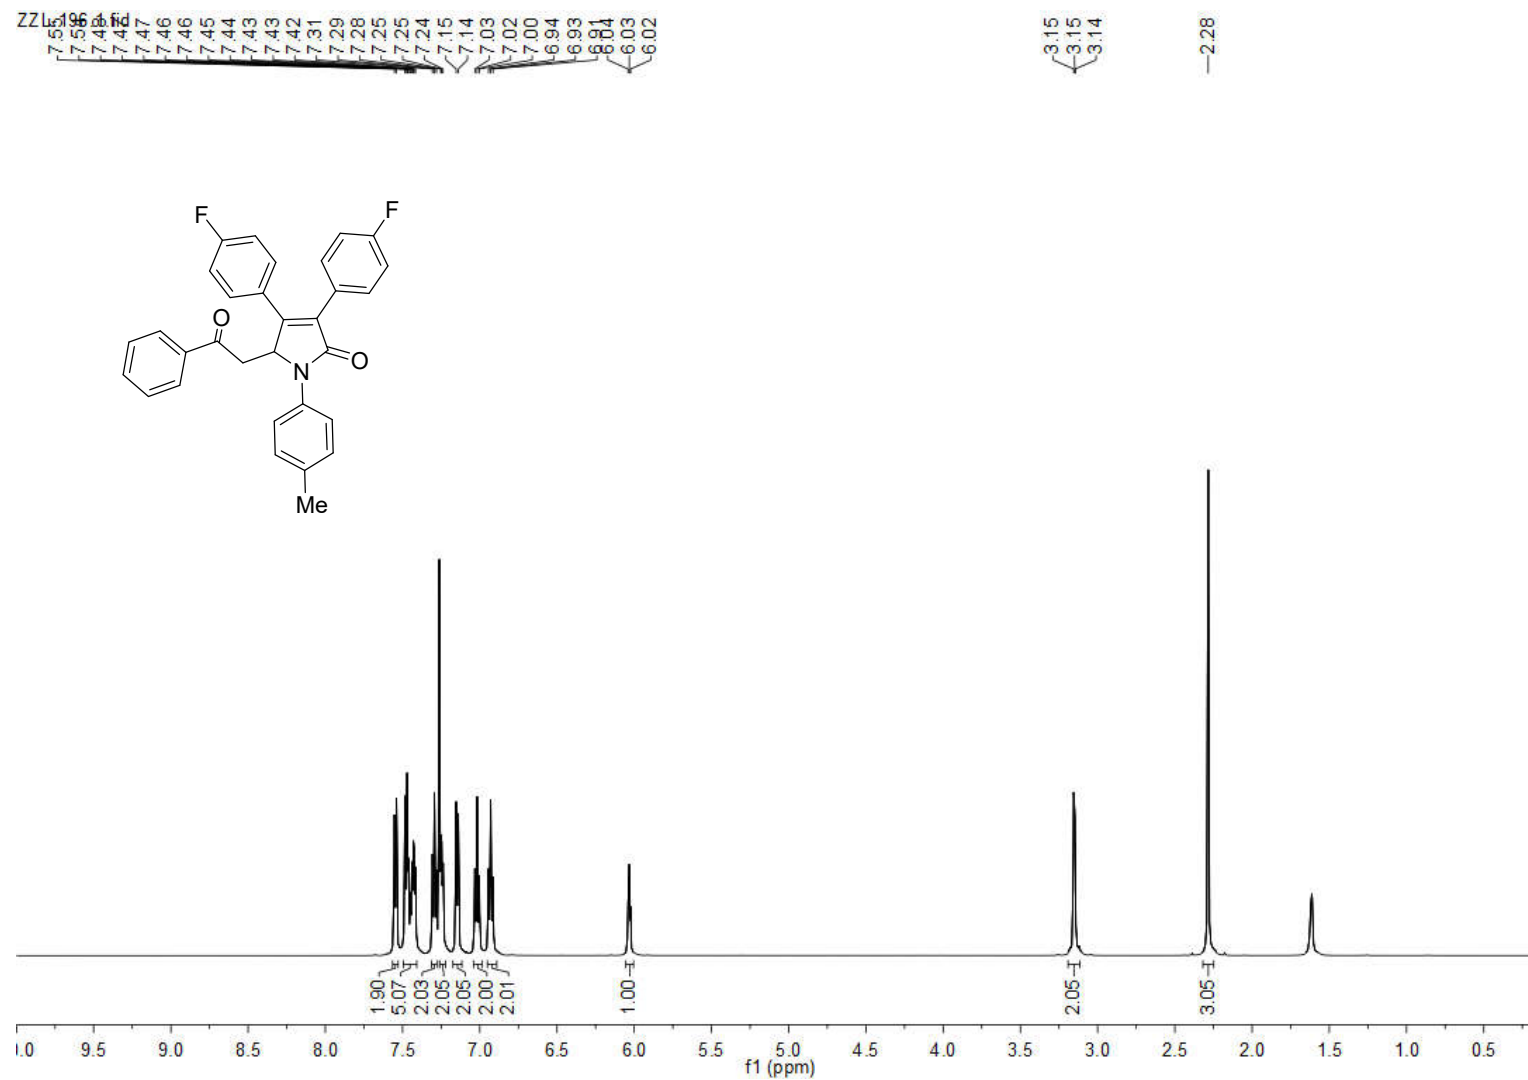

**Figure S117.**  $^1\text{H NMR}$  (600 MHz,  $\text{CDCl}_3$ ) spectra of compound **5z**

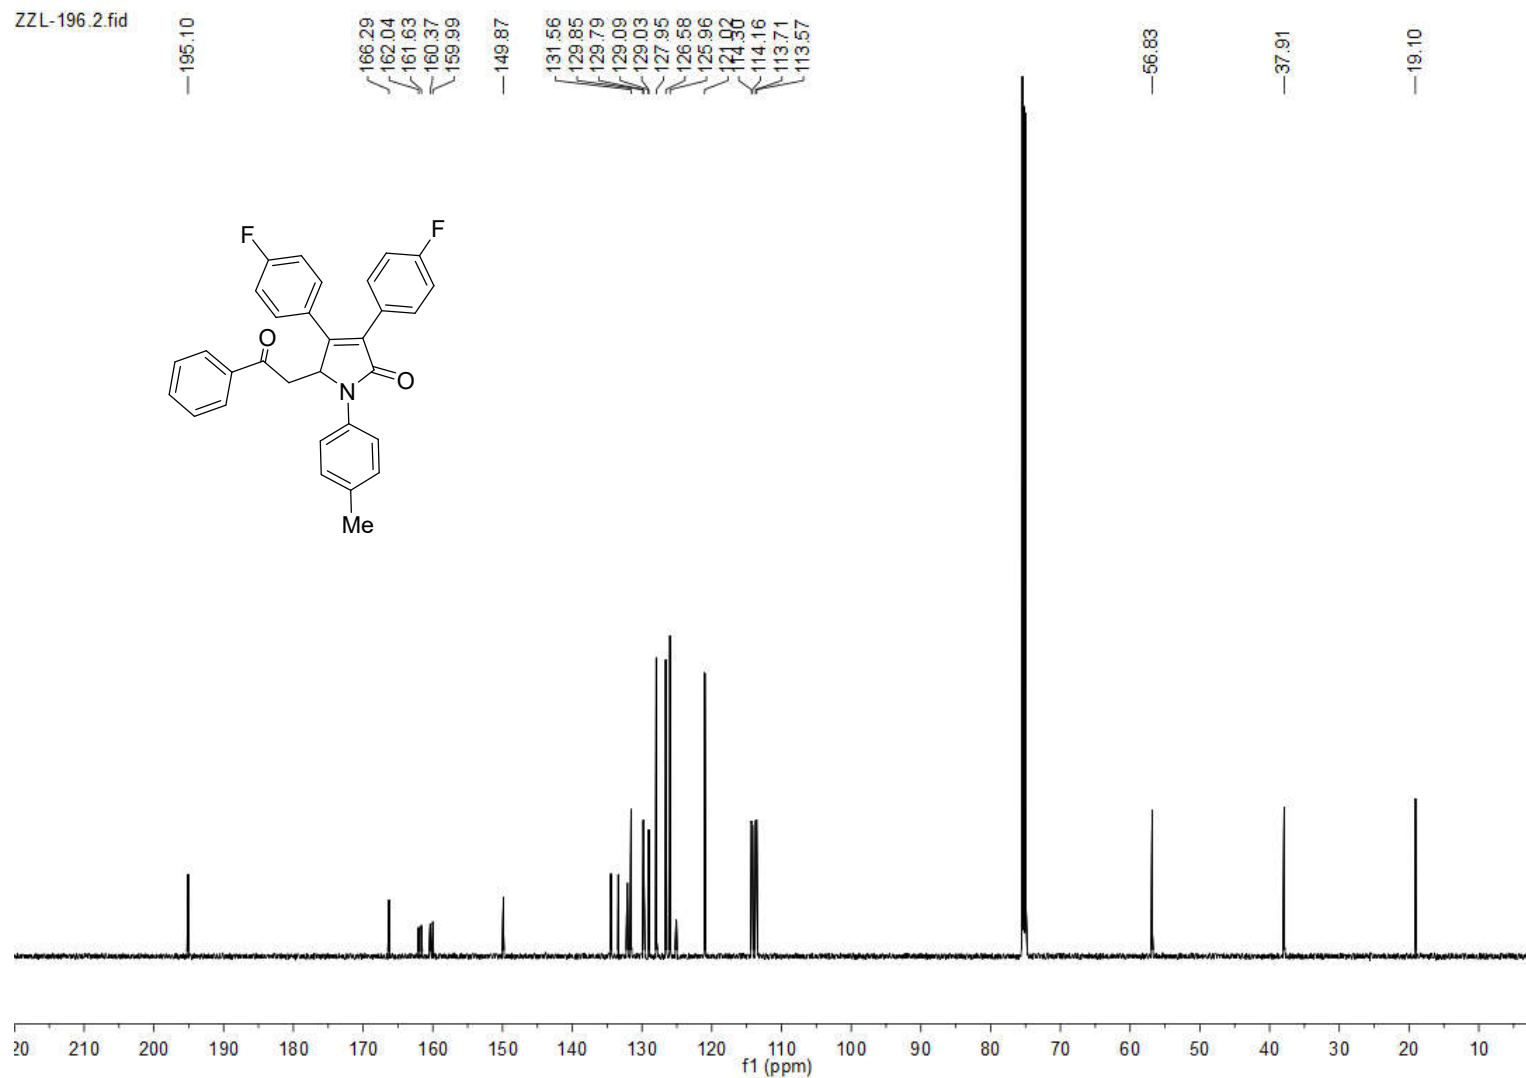

**Figure S118.**  $^{13}\text{C}$  NMR (150 MHz,  $\text{CDCl}_3$ ) spectra of compound **5z**

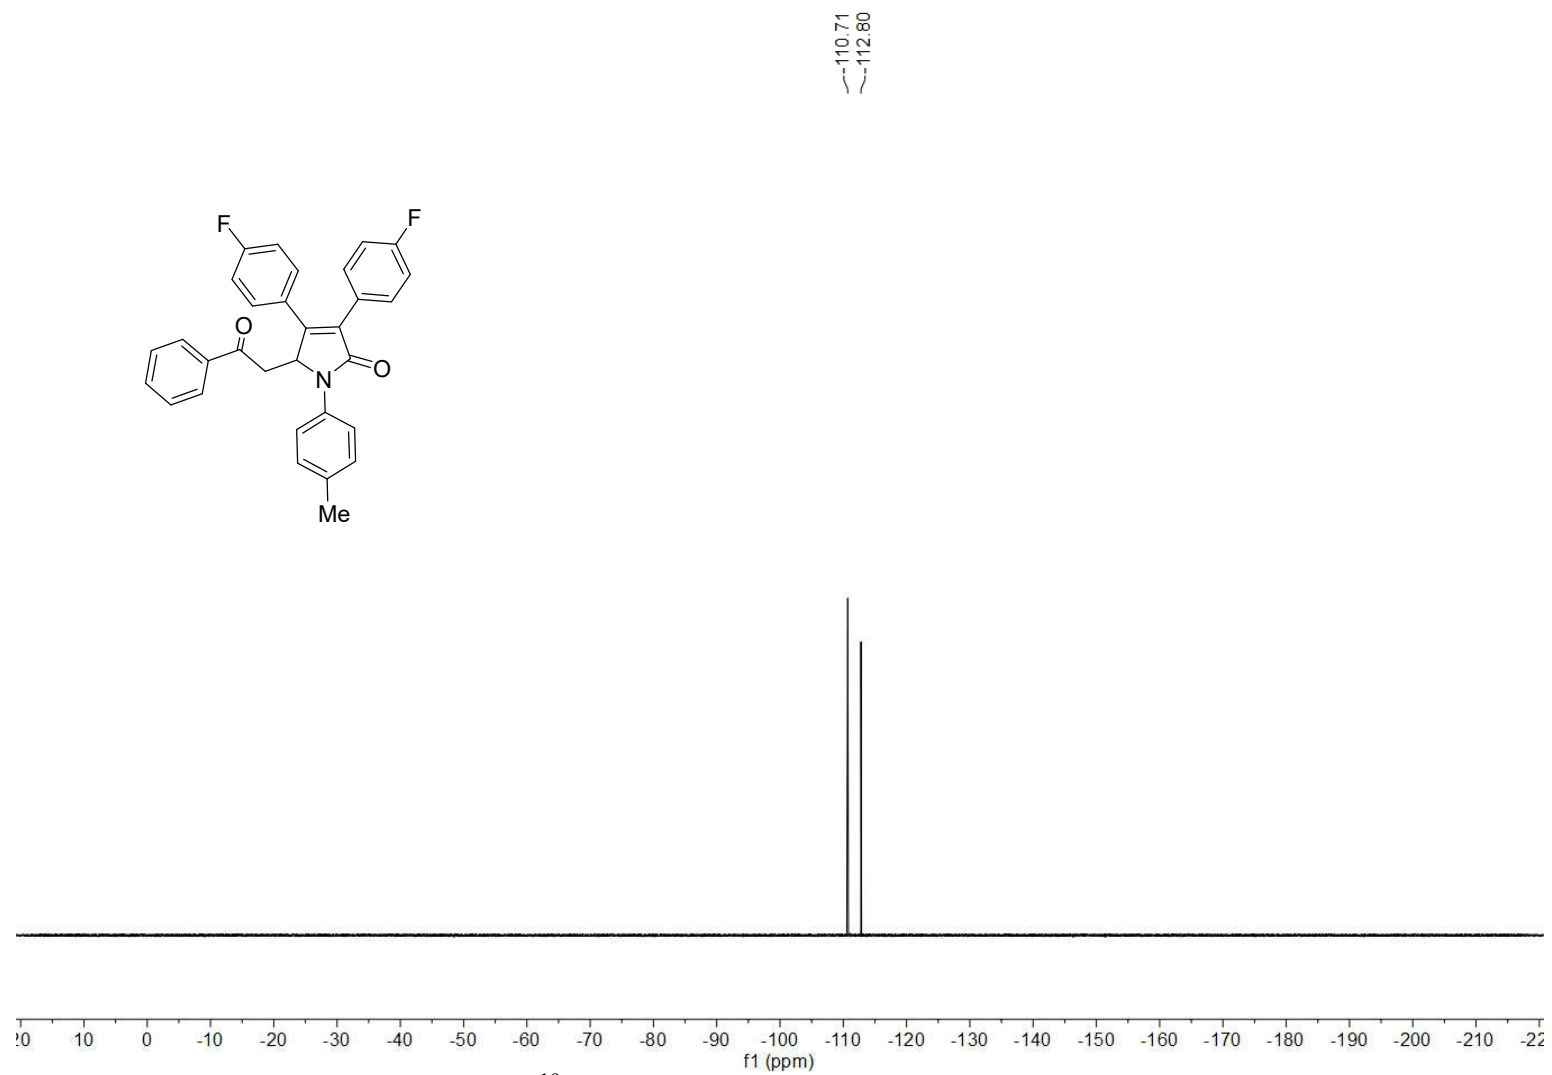

**Figure S119.**  $^{19}\text{F}$  NMR (470 MHz,  $\text{CDCl}_3$ ) spectra of compound **5z**

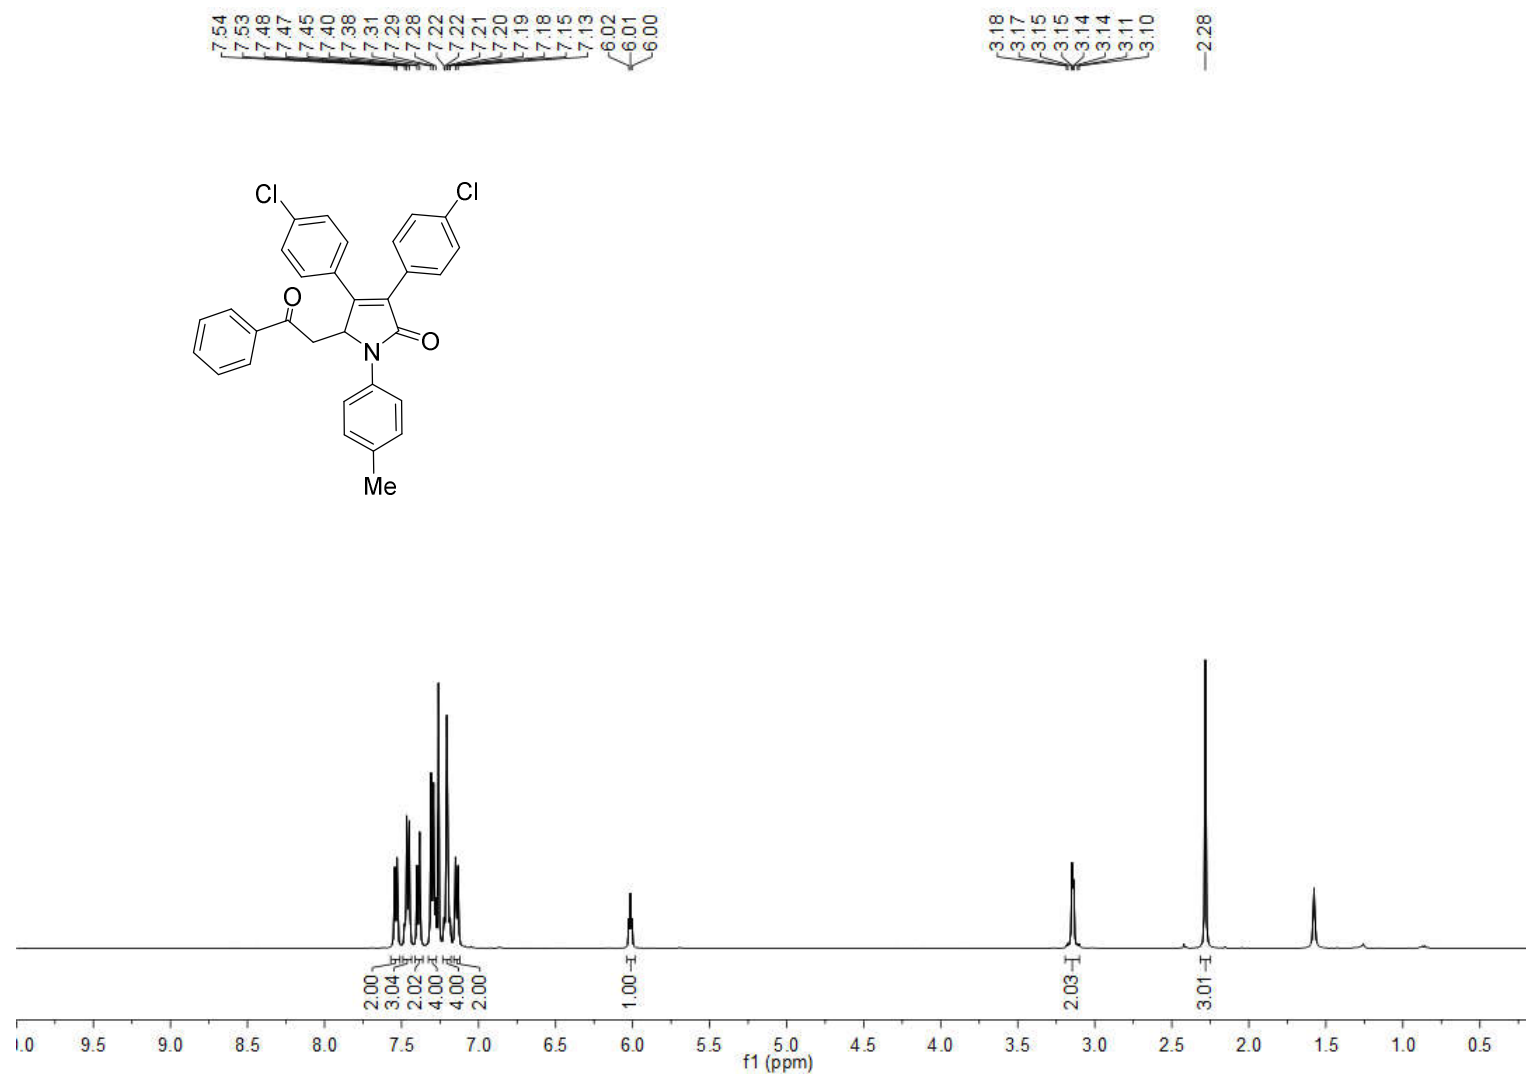

**Figure S120.** <sup>1</sup>H NMR (500 MHz, CDCl<sub>3</sub>) spectra of compound **5a'**

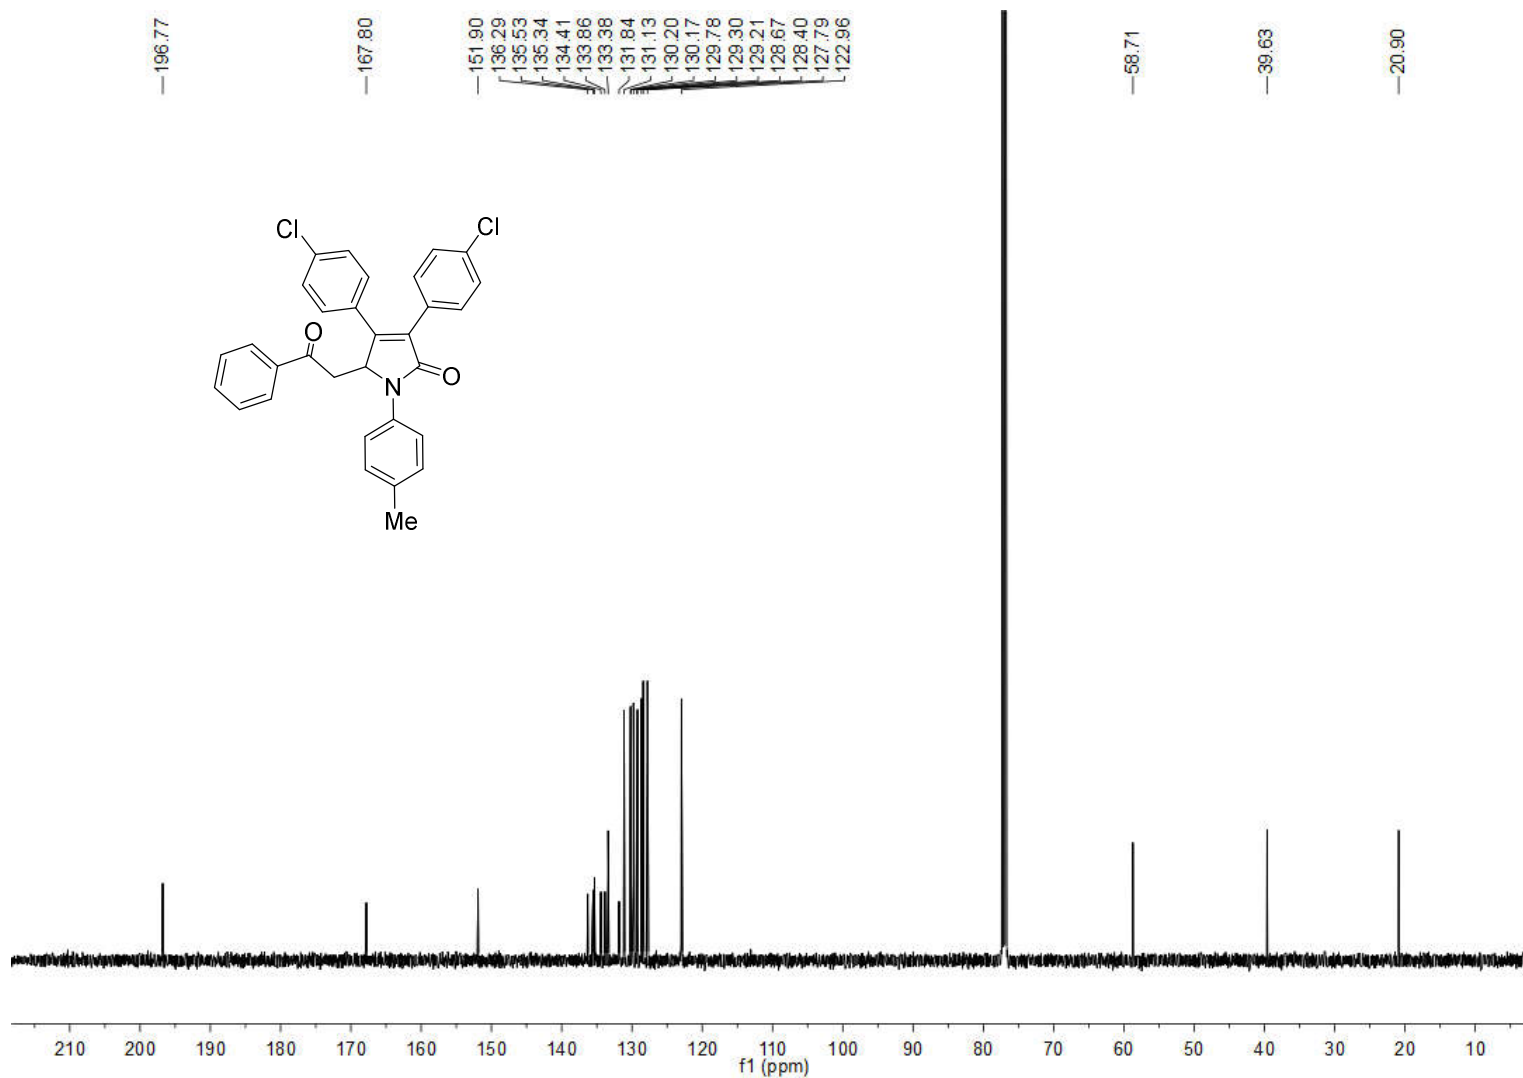

Figure S121. <sup>13</sup>C NMR (125 MHz, CDCl<sub>3</sub>) spectra of compound 5a'

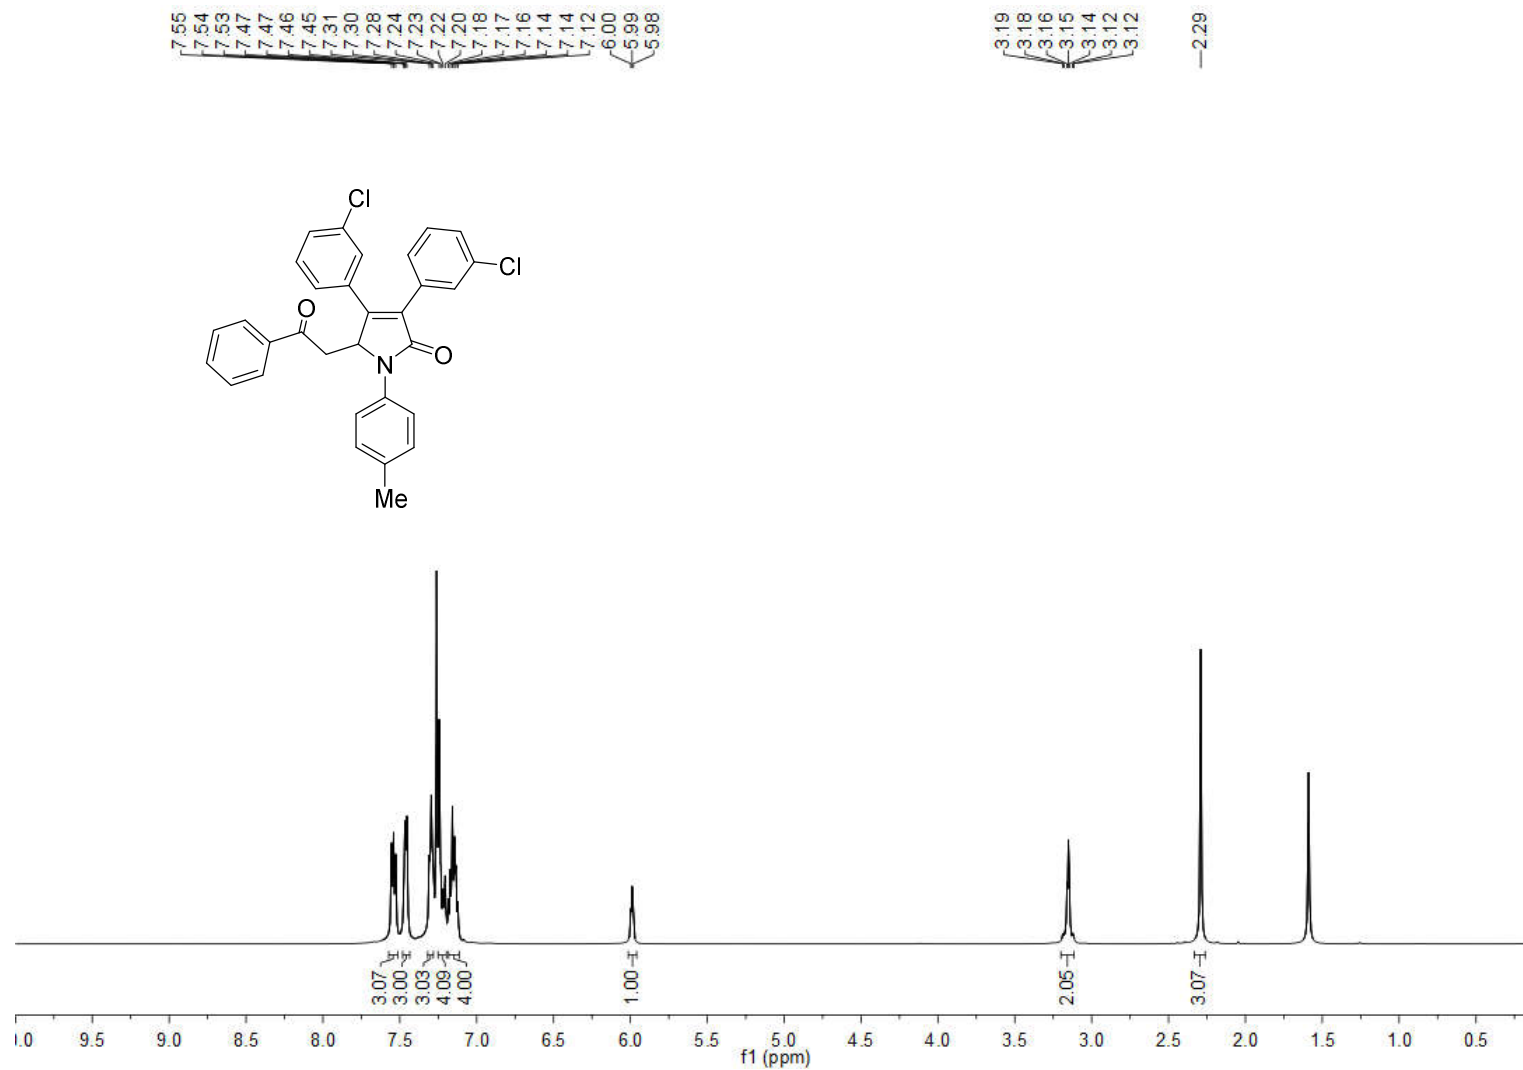

**Figure S122.** <sup>1</sup>H NMR (600 MHz, CDCl<sub>3</sub>) spectra of compound **5b'**

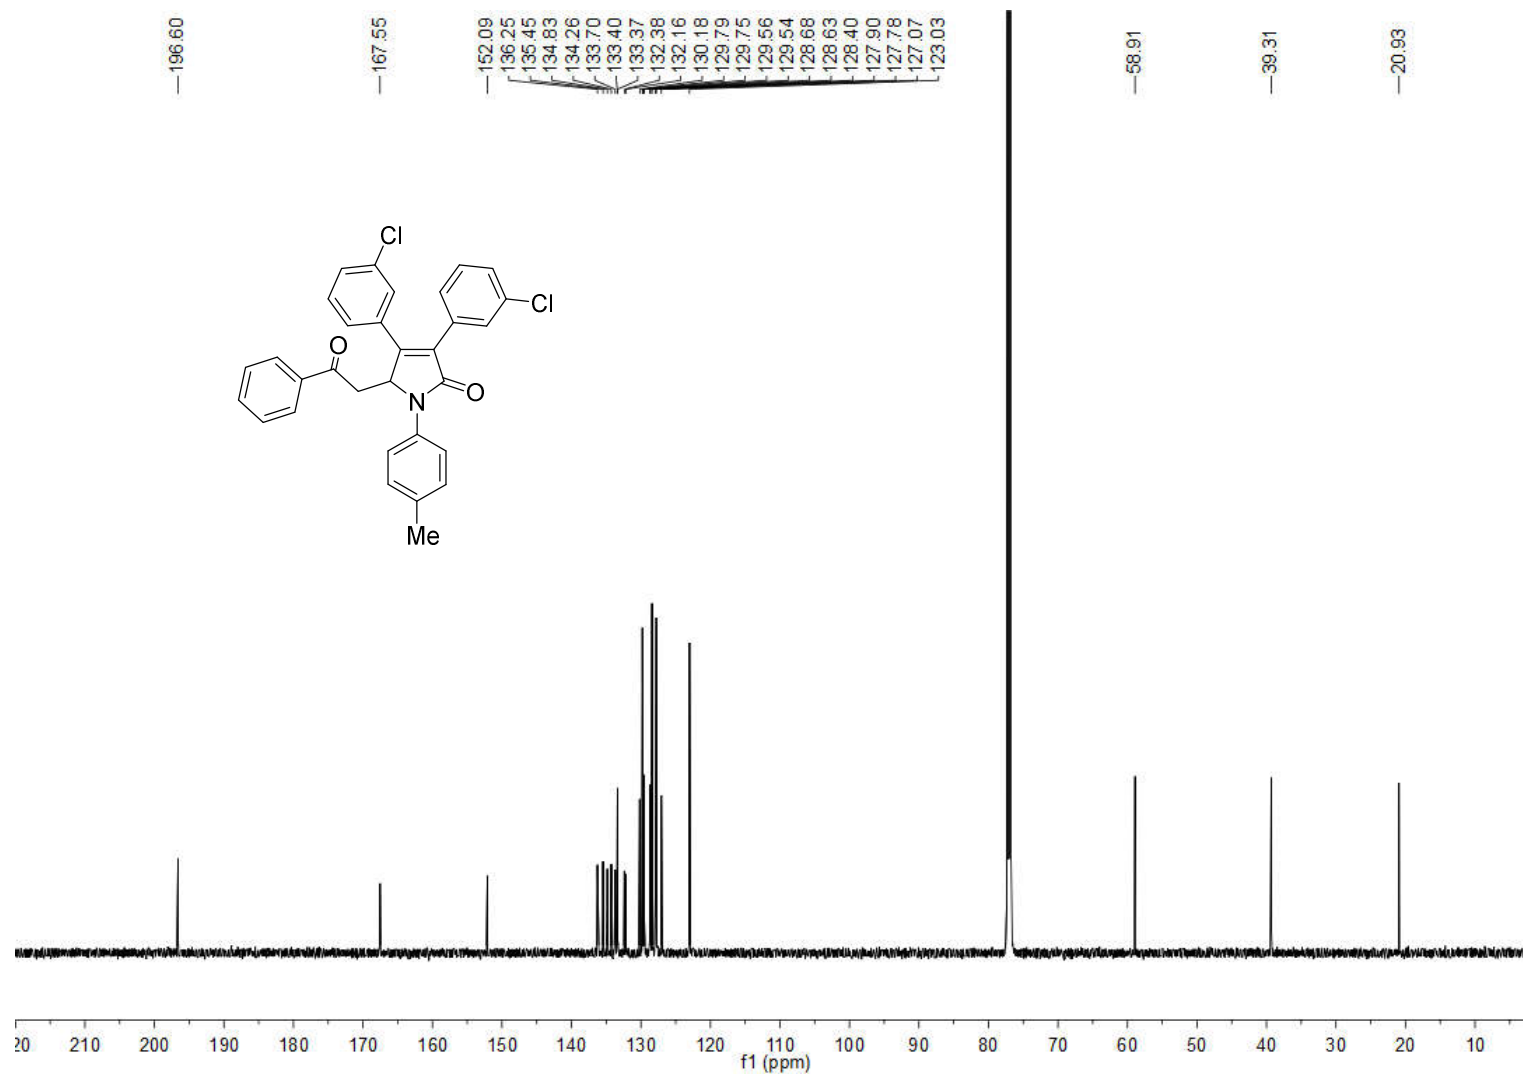

Figure S123. <sup>13</sup>C NMR (150 MHz, CDCl<sub>3</sub>) spectra of compound **5b'**



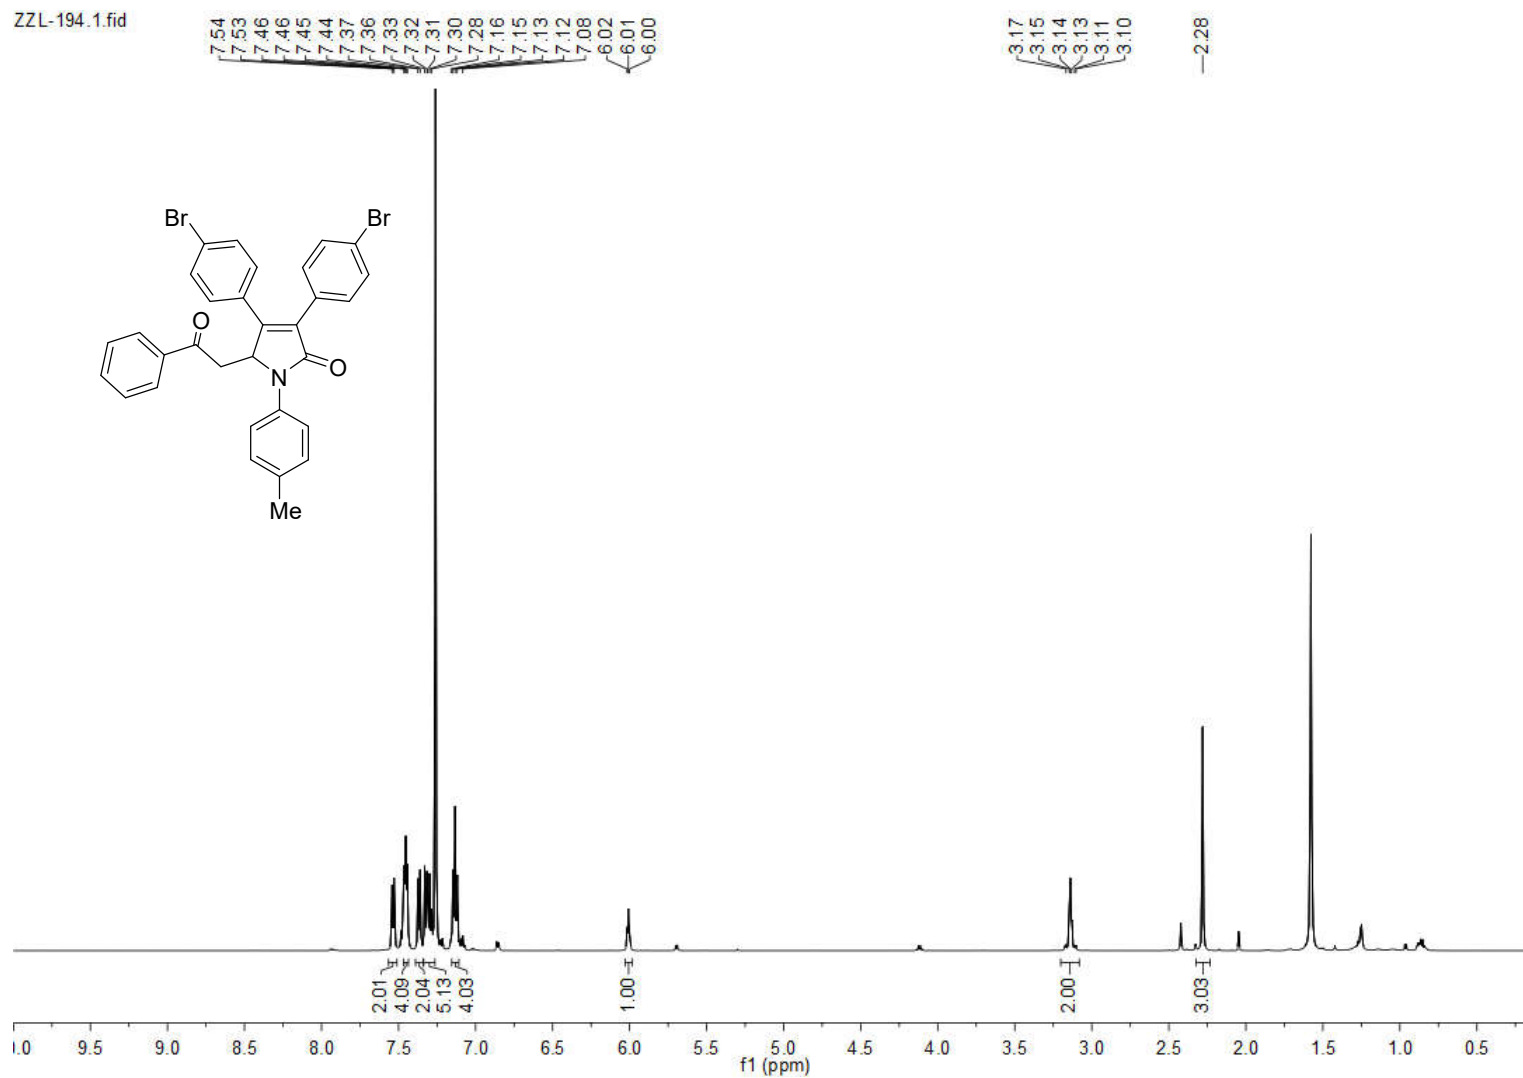

Figure S124. <sup>1</sup>H NMR (600 MHz, CDCl<sub>3</sub>) spectra of compound 5c'

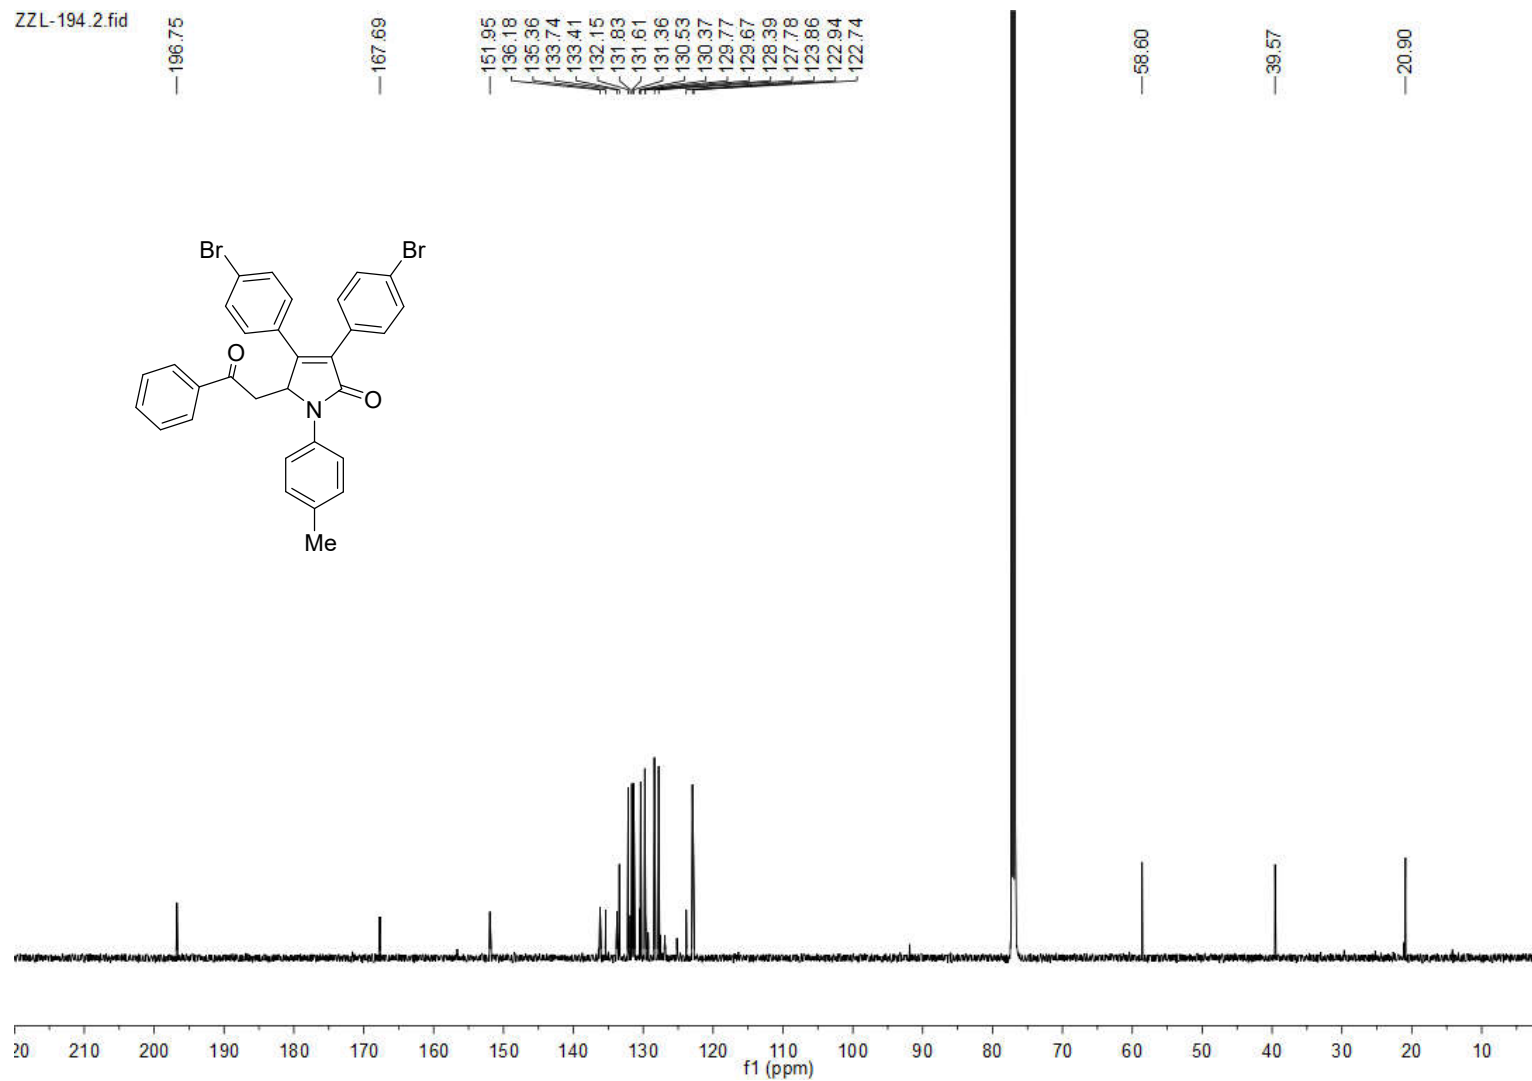

Figure S125.  $^{13}\text{C}$  NMR (150 MHz,  $\text{CDCl}_3$ ) spectra of compound **5c'**

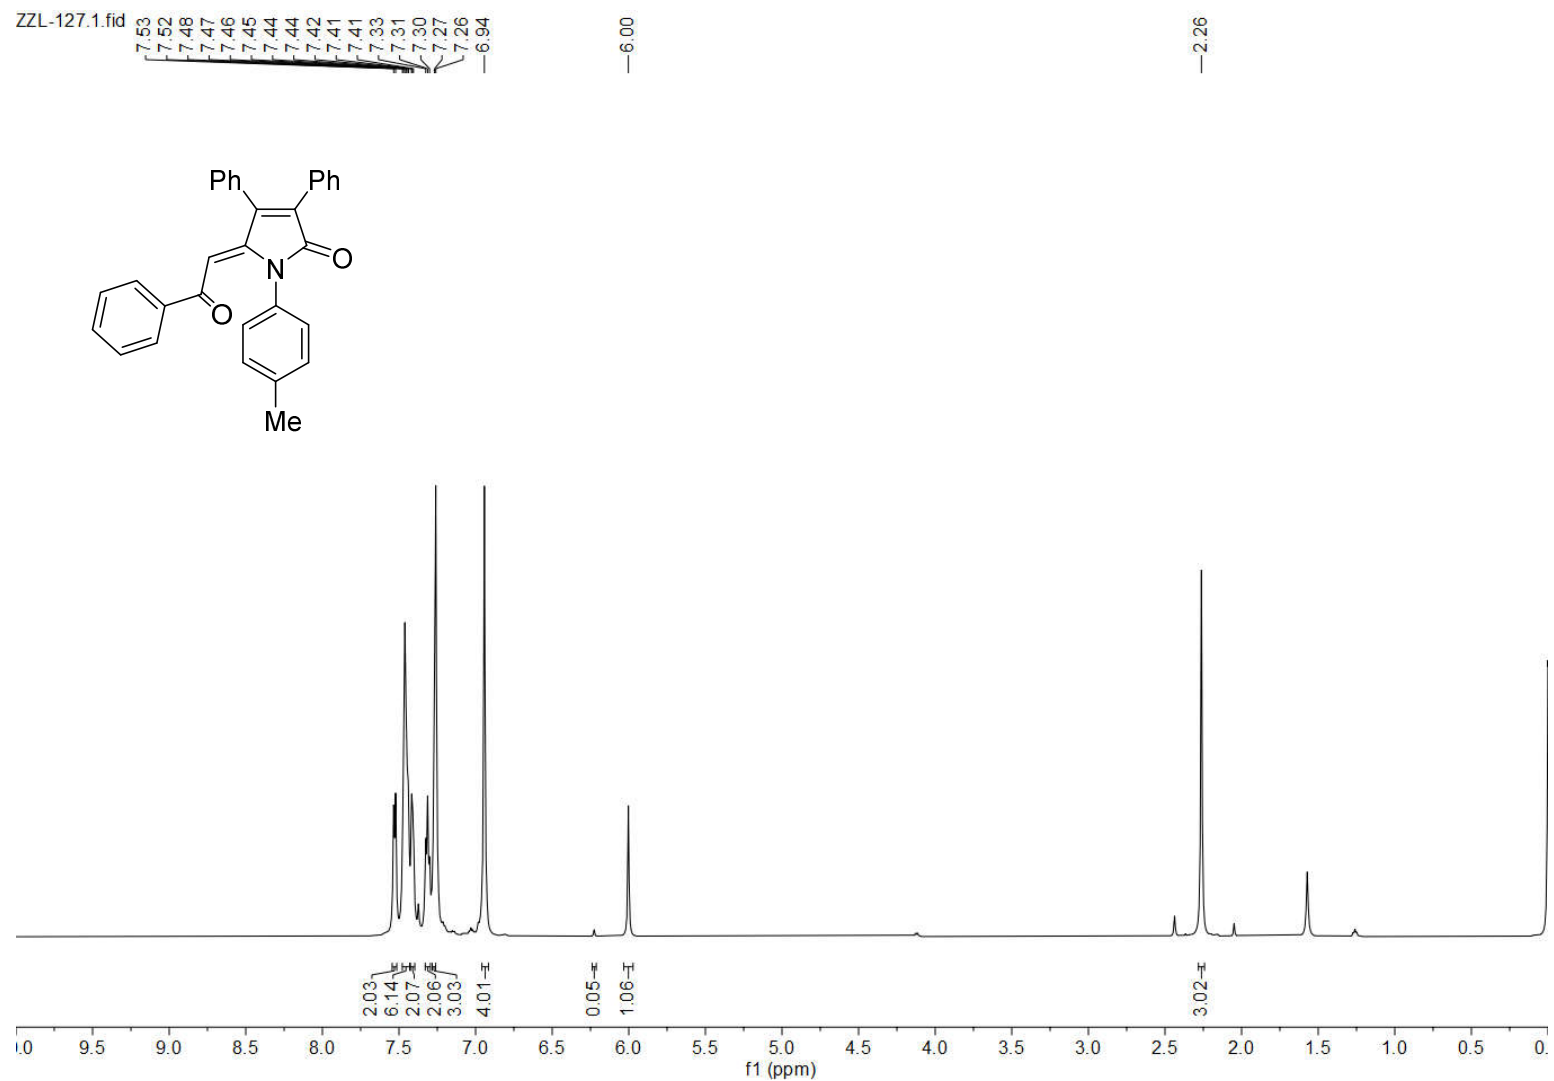

**Figure S126.**  $^1\text{H}$  NMR (600 MHz,  $\text{CDCl}_3$ ) spectra of compound **7a**

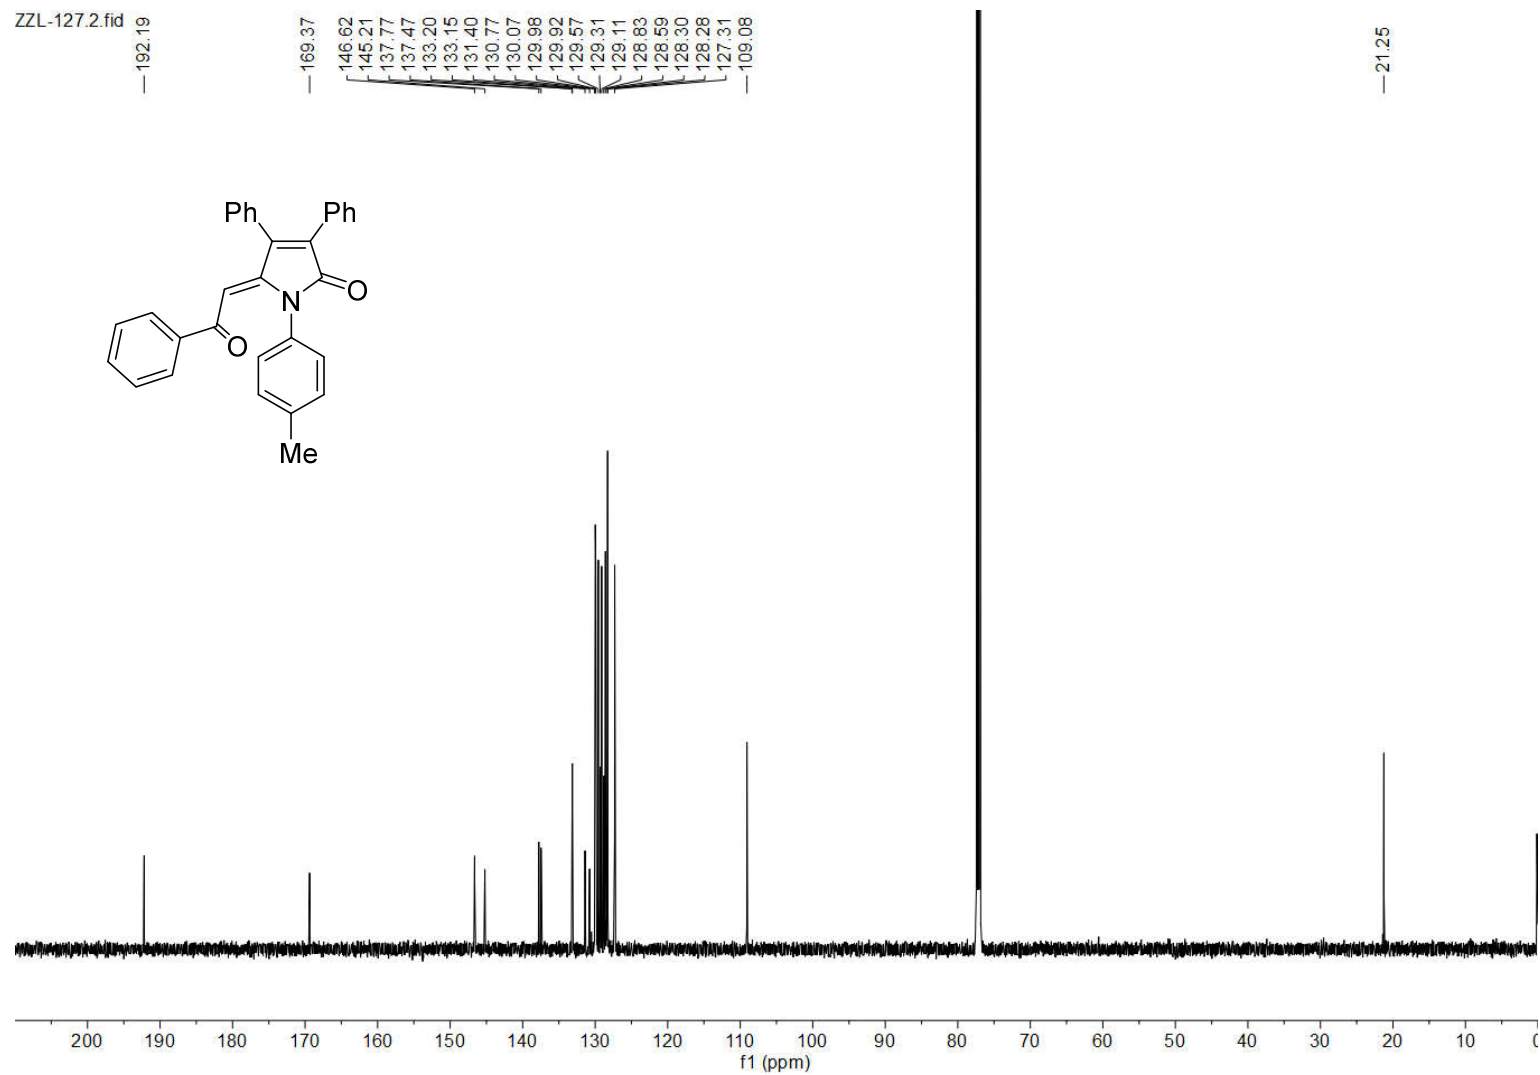

Figure S127.  $^{13}\text{C}$  NMR (150 MHz,  $\text{CDCl}_3$ ) spectra of compound 7a

zzl-175.1.fid

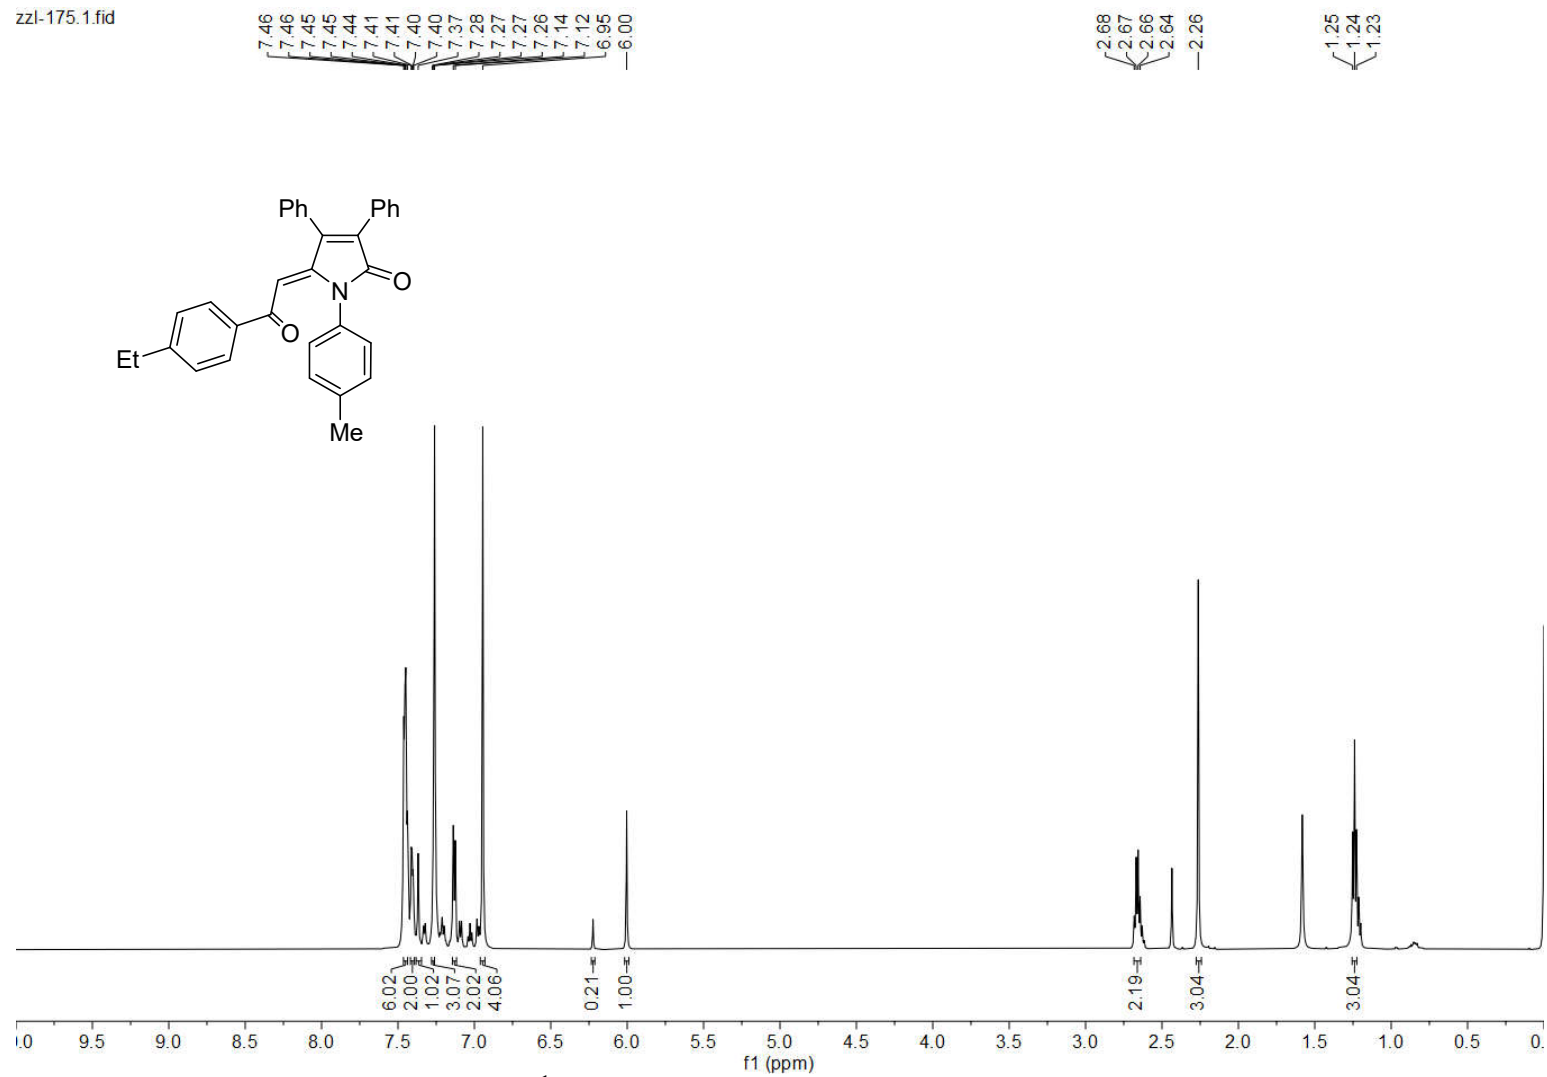

Figure S128.  $^1\text{H}$  NMR (600 MHz,  $\text{CDCl}_3$ ) spectra of compound 7b

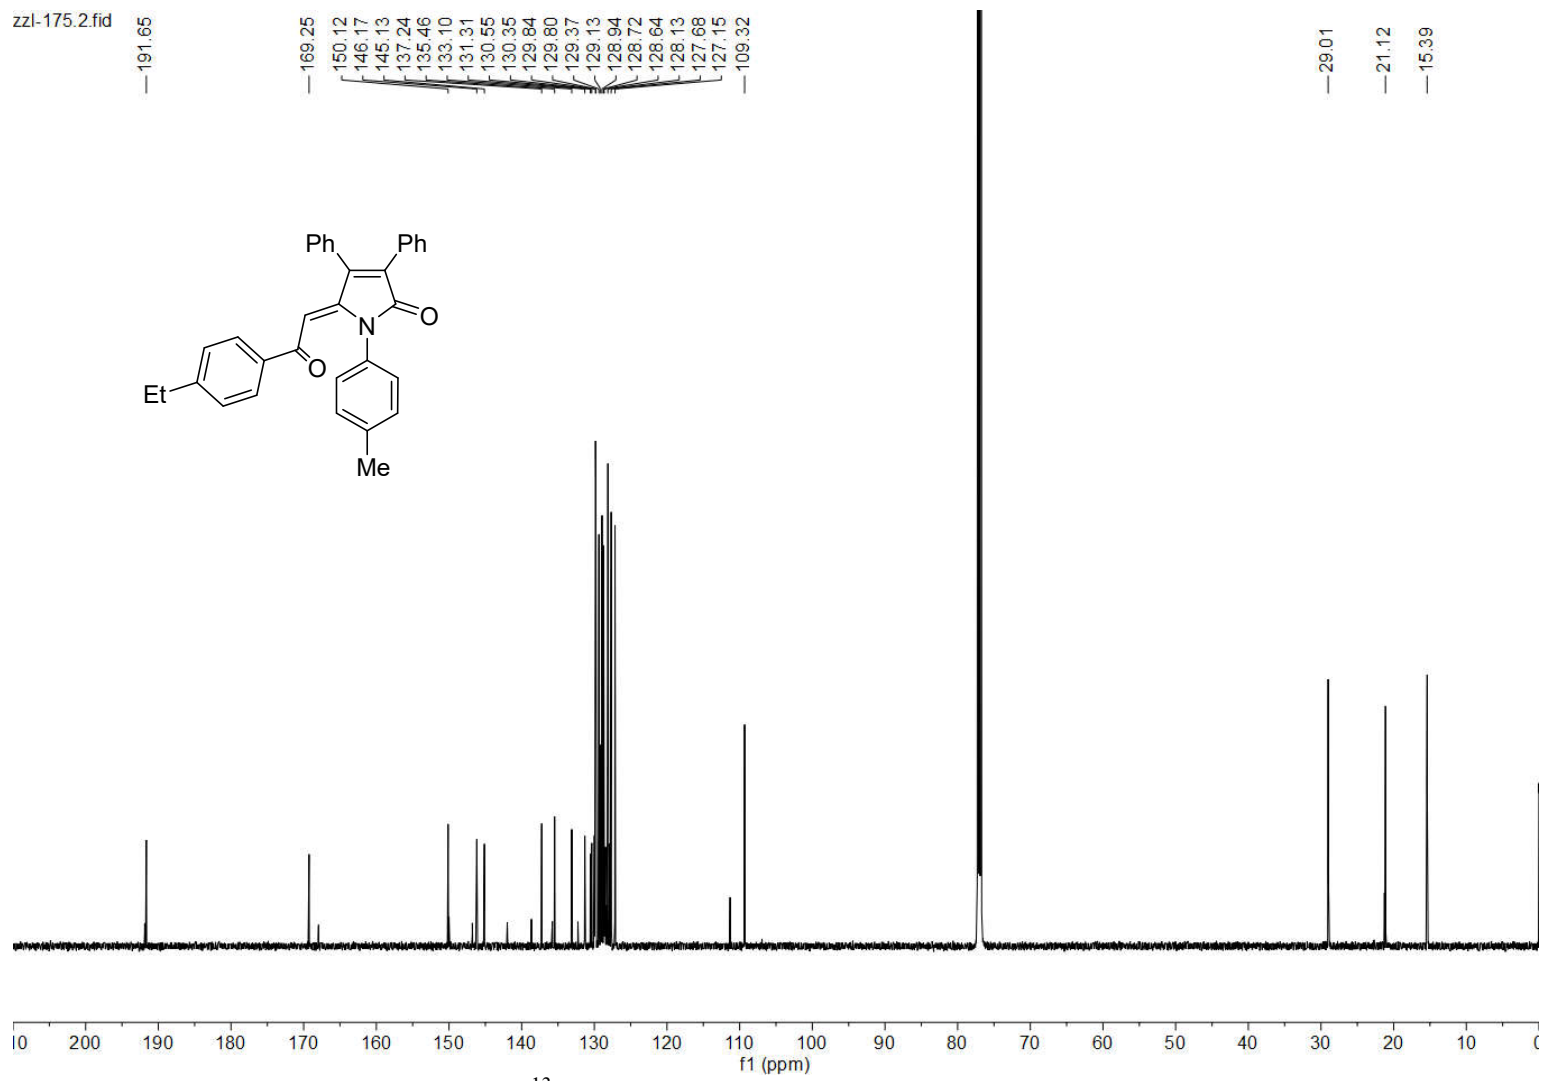

Figure S129. <sup>13</sup>C NMR (150 MHz, CDCl<sub>3</sub>) spectra of compound 7b

zzl-173.1.fid

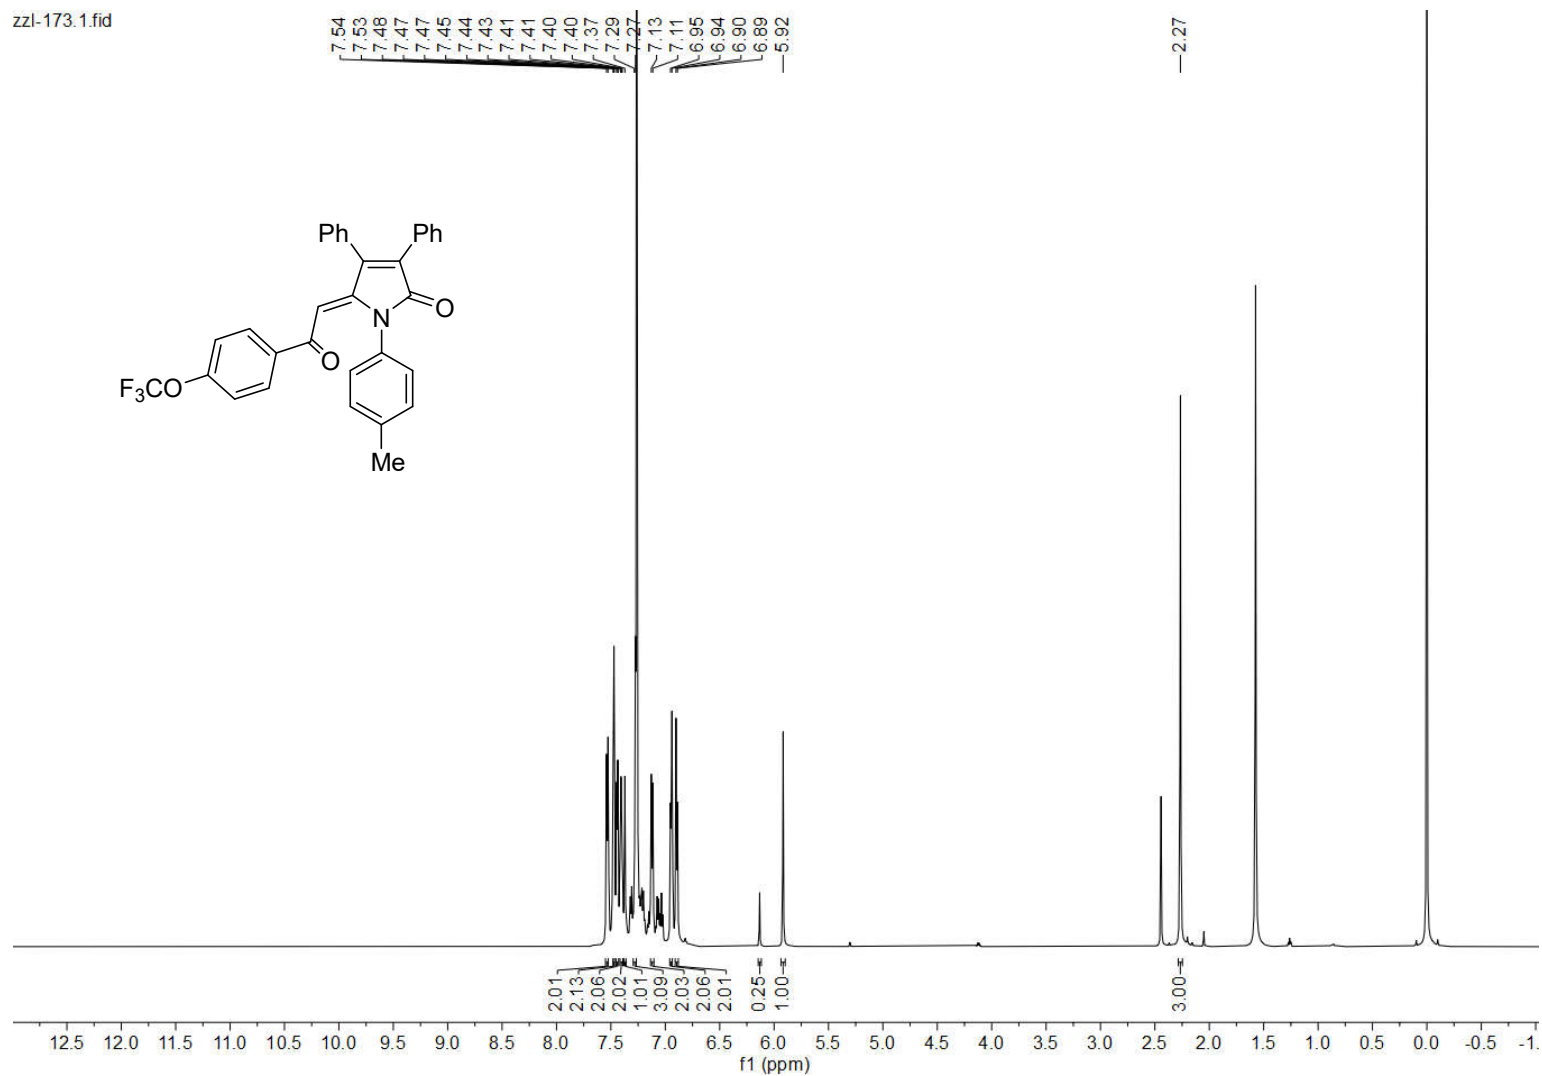

Figure S130.  $^1\text{H}$  NMR (600 MHz,  $\text{CDCl}_3$ ) spectra of compound 7c

zsl-173.2.fid

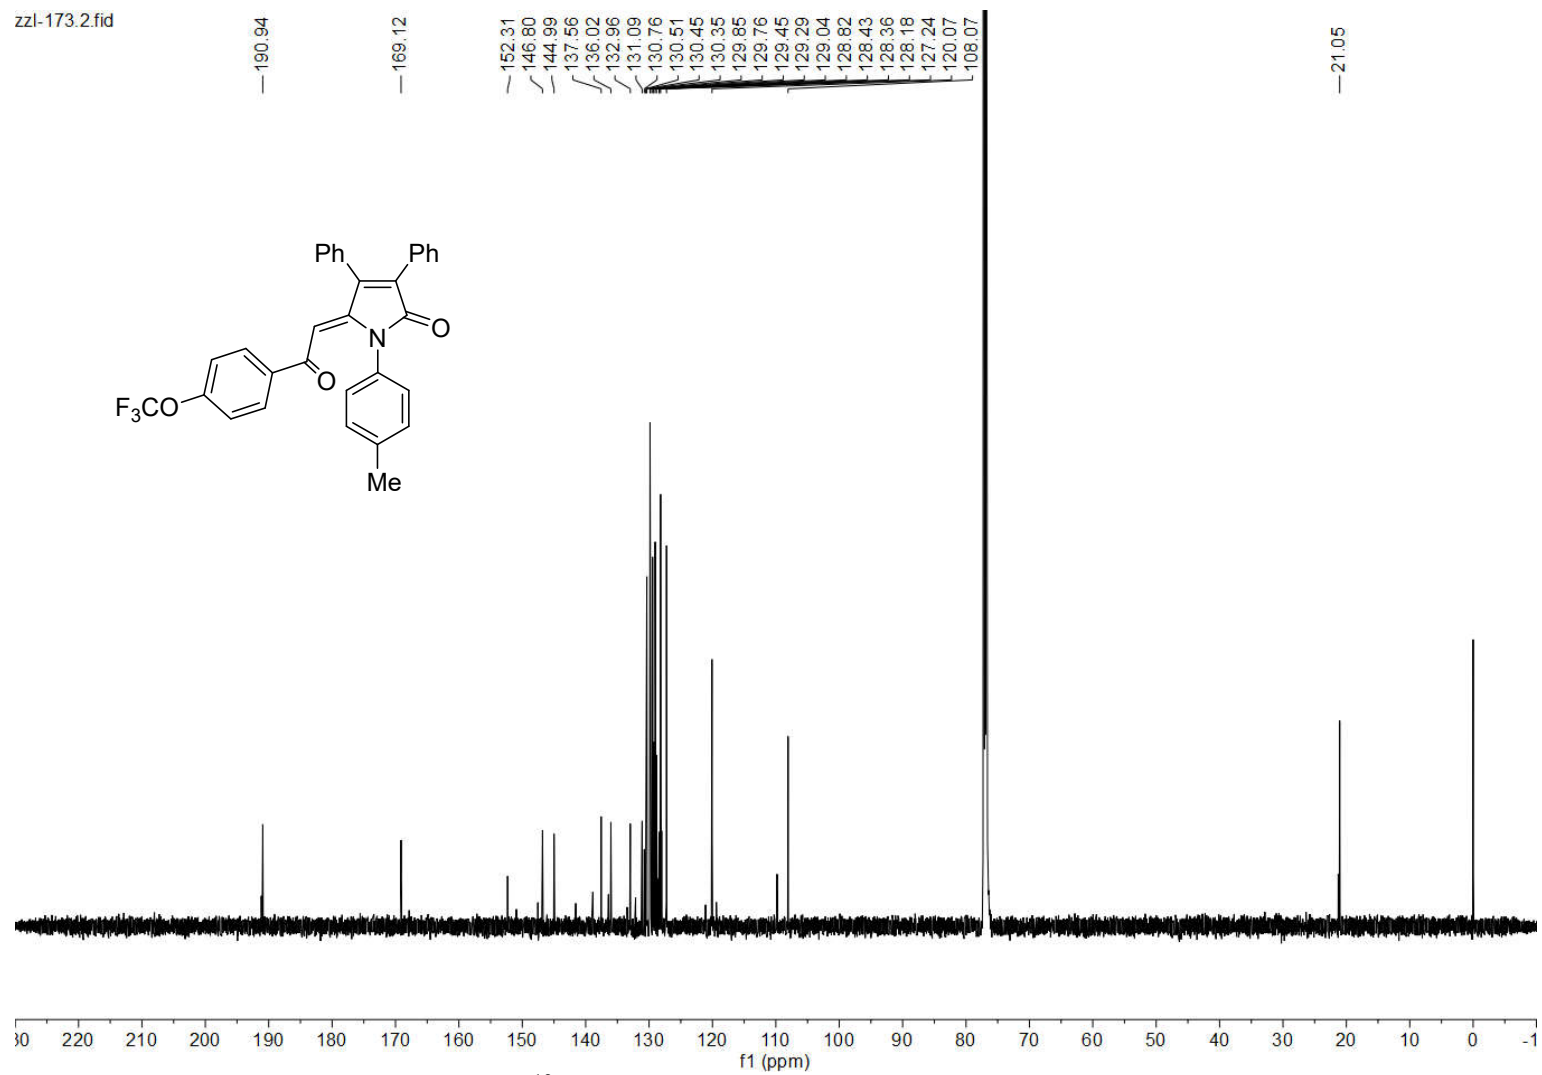

Figure S131. <sup>13</sup>C NMR (150 MHz, CDCl<sub>3</sub>) spectra of compound 7c



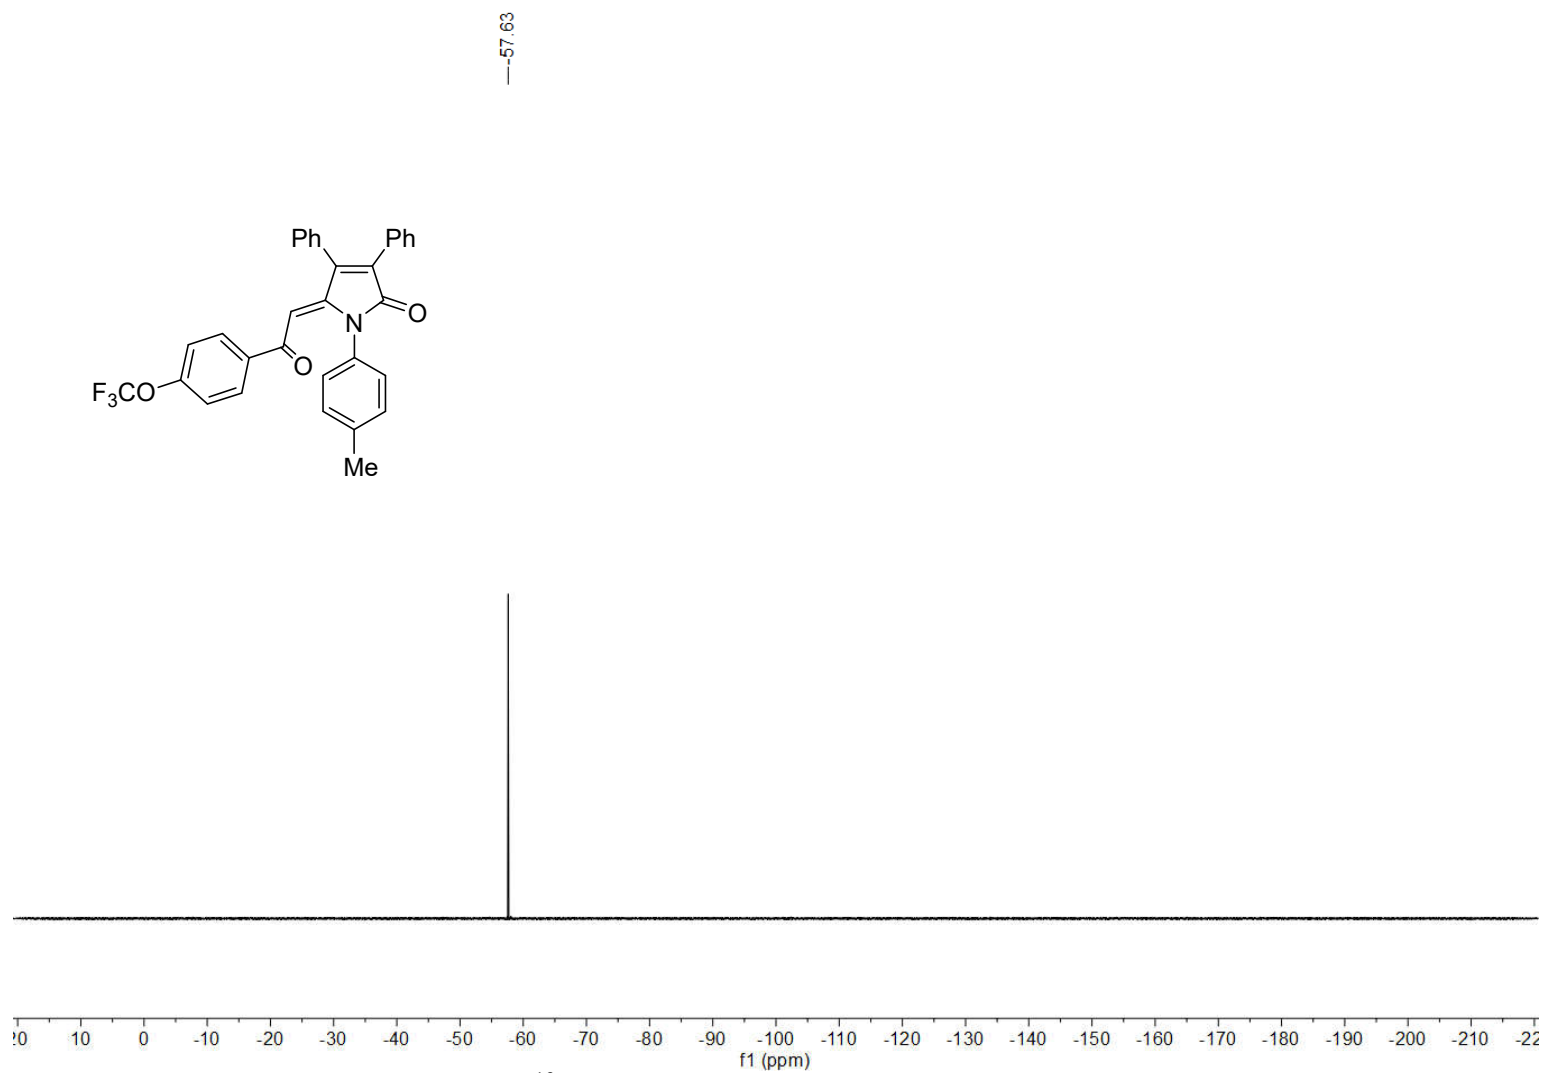

**Figure S132.**  $^{19}\text{F}$  NMR (470 MHz,  $\text{CDCl}_3$ ) spectra of compound **7c**

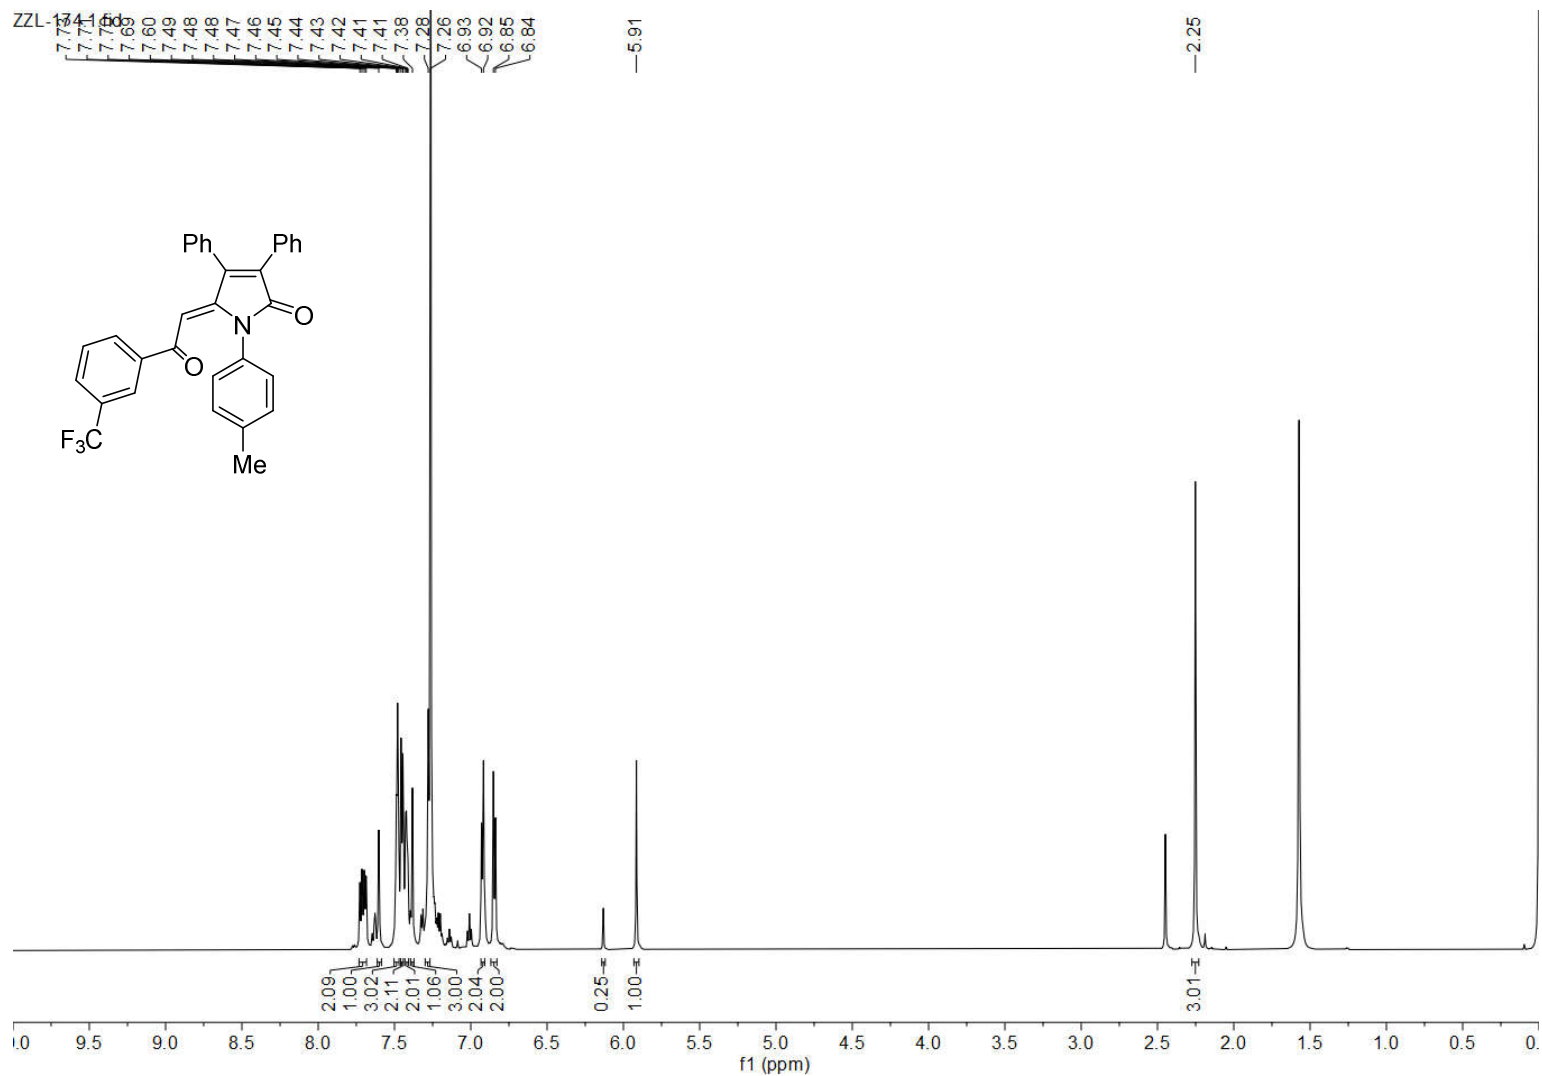

Figure S133. <sup>1</sup>H NMR (600 MHz, CDCl<sub>3</sub>) spectra of compound 7d

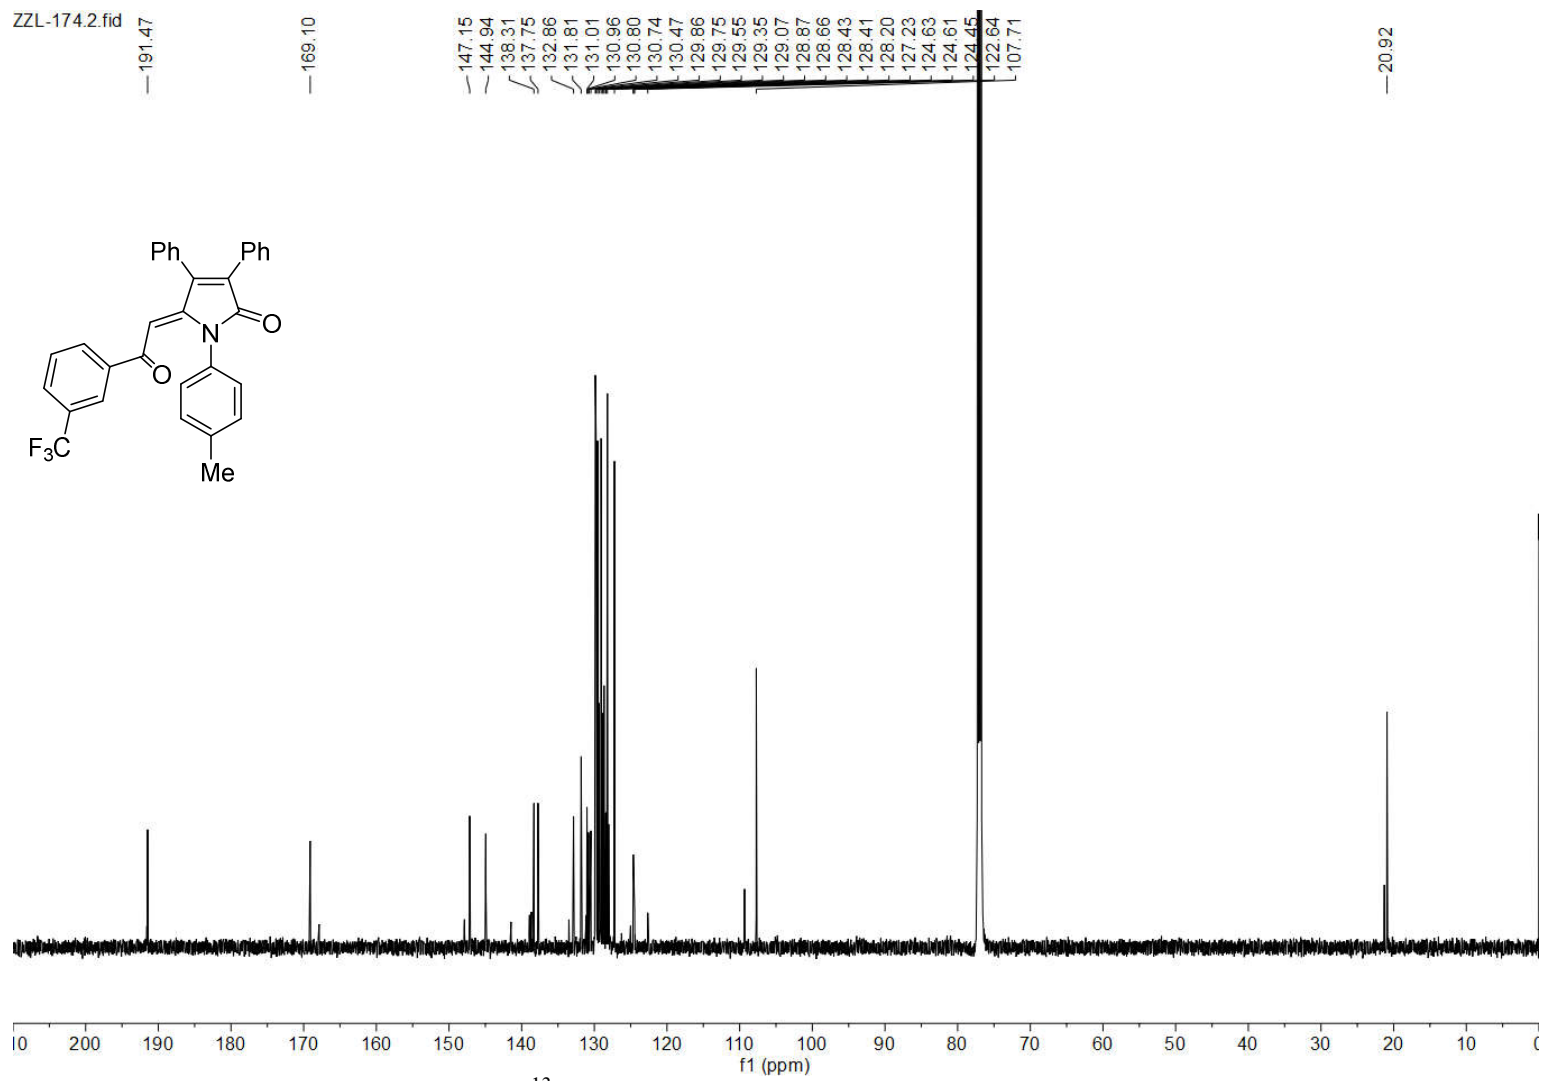

Figure S134. <sup>13</sup>C NMR (150 MHz, CDCl<sub>3</sub>) spectra of compound 7d

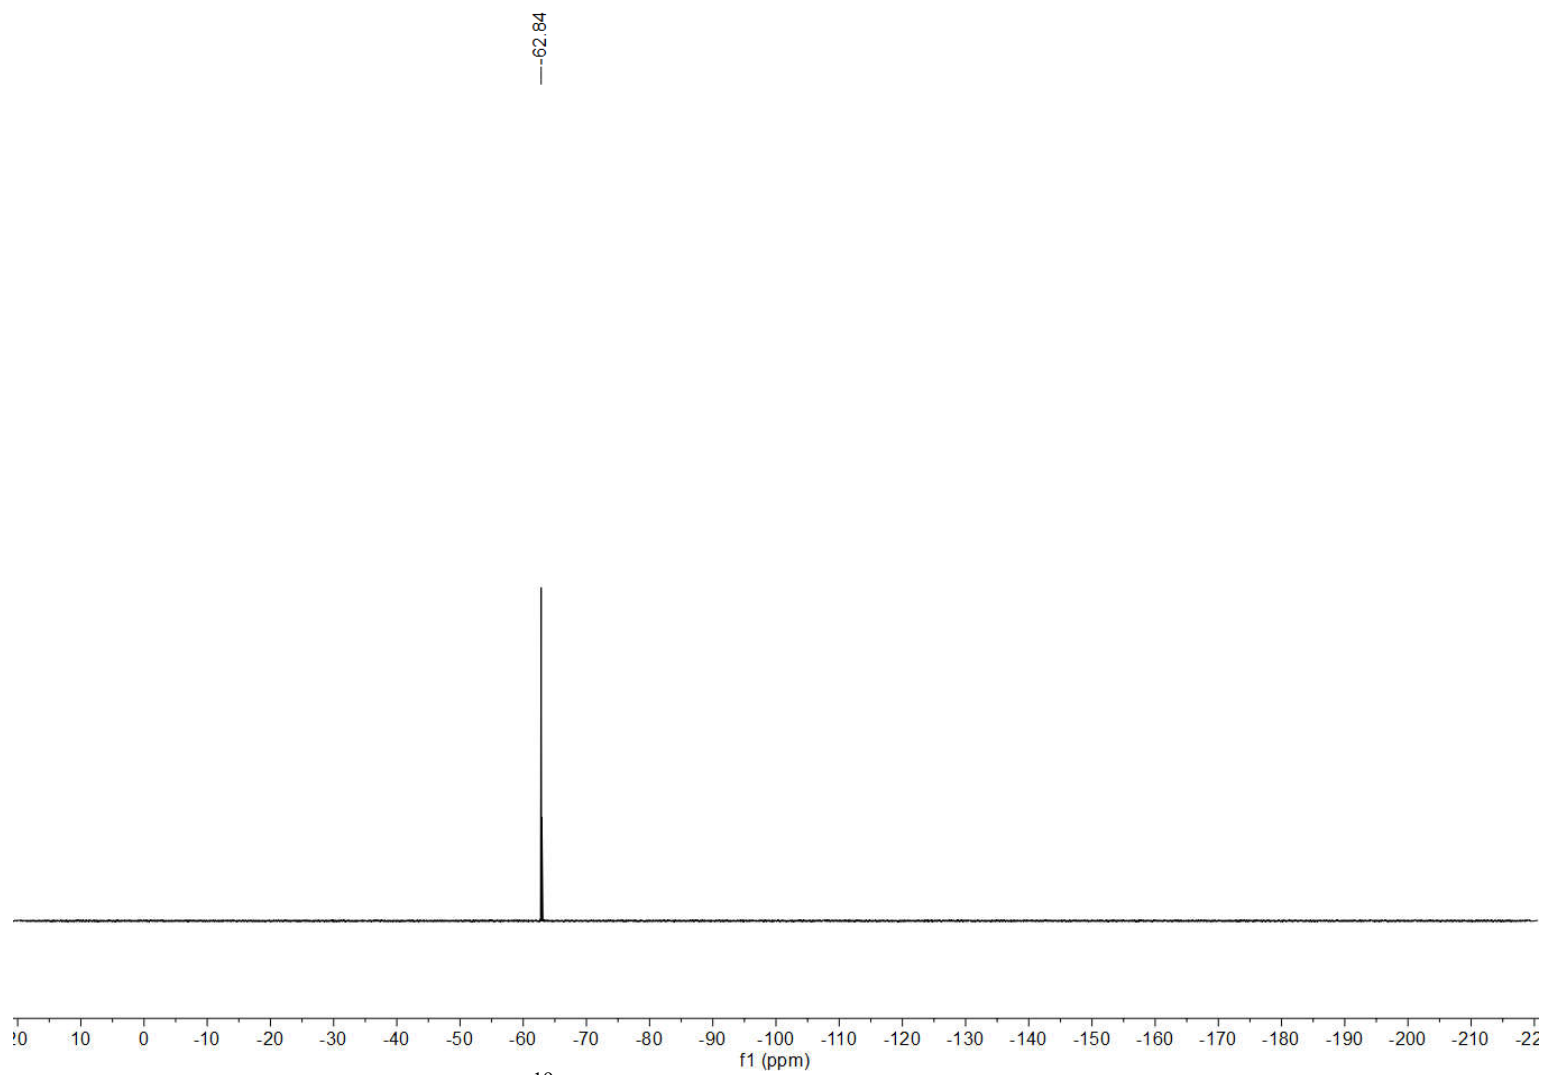

**Figure S135.**  $^{19}\text{F}$  NMR (470 MHz,  $\text{CDCl}_3$ ) spectra of compound **7d**

ZZL-184.1.fid

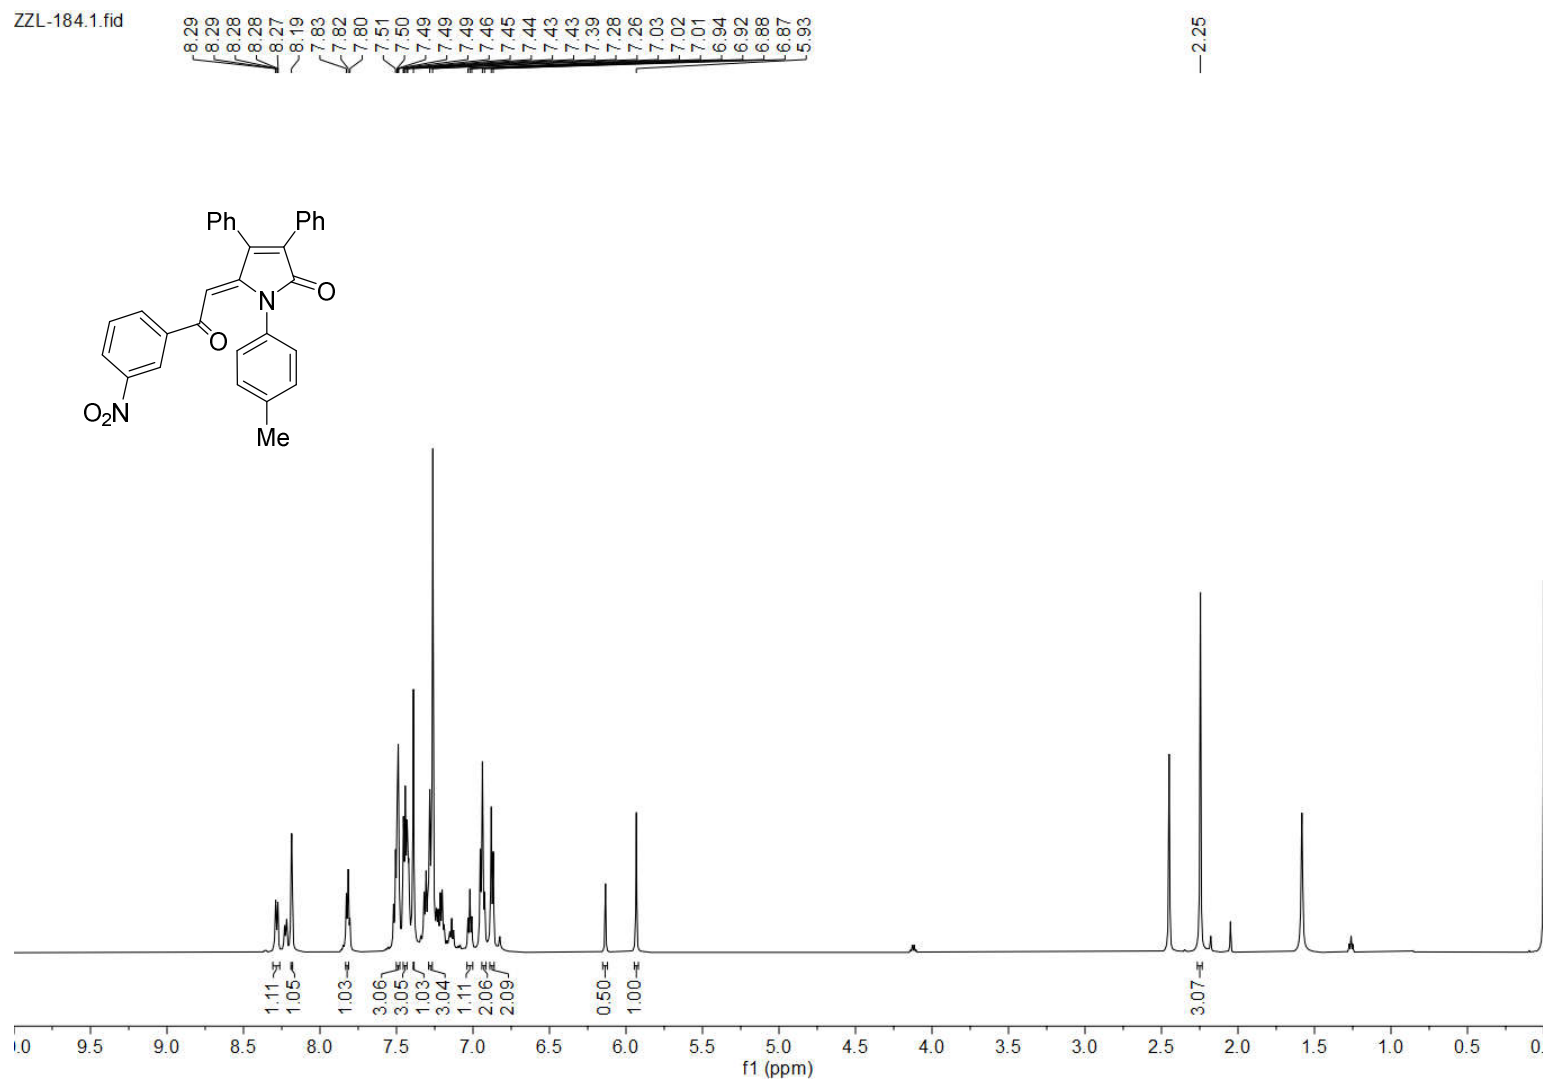

Figure S136. <sup>1</sup>H NMR (600 MHz, CDCl<sub>3</sub>) spectra of compound 7e

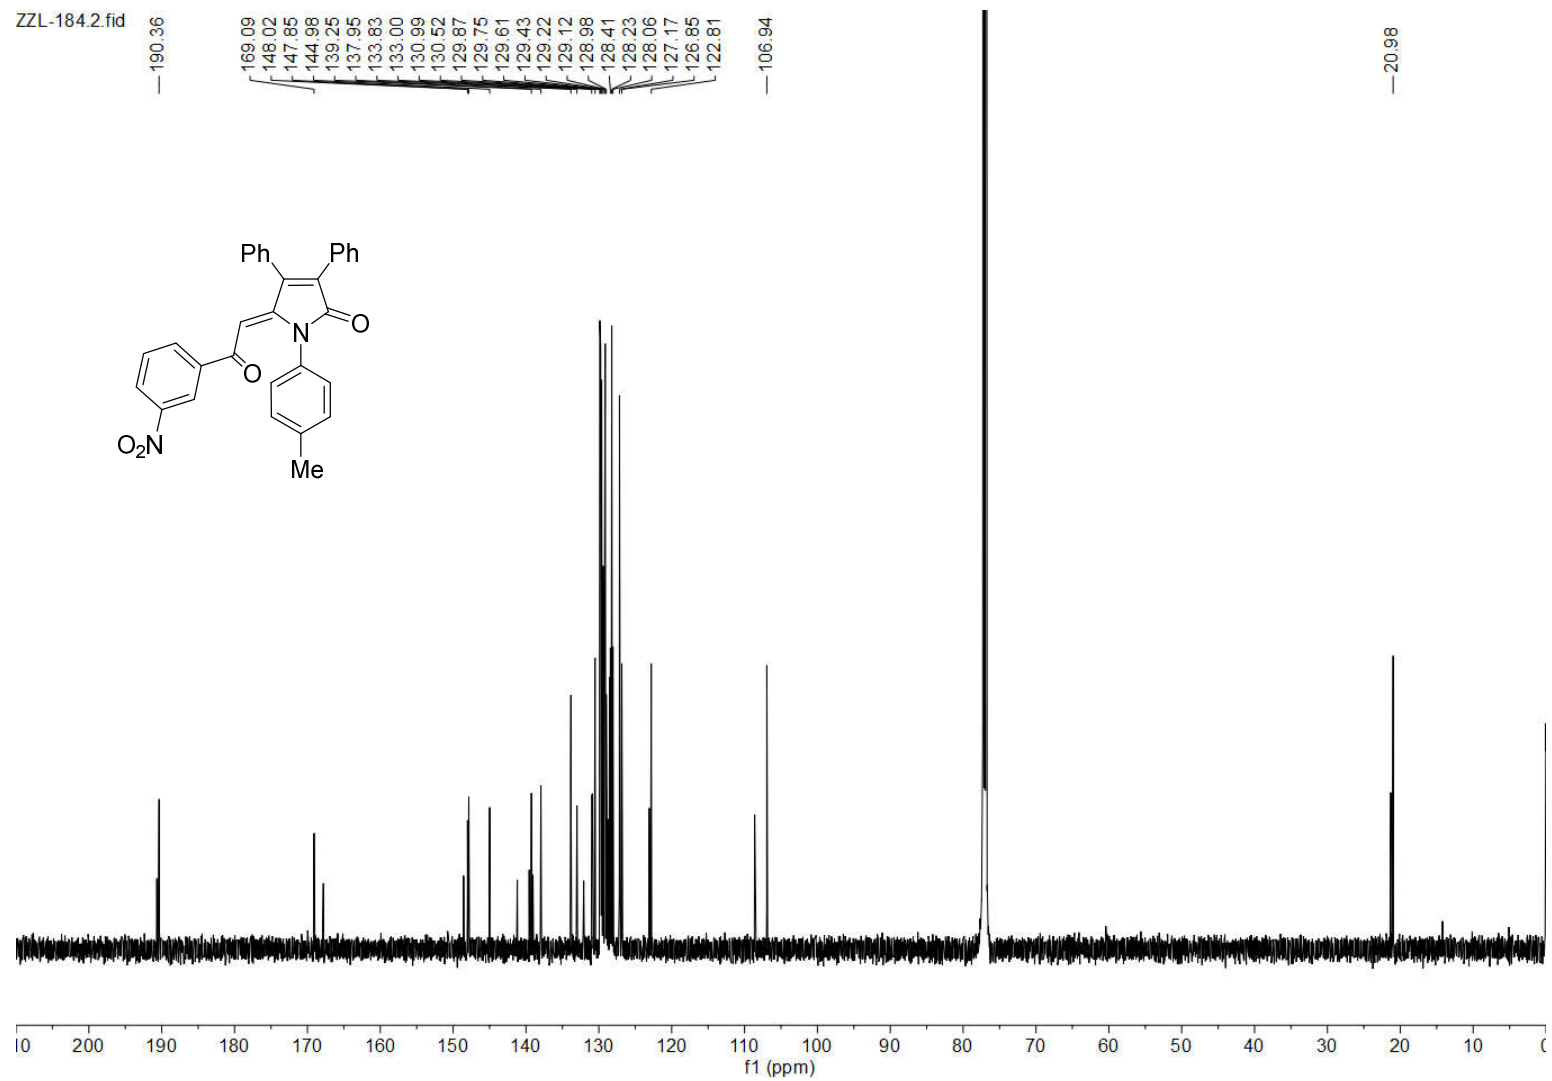

Figure S137.  $^{13}\text{C}$  NMR (150 MHz,  $\text{CDCl}_3$ ) spectra of compound **7e**

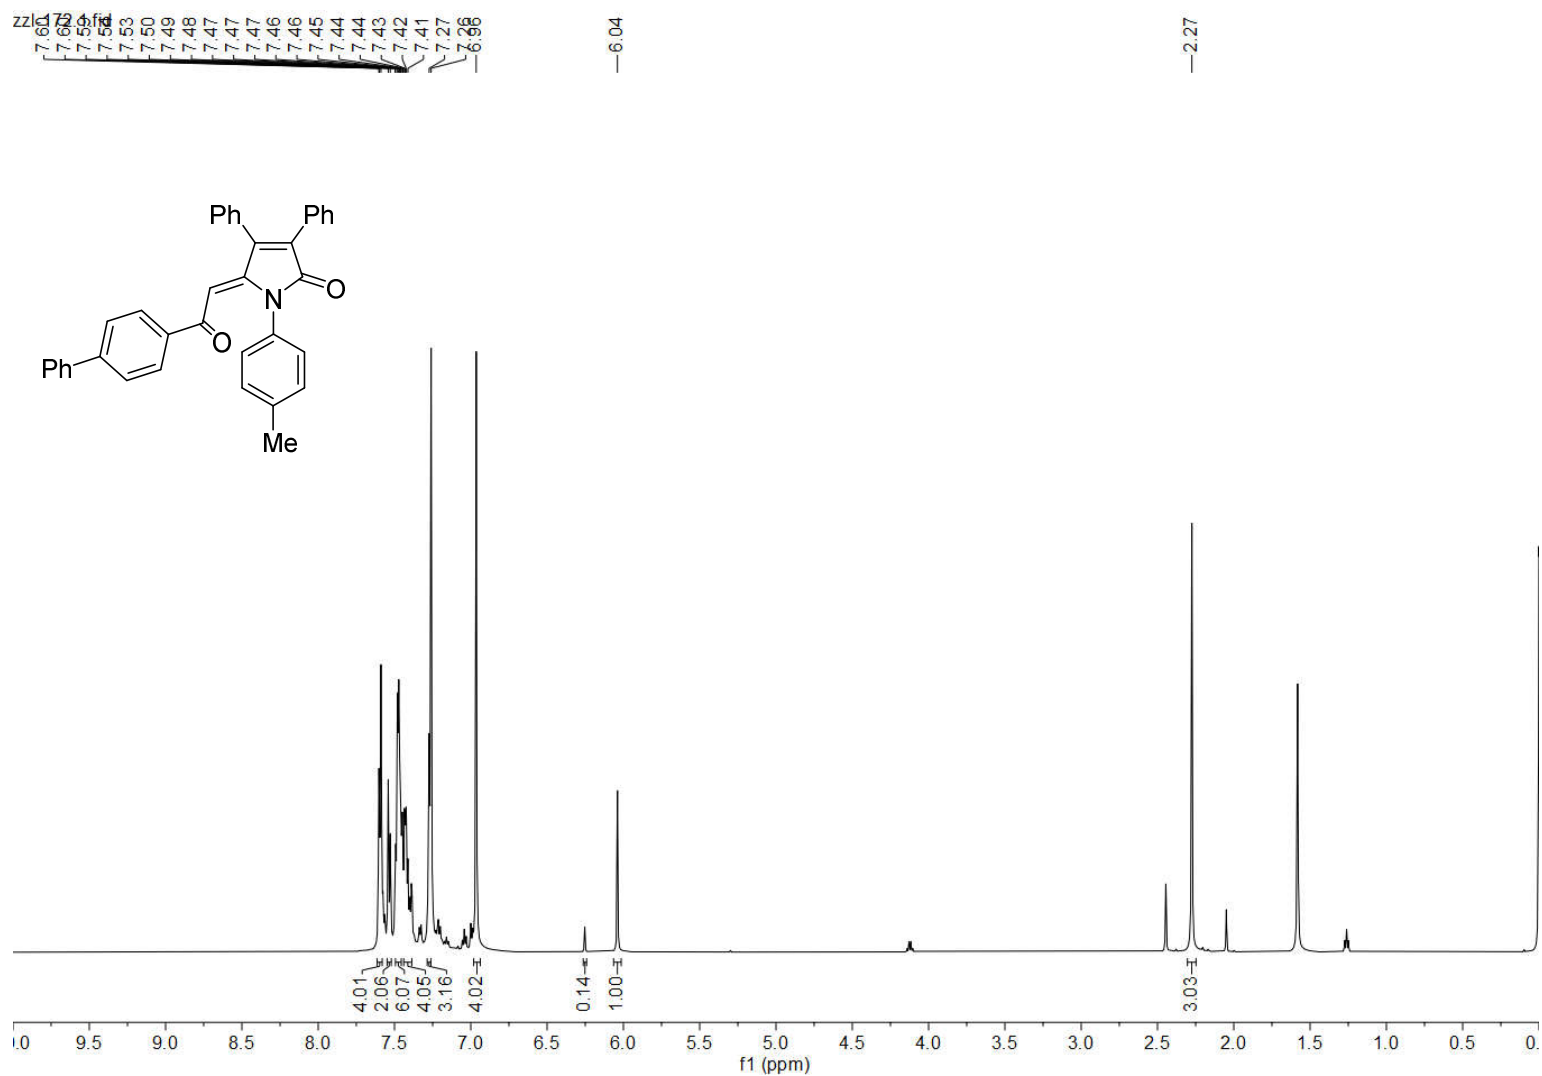

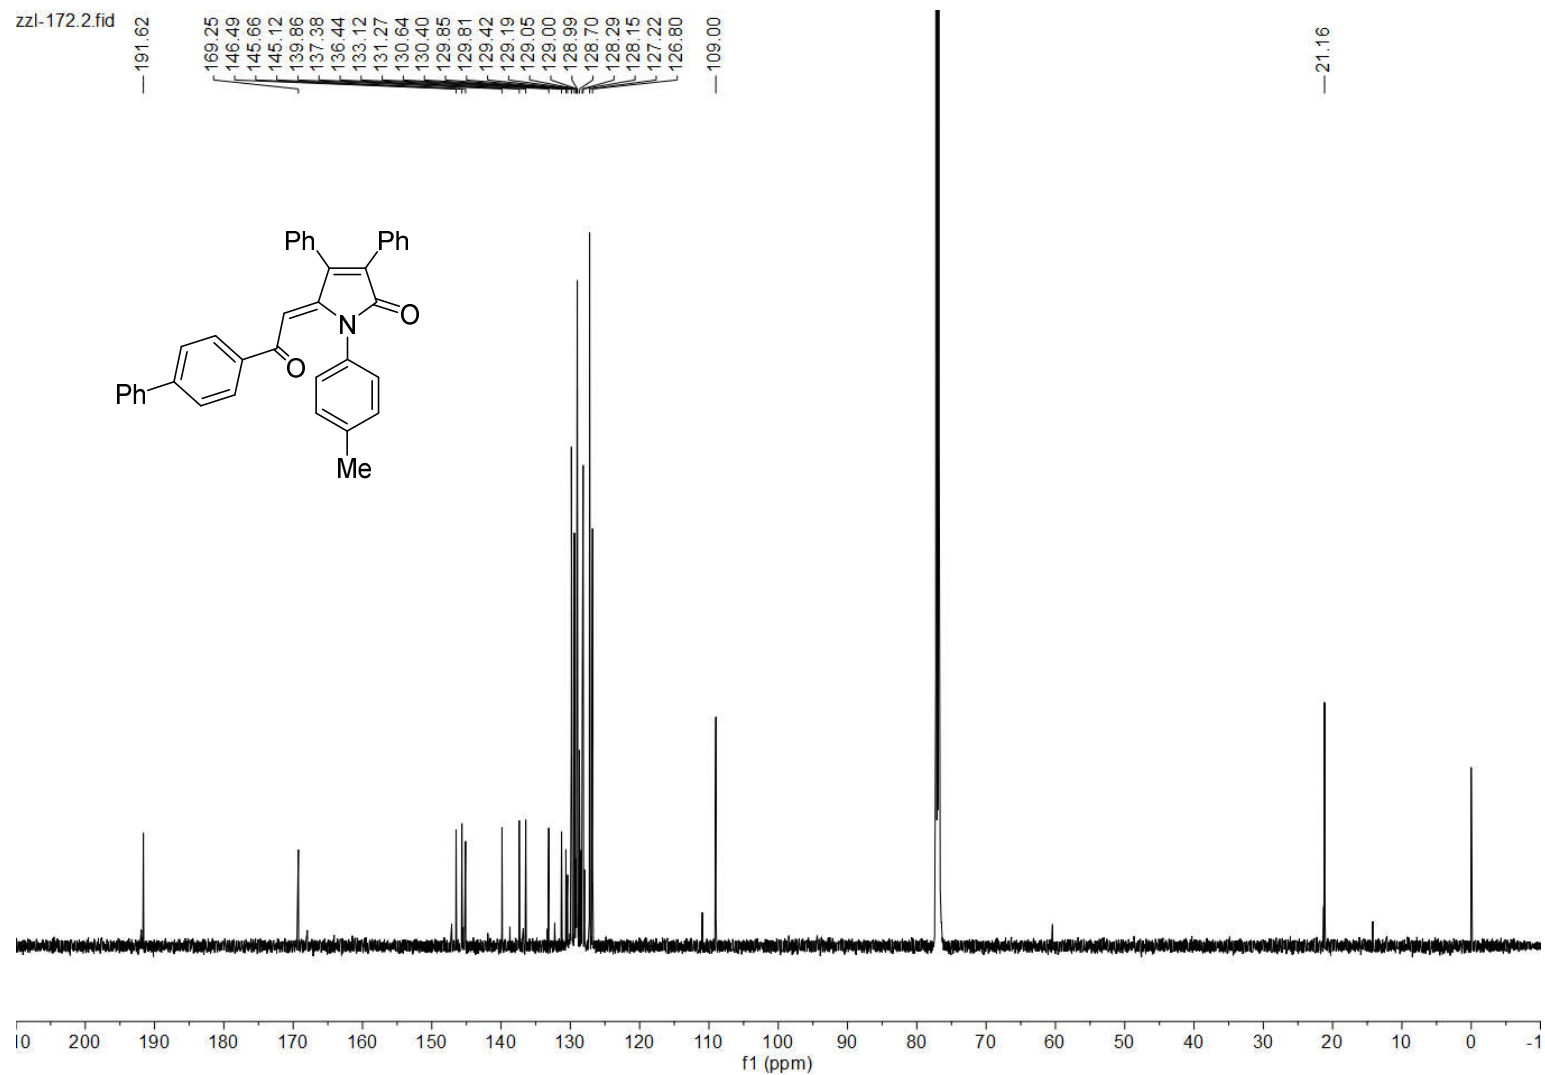

Figure S139.  $^{13}\text{C}$  NMR (150 MHz,  $\text{CDCl}_3$ ) spectra of compound 7f



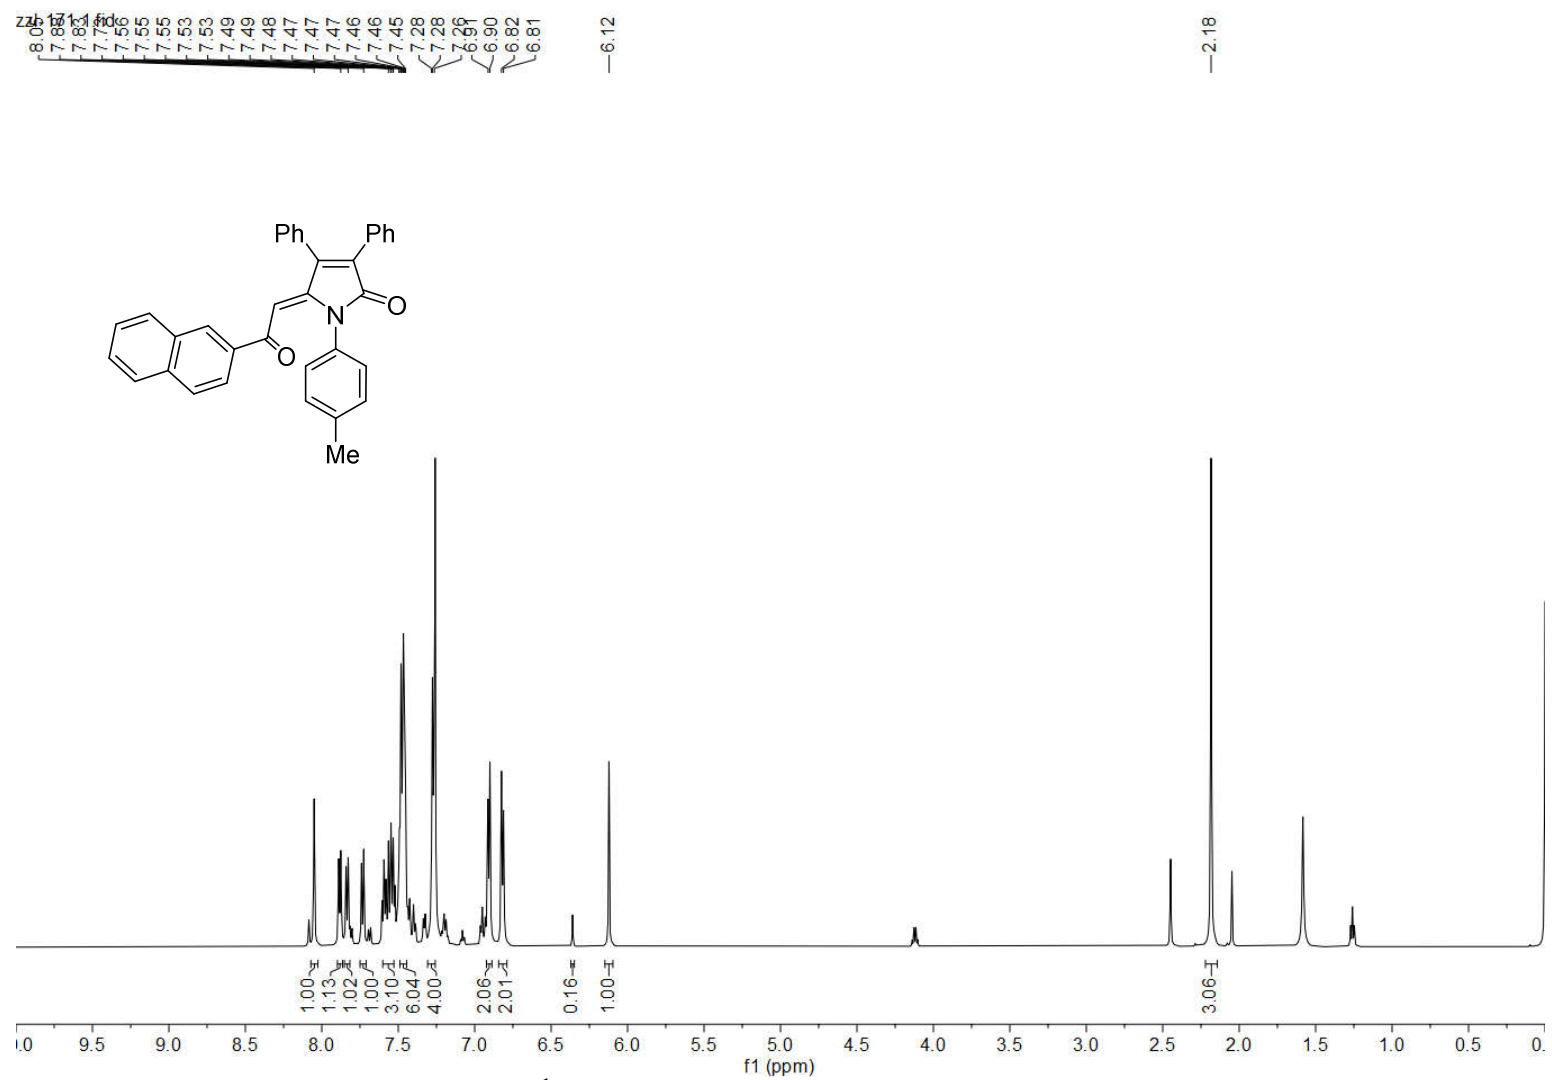

**Figure S140.** <sup>1</sup>H NMR (600 MHz, CDCl<sub>3</sub>) spectra of compound 7g

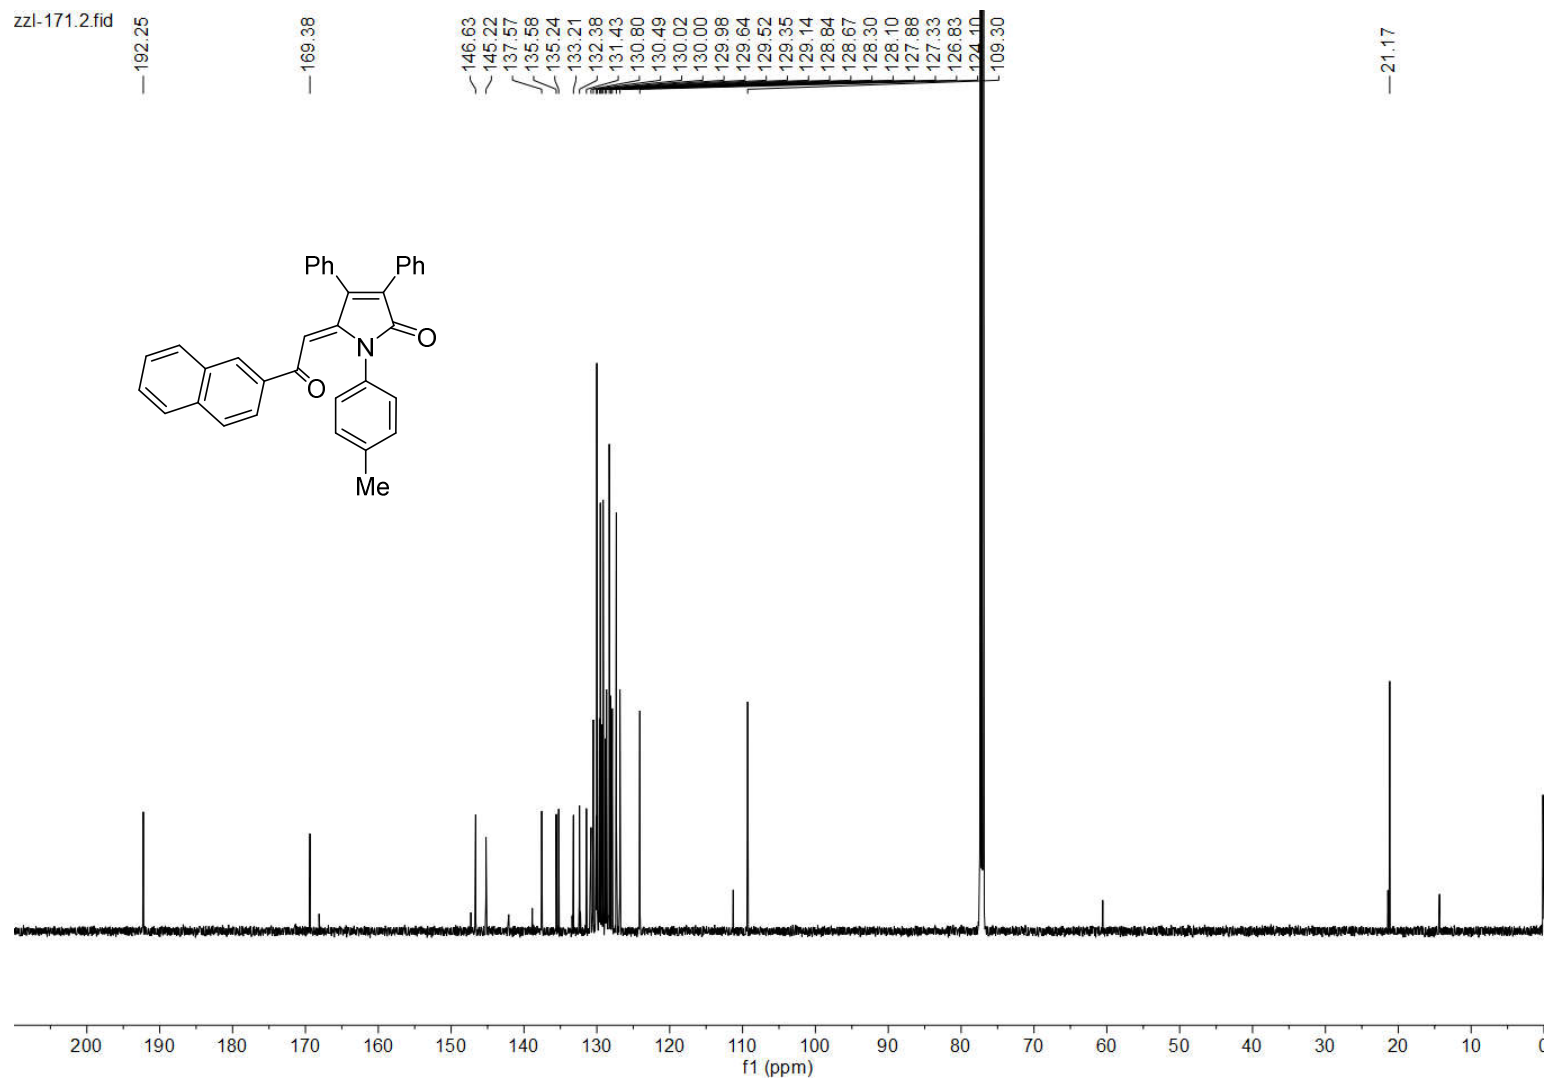

**Figure S141.**  $^{13}\text{C}$  NMR (150 MHz,  $\text{CDCl}_3$ ) spectra of compound **7g**

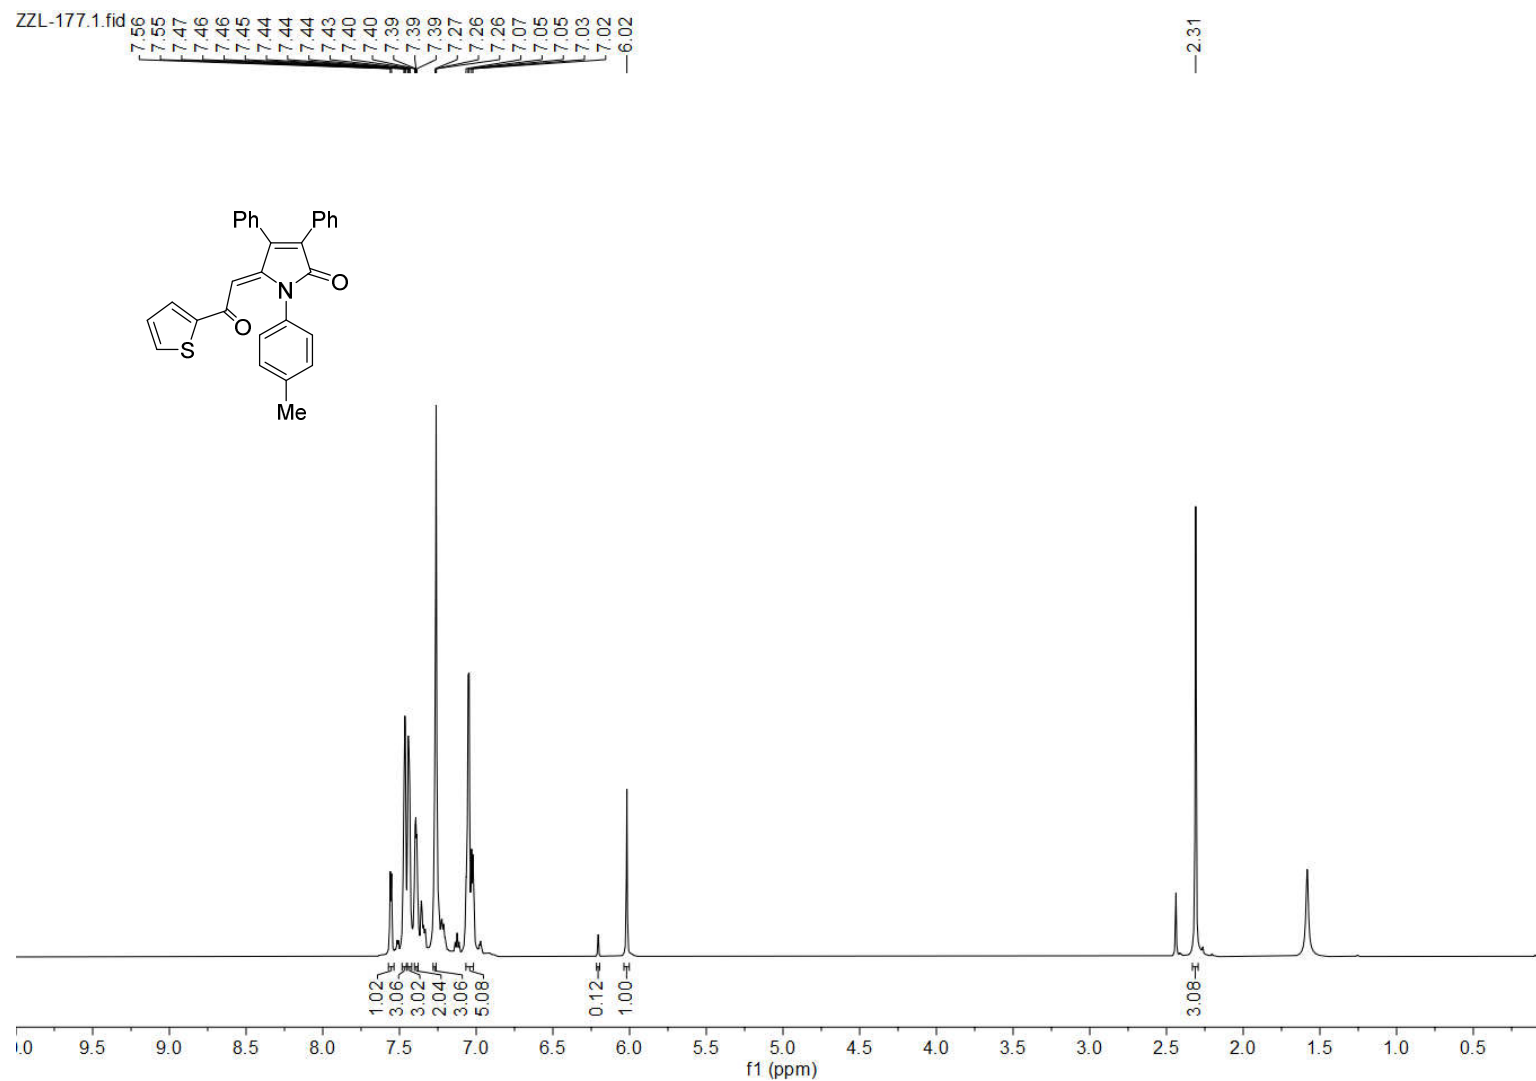

**Figure S142.**  $^1\text{H}$  NMR (600 MHz,  $\text{CDCl}_3$ ) spectra of compound **7h**

ZZL-177.2.fid

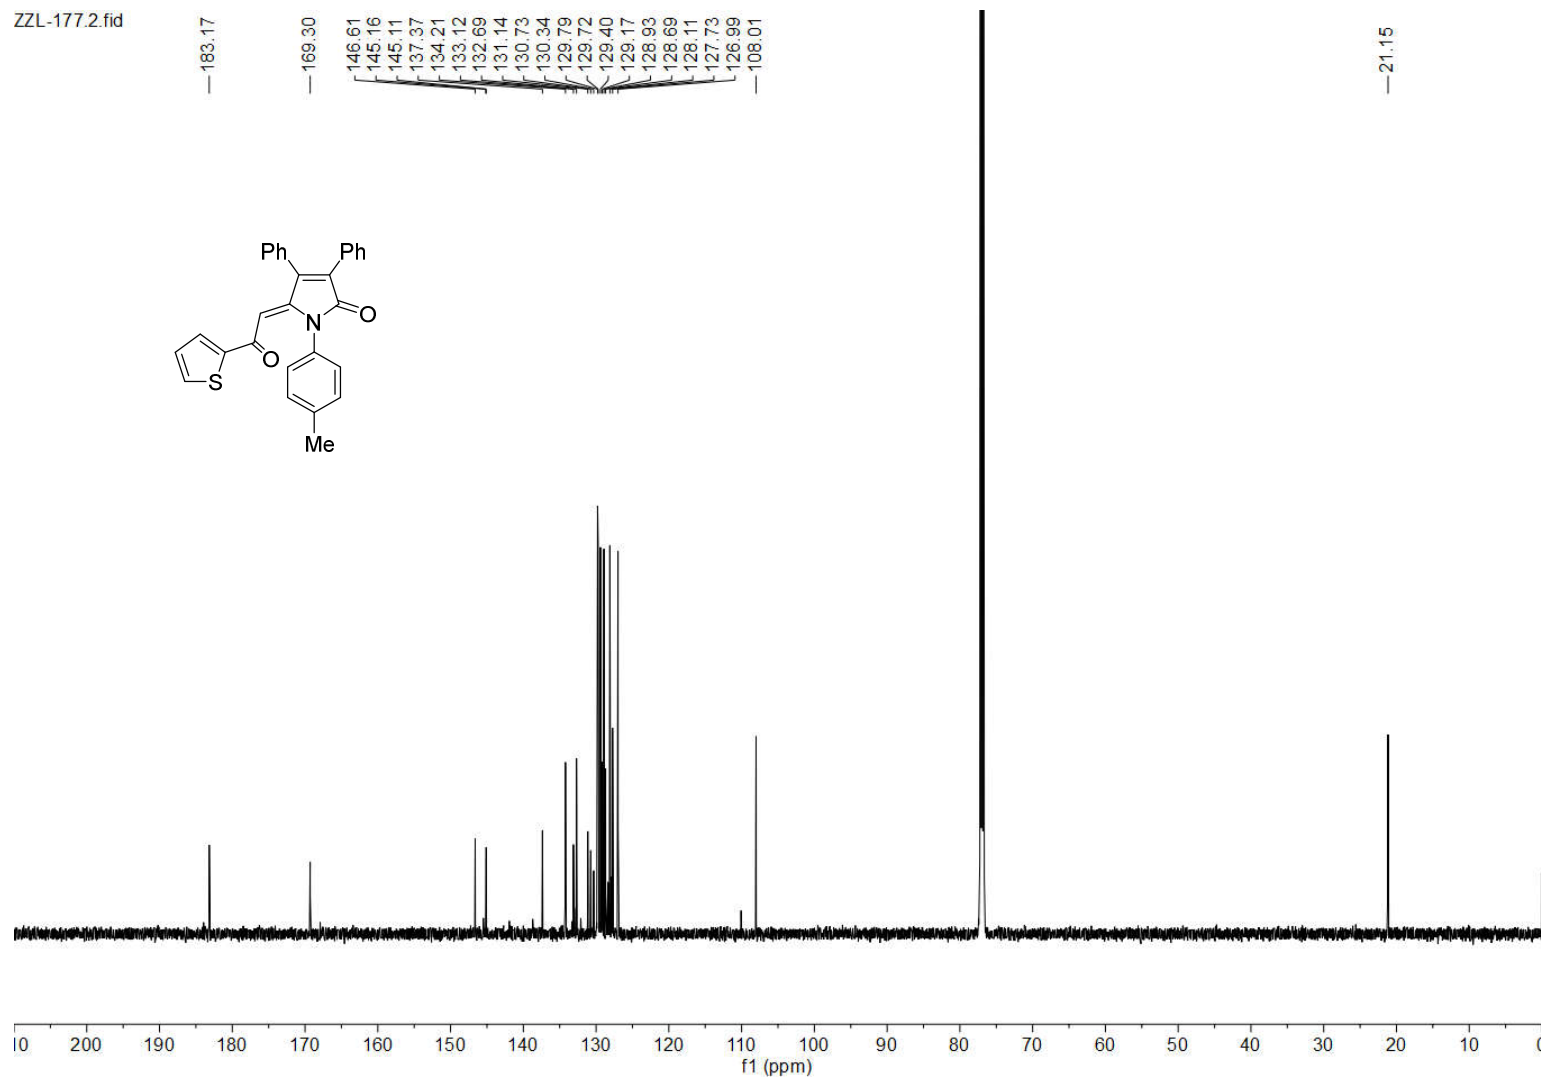

Figure S143. <sup>13</sup>C NMR (150 MHz, CDCl<sub>3</sub>) spectra of compound 7h

ZZL-176.1.fid

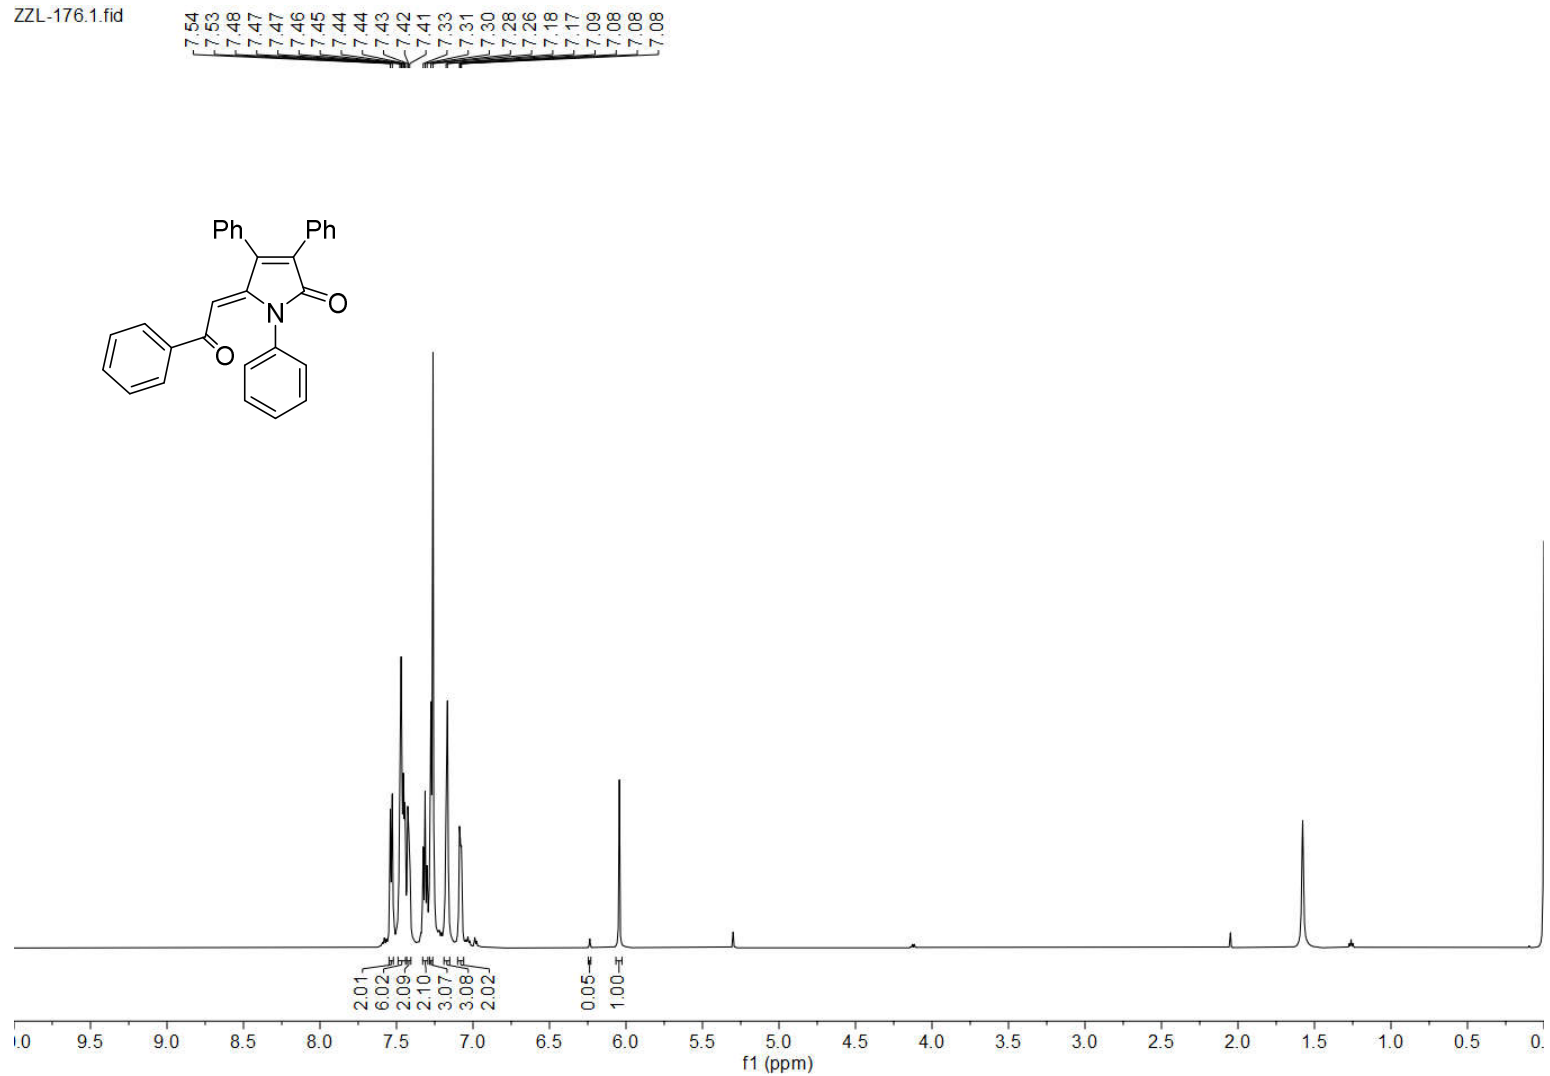

Figure S144. <sup>1</sup>H NMR (600 MHz, CDCl<sub>3</sub>) spectra of compound **7i**

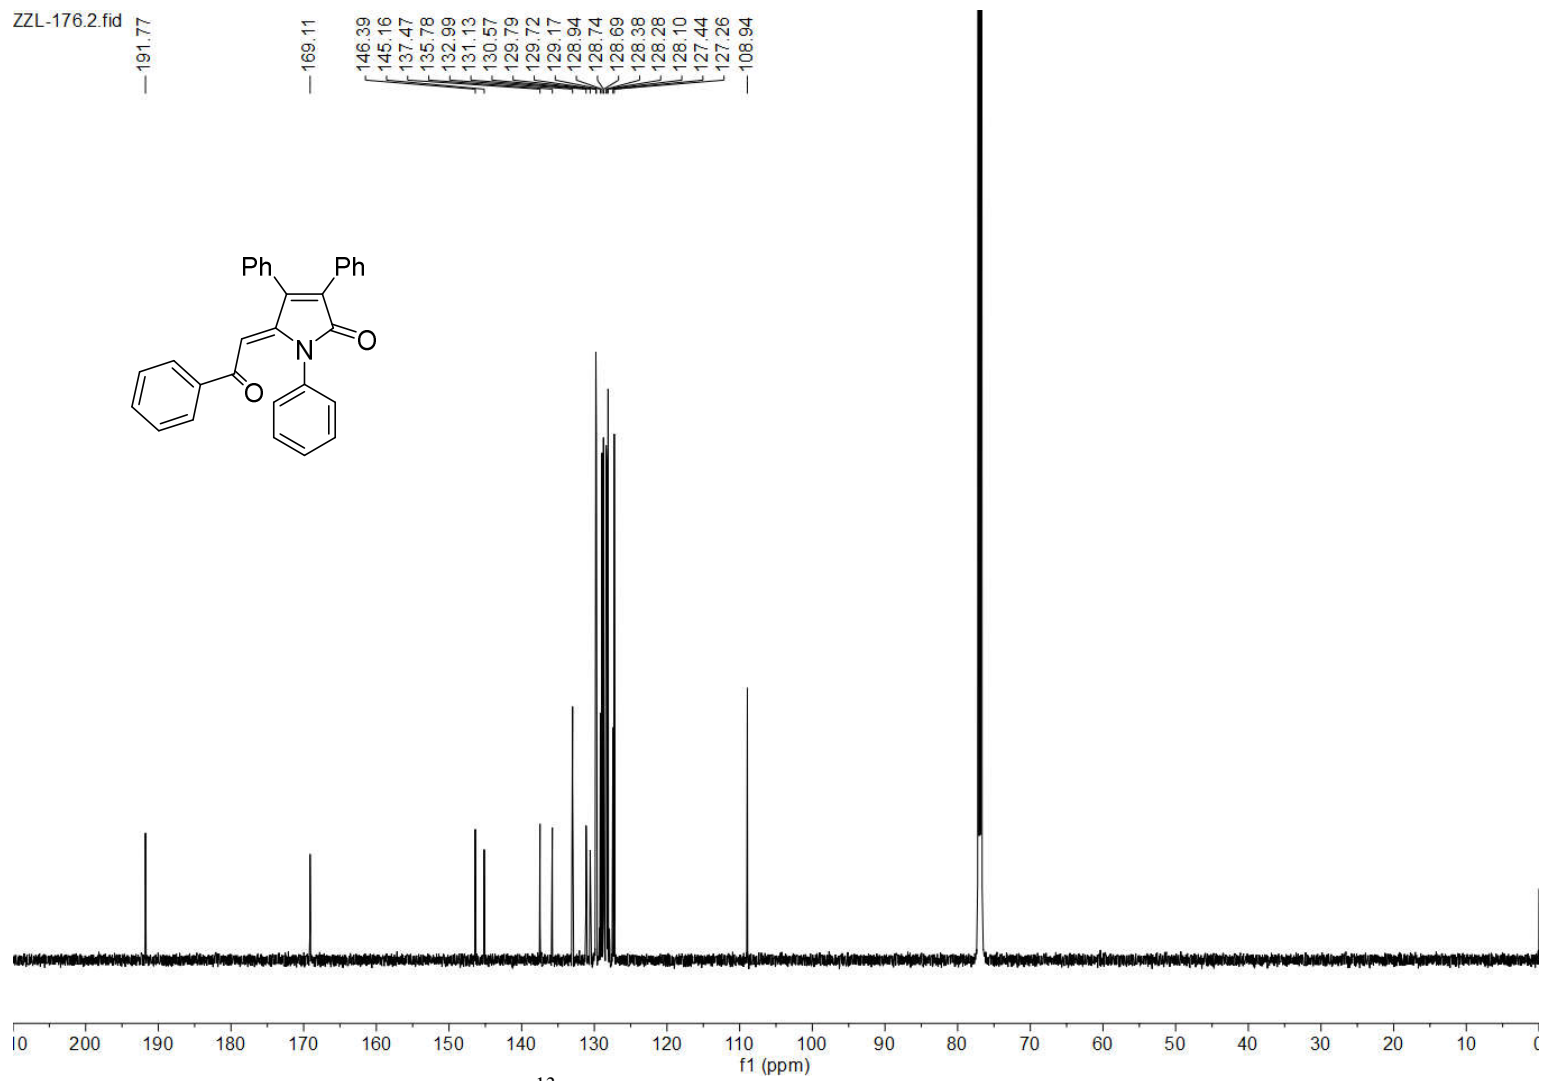

Figure S145. <sup>13</sup>C NMR (150 MHz, CDCl<sub>3</sub>) spectra of compound 7i

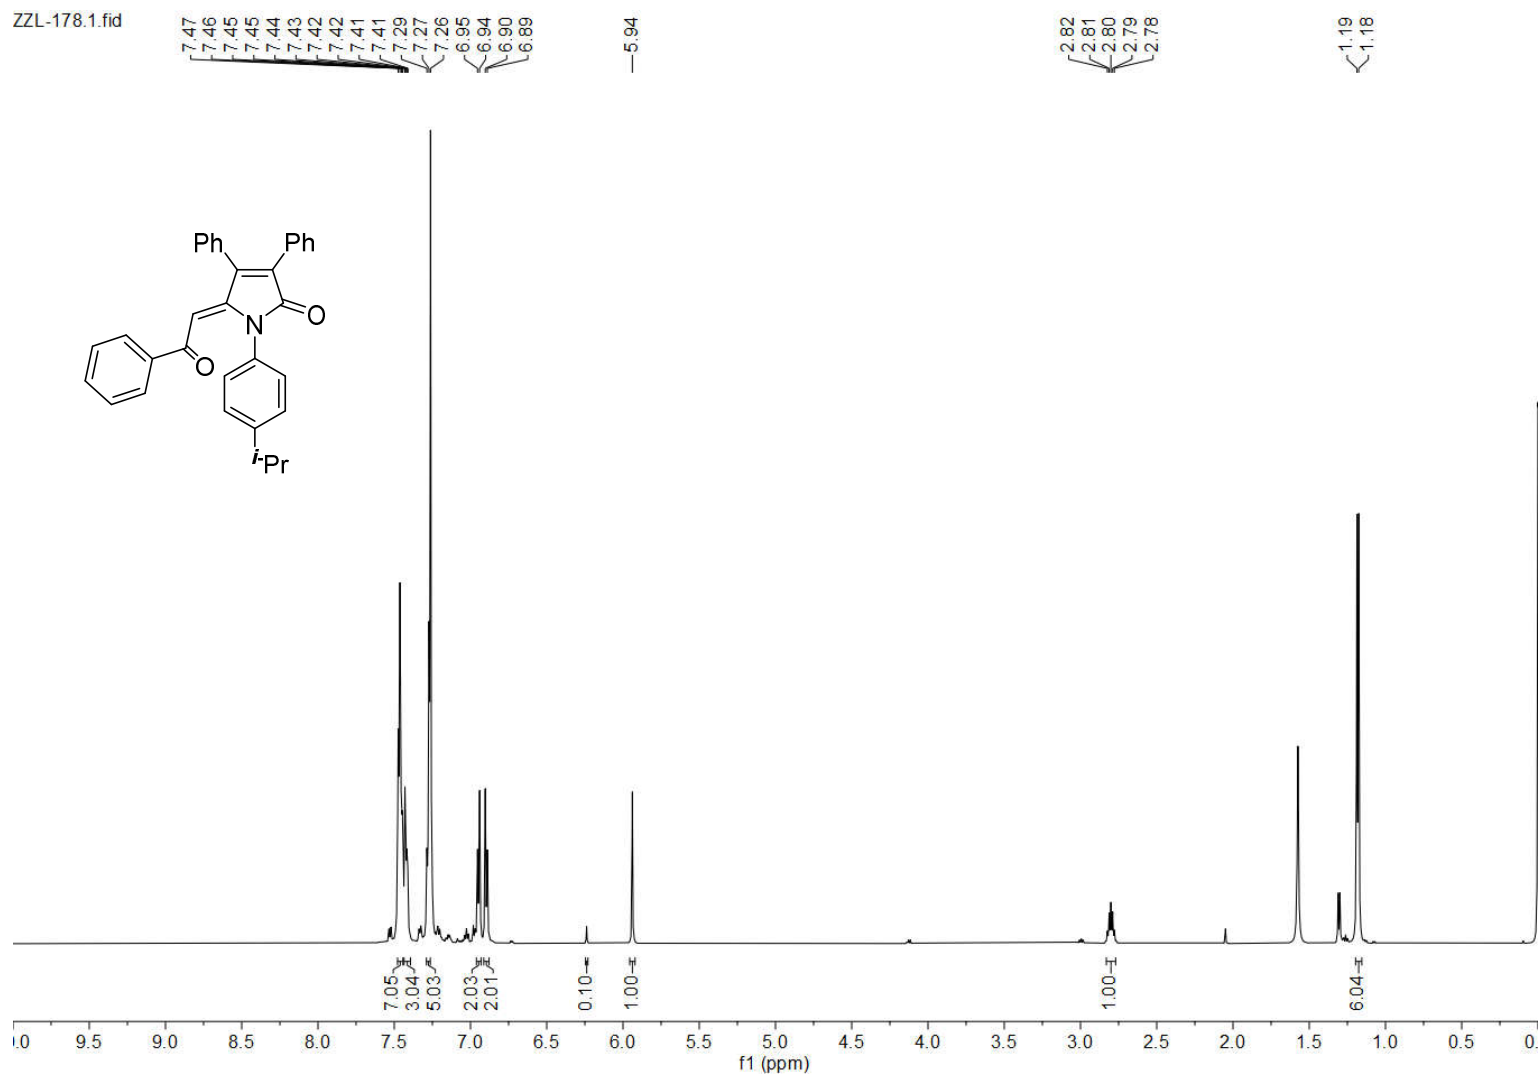

Figure S146.  $^1\text{H}$  NMR (600 MHz,  $\text{CDCl}_3$ ) spectra of compound 7j

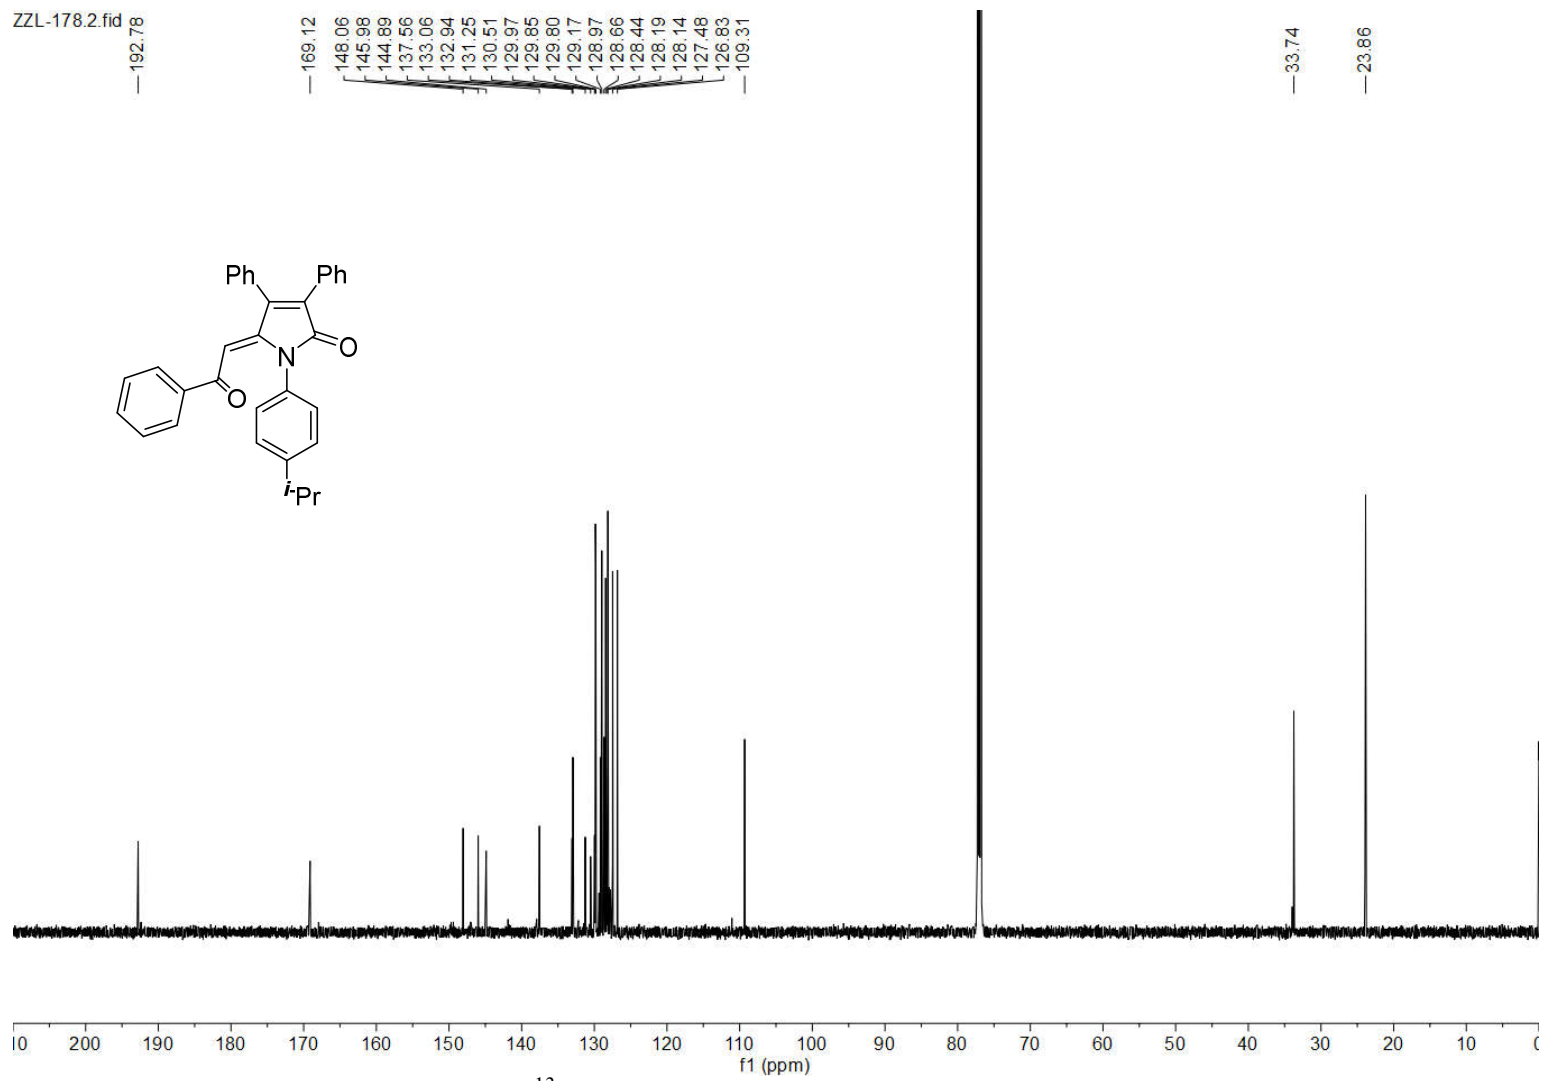

Figure S147. <sup>13</sup>C NMR (150 MHz, CDCl<sub>3</sub>) spectra of compound 7j



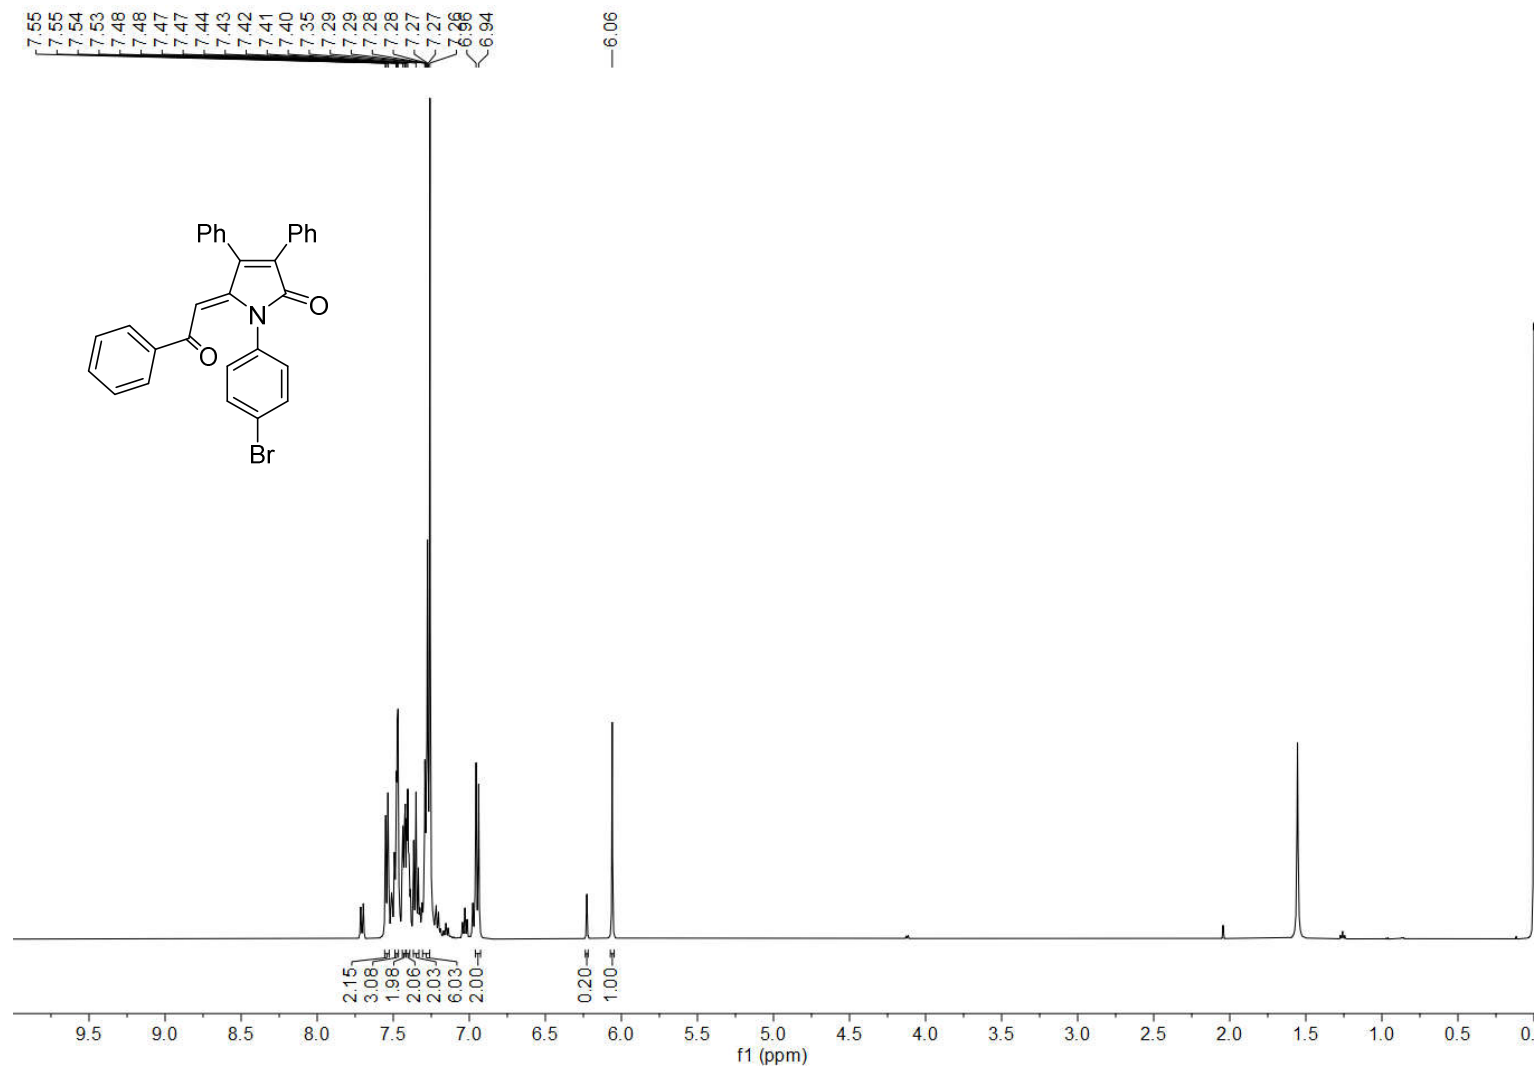

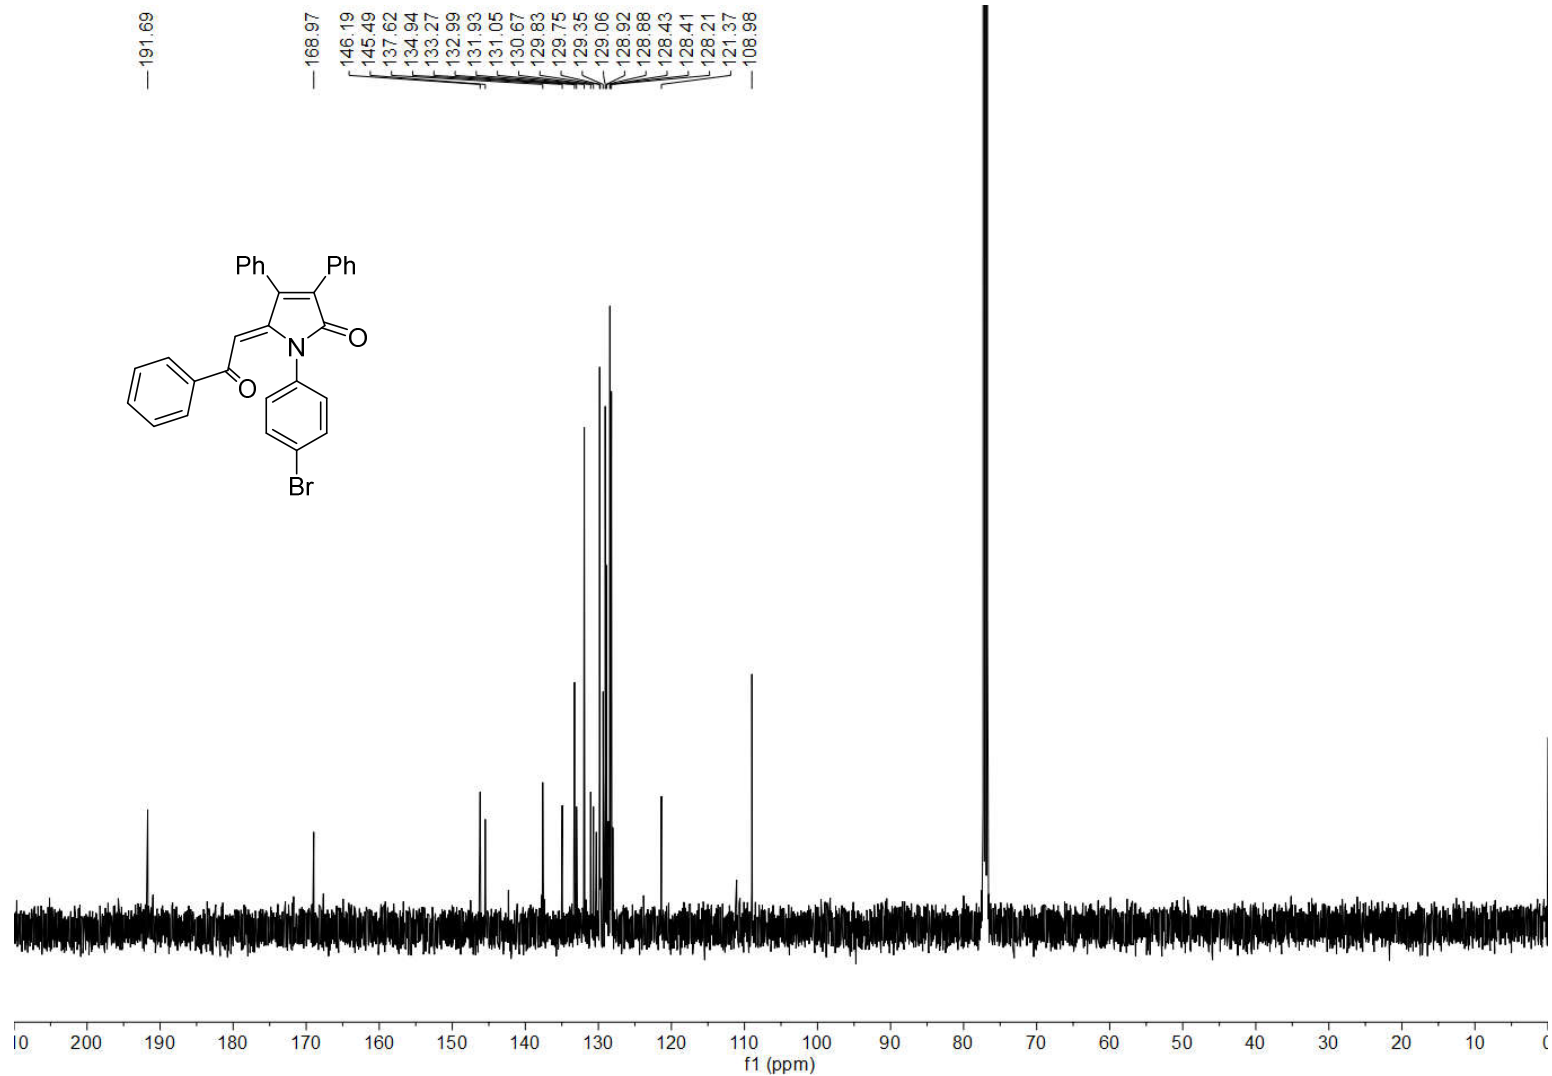

**Figure S149.** <sup>13</sup>C NMR (125 MHz, CDCl<sub>3</sub>) spectra of compound **7k**

ZZL-192-1.1.fig

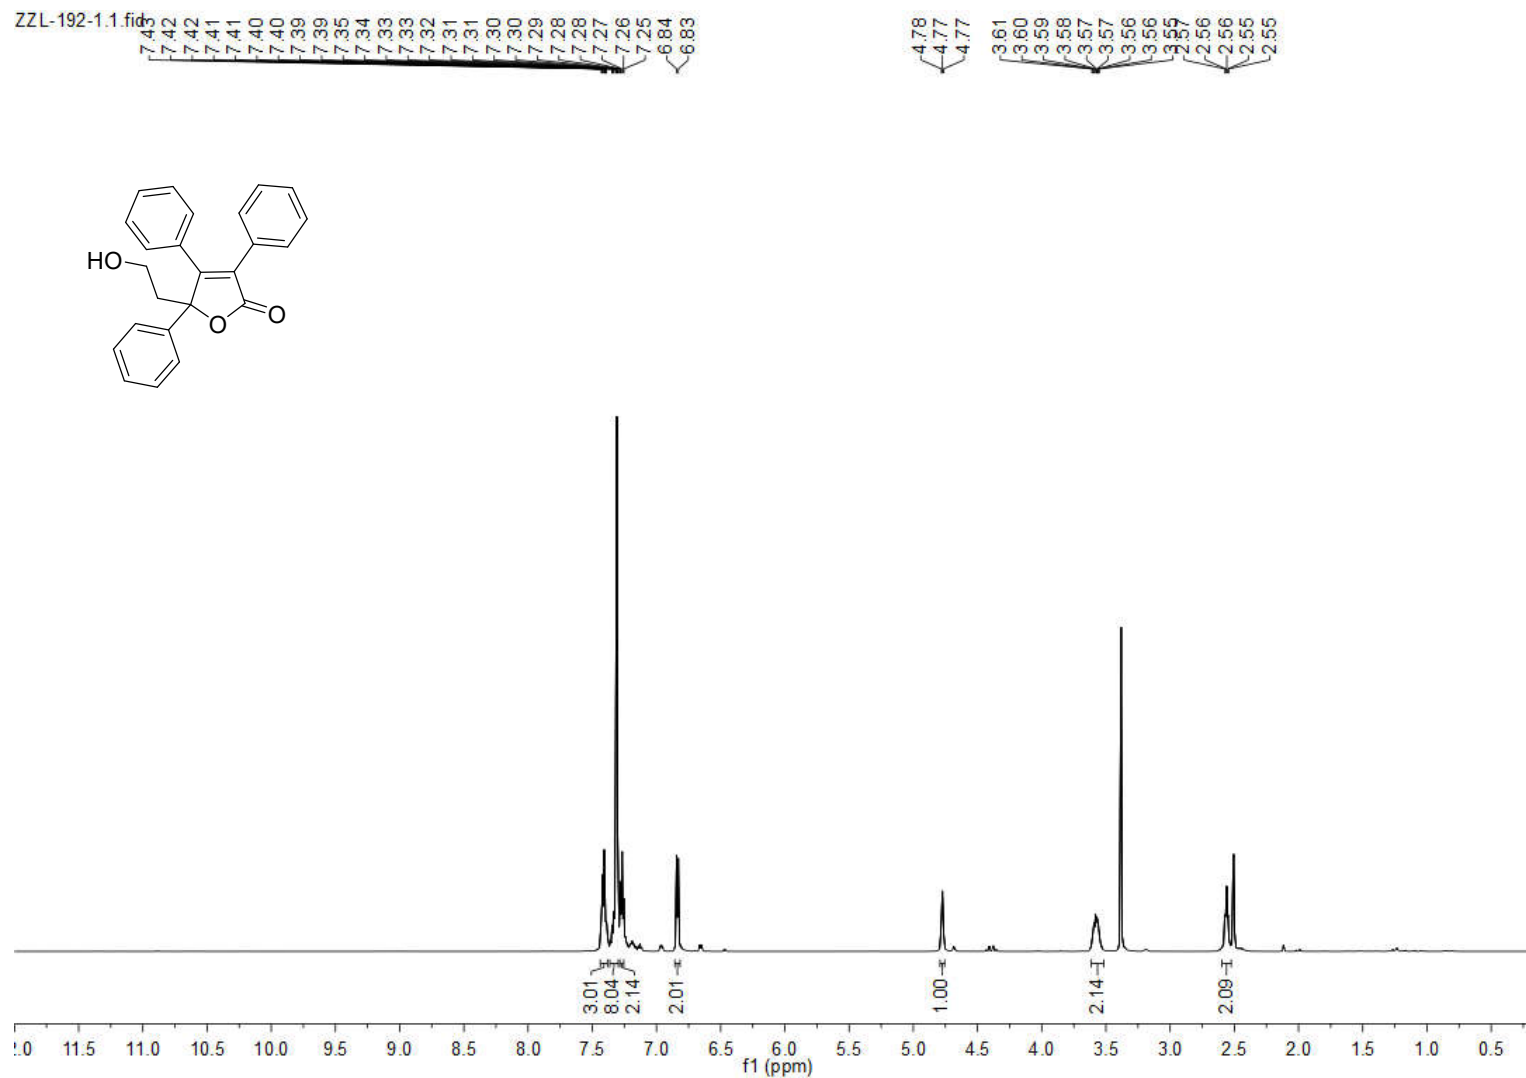

Figure S150. <sup>1</sup>H NMR (600 MHz, DMSO-*d*<sub>6</sub>) spectra of compound 8

ZZL-192-1.2.fid

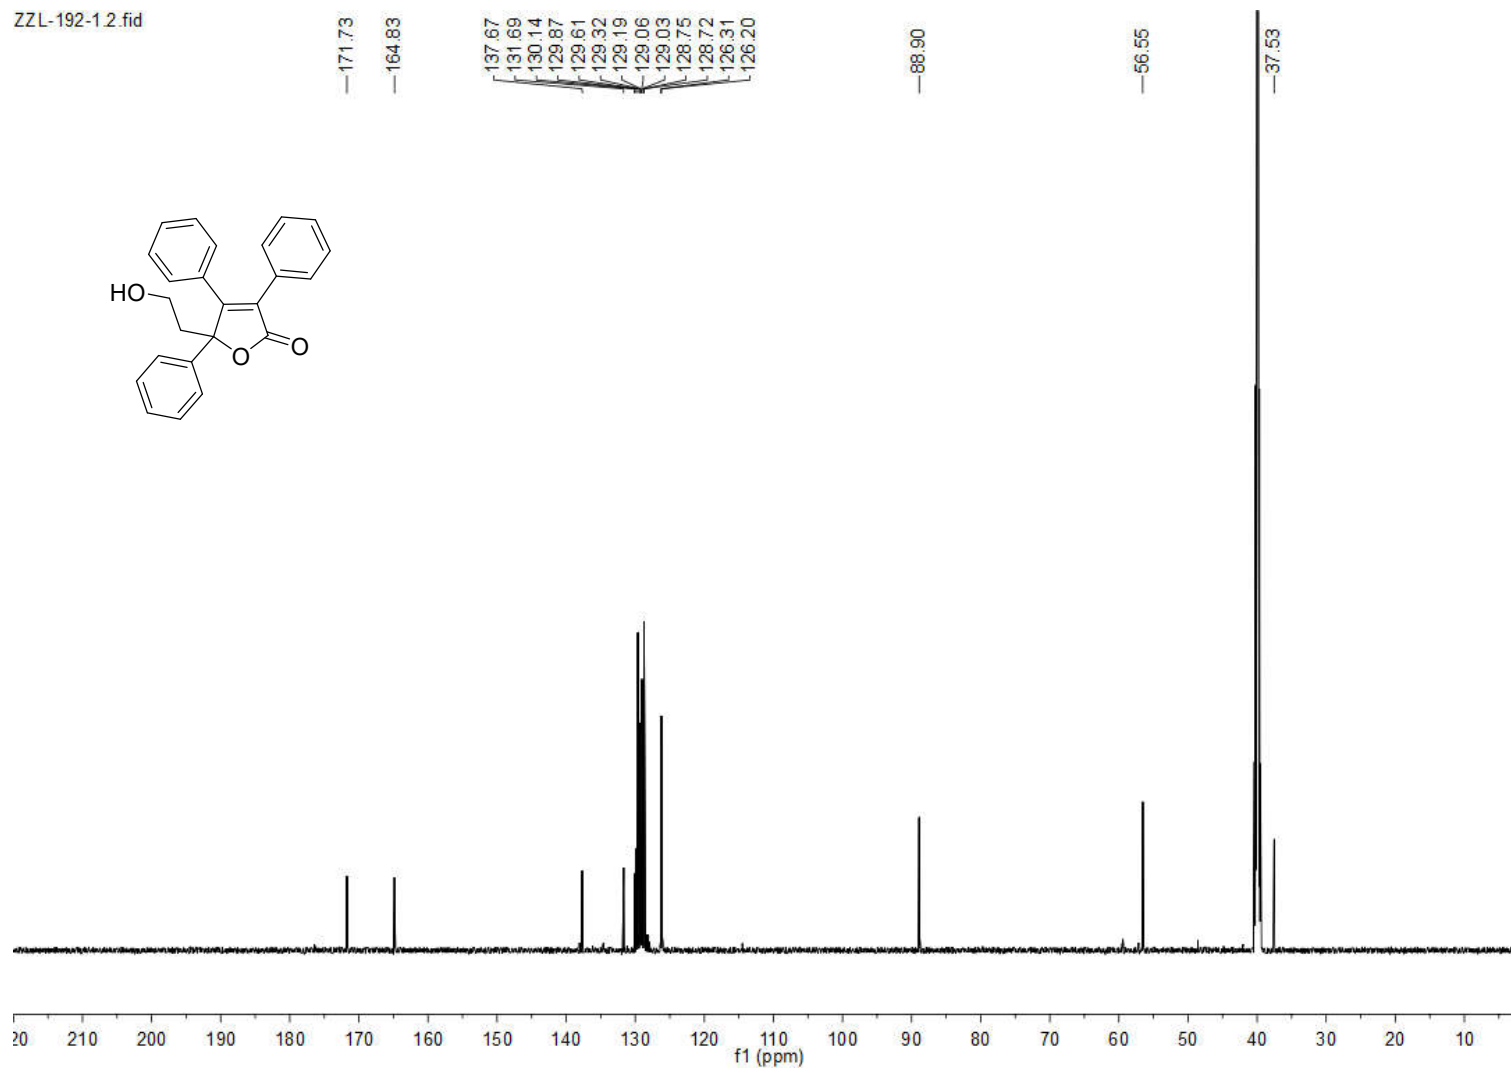

Figure S151.  $^{13}\text{C}$  NMR (150 MHz,  $\text{DMSO-}d_6$ ) spectra of compound 8

ZZL-200.1.fid

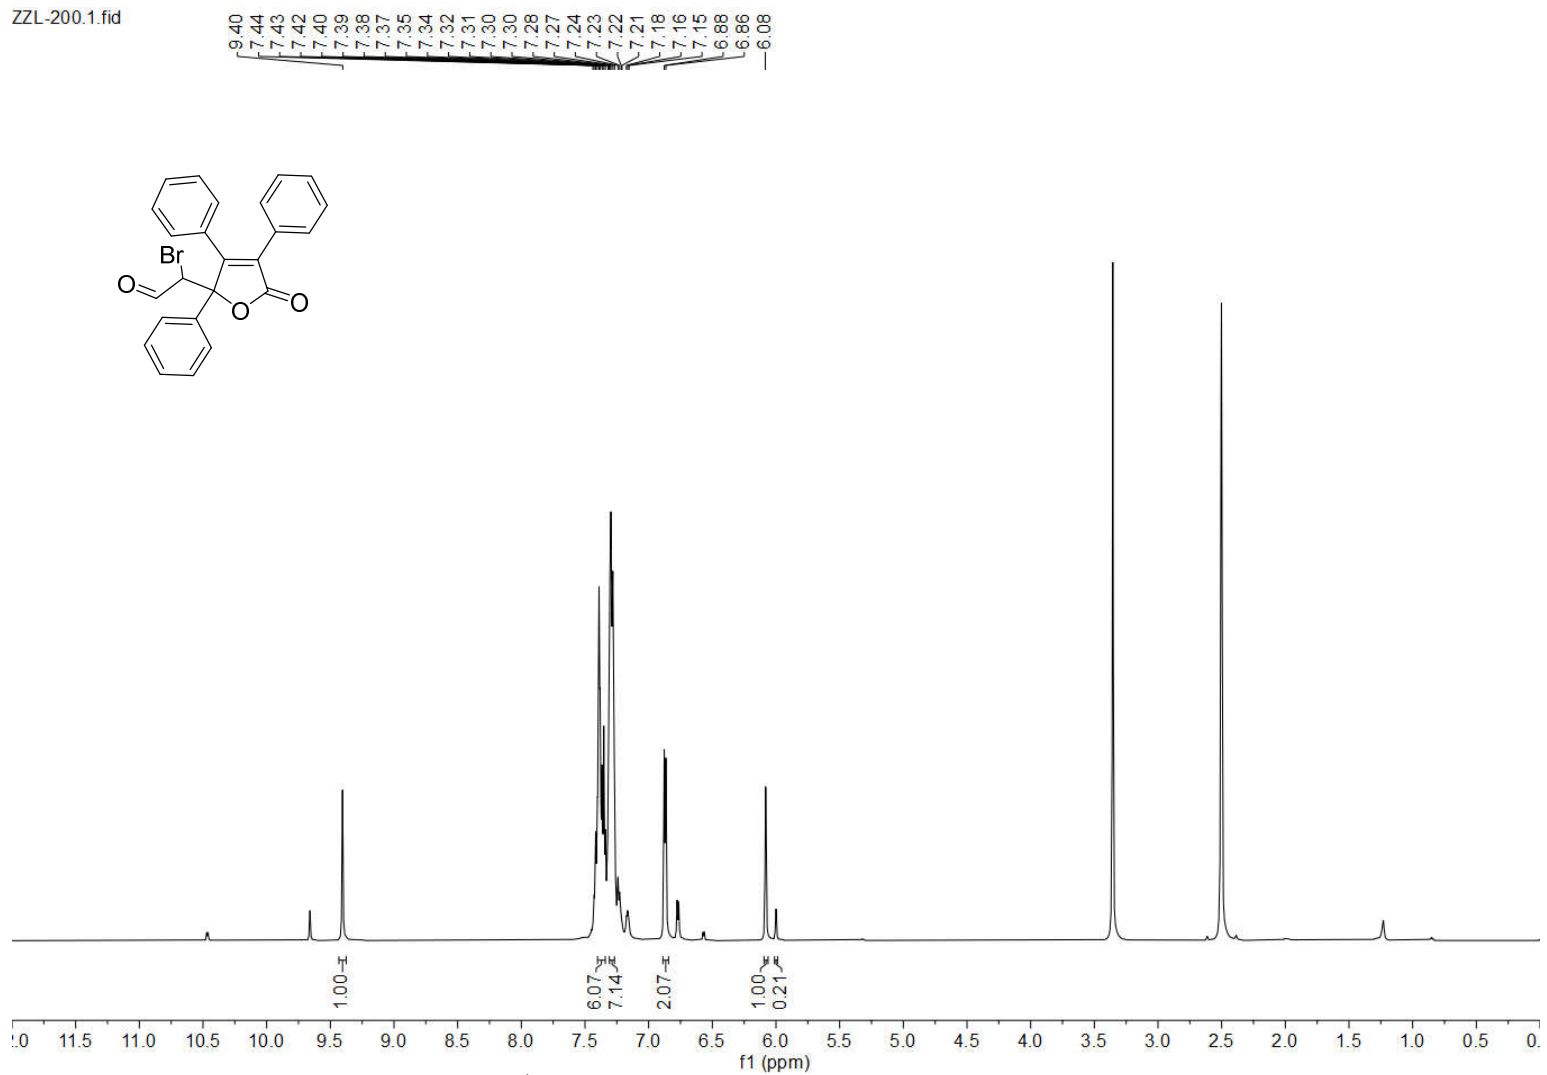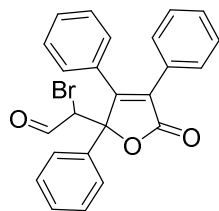

Figure S152.  $^1\text{H}$  NMR (600 MHz,  $\text{DMSO-}d_6$ ) spectra of compound **9**

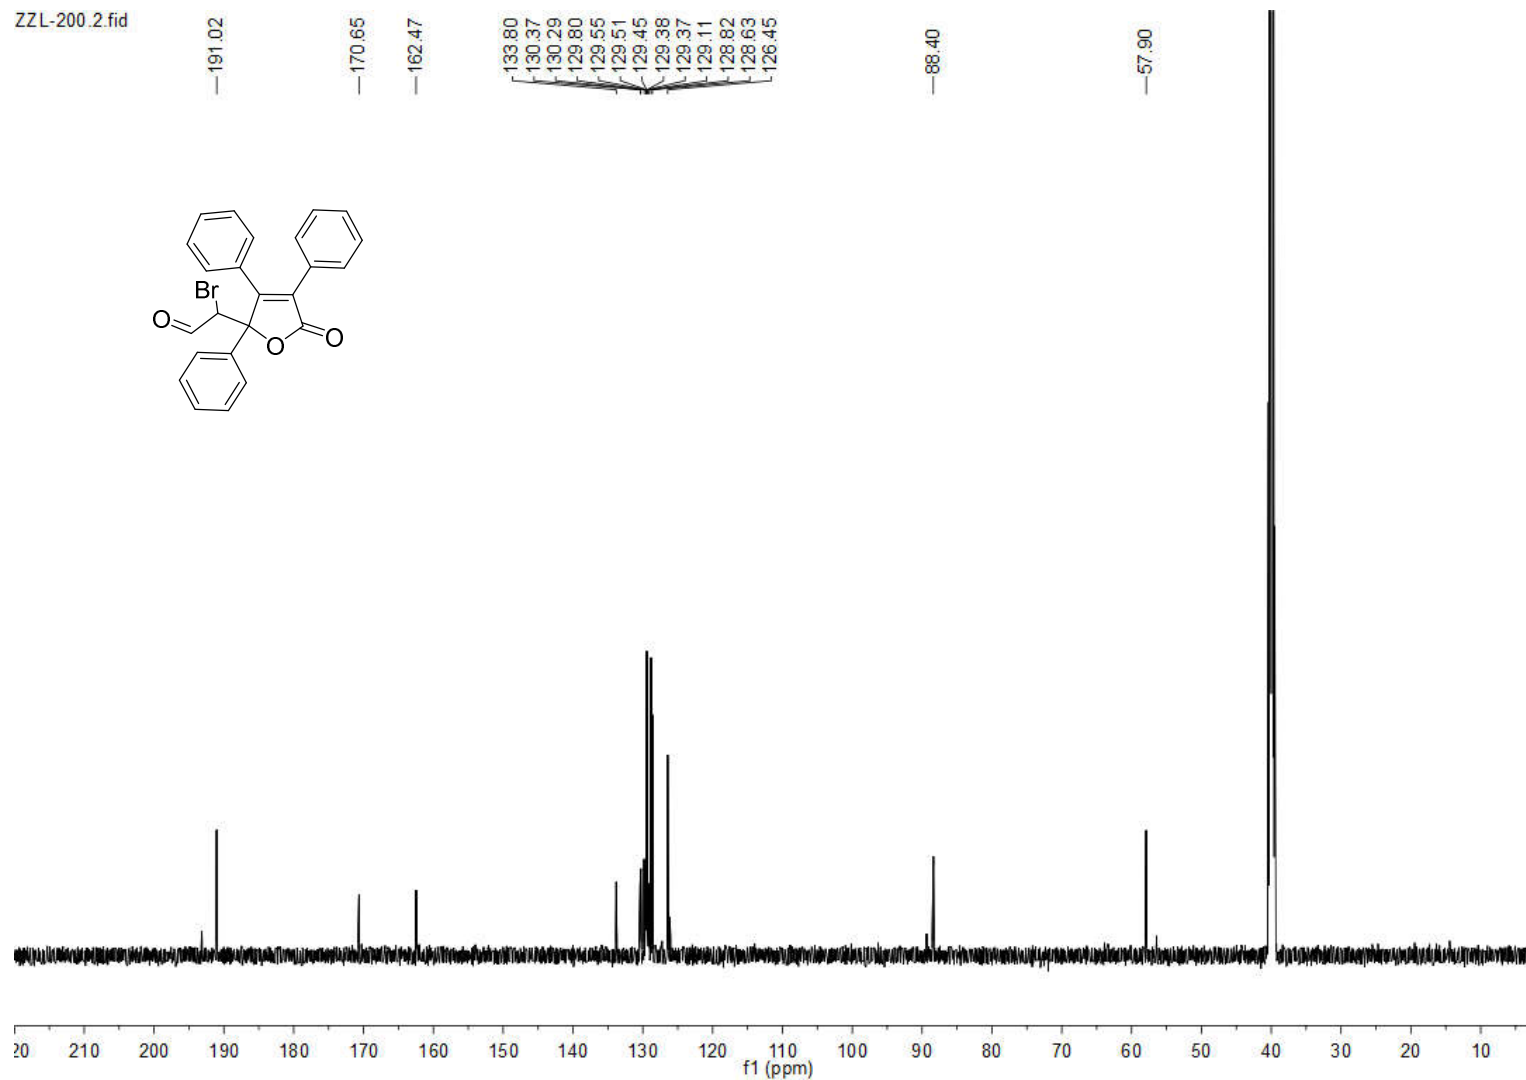

Figure S153.  $^{13}\text{C}$  NMR (150 MHz,  $\text{DMSO-}d_6$ ) spectra of compound 9

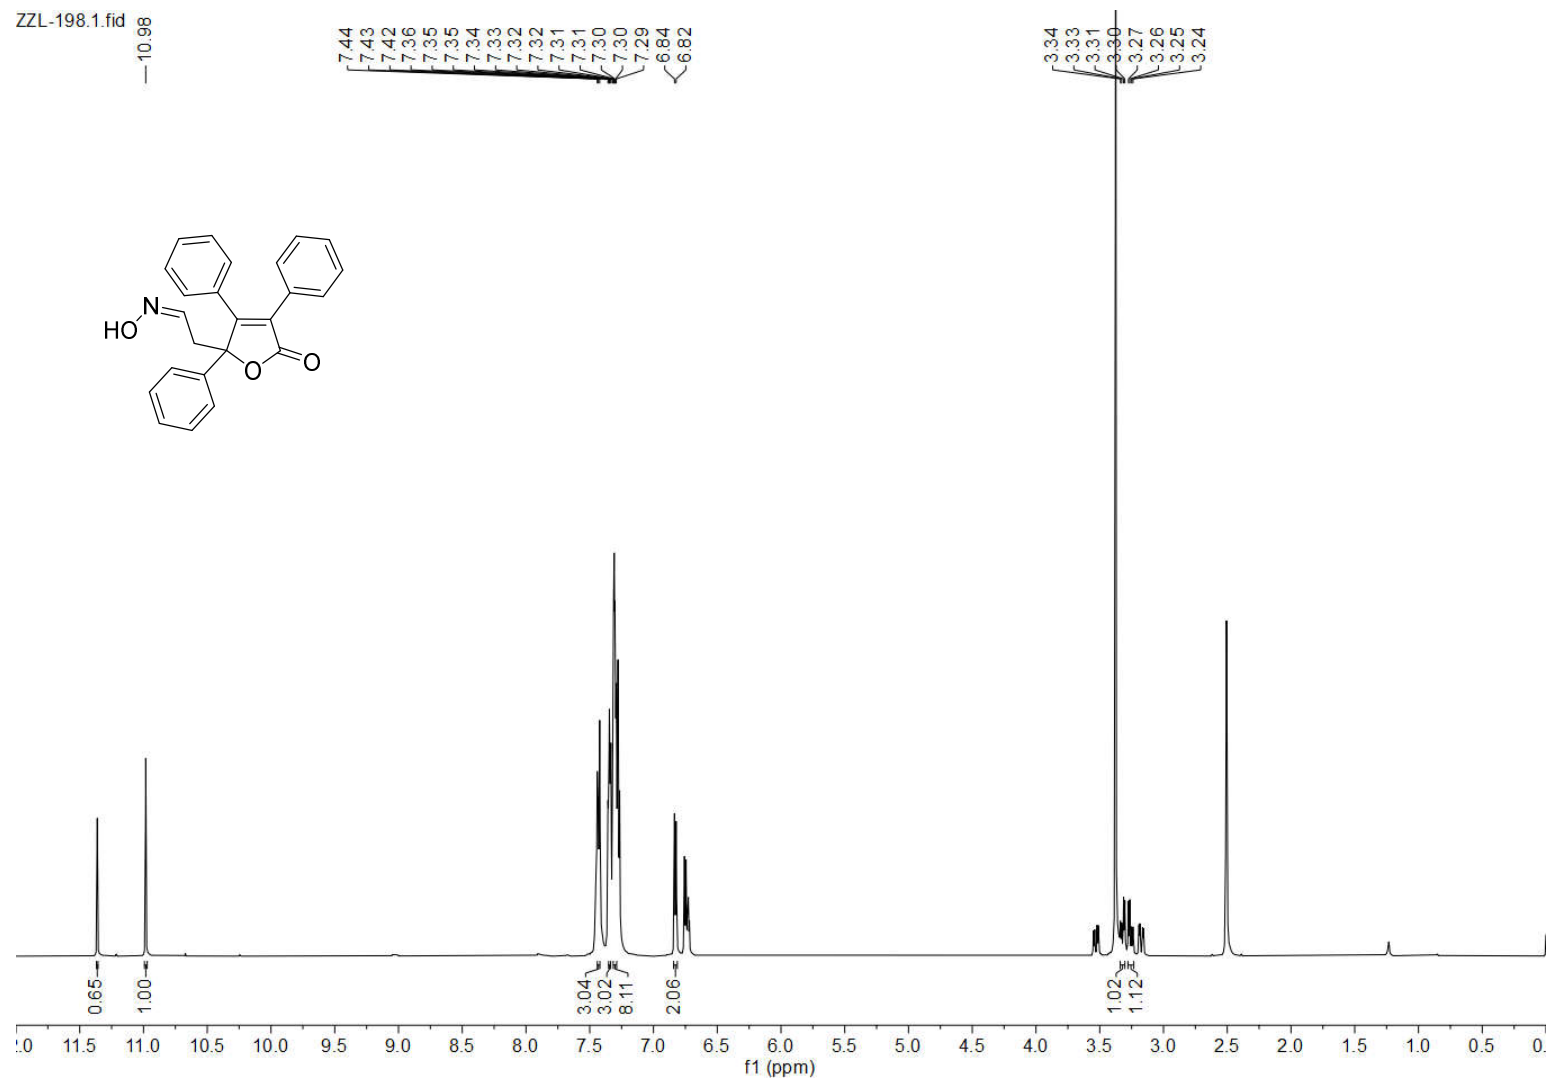

**Figure S154.**  $^1\text{H}$  NMR (600 MHz,  $\text{DMSO-}d_6$ ) spectra of compound **10**

ZZL-198.2.fid

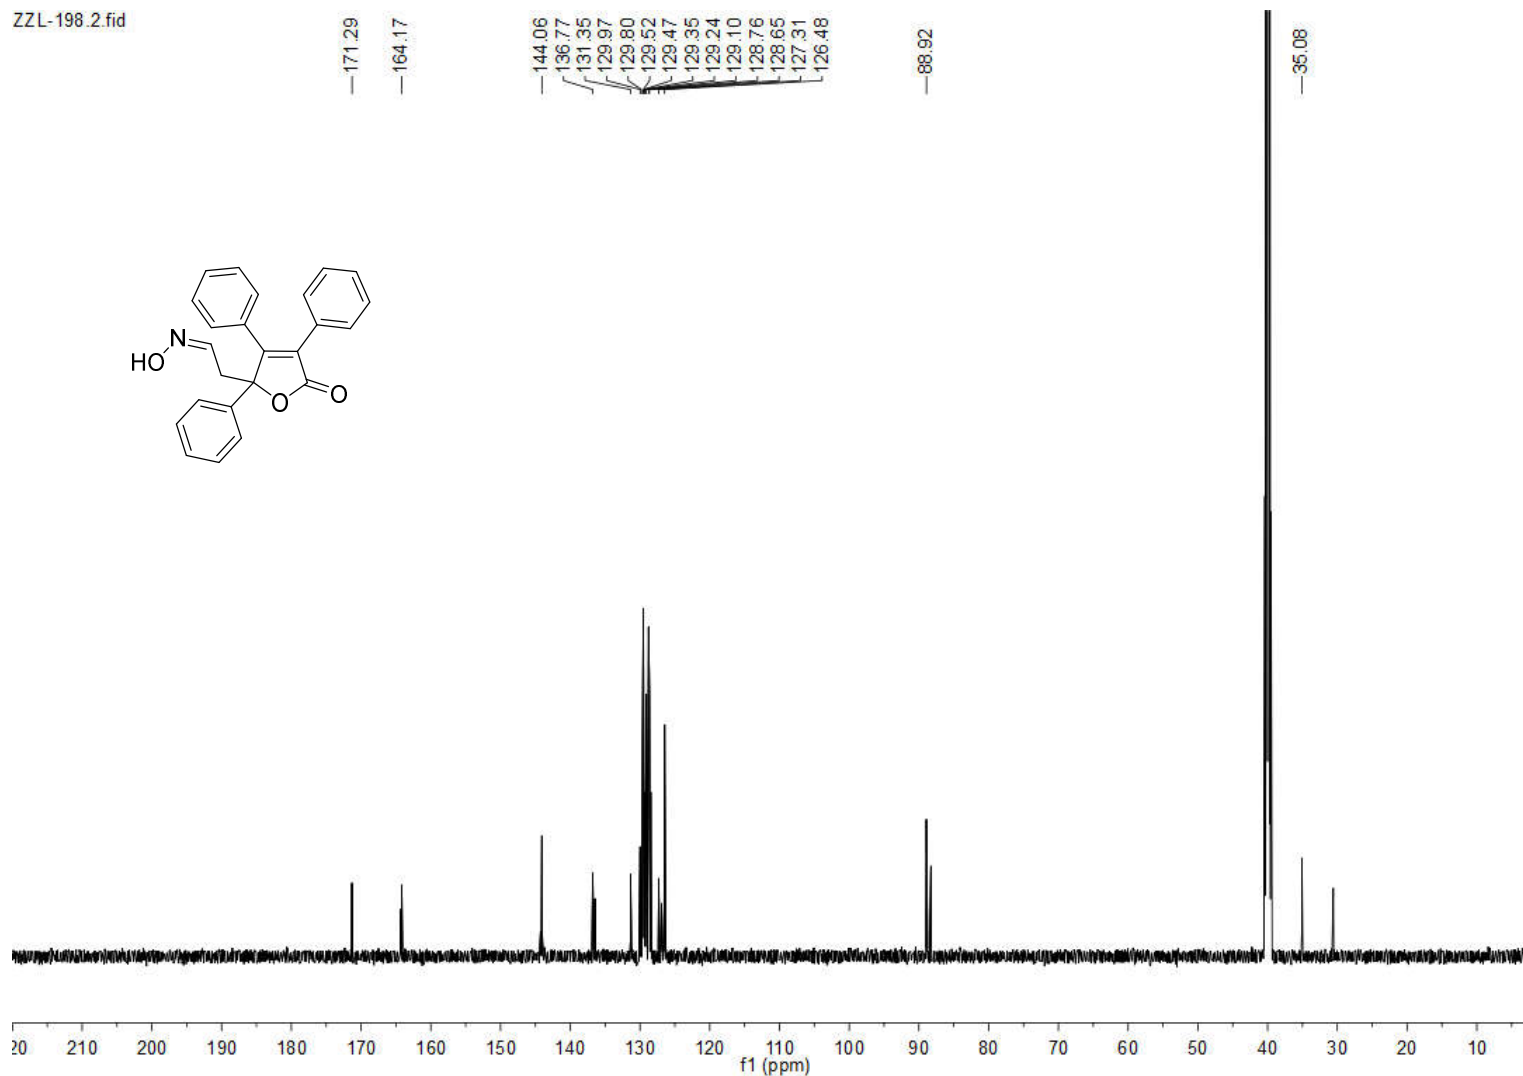

Figure S155.  $^{13}\text{C}$  NMR (150 MHz,  $\text{DMSO-}d_6$ ) spectra of compound 10



ZZL-201.1.fid

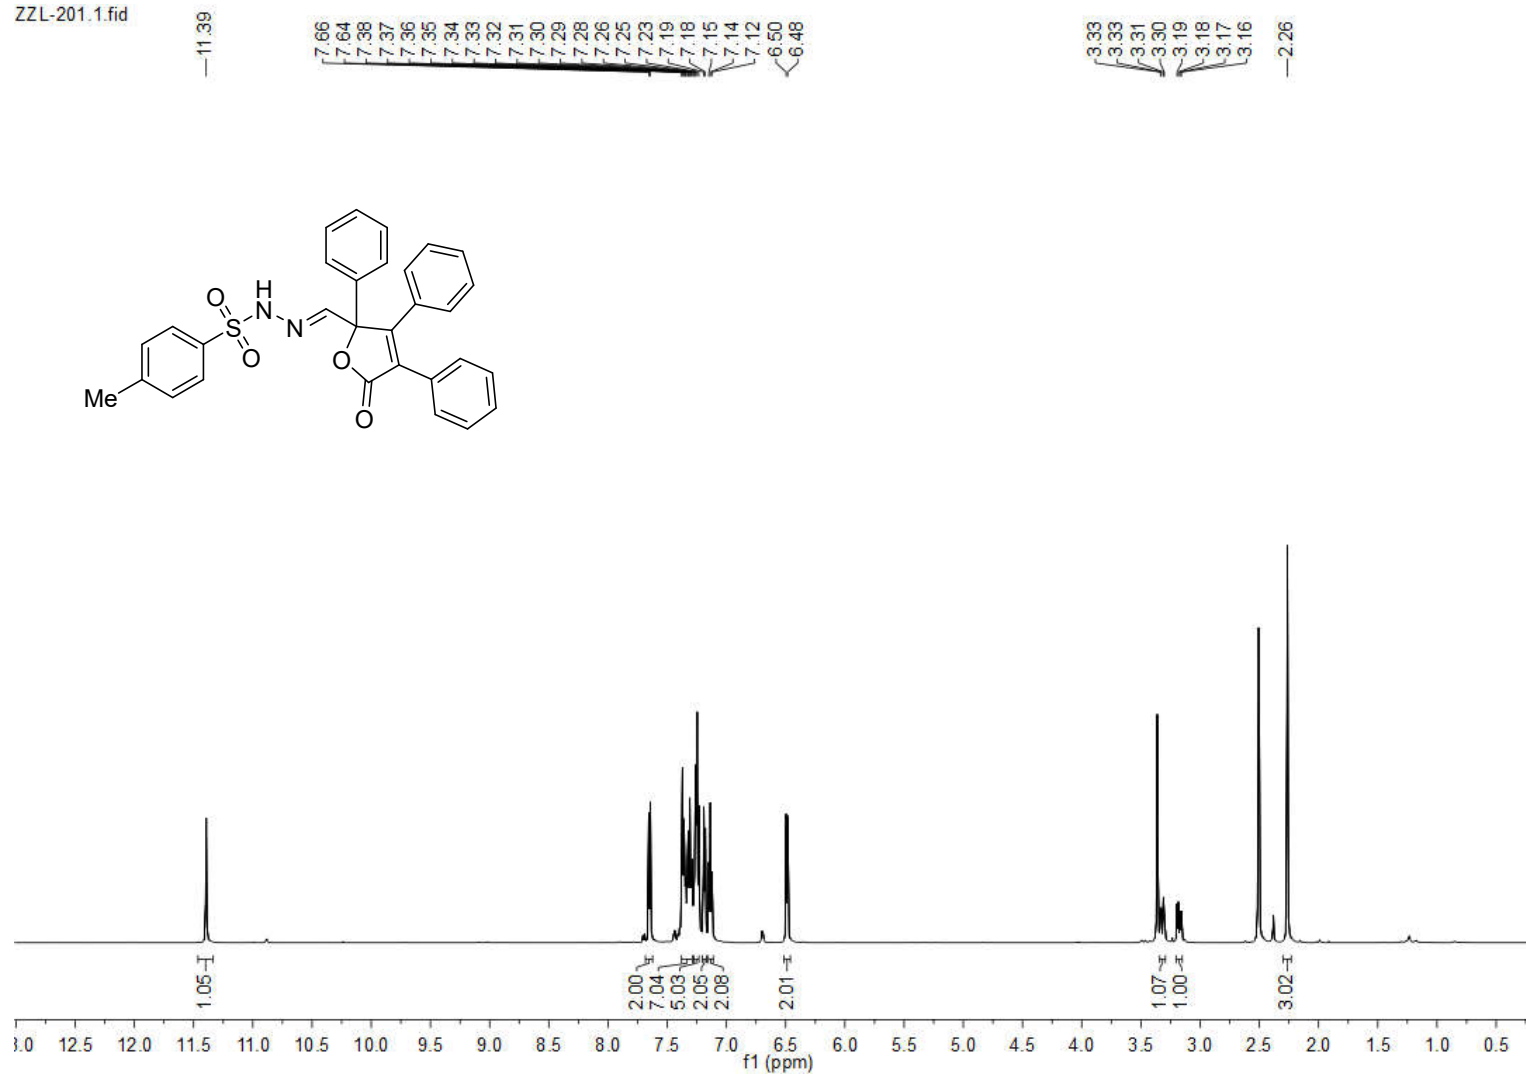

Figure S156. <sup>1</sup>H NMR (600 MHz, DMSO-*d*<sub>6</sub>) spectra of compound 11

ZZL-201.2.fid

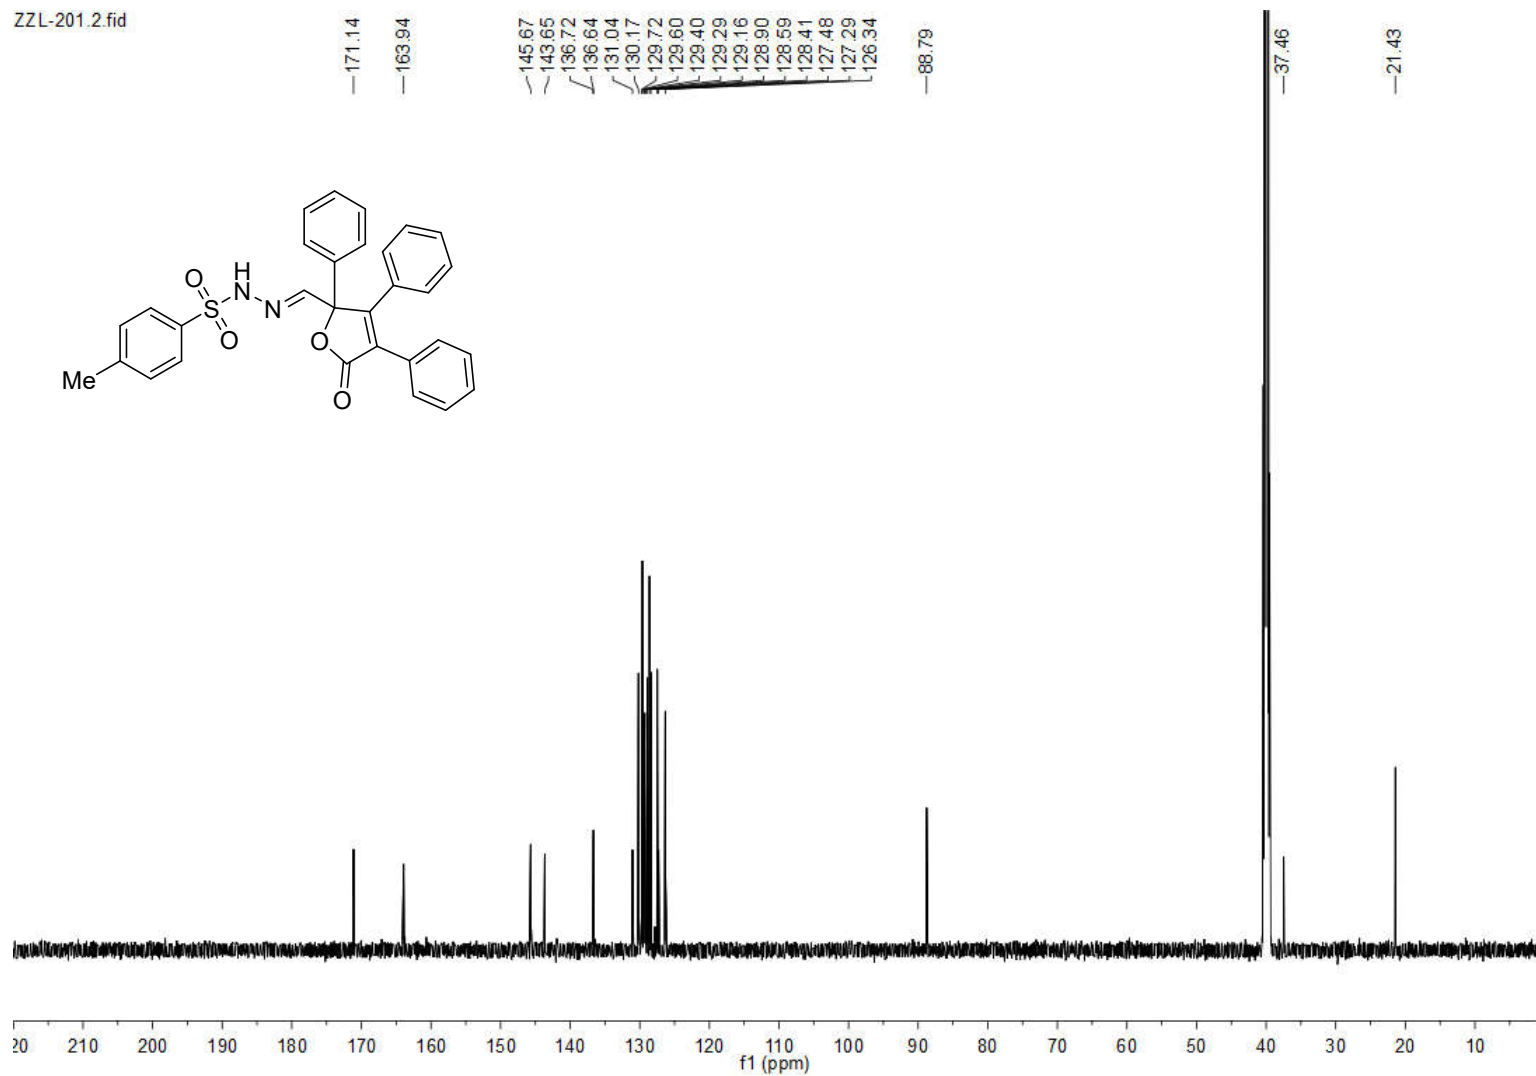

Figure S157.  $^{13}\text{C}$  NMR (150 MHz,  $\text{DMSO-}d_6$ ) spectra of compound 11

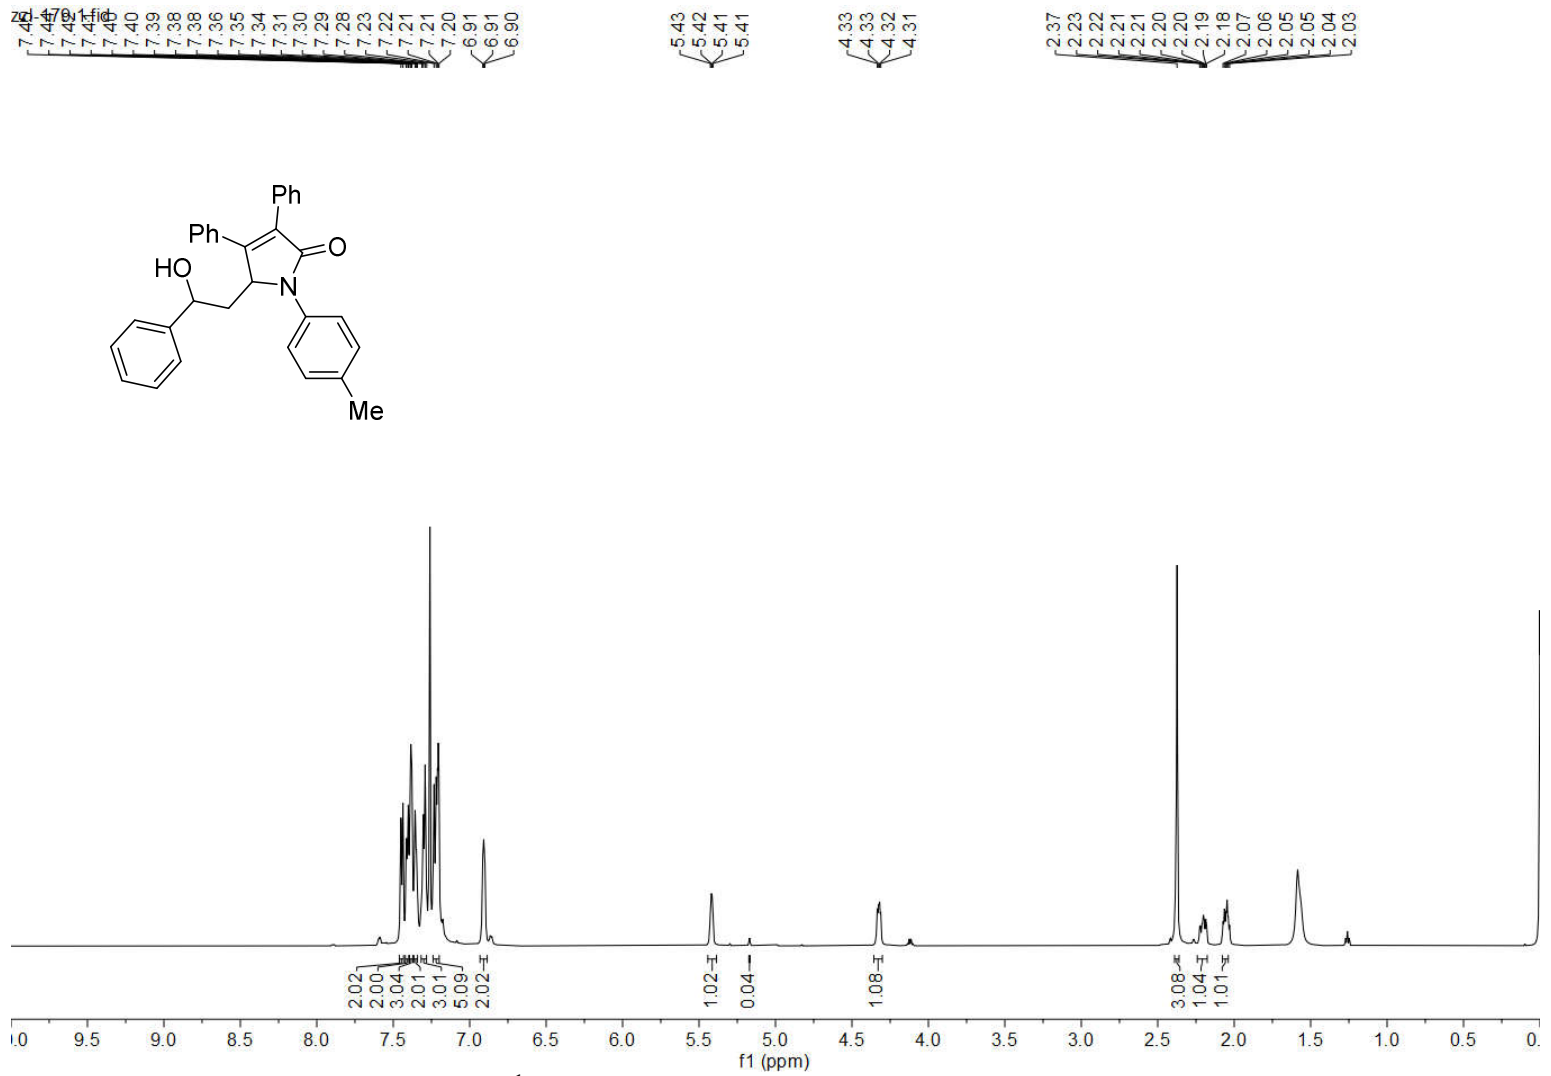

**Figure S158.** <sup>1</sup>H NMR (600 MHz, DMSO-*d*<sub>6</sub>) spectra of compound 12

zzl-179.2.fid

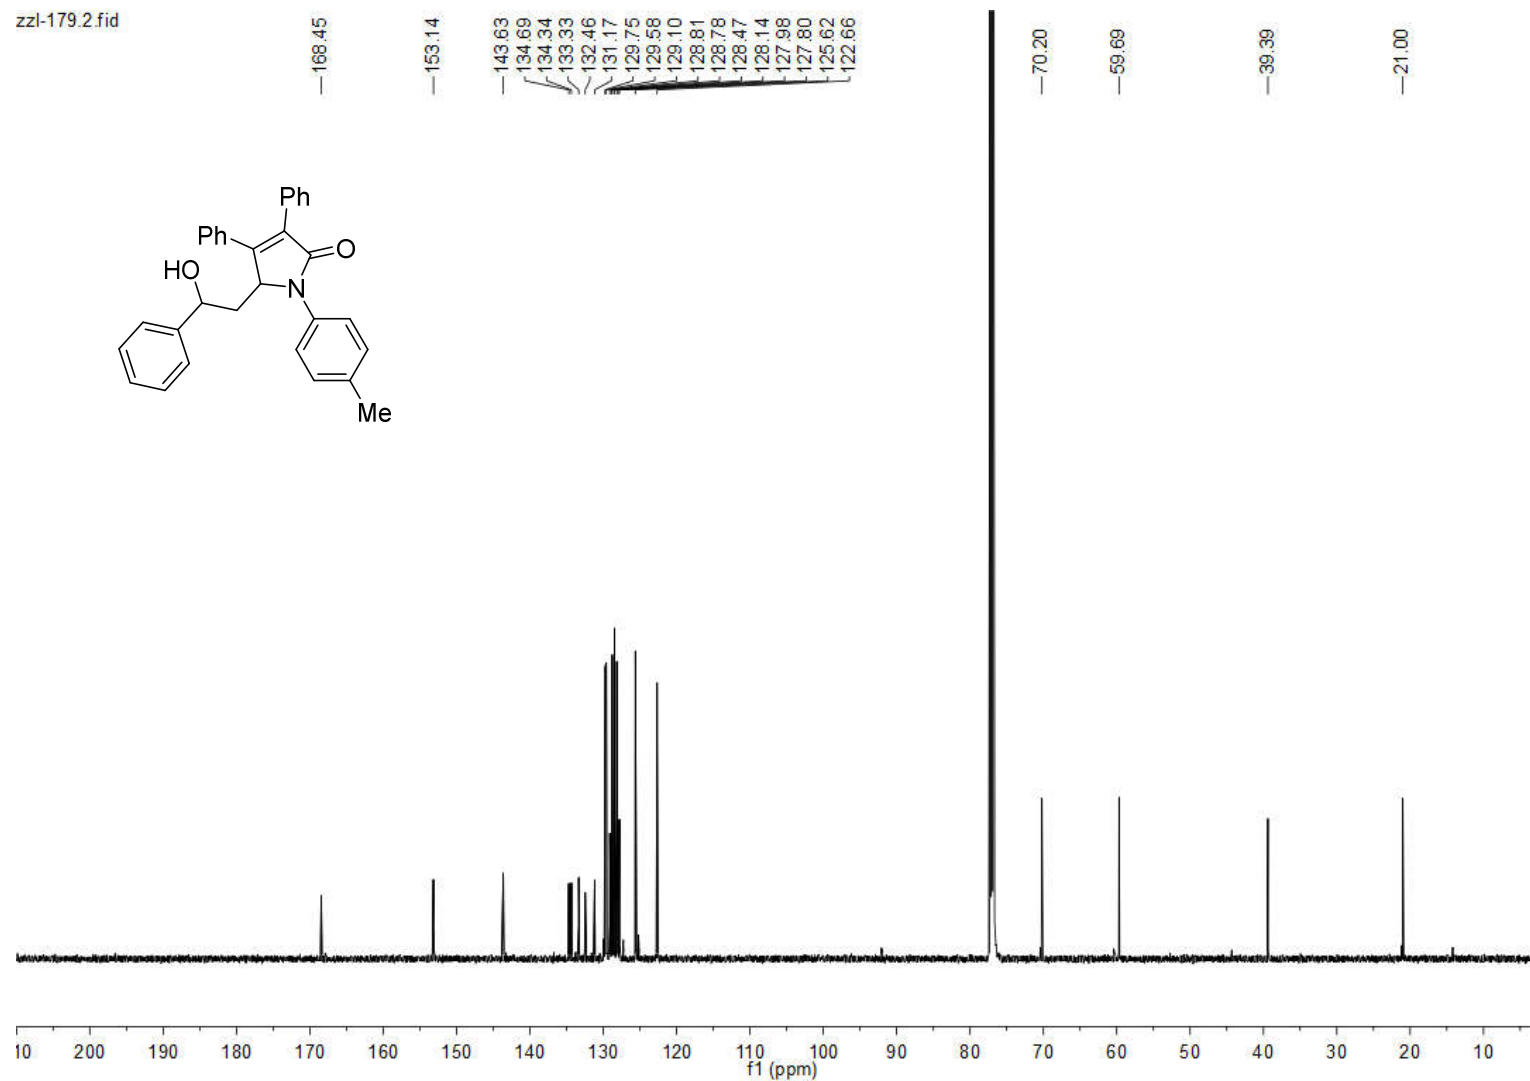

Figure S159.  $^{13}\text{C}$  NMR (150 MHz,  $\text{DMSO-}d_6$ ) spectra of compound 12

## 7. References and notes.

1. (a) Liu, Y.; Zhou, R.; Wan, J.-P. *Synth. Commun.*, **2013**, *43*, 2475. (b) Zhou, Z.-Z.; Liu, F.-S.; Shen, D.-S.; Tan, C.; Luo, L.-Y. *Inorg. Chem. Commun.*, **2011**, *14*, 659. (c) Larina, N. A.; Lokshin, V.; Berthet, J.; Delbaere, S.; Vermeersch, G.; Khodorkovsky, V. *Tetrahedron*, **2010**, *66*, 8291. (d) Zhou, P.; Hu, B.; Rao, K.; Li, L.; Yang, J.; Gao, C.; Wang, F.; Yu, F. *Synlett*, **2018**, *29*, 519.
2. (a) Miao, W.-H.; Gao, W.-X.; Huang, X.-B.; Liu, M.-C.; Zhou, Y.-B.; Wu, H.-Y. *Org. Lett.*, **2021**, *23*, 9425. (b) Wang, H.; Yan, R. *Adv. Synth. Catal.*, **2022**, *364*, 715.
3. (a) Yuan, W.; Li, X.; Qi, Z.; Li, X. *Org. Lett.* **2021**, *23*, 9425–9430. (b) Liu, L.; Wu, H.; Huang, G. *Chin. Chem. Lett.* **2021**, *32*, 3015–3018. (c) Li, X.; Han, C.; Yao, H.; Lin, A. *Org. Lett.* **2017**, *19*, 778. (d) Bai, D.; Yu, Y.; Guo, H.; Chang, J.; Li, X. *Angew. Chem. Int. Ed.* **2020**, *59*, 2740.
4. (a) Ren, J.-T.; Wang, J.-X.; Tian, H.; Xu, J.-L.; Hu, H.; Aslam, M.; Sun, M. *Org. Lett.* **2018**, *20*, 6636. (b) Xu, J.-L.; Tian, H.; Kang, J.-H.; Kang, W.-X.; Sun, W.; Sun, R.; Li, Y.-M.; Sun, M. *Org. Lett.* **2020**, *22*, 6739. (c) Yuan, W.; Li, X.; Qi, Z.; Li, X. *Org. Lett.* **2022**, *24*, 2093.
5. CCDC 2377854 contain the supplementary crystallographic data for compound **3v**. These data can be obtained free of charge from The Cambridge Crystallographic Data Center via [www.ccdc.cam.ac.uk/data\\_request/cif](http://www.ccdc.cam.ac.uk/data_request/cif).
6. CCDC 2391288 contain the supplementary crystallographic data for compound **5b**. These data can be obtained free of charge from The Cambridge Crystallographic Data Center via [www.ccdc.cam.ac.uk/data\\_request/cif](http://www.ccdc.cam.ac.uk/data_request/cif).
7. CCDC 2391289 contain the supplementary crystallographic data for compound **7a**. These data can be obtained free of charge from The Cambridge Crystallographic Data Center via [www.ccdc.cam.ac.uk/data\\_request/cif](http://www.ccdc.cam.ac.uk/data_request/cif).
